# Supplementary material
Source: PubMed Central journal article supplement (PMC3826687)
Supplement: supp_M042051_jlr.M042051-2.pdf [file supp_M042051_jlr.M042051-2.pdf]

| PROBE_ID     | SYMBOL   | WD...Chow | WD_Empty | WD_Tg_To | WD_Tg_To | AveExpr  | F        | P.Value  | adj.P.Val | Chow     | WD       | WD_Empty |
|--------------|----------|-----------|----------|----------|----------|----------|----------|----------|-----------|----------|----------|----------|
| ILMN_2705324 | Hipk2    | 1.042257  | 0.942314 | 1.500481 | 0.558167 | 5.812927 | 45.59528 | 1.73E-08 | 0.000133  | 4.941664 | 5.983921 | 5.883978 |
| ILMN_2935999 | Ube4b    | 1.458612  | 1.053674 | 1.09783  | 0.044156 | 9.805889 | 44.13291 | 2.23E-08 | 0.000133  | 8.90336  | 10.36197 | 9.957034 |
| ILMN_2656498 | Foxo1    | 1.126828  | 0.980331 | 0.853159 | -0.12717 | 7.132081 | 41.79057 | 3.38E-08 | 0.000133  | 6.392002 | 7.51883  | 7.372333 |
| ILMN_1231586 | Sertad2  | 1.404857  | 0.999282 | 1.273796 | 0.274515 | 5.783892 | 41.09979 | 3.84E-08 | 0.000133  | 4.864408 | 6.269265 | 5.86369  |
| ILMN_1237034 | AU040320 | 1.089196  | 1.106314 | 1.011311 | -0.095   | 12.27419 | 39.24563 | 5.45E-08 | 0.000133  | 11.47248 | 12.56168 | 12.5788  |
| ILMN_2724585 | Dag1     | 1.163483  | 0.984901 | 1.176295 | 0.191394 | 7.471337 | 39.2318  | 5.47E-08 | 0.000133  | 6.640168 | 7.803651 | 7.625069 |
| ILMN_1227936 | Cyp2d26  | 1.244765  | 1.335455 | 0.694381 | -0.64107 | 11.53597 | 38.76802 | 5.98E-08 | 0.000133  | 10.71732 | 11.96208 | 12.05277 |
| ILMN_3125920 | Mast2    | 1.370085  | 1.19255  | 1.480085 | 0.287534 | 8.051904 | 38.65329 | 6.12E-08 | 0.000133  | 7.041224 | 8.411308 | 8.233774 |
| ILMN_2625060 | Rps24    | -1.34706  | -0.83172 | -0.92895 | -0.09723 | 8.198223 | 37.90696 | 7.09E-08 | 0.000137  | 8.975154 | 7.628093 | 8.143436 |
| ILMN_2789904 | Abcg8    | 1.234699  | 1.560322 | 1.159783 | -0.40054 | 11.77449 | 37.01918 | 8.47E-08 | 0.000147  | 10.78579 | 12.02049 | 12.34611 |
| ILMN_2445166 | Vdr      | 1.322058  | 0.933318 | 1.150074 | 0.216757 | 10.48681 | 35.68737 | 1.11E-07 | 0.00017   | 9.635444 | 10.9575  | 10.56876 |
| ILMN_2917618 | Nck1     | -1.20617  | -0.69969 | -1.05917 | -0.35948 | 7.845943 | 35.44319 | 1.17E-07 | 0.00017   | 8.587201 | 7.38103  | 7.88751  |
| ILMN_2652181 | Mast2    | 1.304455  | 1.037501 | 1.396257 | 0.358756 | 9.222221 | 34.91542 | 1.31E-07 | 0.000171  | 8.287668 | 9.592123 | 9.325169 |
| ILMN_3023230 | Jmjd3    | 1.193618  | 1.039258 | 1.126392 | 0.087134 | 8.397177 | 34.54195 | 1.42E-07 | 0.000171  | 7.55736  | 8.750979 | 8.596618 |
| ILMN_2881681 | Tnrc6c   | 1.016635  | 0.924206 | 1.636324 | 0.712118 | 6.610481 | 34.37547 | 1.47E-07 | 0.000171  | 5.71619  | 6.732824 | 6.640396 |
| ILMN_1244906 | Ap1b1    | 1.156845  | 0.632767 | 0.850146 | 0.217379 | 10.49738 | 33.37577 | 1.83E-07 | 0.00019   | 9.837441 | 10.99429 | 10.47021 |
| ILMN_2642975 | Cyp2d26  | 1.178808  | 1.321149 | 0.642459 | -0.67869 | 11.45541 | 32.96426 | 2.01E-07 | 0.00019   | 10.66981 | 11.84861 | 11.99095 |
| ILMN_2864062 | Vdr      | 1.294661  | 1.146802 | 1.171187 | 0.024384 | 8.226555 | 32.95544 | 2.01E-07 | 0.00019   | 7.323393 | 8.618054 | 8.470195 |
| ILMN_2445165 | Vdr      | 1.352889  | 0.951427 | 1.177735 | 0.226309 | 10.12016 | 32.82513 | 2.07E-07 | 0.00019   | 9.249646 | 10.60253 | 10.20107 |
| ILMN_1228026 | Midn     | 1.21543   | 0.849399 | 1.146021 | 0.296622 | 10.97839 | 32.10801 | 2.44E-07 | 0.00021   | 10.17567 | 11.3911  | 11.02507 |
| ILMN_2924243 | Itgb1bp1 | -1.03706  | -0.53304 | -0.88395 | -0.35092 | 8.266923 | 31.93943 | 2.54E-07 | 0.00021   | 8.880437 | 7.843372 | 8.347398 |
| ILMN_3148489 | Furin    | 1.108847  | 1.200546 | 1.232632 | 0.032086 | 10.76565 | 30.85995 | 3.26E-07 | 0.000238  | 9.880143 | 10.98899 | 11.08069 |
| ILMN_2604643 | Tbl2     | 1.182067  | 0.853756 | 0.832728 | -0.02103 | 7.804274 | 30.79326 | 3.31E-07 | 0.000238  | 7.087136 | 8.269203 | 7.940892 |
| ILMN_2853957 | Dag1     | 1.24235   | 0.987939 | 1.167398 | 0.179459 | 8.280834 | 30.73563 | 3.36E-07 | 0.000238  | 7.431413 | 8.673763 | 8.419352 |
| ILMN_2766930 | Faah     | 1.343257  | 1.053526 | 0.891826 | -0.1617  | 10.48597 | 30.55782 | 3.50E-07 | 0.000238  | 9.663822 | 11.00708 | 10.71735 |
| ILMN_1233901 | Lsm7     | -1.35771  | -0.88196 | -1.03617 | -0.15421 | 10.43916 | 30.49154 | 3.56E-07 | 0.000238  | 11.25813 | 9.900414 | 10.37617 |
| ILMN_2658566 | Midn     | 1.239139  | 0.891087 | 1.168426 | 0.277339 | 10.6902  | 30.19527 | 3.82E-07 | 0.00024   | 9.865538 | 11.10468 | 10.75662 |
| ILMN_1242264 | Supt6h   | 1.015531  | 0.662574 | 0.965108 | 0.302534 | 9.92851  | 30.14491 | 3.87E-07 | 0.00024   | 9.267707 | 10.28324 | 9.930281 |
| ILMN_2681474 | Lmtk2    | 1.291399  | 1.522199 | 1.348103 | -0.1741  | 10.59387 | 29.71338 | 4.29E-07 | 0.000258  | 9.553447 | 10.84485 | 11.07565 |
| ILMN_2964785 | Zfhx2    | 1.263711  | 0.990677 | 1.530793 | 0.540116 | 6.545724 | 29.28821 | 4.77E-07 | 0.000272  | 5.599429 | 6.86314  | 6.590106 |
| ILMN_1232776 | Mrpl11   | -0.98456  | -0.6222  | -0.97279 | -0.35059 | 9.117129 | 29.10053 | 4.99E-07 | 0.000272  | 9.762016 | 8.777458 | 9.139816 |
| ILMN_1247682 | Atp6v0a1 | 1.151652  | 1.16998  | 1.344621 | 0.174641 | 8.951254 | 28.90495 | 5.24E-07 | 0.000272  | 8.034691 | 9.186343 | 9.204671 |
| ILMN_2994895 | Wdr68    | 1.088388  | 0.730908 | 0.889408 | 0.158501 | 10.5681  | 28.81112 | 5.37E-07 | 0.000272  | 9.890922 | 10.97931 | 10.62183 |
| ILMN_2754253 | Gna13    | 1.075267  | 0.714911 | 1.160496 | 0.445585 | 9.100511 | 28.76414 | 5.43E-07 | 0.000272  | 8.362843 | 9.43811  | 9.077754 |

|              |           |          |          |          |          |          |          |          |          |          |          |          |
|--------------|-----------|----------|----------|----------|----------|----------|----------|----------|----------|----------|----------|----------|
| ILMN_2980858 | Mboat5    | 1.141578 | 1.15879  | 0.760143 | -0.39865 | 12.38819 | 28.73884 | 5.47E-07 | 0.000272 | 11.62307 | 12.76464 | 12.78186 |
| ILMN_2723763 | Chga      | 1.879817 | 1.128013 | 0.964717 | -0.1633  | 6.717279 | 28.59027 | 5.67E-07 | 0.000274 | 5.724142 | 7.60396  | 6.852155 |
| ILMN_2738264 | Dusp19    | -1.12129 | -0.90295 | -1.01509 | -0.11214 | 7.813697 | 28.30075 | 6.11E-07 | 0.000287 | 8.573529 | 7.452238 | 7.670582 |
| ILMN_2766455 | Lrrc5     | 1.027054 | 0.891679 | 1.015049 | 0.12337  | 10.69358 | 28.18679 | 6.29E-07 | 0.000288 | 9.960134 | 10.98719 | 10.85181 |
| ILMN_2651643 | Naca      | -0.65025 | -0.62627 | -1.03698 | -0.41071 | 9.922915 | 28.08152 | 6.46E-07 | 0.000288 | 10.50129 | 9.851039 | 9.875022 |
| ILMN_1253692 | Glg1      | 1.447072 | 1.320972 | 1.683785 | 0.362812 | 9.564888 | 27.71509 | 7.09E-07 | 0.000309 | 8.451931 | 9.899003 | 9.772903 |
| ILMN_2748941 | Al429612  | 1.159203 | 0.898135 | 0.885679 | -0.01246 | 11.46141 | 27.52823 | 7.45E-07 | 0.000316 | 10.72565 | 11.88486 | 11.62379 |
| ILMN_2942276 | Luzp1     | 1.116387 | 1.084656 | 1.359014 | 0.274358 | 10.20383 | 27.33464 | 7.83E-07 | 0.000325 | 9.313815 | 10.4302  | 10.39847 |
| ILMN_2657980 | Faah      | 1.011401 | 0.734053 | 0.830852 | 0.096799 | 11.13894 | 27.15502 | 8.21E-07 | 0.000328 | 10.49487 | 11.50627 | 11.22892 |
| ILMN_2619408 | Atf3      | -2.90185 | -2.48423 | -2.02895 | 0.455279 | 7.021522 | 27.00284 | 8.54E-07 | 0.000328 | 8.875277 | 5.973428 | 6.391051 |
| ILMN_2760430 | Lrp10     | 0.941636 | 0.827989 | 0.929705 | 0.101716 | 12.34558 | 26.98185 | 8.59E-07 | 0.000328 | 11.67075 | 12.61239 | 12.49874 |
| ILMN_3098616 | Tug1      | 1.07017  | 0.722196 | 0.60212  | -0.12008 | 5.614863 | 26.9543  | 8.65E-07 | 0.000328 | 5.016242 | 6.086412 | 5.738437 |
| ILMN_2628551 | 2900010DC | 1.175491 | 0.690866 | 0.817725 | 0.126859 | 8.491255 | 26.67401 | 9.32E-07 | 0.000333 | 7.820234 | 8.995726 | 8.511101 |
| ILMN_1214561 | 3110018K1 | 0.876199 | 0.729013 | 1.054461 | 0.325449 | 8.773682 | 26.65335 | 9.37E-07 | 0.000333 | 8.108764 | 8.984963 | 8.837777 |
| ILMN_2770471 | Slc9a1    | 1.194359 | 1.137856 | 1.24823  | 0.110374 | 8.329191 | 26.57926 | 9.56E-07 | 0.000333 | 7.43408  | 8.628439 | 8.571936 |
| ILMN_2634338 | 1110002BC | -1.21225 | -0.97513 | -0.86835 | 0.106781 | 9.163191 | 26.50804 | 9.75E-07 | 0.000333 | 9.927124 | 8.714876 | 8.951991 |
| ILMN_2684145 | Sdcbp2    | -1.30456 | -1.18614 | -0.94128 | 0.24486  | 10.03108 | 26.34115 | 1.02E-06 | 0.000333 | 10.88907 | 9.584516 | 9.702933 |
| ILMN_1213858 | 493047101 | -0.63202 | -0.79562 | -0.98039 | -0.18477 | 7.099337 | 26.33388 | 1.02E-06 | 0.000333 | 7.701345 | 7.069322 | 6.905725 |
| ILMN_1223848 | 5730509CC | 0.856908 | 1.080201 | 1.468886 | 0.388685 | 8.211841 | 26.32026 | 1.03E-06 | 0.000333 | 7.360342 | 8.21725  | 8.440543 |
| ILMN_1251729 | Nfe2l1    | 0.61755  | 0.883875 | 0.991548 | 0.107673 | 8.722682 | 26.29374 | 1.03E-06 | 0.000333 | 8.099438 | 8.716988 | 8.983313 |
| ILMN_1229535 | Cyp2d10   | 1.267811 | 1.483902 | 1.00464  | -0.47926 | 8.375468 | 26.00717 | 1.12E-06 | 0.000343 | 7.43638  | 8.704191 | 8.920282 |
| ILMN_1230145 | Acvr2b    | 0.971438 | 0.950037 | 1.421441 | 0.471404 | 7.344867 | 25.95445 | 1.13E-06 | 0.000343 | 6.509138 | 7.480577 | 7.459175 |
| ILMN_1217144 | Tbc1d5    | 1.0647   | 0.84938  | 0.982441 | 0.13306  | 8.503133 | 25.9422  | 1.14E-06 | 0.000343 | 7.779003 | 8.843703 | 8.628383 |
| ILMN_2832641 | Ndst1     | 1.209662 | 1.397945 | 1.49949  | 0.101544 | 7.908981 | 25.92365 | 1.14E-06 | 0.000343 | 6.882207 | 8.091869 | 8.280153 |
| ILMN_2638147 | 2410127E1 | 0.969389 | 0.715737 | 1.012729 | 0.296992 | 9.2994   | 25.79162 | 1.18E-06 | 0.000349 | 8.624937 | 9.594326 | 9.340674 |
| ILMN_1239806 | Rpa3      | -1.3348  | -0.88212 | -1.21051 | -0.32838 | 10.04356 | 25.48674 | 1.29E-06 | 0.000373 | 10.90042 | 9.565619 | 10.01829 |
| ILMN_2776552 | Hprt      | -0.9517  | -0.84512 | -0.84471 | 0.000406 | 6.609383 | 25.23826 | 1.38E-06 | 0.000393 | 7.269767 | 6.318063 | 6.424647 |
| ILMN_3136867 | Josd3     | -0.9471  | -0.82556 | -1.11418 | -0.28863 | 6.470835 | 24.9432  | 1.50E-06 | 0.000412 | 7.192546 | 6.245445 | 6.366989 |
| ILMN_2651642 | Naca      | -0.6792  | -0.67551 | -1.08363 | -0.40812 | 9.773333 | 24.94004 | 1.50E-06 | 0.000412 | 10.38292 | 9.703719 | 9.707407 |
| ILMN_2609807 | Sec61b    | -0.91524 | -0.52382 | -0.85074 | -0.32692 | 10.34118 | 24.86644 | 1.53E-06 | 0.000412 | 10.91364 | 9.998393 | 10.38981 |
| ILMN_2750767 | Pcnx      | 1.346899 | 1.294349 | 1.282003 | -0.01235 | 6.981558 | 24.85029 | 1.54E-06 | 0.000412 | 6.000745 | 7.347644 | 7.295094 |
| ILMN_2689887 | Mark2     | 1.06235  | 0.871577 | 1.097399 | 0.225821 | 11.29547 | 24.7772  | 1.57E-06 | 0.000414 | 10.53763 | 11.59998 | 11.40921 |
| ILMN_3109360 | Plec1     | 1.289235 | 1.526162 | 1.739829 | 0.213667 | 8.405889 | 24.72779 | 1.59E-06 | 0.000414 | 7.267082 | 8.556317 | 8.793245 |
| ILMN_2633333 | Brd4      | 1.163732 | 0.907538 | 1.180772 | 0.273234 | 9.473131 | 24.64232 | 1.63E-06 | 0.000417 | 8.66012  | 9.823853 | 9.567659 |
| ILMN_1244431 | Sel1h     | 1.091879 | 0.922133 | 0.7358   | -0.18633 | 9.154881 | 24.42931 | 1.73E-06 | 0.000437 | 8.467428 | 9.559307 | 9.389561 |

|              |           |          |          |          |          |          |          |          |          |          |          |          |
|--------------|-----------|----------|----------|----------|----------|----------|----------|----------|----------|----------|----------|----------|
| ILMN_1225037 | Grit      | 1.060555 | 0.841304 | 1.2662   | 0.424896 | 7.198349 | 24.33093 | 1.78E-06 | 0.000443 | 6.406334 | 7.46689  | 7.247638 |
| ILMN_2975041 | Nxt1      | -0.90277 | -0.68287 | -0.99712 | -0.31425 | 8.379389 | 24.05659 | 1.93E-06 | 0.000473 | 9.025078 | 8.122308 | 8.342212 |
| ILMN_1229110 | Mrpl33    | -0.92882 | -0.63296 | -0.74845 | -0.11549 | 11.6886  | 23.99082 | 1.97E-06 | 0.000475 | 12.26616 | 11.33734 | 11.6332  |
| ILMN_2959272 | Rnu6      | -1.23554 | -0.4002  | -0.62251 | -0.22231 | 11.47409 | 23.89464 | 2.02E-06 | 0.000476 | 12.03865 | 10.80311 | 11.63845 |
| ILMN_1231371 | 1110011K1 | -1.05866 | -0.58157 | -0.78943 | -0.20786 | 10.2776  | 23.89048 | 2.02E-06 | 0.000476 | 10.88501 | 9.826354 | 10.30344 |
| ILMN_2611510 | Surb7     | -1.2764  | -1.00917 | -1.25772 | -0.24855 | 8.371834 | 23.7461  | 2.11E-06 | 0.00049  | 9.257655 | 7.981259 | 8.248486 |
| ILMN_1218206 | Klf13     | 1.330878 | 0.7628   | 1.053244 | 0.290444 | 7.265221 | 23.45051 | 2.30E-06 | 0.000528 | 6.47849  | 7.809369 | 7.24129  |
| ILMN_2445324 | Zfpm1     | 1.443441 | 1.158643 | 1.373797 | 0.215154 | 11.26391 | 23.30808 | 2.40E-06 | 0.000535 | 10.26994 | 11.71338 | 11.42858 |
| ILMN_2961216 | Slco2a1   | 1.214506 | 1.262942 | 1.42644  | 0.163498 | 8.849368 | 23.30102 | 2.41E-06 | 0.000535 | 7.873396 | 9.087902 | 9.136338 |
| ILMN_2686721 | Tap2      | 1.439253 | 1.493088 | 1.115972 | -0.37712 | 9.196077 | 23.24687 | 2.45E-06 | 0.000535 | 8.183999 | 9.623251 | 9.677087 |
| ILMN_1259668 | LOC228715 | -1.12702 | -0.72039 | -0.86259 | -0.1422  | 9.465864 | 23.18897 | 2.49E-06 | 0.000535 | 10.14336 | 9.01634  | 9.422976 |
| ILMN_2821014 | Timm8b    | -1.00925 | -0.92764 | -1.02269 | -0.09505 | 11.88431 | 23.18757 | 2.49E-06 | 0.000535 | 12.62421 | 11.61496 | 11.69657 |
| ILMN_2781118 | 2210021J2 | -1.01266 | -0.60954 | -0.86174 | -0.2522  | 7.613792 | 23.14085 | 2.52E-06 | 0.000536 | 8.234777 | 7.222118 | 7.625237 |
| ILMN_2684874 | Fxc1      | -1.0378  | -0.58435 | -1.05017 | -0.46582 | 9.210682 | 23.06507 | 2.58E-06 | 0.000542 | 9.878764 | 8.840961 | 9.294413 |
| ILMN_2672597 | Gng10     | -1.08424 | -0.82803 | -0.96808 | -0.14005 | 8.619771 | 22.97808 | 2.65E-06 | 0.000549 | 9.339857 | 8.25562  | 8.51183  |
| ILMN_1214498 | Cyp2d22   | 1.01521  | 1.180357 | 0.834011 | -0.34635 | 11.0703  | 22.88398 | 2.73E-06 | 0.000559 | 10.3129  | 11.32811 | 11.49326 |
| ILMN_2846368 | Bola2     | -1.10224 | -0.56943 | -0.82689 | -0.25746 | 10.45402 | 22.73053 | 2.86E-06 | 0.000573 | 11.07866 | 9.976414 | 10.50922 |
| ILMN_2645275 | Mvd       | -0.99707 | -1.21755 | -0.7091  | 0.508453 | 6.873249 | 22.69146 | 2.89E-06 | 0.000573 | 7.60418  | 6.60711  | 6.386626 |
| ILMN_2795359 | Hdlbp     | 1.087571 | 0.564416 | 0.717729 | 0.153313 | 10.74428 | 22.60257 | 2.97E-06 | 0.000573 | 10.15185 | 11.23942 | 10.71626 |
| ILMN_3095624 | Jmjd3     | 1.158484 | 1.13679  | 1.212378 | 0.075588 | 6.122079 | 22.54732 | 3.02E-06 | 0.000573 | 5.245166 | 6.403649 | 6.381956 |
| ILMN_2894396 | BC019731  | 1.029858 | 1.153815 | 0.970202 | -0.18361 | 10.42537 | 22.50894 | 3.06E-06 | 0.000573 | 9.636902 | 10.66676 | 10.79072 |
| ILMN_2685769 | AW555464  | 1.285716 | 0.899074 | 1.13877  | 0.239696 | 9.550372 | 22.4947  | 3.07E-06 | 0.000573 | 8.719482 | 10.0052  | 9.618556 |
| ILMN_2813454 | Dnajc15   | -1.02992 | -0.88892 | -1.15818 | -0.26926 | 10.72579 | 22.49252 | 3.07E-06 | 0.000573 | 11.49505 | 10.46513 | 10.60613 |
| ILMN_2784078 | Mmp15     | 1.042791 | 1.285139 | 1.275703 | -0.00944 | 8.352601 | 22.4689  | 3.09E-06 | 0.000573 | 7.451693 | 8.494484 | 8.736832 |
| ILMN_2744356 | Arbp      | -1.14356 | -0.64459 | -0.64254 | 0.002046 | 8.238232 | 22.43001 | 3.13E-06 | 0.000573 | 8.845904 | 7.702344 | 8.201316 |
| ILMN_2609809 | Sec61b    | -1.2415  | -0.68198 | -1.03038 | -0.3484  | 8.268111 | 22.40141 | 3.16E-06 | 0.000573 | 9.006576 | 7.765078 | 8.324594 |
| ILMN_1248181 | Zbtb7     | 1.346494 | 0.993899 | 1.69716  | 0.703261 | 7.248266 | 22.39862 | 3.16E-06 | 0.000573 | 6.238878 | 7.585371 | 7.232776 |
| ILMN_3151510 | Sertad2   | 0.803582 | 0.740828 | 0.877482 | 0.136654 | 9.643009 | 22.34226 | 3.22E-06 | 0.000577 | 9.037536 | 9.841118 | 9.778364 |
| ILMN_2953596 | E2f5      | -1.32449 | -1.11503 | -0.57417 | 0.540865 | 7.584708 | 22.29007 | 3.27E-06 | 0.00058  | 8.338131 | 7.013638 | 7.223099 |
| ILMN_1216689 | Aplp2     | 1.092776 | 1.097139 | 1.381017 | 0.283879 | 10.9065  | 22.22485 | 3.33E-06 | 0.000586 | 10.01377 | 11.10654 | 11.1109  |
| ILMN_2624135 | 2610028L1 | -0.7004  | -0.67789 | -1.0932  | -0.41532 | 8.106784 | 22.19367 | 3.37E-06 | 0.000586 | 8.724657 | 8.024254 | 8.046771 |
| ILMN_2680406 | Rnf44     | 1.044376 | 0.690799 | 1.035321 | 0.344522 | 10.31267 | 22.11424 | 3.45E-06 | 0.000595 | 9.62005  | 10.66443 | 10.31085 |
| ILMN_2761662 | BC042901  | 0.914057 | 0.732843 | 1.015969 | 0.283126 | 6.426178 | 21.95975 | 3.62E-06 | 0.000618 | 5.76046  | 6.674517 | 6.493304 |
| ILMN_2849285 | Krt10     | -1.14938 | -0.69166 | -0.8409  | -0.14924 | 8.348522 | 21.92278 | 3.66E-06 | 0.000619 | 9.019008 | 7.869624 | 8.327351 |
| ILMN_2713898 | Ddr1      | 0.567274 | 0.920933 | 0.93432  | 0.013387 | 8.743432 | 21.77668 | 3.83E-06 | 0.000635 | 8.1378   | 8.705075 | 9.058734 |

|              |           |          |          |          |          |          |          |          |          |          |          |          |
|--------------|-----------|----------|----------|----------|----------|----------|----------|----------|----------|----------|----------|----------|
| ILMN_2626389 | D7Ertd156 | 1.100714 | 0.737917 | 0.844604 | 0.106686 | 10.33481 | 21.74553 | 3.87E-06 | 0.000635 | 9.664005 | 10.76472 | 10.40192 |
| ILMN_2609087 | Mrpl40    | -0.97288 | -0.73421 | -0.83584 | -0.10163 | 10.32398 | 21.7427  | 3.87E-06 | 0.000635 | 10.95971 | 9.98683  | 10.2255  |
| ILMN_2960750 | Traf6     | 0.829204 | 0.689208 | 0.88419  | 0.194981 | 7.545897 | 21.71743 | 3.90E-06 | 0.000635 | 6.945246 | 7.77445  | 7.634455 |
| ILMN_2679428 | 1110058L1 | -0.83515 | -0.78611 | -0.83523 | -0.04912 | 9.438462 | 21.65929 | 3.98E-06 | 0.000641 | 10.05259 | 9.217433 | 9.266477 |
| ILMN_2919860 | Cds1      | 1.053342 | 0.868898 | 1.016503 | 0.147605 | 11.0976  | 21.50473 | 4.17E-06 | 0.000657 | 10.36292 | 11.41626 | 11.23181 |
| ILMN_2616164 | Itga3     | 1.043947 | 0.908174 | 0.932447 | 0.024273 | 9.594875 | 21.47435 | 4.21E-06 | 0.000657 | 8.873733 | 9.917679 | 9.781907 |
| ILMN_2729162 | Sertad1   | -1.35641 | -0.98309 | -0.97425 | 0.008836 | 8.559536 | 21.47151 | 4.22E-06 | 0.000657 | 9.387975 | 8.031564 | 8.404884 |
| ILMN_2840430 | BC029169  | 1.083822 | 1.162835 | 1.054211 | -0.10862 | 8.716987 | 21.46581 | 4.23E-06 | 0.000657 | 7.89177  | 8.975592 | 9.054604 |
| ILMN_2691360 | Mrps10    | -0.85106 | -0.85634 | -1.10655 | -0.25021 | 8.236637 | 21.38157 | 4.34E-06 | 0.000664 | 8.940126 | 8.089062 | 8.083786 |
| ILMN_2845849 | Xpr1      | 1.114693 | 0.977092 | 0.953387 | -0.0237  | 8.634952 | 21.37694 | 4.35E-06 | 0.000664 | 7.873659 | 8.988352 | 8.850751 |
| ILMN_2473531 | Pik3r1    | 1.13839  | 0.63873  | 1.22887  | 0.59014  | 9.069393 | 21.22097 | 4.57E-06 | 0.000691 | 8.317895 | 9.456285 | 8.956625 |
| ILMN_2828420 | 4631427C1 | 1.244965 | 0.758998 | 0.860272 | 0.101273 | 9.203767 | 21.0691  | 4.80E-06 | 0.00071  | 8.487708 | 9.732673 | 9.246707 |
| ILMN_2602597 | Sh3md2    | 1.072093 | 0.615594 | 0.84168  | 0.226087 | 9.032362 | 21.06719 | 4.80E-06 | 0.00071  | 8.40002  | 9.472113 | 9.015614 |
| ILMN_1259148 | Nudt2     | -0.69207 | -0.588   | -0.87997 | -0.29197 | 7.992322 | 21.0551  | 4.82E-06 | 0.00071  | 8.532332 | 7.840263 | 7.94433  |
| ILMN_3062267 | Acot1     | 3.244852 | 3.625319 | 1.11847  | -2.50685 | 7.233771 | 21.03158 | 4.85E-06 | 0.00071  | 5.236611 | 8.481462 | 8.86193  |
| ILMN_2736975 | Bat3      | 0.875134 | 0.655653 | 0.787033 | 0.13138  | 7.571753 | 20.96344 | 4.96E-06 | 0.000719 | 6.992298 | 7.867431 | 7.647951 |
| ILMN_2933914 | Psm14     | -1.09856 | -1.05511 | -1.11072 | -0.05561 | 7.534997 | 20.94116 | 5.00E-06 | 0.000719 | 8.351097 | 7.252532 | 7.295984 |
| ILMN_2602396 | 2810410M  | -0.77907 | -0.69055 | -0.73423 | -0.04368 | 10.08496 | 20.87268 | 5.11E-06 | 0.000725 | 10.63592 | 9.856847 | 9.945368 |
| ILMN_2720180 | 1810044O  | 1.056043 | 0.775501 | 0.777416 | 0.001915 | 13.04159 | 20.86493 | 5.12E-06 | 0.000725 | 12.38935 | 13.44539 | 13.16485 |
| ILMN_1239384 | Psm10     | -0.79285 | -0.7374  | -1.05528 | -0.31789 | 8.264601 | 20.7707  | 5.28E-06 | 0.000741 | 8.910984 | 8.118131 | 8.173588 |
| ILMN_2599997 | Ncor1     | 1.000273 | 1.066327 | 1.287731 | 0.221404 | 8.644574 | 20.5856  | 5.61E-06 | 0.000781 | 7.805991 | 8.806264 | 8.872318 |
| ILMN_2768252 | Myl7      | -1.31999 | -1.3697  | -1.32921 | 0.040486 | 6.285448 | 20.50602 | 5.76E-06 | 0.000795 | 7.290173 | 5.97018  | 5.920476 |
| ILMN_1229340 | C130086A1 | -1.74313 | -0.9028  | -1.16358 | -0.26078 | 6.903707 | 20.46733 | 5.83E-06 | 0.000799 | 7.856084 | 6.112955 | 6.953286 |
| ILMN_1242912 | Pof1b     | -1.62659 | -0.8899  | -0.19243 | 0.697468 | 8.300192 | 20.43193 | 5.90E-06 | 0.000802 | 8.977421 | 7.35083  | 8.087524 |
| ILMN_2598520 | 2410091C1 | -0.30395 | -0.5317  | -0.86978 | -0.33808 | 7.196969 | 20.28731 | 6.19E-06 | 0.000835 | 7.623325 | 7.319374 | 7.091628 |
| ILMN_1250538 | D10Ucla1  | 1.106338 | 1.202743 | 1.153359 | -0.04938 | 10.08861 | 20.23786 | 6.29E-06 | 0.000842 | 9.223003 | 10.32934 | 10.42575 |
| ILMN_2528345 | LOC239102 | 0.871927 | 0.426436 | 1.22485  | 0.798414 | 6.488094 | 20.16128 | 6.45E-06 | 0.000857 | 5.85729  | 6.729218 | 6.283727 |
| ILMN_2789762 | ORF9      | -1.37662 | -1.12124 | -0.9432  | 0.178043 | 9.340804 | 20.09702 | 6.59E-06 | 0.000859 | 10.20107 | 8.824448 | 9.079828 |
| ILMN_2838871 | BC023957  | 0.869642 | 1.24177  | 1.279497 | 0.037726 | 9.256953 | 20.05867 | 6.67E-06 | 0.000859 | 8.409226 | 9.278868 | 9.650996 |
| ILMN_3144289 | Traf3     | 1.024054 | 0.729363 | 1.124916 | 0.395553 | 7.537268 | 20.05527 | 6.68E-06 | 0.000859 | 6.817685 | 7.841739 | 7.547048 |
| ILMN_2675249 | Slc35c1   | 1.185283 | 0.749682 | 0.839497 | 0.089816 | 11.57273 | 19.97987 | 6.85E-06 | 0.000859 | 10.87912 | 12.0644  | 11.6288  |
| ILMN_3034303 | BC040758  | 0.786673 | 0.928803 | 1.059506 | 0.130703 | 13.01073 | 19.95375 | 6.91E-06 | 0.000859 | 12.31699 | 13.10366 | 13.24579 |
| ILMN_1240471 | 0610039N1 | 1.757229 | 1.833797 | 0.778046 | -1.05575 | 12.97254 | 19.95047 | 6.92E-06 | 0.000859 | 11.88027 | 13.6375  | 13.71407 |
| ILMN_2629835 | Mrpl33    | -0.85688 | -0.46516 | -0.71605 | -0.25089 | 11.78112 | 19.94883 | 6.92E-06 | 0.000859 | 12.29065 | 11.43377 | 11.82549 |
| ILMN_2598877 | Slc7a8    | 1.594361 | 1.224139 | 1.400286 | 0.176147 | 9.916095 | 19.93315 | 6.96E-06 | 0.000859 | 8.861399 | 10.45576 | 10.08554 |

|              |           |          |          |          |          |          |          |          |          |          |          |          |
|--------------|-----------|----------|----------|----------|----------|----------|----------|----------|----------|----------|----------|----------|
| ILMN_1243900 | Eppk1     | 0.430236 | 0.325296 | 0.913634 | 0.588338 | 9.222268 | 19.93129 | 6.97E-06 | 0.000859 | 8.804977 | 9.235213 | 9.130273 |
| ILMN_2541142 | LOC38201C | -0.90813 | -0.84369 | -1.15853 | -0.31484 | 6.675753 | 19.92876 | 6.97E-06 | 0.000859 | 7.403342 | 6.495208 | 6.559651 |
| ILMN_3134301 | Slc35c1   | 0.936294 | 0.557119 | 0.589395 | 0.032276 | 9.244775 | 19.89194 | 7.06E-06 | 0.000859 | 8.724073 | 9.660367 | 9.281192 |
| ILMN_2611022 | Bcl11b    | 1.468135 | 0.78712  | 1.446169 | 0.659049 | 7.02859  | 19.87157 | 7.11E-06 | 0.000859 | 6.103234 | 7.57137  | 6.890354 |
| ILMN_1250469 | Bcl9l     | 1.203905 | 1.20678  | 1.532746 | 0.325967 | 6.752339 | 19.86653 | 7.12E-06 | 0.000859 | 5.766481 | 6.970386 | 6.97326  |
| ILMN_2725781 | Abcg5     | 0.98128  | 0.935494 | 0.750949 | -0.18455 | 12.99562 | 19.85157 | 7.15E-06 | 0.000859 | 12.32869 | 13.30997 | 13.26418 |
| ILMN_2745993 | Ece1      | 0.899657 | 0.893472 | 0.976051 | 0.082579 | 9.272693 | 19.72226 | 7.47E-06 | 0.000882 | 8.580398 | 9.480055 | 9.47387  |
| ILMN_3014965 | 2610507B1 | 0.992337 | 0.841222 | 1.136298 | 0.295077 | 10.86601 | 19.69397 | 7.54E-06 | 0.000882 | 10.12355 | 11.11589 | 10.96477 |
| ILMN_1229553 | Igsf3     | 0.719161 | 0.770535 | 1.003021 | 0.232486 | 8.518963 | 19.69227 | 7.55E-06 | 0.000882 | 7.895784 | 8.614945 | 8.666319 |
| ILMN_2664129 | Hist1h4h  | -0.98039 | -0.3209  | -0.40872 | -0.08783 | 7.207742 | 19.69057 | 7.55E-06 | 0.000882 | 7.635244 | 6.654857 | 7.314348 |
| ILMN_2709397 | Eif2ak1   | 0.849713 | 0.812933 | 0.717219 | -0.09571 | 9.831292 | 19.64908 | 7.66E-06 | 0.000888 | 9.236326 | 10.08604 | 10.04926 |
| ILMN_2638061 | 0610009M  | 0.19839  | 0.848682 | 0.877064 | 0.028382 | 7.071563 | 19.61878 | 7.74E-06 | 0.000888 | 6.590529 | 6.788919 | 7.439211 |
| ILMN_2923707 | Tmem141   | -0.93534 | -0.9462  | -0.79632 | 0.149886 | 6.638035 | 19.61381 | 7.75E-06 | 0.000888 | 7.3075   | 6.372157 | 6.361298 |
| ILMN_2824723 | Fxc1      | -0.94756 | -0.7053  | -0.91216 | -0.20686 | 9.285389 | 19.56122 | 7.89E-06 | 0.000894 | 9.926642 | 8.979085 | 9.221342 |
| ILMN_1235054 | Zcchc14   | 0.960334 | 0.818386 | 0.845085 | 0.026699 | 6.699557 | 19.5553  | 7.91E-06 | 0.000894 | 6.043606 | 7.00394  | 6.861991 |
| ILMN_2791410 | Icmt      | 0.789047 | 0.694706 | 0.954354 | 0.259647 | 7.744335 | 19.48235 | 8.11E-06 | 0.00091  | 7.134808 | 7.923855 | 7.829514 |
| ILMN_2616792 | Thrap6    | -0.75502 | -0.50198 | -0.60556 | -0.10359 | 9.938659 | 19.45361 | 8.19E-06 | 0.000912 | 10.4043  | 9.649283 | 9.902319 |
| ILMN_1246758 | 4632413K1 | 0.800883 | 0.564926 | 0.711174 | 0.146248 | 10.45173 | 19.43974 | 8.23E-06 | 0.000912 | 9.932481 | 10.73336 | 10.49741 |
| ILMN_3144164 | Irs2      | 1.808751 | 1.297488 | 1.469007 | 0.171519 | 6.764787 | 19.42266 | 8.27E-06 | 0.000912 | 5.620975 | 7.429726 | 6.918463 |
| ILMN_2719784 | Ncoa1     | 1.149786 | 0.761766 | 1.168398 | 0.406632 | 6.92129  | 19.40391 | 8.33E-06 | 0.000912 | 6.151302 | 7.301088 | 6.913069 |
| ILMN_2769393 | 2210008I1 | 0.564005 | 0.590876 | 0.944345 | 0.353469 | 9.58927  | 19.32793 | 8.55E-06 | 0.000924 | 9.064463 | 9.628468 | 9.655339 |
| ILMN_2702197 | Pcbp1     | 1.107539 | 0.479518 | 0.505842 | 0.026323 | 10.48065 | 19.30223 | 8.62E-06 | 0.000924 | 9.957422 | 11.06496 | 10.43694 |
| ILMN_2792089 | Srebf1    | 2.910583 | 3.200975 | 1.386988 | -1.81399 | 7.550546 | 19.29484 | 8.64E-06 | 0.000924 | 5.67591  | 8.586493 | 8.876885 |
| ILMN_2669958 | Bcas3     | 1.014532 | 0.767613 | 0.900174 | 0.132561 | 8.741431 | 19.29318 | 8.65E-06 | 0.000924 | 8.070852 | 9.085383 | 8.838465 |
| ILMN_2744337 | Cd47      | 1.181792 | 1.160234 | 1.305928 | 0.145694 | 8.540629 | 19.27304 | 8.71E-06 | 0.000924 | 7.628641 | 8.810433 | 8.788875 |
| ILMN_1221405 | Crk       | -0.95243 | -0.5746  | -0.9562  | -0.3816  | 5.507362 | 19.2437  | 8.80E-06 | 0.000928 | 6.12817  | 5.175736 | 5.553569 |
| ILMN_2938893 | Smad3     | 1.06528  | 0.899545 | 0.997997 | 0.098452 | 7.106932 | 19.20203 | 8.92E-06 | 0.000936 | 6.366227 | 7.431506 | 7.265772 |
| ILMN_1219918 | 2310011J0 | -1.12299 | -0.73413 | -0.81689 | -0.08276 | 7.267628 | 19.17738 | 9.00E-06 | 0.000938 | 7.936132 | 6.813141 | 7.202001 |
| ILMN_2601453 | A130092J0 | 0.950964 | 0.983136 | 1.042045 | 0.058909 | 9.565198 | 19.07201 | 9.33E-06 | 0.000967 | 8.821162 | 9.772125 | 9.804298 |
| ILMN_3000536 | 1110030J0 | -0.89264 | -0.6382  | -0.95461 | -0.31641 | 8.357454 | 19.03428 | 9.46E-06 | 0.000974 | 8.978816 | 8.086179 | 8.340616 |
| ILMN_3114641 | Pik3r1    | 1.161104 | 0.702799 | 1.261061 | 0.558263 | 9.388383 | 18.91834 | 9.85E-06 | 0.000994 | 8.607142 | 9.768247 | 9.309941 |
| ILMN_2655929 | 2700055KC | -1.83886 | -1.19039 | -0.69375 | 0.496642 | 7.410723 | 18.90185 | 9.90E-06 | 0.000994 | 8.341471 | 6.502612 | 7.151084 |
| ILMN_2782503 | Trim8     | 0.642326 | 0.628749 | 0.803139 | 0.17439  | 9.653869 | 18.9013  | 9.90E-06 | 0.000994 | 9.135316 | 9.777642 | 9.764065 |
| ILMN_2671708 | Dnajc5    | 0.979388 | 1.000067 | 1.186121 | 0.186054 | 9.060771 | 18.89963 | 9.91E-06 | 0.000994 | 8.269377 | 9.248764 | 9.269444 |
| ILMN_2987984 | S100a13   | -1.17556 | -0.72592 | -0.7979  | -0.07198 | 8.574382 | 18.891   | 9.94E-06 | 0.000994 | 9.249226 | 8.07367  | 8.523304 |

|              |           |          |          |          |          |          |          |          |          |          |          |          |
|--------------|-----------|----------|----------|----------|----------|----------|----------|----------|----------|----------|----------|----------|
| ILMN_3120652 | 1810031KC | 1.207721 | 0.903962 | 0.951429 | 0.047468 | 10.09505 | 18.87631 | 9.99E-06 | 0.000994 | 9.329276 | 10.537   | 10.23324 |
| ILMN_1218934 | Rad52b    | -0.87199 | -0.47483 | -0.58697 | -0.11214 | 9.083379 | 18.79654 | 1.03E-05 | 0.001004 | 9.566828 | 8.694838 | 9.091993 |
| ILMN_2666190 | Rnpepl1   | 0.803787 | 0.602351 | 0.988708 | 0.386357 | 12.21958 | 18.7867  | 1.03E-05 | 0.001004 | 11.62086 | 12.42465 | 12.22321 |
| ILMN_2766580 | Noc4      | -1.17401 | -0.80801 | -1.13917 | -0.33116 | 8.327291 | 18.77769 | 1.03E-05 | 0.001004 | 9.10759  | 7.933576 | 8.299578 |
| ILMN_3036708 | Gats      | 1.317881 | 1.280747 | 1.576273 | 0.295526 | 7.4409   | 18.77152 | 1.04E-05 | 0.001004 | 6.397175 | 7.715056 | 7.677922 |
| ILMN_2491654 | Ubap2     | 1.13874  | 0.625147 | 1.080829 | 0.455682 | 9.233583 | 18.76673 | 1.04E-05 | 0.001004 | 8.522404 | 9.661144 | 9.147551 |
| ILMN_2639805 | Ogdh      | 0.986123 | 0.572728 | 0.895421 | 0.322693 | 10.98802 | 18.67761 | 1.07E-05 | 0.001016 | 10.37445 | 11.36058 | 10.94718 |
| ILMN_3130768 | Gcap14    | 1.232677 | 1.18719  | 0.961858 | -0.22533 | 10.36365 | 18.67146 | 1.07E-05 | 0.001016 | 9.518214 | 10.75089 | 10.7054  |
| ILMN_2629266 | Por       | 1.717489 | 1.586172 | 0.890593 | -0.69558 | 6.009512 | 18.67009 | 1.07E-05 | 0.001016 | 4.960948 | 6.678438 | 6.547121 |
| ILMN_2667219 | Timm8b    | -0.80077 | -0.72412 | -0.9522  | -0.22808 | 11.77131 | 18.65892 | 1.08E-05 | 0.001016 | 12.39058 | 11.58982 | 11.66647 |
| ILMN_2632942 | Sumo1     | -0.49685 | -0.67846 | -1.05799 | -0.37953 | 8.990505 | 18.64947 | 1.08E-05 | 0.001016 | 9.548829 | 9.051976 | 8.870373 |
| ILMN_1244161 | Nme4      | -0.85447 | -0.70571 | -0.77559 | -0.06988 | 6.014627 | 18.6406  | 1.09E-05 | 0.001016 | 6.59857  | 5.744104 | 5.892858 |
| ILMN_2681906 | Copa      | 1.022536 | 0.703705 | 0.786797 | 0.083092 | 10.42812 | 18.60357 | 1.10E-05 | 0.001024 | 9.799857 | 10.82239 | 10.50356 |
| ILMN_2840091 | Ugcg      | 0.818429 | 0.896676 | 0.81626  | -0.08042 | 11.43404 | 18.55527 | 1.12E-05 | 0.001032 | 10.8012  | 11.61963 | 11.69787 |
| ILMN_2945066 | Nat5      | -0.90265 | -0.64371 | -0.9243  | -0.28059 | 9.812056 | 18.54165 | 1.12E-05 | 0.001032 | 10.42972 | 9.527071 | 9.786013 |
| ILMN_2780392 | Slc7a8    | 1.306774 | 1.127648 | 1.050301 | -0.07735 | 7.422582 | 18.53435 | 1.13E-05 | 0.001032 | 6.551401 | 7.858176 | 7.679049 |
| ILMN_2698443 | Efnb1     | 0.761918 | 0.78937  | 0.893346 | 0.103976 | 9.286051 | 18.51577 | 1.13E-05 | 0.001034 | 8.674892 | 9.43681  | 9.464262 |
| ILMN_2609052 | 6720463E0 | 1.119293 | 0.700486 | 0.622287 | -0.0782  | 7.927581 | 18.44601 | 1.16E-05 | 0.001048 | 7.317064 | 8.436357 | 8.01755  |
| ILMN_1229589 | Coq6      | 0.201429 | -0.30822 | -0.70445 | -0.39623 | 7.00034  | 18.43511 | 1.17E-05 | 0.001048 | 7.203149 | 7.404578 | 6.89493  |
| ILMN_2914957 | Znhit3    | -1.27777 | -0.56415 | -1.05848 | -0.49433 | 8.713407 | 18.43412 | 1.17E-05 | 0.001048 | 9.438507 | 8.16074  | 8.874356 |
| ILMN_1233160 | 1810015M  | -1.17596 | -0.93248 | -0.94222 | -0.00975 | 8.988962 | 18.39645 | 1.18E-05 | 0.001056 | 9.751627 | 8.575668 | 8.81915  |
| ILMN_2439638 | Traf3     | 0.984325 | 0.806044 | 1.072961 | 0.266917 | 7.174713 | 18.37258 | 1.19E-05 | 0.00106  | 6.45888  | 7.443205 | 7.264924 |
| ILMN_2683822 | Rnf138    | -0.5321  | -0.65234 | -0.97373 | -0.32139 | 5.771248 | 18.32642 | 1.21E-05 | 0.001072 | 6.310789 | 5.778689 | 5.65845  |
| ILMN_2803627 | Tmem126a  | -0.84485 | -0.73253 | -0.94481 | -0.21228 | 10.574   | 18.30981 | 1.22E-05 | 0.001073 | 11.20455 | 10.3597  | 10.47202 |
| ILMN_2879746 | Lasp1     | 1.054115 | 0.8256   | 1.067251 | 0.241651 | 12.75752 | 18.23855 | 1.25E-05 | 0.001091 | 12.02077 | 13.07489 | 12.84637 |
| ILMN_1219577 | Arl1      | -1.08766 | -0.71412 | -0.54292 | 0.171193 | 10.94679 | 18.19802 | 1.27E-05 | 0.001091 | 11.53297 | 10.44531 | 10.81885 |
| ILMN_3163044 | 2810409HC | -0.3687  | -0.64285 | -0.91656 | -0.2737  | 8.471995 | 18.1865  | 1.28E-05 | 0.001091 | 8.954024 | 8.58532  | 8.311171 |
| ILMN_1259737 | Dcun1d4   | 1.084724 | 0.913773 | 0.71064  | -0.20313 | 7.436758 | 18.17716 | 1.28E-05 | 0.001091 | 6.759474 | 7.844198 | 7.673247 |
| ILMN_2805071 | Ap4s1     | -0.80312 | -0.6337  | -0.7309  | -0.0972  | 9.762572 | 18.16786 | 1.28E-05 | 0.001091 | 10.3045  | 9.501384 | 9.6708   |
| ILMN_2881263 | Aifm1     | 0.960102 | 0.324535 | 0.303957 | -0.02058 | 8.154848 | 18.16628 | 1.28E-05 | 0.001091 | 7.7577   | 8.717801 | 8.082235 |
| ILMN_2613696 | 1100001D1 | 0.865209 | 0.573927 | 0.77115  | 0.197223 | 9.65919  | 18.16357 | 1.29E-05 | 0.001091 | 9.106619 | 9.971828 | 9.680546 |
| ILMN_1247240 | D11ErtD70 | -0.75812 | -0.66028 | -0.78585 | -0.12558 | 7.64536  | 18.15301 | 1.29E-05 | 0.001091 | 8.196422 | 7.438303 | 7.536146 |
| ILMN_3134598 | 4833426J0 | 1.078055 | 0.921793 | 1.319433 | 0.39764  | 9.474525 | 18.1266  | 1.30E-05 | 0.001093 | 8.644705 | 9.722761 | 9.566498 |
| ILMN_3003308 | PsmD10    | -0.77991 | -0.60344 | -0.74456 | -0.14112 | 10.22577 | 18.12153 | 1.31E-05 | 0.001093 | 10.75774 | 9.977837 | 10.1543  |
| ILMN_1239411 | 6430510M  | 0.685354 | 0.663844 | 1.229145 | 0.565301 | 5.83813  | 18.0953  | 1.32E-05 | 0.001098 | 5.193544 | 5.878898 | 5.857388 |

|              |           |          |          |          |          |          |          |          |          |          |          |          |
|--------------|-----------|----------|----------|----------|----------|----------|----------|----------|----------|----------|----------|----------|
| ILMN_1255496 | 3110040N1 | -0.79192 | -0.78668 | -1.05658 | -0.26991 | 8.147913 | 18.06065 | 1.33E-05 | 0.001106 | 8.806706 | 8.01479  | 8.020031 |
| ILMN_2498173 | Uros      | -0.74922 | -0.807   | -0.85127 | -0.04427 | 6.198055 | 18.02879 | 1.35E-05 | 0.001114 | 6.799927 | 6.050708 | 5.992926 |
| ILMN_2747345 | Mrps18c   | -1.21916 | -0.75347 | -0.71752 | 0.035953 | 9.57538  | 17.96632 | 1.38E-05 | 0.001132 | 10.24792 | 9.02876  | 9.494444 |
| ILMN_2763679 | Sipa1l1   | 1.016734 | 0.623167 | 0.95734  | 0.334173 | 9.012121 | 17.95706 | 1.39E-05 | 0.001132 | 8.362811 | 9.379545 | 8.985978 |
| ILMN_2686187 | 1600013P1 | -0.97742 | -0.87374 | -0.58376 | 0.289986 | 6.767059 | 17.90981 | 1.41E-05 | 0.001147 | 7.375789 | 6.398372 | 6.502044 |
| ILMN_1216308 | Zfp574    | 0.753    | 0.598849 | 0.756771 | 0.157922 | 8.315505 | 17.86046 | 1.43E-05 | 0.001162 | 7.78835  | 8.54135  | 8.387199 |
| ILMN_1255644 | Drpla     | 0.931847 | 0.952278 | 1.034079 | 0.081801 | 6.288362 | 17.83478 | 1.45E-05 | 0.001167 | 5.558812 | 6.490659 | 6.511089 |
| ILMN_2936199 | Trim32    | 1.127999 | 0.635769 | 0.915921 | 0.280152 | 9.079538 | 17.79672 | 1.47E-05 | 0.001178 | 8.409616 | 9.537615 | 9.045385 |
| ILMN_2940559 | Gbf1      | 1.124985 | 0.729874 | 0.89261  | 0.162736 | 9.174726 | 17.75151 | 1.49E-05 | 0.001192 | 8.487859 | 9.612844 | 9.217733 |
| ILMN_1249836 | SEPT15    | -0.78238 | -0.46003 | -0.78225 | -0.32222 | 11.62409 | 17.70702 | 1.52E-05 | 0.001204 | 12.13025 | 11.34787 | 11.67022 |
| ILMN_2760840 | Ppp1r8    | -0.60686 | -0.57447 | -0.81141 | -0.23694 | 8.170135 | 17.69589 | 1.52E-05 | 0.001204 | 8.668319 | 8.061456 | 8.093854 |
| ILMN_3135566 | Tsc2      | 0.868828 | 0.635657 | 0.915463 | 0.279805 | 9.4521   | 17.68667 | 1.53E-05 | 0.001204 | 8.847113 | 9.715941 | 9.48277  |
| ILMN_1229741 | Rap1b     | -0.84874 | -0.32769 | -0.27135 | 0.056344 | 11.19912 | 17.65378 | 1.55E-05 | 0.001213 | 11.56107 | 10.71233 | 11.23337 |
| ILMN_1227218 | C230075L1 | 0.890431 | 0.828815 | 1.042522 | 0.213707 | 9.030715 | 17.53481 | 1.62E-05 | 0.00126  | 8.340273 | 9.230704 | 9.169088 |
| ILMN_2634689 | Itgb4     | 0.914774 | 1.038953 | 1.223073 | 0.18412  | 8.977217 | 17.5245  | 1.62E-05 | 0.00126  | 8.183017 | 9.097792 | 9.22197  |
| ILMN_1221940 | 8430419L0 | 1.168472 | 0.854991 | 0.734744 | -0.12025 | 6.473307 | 17.51477 | 1.63E-05 | 0.00126  | 5.783755 | 6.952227 | 6.638746 |
| ILMN_2755730 | Nip7      | -0.71912 | -0.64565 | -1.0328  | -0.38715 | 8.640469 | 17.49594 | 1.64E-05 | 0.001263 | 9.239863 | 8.52074  | 8.594213 |
| ILMN_2841840 | Mrps10    | -0.89392 | -0.65307 | -1.02098 | -0.36791 | 8.175899 | 17.45088 | 1.67E-05 | 0.001273 | 8.817893 | 7.923969 | 8.164822 |
| ILMN_2724235 | Myo18a    | 1.118918 | 0.765882 | 1.07971  | 0.313828 | 8.617408 | 17.44942 | 1.67E-05 | 0.001273 | 7.876281 | 8.995198 | 8.642163 |
| ILMN_2668114 | Magoh     | -0.9035  | -0.713   | -0.93109 | -0.2181  | 9.214496 | 17.42923 | 1.68E-05 | 0.001273 | 9.851393 | 8.947893 | 9.138396 |
| ILMN_1257061 | 1110030J0 | -0.95914 | -0.75547 | -0.93359 | -0.17813 | 9.014901 | 17.42268 | 1.69E-05 | 0.001273 | 9.676951 | 8.717813 | 8.921485 |
| ILMN_2681057 | Phca      | -0.88595 | -0.57476 | -0.77315 | -0.19839 | 9.241115 | 17.40411 | 1.70E-05 | 0.001273 | 9.799581 | 8.913633 | 9.22482  |
| ILMN_2588411 | Grina     | 0.618915 | 0.738705 | 0.789715 | 0.051009 | 12.76316 | 17.39701 | 1.70E-05 | 0.001273 | 12.22633 | 12.84524 | 12.96503 |
| ILMN_2723907 | Med6      | -0.74434 | -0.53151 | -0.61982 | -0.08831 | 9.285099 | 17.38487 | 1.71E-05 | 0.001273 | 9.759018 | 9.014674 | 9.227505 |
| ILMN_1248637 | 2510027N1 | -0.8201  | -0.50462 | -0.5543  | -0.04968 | 11.00081 | 17.37342 | 1.72E-05 | 0.001273 | 11.47056 | 10.65046 | 10.96595 |
| ILMN_2700448 | 4932439K1 | 0.782231 | 0.746647 | 0.845939 | 0.099292 | 11.1575  | 17.36926 | 1.72E-05 | 0.001273 | 10.56379 | 11.34602 | 11.31044 |
| ILMN_2760671 | D030056L2 | -0.97978 | -0.75713 | -0.73476 | 0.022377 | 9.789798 | 17.34703 | 1.73E-05 | 0.001274 | 10.40772 | 9.427934 | 9.650582 |
| ILMN_2673889 | Mcm7      | 0.940535 | -0.06367 | -0.02464 | 0.03903  | 6.238584 | 17.32802 | 1.75E-05 | 0.001274 | 6.025526 | 6.966061 | 5.96186  |
| ILMN_2848548 | Pts       | -0.99548 | -0.59104 | -0.73647 | -0.14543 | 10.07156 | 17.32727 | 1.75E-05 | 0.001274 | 10.65231 | 9.656832 | 10.06127 |
| ILMN_1255511 | 1110037N0 | 1.056018 | 0.771363 | 0.995737 | 0.224374 | 8.688544 | 17.32259 | 1.75E-05 | 0.001274 | 7.982764 | 9.038782 | 8.754127 |
| ILMN_2593496 | Got2      | 1.325716 | 0.827351 | 0.676792 | -0.15056 | 11.49899 | 17.23811 | 1.80E-05 | 0.0013   | 10.79153 | 12.11725 | 11.61888 |
| ILMN_2712578 | BC013481  | 1.462138 | 0.84817  | 0.850361 | 0.00219  | 7.246496 | 17.23013 | 1.81E-05 | 0.0013   | 6.456329 | 7.918467 | 7.304499 |
| ILMN_1254684 | C87860    | -1.02948 | -1.23435 | -1.24047 | -0.00612 | 5.281441 | 17.22394 | 1.81E-05 | 0.0013   | 6.157516 | 5.128036 | 4.923166 |
| ILMN_2857086 | Tra2a     | -0.23083 | -0.57399 | -0.84133 | -0.26734 | 9.938853 | 17.21932 | 1.82E-05 | 0.0013   | 10.35039 | 10.11956 | 9.776402 |
| ILMN_3150233 | Abca3     | 0.991135 | 0.809065 | 1.031339 | 0.222274 | 8.232255 | 17.21336 | 1.82E-05 | 0.0013   | 7.52437  | 8.515504 | 8.333435 |

|              |           |          |          |          |          |          |          |          |          |          |          |          |
|--------------|-----------|----------|----------|----------|----------|----------|----------|----------|----------|----------|----------|----------|
| ILMN_2703844 | Eef1e1    | -0.74155 | -0.78285 | -1.19625 | -0.4134  | 7.884995 | 17.17508 | 1.85E-05 | 0.001313 | 8.565158 | 7.823604 | 7.782309 |
| ILMN_1257485 | 2610029G2 | -0.2091  | -0.50368 | -0.85226 | -0.34858 | 8.717224 | 17.14873 | 1.87E-05 | 0.001321 | 9.108488 | 8.899383 | 8.604804 |
| ILMN_2837865 | Lsm3      | -0.92149 | -0.76319 | -0.88956 | -0.12637 | 10.37757 | 17.12141 | 1.89E-05 | 0.001325 | 11.02113 | 10.09964 | 10.25794 |
| ILMN_2750402 | D7Rp2e    | -0.29403 | -0.62838 | -0.92337 | -0.29499 | 8.95539  | 17.11481 | 1.89E-05 | 0.001325 | 9.416837 | 9.122808 | 8.788452 |
| ILMN_3139875 | Acot1     | 2.968899 | 3.437789 | 1.129237 | -2.30855 | 10.48069 | 17.10775 | 1.90E-05 | 0.001325 | 8.596705 | 11.5656  | 12.03449 |
| ILMN_2797689 | Churc1    | -0.84953 | -0.79547 | -1.23129 | -0.43582 | 10.05817 | 17.09211 | 1.91E-05 | 0.001327 | 10.77724 | 9.927709 | 9.98177  |
| ILMN_3157568 | Bcl2l11   | 0.903167 | 0.838927 | 0.993991 | 0.155064 | 6.628224 | 17.0394  | 1.94E-05 | 0.001349 | 5.944203 | 6.84737  | 6.78313  |
| ILMN_2625299 | Mg29      | 1.135879 | 0.781245 | 0.729205 | -0.05204 | 7.203562 | 17.0208  | 1.96E-05 | 0.001353 | 6.54198  | 7.677859 | 7.323225 |
| ILMN_2769680 | 0610039N1 | 2.01655  | 2.189183 | 0.803175 | -1.38601 | 11.78149 | 16.97027 | 2.00E-05 | 0.001367 | 10.52926 | 12.54581 | 12.71844 |
| ILMN_1228501 | Tob2      | 1.222918 | 0.778032 | 1.06098  | 0.282948 | 6.670624 | 16.95334 | 2.01E-05 | 0.001367 | 5.905141 | 7.128059 | 6.683173 |
| ILMN_2679532 | 1110049G1 | -0.83248 | -0.48944 | -0.88031 | -0.39088 | 9.277396 | 16.95305 | 2.01E-05 | 0.001367 | 9.827954 | 8.995471 | 9.338517 |
| ILMN_2731237 | D8Ertd82e | 1.001802 | 1.076349 | 0.958134 | -0.11822 | 6.266879 | 16.95076 | 2.01E-05 | 0.001367 | 5.507808 | 6.50961  | 6.584157 |
| ILMN_2525423 | BC037006  | 1.068097 | 0.971517 | 0.982022 | 0.010505 | 7.36196  | 16.94173 | 2.02E-05 | 0.001367 | 6.606551 | 7.674648 | 7.578068 |
| ILMN_2641705 | Cdc2l2    | 0.844946 | 0.549231 | 0.661233 | 0.112002 | 9.975393 | 16.90973 | 2.04E-05 | 0.001371 | 9.46154  | 10.30649 | 10.01077 |
| ILMN_1219682 | 4932408F1 | 0.911231 | 0.892629 | 1.017309 | 0.12468  | 6.242408 | 16.90709 | 2.04E-05 | 0.001371 | 5.537116 | 6.448348 | 6.429745 |
| ILMN_2850170 | Zc3hdc3   | 0.869304 | 0.831756 | 1.158174 | 0.326418 | 8.641704 | 16.90027 | 2.05E-05 | 0.001371 | 7.926895 | 8.796199 | 8.758652 |
| ILMN_1258453 | Vps53     | 1.025504 | 0.534486 | 0.608444 | 0.073958 | 9.048325 | 16.892   | 2.06E-05 | 0.001371 | 8.506216 | 9.53172  | 9.040702 |
| ILMN_2912239 | Hsd17b4   | 1.084767 | 0.800079 | 0.598697 | -0.20138 | 12.57861 | 16.85321 | 2.09E-05 | 0.001382 | 11.95773 | 13.04249 | 12.75781 |
| ILMN_3136056 | Sca2      | 1.007973 | 0.600918 | 0.861635 | 0.260717 | 8.885106 | 16.84589 | 2.09E-05 | 0.001382 | 8.267474 | 9.275448 | 8.868392 |
| ILMN_2690306 | 2610028L1 | -0.6014  | -0.56352 | -0.91313 | -0.3496  | 8.405362 | 16.841   | 2.10E-05 | 0.001382 | 8.924874 | 8.323473 | 8.361351 |
| ILMN_2645620 | Bcap29    | -0.80776 | -0.47473 | -0.75671 | -0.28198 | 7.671814 | 16.82253 | 2.11E-05 | 0.001383 | 8.181615 | 7.373855 | 7.706882 |
| ILMN_2815545 | 4632411B1 | 0.7613   | 0.71092  | 0.739385 | 0.028465 | 8.883724 | 16.8202  | 2.11E-05 | 0.001383 | 8.330823 | 9.092123 | 9.041743 |
| ILMN_2710139 | Ppargc1a  | 0.79234  | 0.381946 | 0.857711 | 0.475765 | 7.167218 | 16.80194 | 2.13E-05 | 0.001387 | 6.659219 | 7.451559 | 7.041164 |
| ILMN_2701824 | BC060631  | 1.15559  | 0.469768 | 1.040889 | 0.571121 | 7.819073 | 16.78989 | 2.14E-05 | 0.001388 | 7.152511 | 8.3081   | 7.622279 |
| ILMN_2478523 | Txn14     | -0.70632 | -0.72175 | -0.94102 | -0.21927 | 9.801267 | 16.70008 | 2.21E-05 | 0.001426 | 10.39354 | 9.687221 | 9.671788 |
| ILMN_2604794 | Atp5e     | -1.44786 | -0.87311 | -1.12264 | -0.24952 | 6.883213 | 16.69936 | 2.21E-05 | 0.001426 | 7.744116 | 6.296257 | 6.871002 |
| ILMN_2644606 | Noc4      | -0.91944 | -0.54998 | -0.96353 | -0.41355 | 8.768843 | 16.66414 | 2.24E-05 | 0.001435 | 9.377081 | 8.457638 | 8.827103 |
| ILMN_2589477 | Dars      | 0.536874 | -0.44016 | -0.52246 | -0.0823  | 7.977361 | 16.66349 | 2.24E-05 | 0.001435 | 8.083796 | 8.620669 | 7.64364  |
| ILMN_2645719 | Al316787  | -0.95063 | -0.54938 | -0.80062 | -0.25124 | 8.316717 | 16.64442 | 2.26E-05 | 0.001437 | 8.891876 | 7.941243 | 8.342493 |
| ILMN_2679094 | Map3k7ip2 | 0.586384 | 0.727994 | 0.905648 | 0.177654 | 9.101011 | 16.633   | 2.27E-05 | 0.001437 | 8.546005 | 9.132389 | 9.273998 |
| ILMN_2766262 | Pfdn5     | -0.70084 | -0.57294 | -0.72285 | -0.14991 | 12.1964  | 16.63254 | 2.27E-05 | 0.001437 | 12.69556 | 11.99472 | 12.12262 |
| ILMN_2661650 | Dp1l1     | 1.063517 | 0.889093 | 0.757979 | -0.13111 | 11.3161  | 16.61501 | 2.28E-05 | 0.001437 | 10.63845 | 11.70197 | 11.52754 |
| ILMN_2473374 | Zdhhc9    | 1.001285 | 0.873773 | 0.833792 | -0.03998 | 8.517803 | 16.61336 | 2.29E-05 | 0.001437 | 7.840591 | 8.841876 | 8.714364 |
| ILMN_1218612 | Txn14     | -0.68494 | -0.70604 | -0.98344 | -0.2774  | 9.471418 | 16.58002 | 2.32E-05 | 0.00145  | 10.06502 | 9.380087 | 9.358982 |
| ILMN_2753687 | B130017I0 | -1.07153 | -0.26423 | -0.00332 | 0.260906 | 7.216627 | 16.53953 | 2.35E-05 | 0.001468 | 7.551397 | 6.479863 | 7.28717  |



|              |           |          |          |          |          |          |          |          |          |          |          |          |
|--------------|-----------|----------|----------|----------|----------|----------|----------|----------|----------|----------|----------|----------|
| ILMN_3124364 | 2700038L1 | -0.59147 | -0.59458 | -0.73632 | -0.14174 | 10.55523 | 16.5215  | 2.37E-05 | 0.001472 | 11.03582 | 10.44435 | 10.44124 |
| ILMN_2744414 | Nme3      | -0.94418 | -0.5126  | -0.62122 | -0.10863 | 9.752538 | 16.45891 | 2.43E-05 | 0.001498 | 10.27204 | 9.32786  | 9.759442 |
| ILMN_1226195 | Bag3      | 0.875645 | 0.637814 | 0.597885 | -0.03993 | 10.50169 | 16.45689 | 2.43E-05 | 0.001498 | 9.973852 | 10.8495  | 10.61167 |
| ILMN_2825446 | Sdcbp2    | -1.02025 | -0.76255 | -0.51322 | 0.24933  | 11.91317 | 16.44259 | 2.44E-05 | 0.001498 | 12.48718 | 11.46693 | 11.72463 |
| ILMN_1253434 | 5730403M  | -0.95379 | -0.55394 | -0.64897 | -0.09503 | 7.556807 | 16.4298  | 2.45E-05 | 0.001498 | 8.095983 | 7.142193 | 7.542042 |
| ILMN_2875089 | 181002701 | -1.10956 | -0.36317 | -0.399   | -0.03583 | 12.21963 | 16.42474 | 2.46E-05 | 0.001498 | 12.68756 | 11.578   | 12.32439 |
| ILMN_3108004 | BC040758  | 0.859942 | 1.059992 | 1.127132 | 0.06714  | 12.268   | 16.42269 | 2.46E-05 | 0.001498 | 11.50624 | 12.36618 | 12.56623 |
| ILMN_1233187 | Max       | 0.700125 | 0.887036 | 0.851713 | -0.03532 | 11.82693 | 16.37528 | 2.51E-05 | 0.00152  | 11.21721 | 11.91733 | 12.10424 |
| ILMN_2781798 | Gm561     | -1.0385  | -0.63218 | -0.8013  | -0.16913 | 9.435568 | 16.34283 | 2.54E-05 | 0.001534 | 10.05356 | 9.015064 | 9.421385 |
| ILMN_2876775 | Pcbd2     | -0.90862 | -0.54316 | -0.62303 | -0.07987 | 10.8137  | 16.3184  | 2.56E-05 | 0.001543 | 11.33241 | 10.42378 | 10.78925 |
| ILMN_1250435 | 1700029G0 | 1.189059 | 1.100289 | 0.776945 | -0.32334 | 9.693798 | 16.28801 | 2.59E-05 | 0.001556 | 8.927225 | 10.11628 | 10.02751 |
| ILMN_2670778 | Kif1b     | 0.811639 | 0.745114 | 1.043788 | 0.298674 | 8.820804 | 16.25778 | 2.62E-05 | 0.001569 | 8.170669 | 8.982308 | 8.915783 |
| ILMN_1259488 | Mgea6     | 0.958698 | 0.92336  | 0.704583 | -0.21878 | 11.99689 | 16.2353  | 2.65E-05 | 0.001578 | 11.35023 | 12.30892 | 12.27359 |
| ILMN_3030148 | Dnajc19   | -0.81452 | -0.58527 | -0.9134  | -0.32813 | 7.357382 | 16.21987 | 2.66E-05 | 0.001582 | 7.935681 | 7.121159 | 7.350407 |
| ILMN_1219002 | Usmg5     | -1.1926  | -1.21266 | -1.13021 | 0.082451 | 5.73273  | 16.19807 | 2.68E-05 | 0.001588 | 6.616596 | 5.423995 | 5.403938 |
| ILMN_1233606 | Sfxn1     | 0.670205 | 0.366102 | 0.706793 | 0.340692 | 12.4286  | 16.19137 | 2.69E-05 | 0.001588 | 11.99282 | 12.66303 | 12.35893 |
| ILMN_3051252 | BC026590  | 0.95749  | 0.421748 | 0.681636 | 0.259888 | 6.857427 | 16.16302 | 2.72E-05 | 0.001597 | 6.342209 | 7.299699 | 6.763956 |
| ILMN_2710419 | Plec1     | 1.271771 | 1.333053 | 1.55364  | 0.220586 | 11.84309 | 16.15711 | 2.73E-05 | 0.001597 | 10.80347 | 12.07524 | 12.13652 |
| ILMN_1217329 | Sppl3     | 0.822898 | 0.747377 | 0.926856 | 0.179479 | 9.93459  | 16.15209 | 2.73E-05 | 0.001597 | 9.310308 | 10.13321 | 10.05768 |
| ILMN_2694080 | Psm10     | -0.85526 | -0.72159 | -0.80365 | -0.08207 | 8.723375 | 16.11188 | 2.78E-05 | 0.001617 | 9.3185   | 8.463241 | 8.596912 |
| ILMN_2449335 | Zfp162    | 0.932247 | 0.648948 | 0.772463 | 0.123514 | 6.305992 | 16.0803  | 2.81E-05 | 0.001629 | 5.717578 | 6.649825 | 6.366526 |
| ILMN_1249417 | Pdrg1     | -0.94523 | -0.61619 | -0.79916 | -0.18297 | 8.311654 | 16.07609 | 2.82E-05 | 0.001629 | 8.901797 | 7.956569 | 8.285611 |
| ILMN_2867696 | Cdc42bpb  | 0.630423 | 0.680586 | 0.855921 | 0.175335 | 9.00107  | 16.02022 | 2.88E-05 | 0.001656 | 8.459338 | 9.089761 | 9.139924 |
| ILMN_3006911 | Cyp4f13   | 0.874358 | 0.99138  | 0.821904 | -0.16948 | 11.05225 | 16.01742 | 2.88E-05 | 0.001656 | 10.38034 | 11.2547  | 11.37172 |
| ILMN_2821336 | Vps53     | 1.017826 | 0.527663 | 0.702172 | 0.174509 | 10.52102 | 15.96951 | 2.94E-05 | 0.001676 | 9.959109 | 10.97694 | 10.48677 |
| ILMN_3143246 | Ap2a1     | 0.751302 | 0.598764 | 0.693064 | 0.0943   | 7.196704 | 15.94821 | 2.96E-05 | 0.001676 | 6.685922 | 7.437224 | 7.284686 |
| ILMN_2684667 | 1810035L1 | -0.80763 | -0.6304  | -0.7987  | -0.1683  | 10.91653 | 15.94518 | 2.97E-05 | 0.001676 | 11.47572 | 10.66809 | 10.84532 |
| ILMN_1221592 | 1810029G2 | -1.22894 | -1.22946 | -1.23925 | -0.00979 | 7.923432 | 15.9408  | 2.97E-05 | 0.001676 | 8.847845 | 7.618901 | 7.618387 |
| ILMN_2798255 | Dscr5     | -0.96598 | -0.97042 | -0.9028  | 0.06762  | 8.659569 | 15.93727 | 2.97E-05 | 0.001676 | 9.369368 | 8.40339  | 8.398949 |
| ILMN_2446175 | Vps29     | -0.78995 | -0.58652 | -0.91491 | -0.32839 | 10.45493 | 15.93718 | 2.97E-05 | 0.001676 | 11.02777 | 10.23782 | 10.44125 |
| ILMN_2846731 | 1110059E2 | -1.05196 | -0.65902 | -0.70393 | -0.04491 | 9.616816 | 15.89332 | 3.03E-05 | 0.001697 | 10.22054 | 9.168582 | 9.561525 |
| ILMN_1247505 | Supt4h    | -0.89757 | -0.52696 | -0.76714 | -0.24018 | 7.888959 | 15.88526 | 3.04E-05 | 0.001697 | 8.436876 | 7.539306 | 7.909914 |
| ILMN_2977903 | BC057627  | 0.936516 | 0.84931  | 0.922945 | 0.073636 | 7.145379 | 15.88147 | 3.04E-05 | 0.001697 | 6.468187 | 7.404703 | 7.317496 |
| ILMN_1214823 | Tsc2      | 0.953461 | 0.709276 | 0.912722 | 0.203446 | 8.883042 | 15.86477 | 3.06E-05 | 0.001701 | 8.239177 | 9.192638 | 8.948453 |
| ILMN_2744237 | Grc2f     | -1.0049  | -1.15555 | -1.23291 | -0.07737 | 7.623574 | 15.85419 | 3.07E-05 | 0.001701 | 8.471915 | 7.467012 | 7.316367 |

|              |           |          |          |          |          |          |          |          |          |          |          |          |
|--------------|-----------|----------|----------|----------|----------|----------|----------|----------|----------|----------|----------|----------|
| ILMN_2633212 | Cox10     | 0.788164 | 0.197655 | 0.339256 | 0.141601 | 10.03437 | 15.85109 | 3.08E-05 | 0.001701 | 9.7031   | 10.49126 | 9.900755 |
| ILMN_2743494 | 2610028L1 | -0.79334 | -0.62293 | -0.95481 | -0.33188 | 7.526758 | 15.82524 | 3.11E-05 | 0.001713 | 8.119528 | 7.326192 | 7.496594 |
| ILMN_1234339 | LOC268663 | 0.806331 | 0.988934 | 1.148137 | 0.159204 | 10.71369 | 15.75946 | 3.19E-05 | 0.001753 | 9.97784  | 10.78417 | 10.96677 |
| ILMN_2747677 | 2310003L2 | -1.05188 | -0.82272 | -1.01557 | -0.19285 | 8.426779 | 15.74189 | 3.21E-05 | 0.001759 | 9.149322 | 8.097442 | 8.3266   |
| ILMN_3163302 | Mrps33    | -0.78285 | -0.54197 | -0.57845 | -0.03648 | 11.6664  | 15.72813 | 3.23E-05 | 0.001759 | 12.14221 | 11.35936 | 11.60024 |
| ILMN_3066763 | Arl4      | -0.55716 | -0.76058 | -1.06697 | -0.30638 | 9.173454 | 15.72127 | 3.24E-05 | 0.001759 | 9.769632 | 9.212476 | 9.009047 |
| ILMN_2718645 | Luzp1     | 0.816765 | 0.850612 | 1.033936 | 0.183324 | 9.366308 | 15.7187  | 3.24E-05 | 0.001759 | 8.69098  | 9.507745 | 9.541592 |
| ILMN_2653619 | Mgea6     | 0.910279 | 0.90365  | 0.611171 | -0.29248 | 12.38984 | 15.69425 | 3.28E-05 | 0.001771 | 11.78357 | 12.69384 | 12.68722 |
| ILMN_2731057 | Psme2     | -0.53282 | -0.50884 | -0.83367 | -0.32483 | 10.15024 | 15.68248 | 3.29E-05 | 0.001771 | 10.61907 | 10.08625 | 10.11023 |
| ILMN_2921303 | Tyms-ps   | -0.66804 | -0.663   | -1.09709 | -0.43409 | 8.758634 | 15.67845 | 3.30E-05 | 0.001771 | 9.365667 | 8.697629 | 8.702666 |
| ILMN_2617005 | Prlr      | 0.727108 | 0.718772 | 0.898483 | 0.17971  | 10.42398 | 15.64956 | 3.34E-05 | 0.001784 | 9.837886 | 10.56499 | 10.55666 |
| ILMN_2665161 | Myst2     | 0.848425 | 0.502548 | 0.577621 | 0.075073 | 7.253665 | 15.64548 | 3.34E-05 | 0.001784 | 6.771517 | 7.619942 | 7.274064 |
| ILMN_3105075 | 2610028L1 | -0.77255 | -0.7808  | -0.98714 | -0.20634 | 7.817208 | 15.62971 | 3.36E-05 | 0.00179  | 8.452329 | 7.67978  | 7.671532 |
| ILMN_1247198 | BC004728  | -0.73068 | -0.26154 | -0.24476 | 0.01678  | 11.40545 | 15.6151  | 3.38E-05 | 0.001795 | 11.71469 | 10.98401 | 11.45316 |
| ILMN_2704641 | 2610018L0 | -0.86184 | -0.72436 | -0.89218 | -0.16781 | 10.32936 | 15.58319 | 3.43E-05 | 0.001812 | 10.94896 | 10.08712 | 10.22459 |
| ILMN_2630328 | Psmg7     | -0.66925 | -0.49763 | -0.79021 | -0.29259 | 11.59473 | 15.57523 | 3.44E-05 | 0.001813 | 12.084   | 11.41476 | 11.58638 |
| ILMN_1243752 | 5730449L1 | -0.85771 | -0.61351 | -0.77622 | -0.16271 | 7.556807 | 15.56032 | 3.46E-05 | 0.001814 | 8.118665 | 7.260959 | 7.505158 |
| ILMN_1250928 | Atbf1     | 1.161024 | 0.96285  | 1.488117 | 0.525267 | 6.301932 | 15.55877 | 3.46E-05 | 0.001814 | 5.398935 | 6.559958 | 6.361784 |
| ILMN_1224736 | BC065120  | 1.433639 | 1.260862 | 1.637079 | 0.376217 | 6.333944 | 15.54223 | 3.48E-05 | 0.00182  | 5.251049 | 6.684688 | 6.511911 |
| ILMN_2854962 | Sgol1     | -0.74831 | -0.82042 | -1.0954  | -0.27499 | 6.989943 | 15.50162 | 3.54E-05 | 0.00184  | 7.655976 | 6.907663 | 6.835559 |
| ILMN_1242613 | BC060615  | 1.056048 | 1.042075 | 1.311144 | 0.269069 | 6.600765 | 15.49773 | 3.54E-05 | 0.00184  | 5.748449 | 6.804497 | 6.790523 |
| ILMN_1250771 | 2010316F0 | -1.21702 | -1.02971 | -1.01637 | 0.013337 | 8.907828 | 15.49284 | 3.55E-05 | 0.00184  | 9.723604 | 8.506583 | 8.693894 |
| ILMN_2937674 | Gse1      | 1.140624 | 1.022572 | 1.127521 | 0.104949 | 7.692658 | 15.46398 | 3.59E-05 | 0.001853 | 6.869979 | 8.010603 | 7.892551 |
| ILMN_2839303 | Dph4      | -0.77275 | -0.71416 | -0.9743  | -0.26014 | 8.240075 | 15.45922 | 3.60E-05 | 0.001853 | 8.855379 | 8.082626 | 8.141218 |
| ILMN_1253995 | Pxmp3     | -0.66914 | -0.66776 | -0.62951 | 0.038257 | 10.16157 | 15.45298 | 3.61E-05 | 0.001853 | 10.65317 | 9.984032 | 9.985407 |
| ILMN_1219136 | Vamp8     | -0.88595 | -0.3464  | -0.66435 | -0.31795 | 8.80372  | 15.41093 | 3.67E-05 | 0.00188  | 9.277896 | 8.391946 | 8.931494 |
| ILMN_2591381 | Ppm1b     | 0.680104 | 0.539303 | 0.656332 | 0.117029 | 11.13025 | 15.40033 | 3.69E-05 | 0.001882 | 10.66131 | 11.34141 | 11.20061 |
| ILMN_2772077 | Bok       | -0.91117 | 0.370349 | 0.376314 | 0.005966 | 9.892013 | 15.37018 | 3.73E-05 | 0.0019   | 9.93314  | 9.021967 | 10.30349 |
| ILMN_1248397 | Smarcd3   | -0.92553 | -0.58854 | -0.22008 | 0.368457 | 5.227312 | 15.34518 | 3.77E-05 | 0.001914 | 5.660849 | 4.735318 | 5.072313 |
| ILMN_2930203 | Ugt1a10   | 0.961356 | 0.789392 | 0.51217  | -0.27722 | 12.28993 | 15.33363 | 3.79E-05 | 0.001917 | 11.7242  | 12.68555 | 12.51359 |
| ILMN_2749958 | Cerk      | 0.084253 | 0.565693 | 0.785283 | 0.21959  | 9.578095 | 15.30512 | 3.83E-05 | 0.001934 | 9.219288 | 9.303541 | 9.784981 |
| ILMN_1235437 | Sca2      | 1.026806 | 0.605528 | 0.750263 | 0.144734 | 8.365517 | 15.28048 | 3.87E-05 | 0.001941 | 7.769868 | 8.796673 | 8.375396 |
| ILMN_2729374 | Slc35c2   | 1.089866 | 1.072546 | 0.897694 | -0.17485 | 10.88566 | 15.27311 | 3.88E-05 | 0.001941 | 10.12064 | 11.2105  | 11.19318 |
| ILMN_3097156 | AU040320  | 1.083785 | 1.086676 | 0.682347 | -0.40433 | 6.230546 | 15.27025 | 3.89E-05 | 0.001941 | 5.517345 | 6.601129 | 6.604021 |
| ILMN_2944150 | Sfrs4     | 0.90994  | 0.364987 | 0.634604 | 0.269617 | 8.682782 | 15.2673  | 3.89E-05 | 0.001941 | 8.205399 | 9.115339 | 8.570387 |

|              |           |          |          |          |          |          |          |          |          |          |          |          |
|--------------|-----------|----------|----------|----------|----------|----------|----------|----------|----------|----------|----------|----------|
| ILMN_2897476 | 1700034H1 | -0.75965 | -0.67701 | -0.88326 | -0.20625 | 8.65948  | 15.25494 | 3.91E-05 | 0.001942 | 9.23946  | 8.479812 | 8.562449 |
| ILMN_2971964 | Adam4     | -0.49971 | -0.83664 | -1.03475 | -0.19812 | 5.498139 | 15.25271 | 3.91E-05 | 0.001942 | 6.090914 | 5.591203 | 5.254278 |
| ILMN_3023451 | LOC433801 | -1.01335 | -0.40106 | -0.1749  | 0.226165 | 6.706323 | 15.24185 | 3.93E-05 | 0.001945 | 7.103653 | 6.0903   | 6.702588 |
| ILMN_1225764 | 170001801 | 1.749246 | 2.020081 | 1.085155 | -0.93493 | 10.02617 | 15.23503 | 3.94E-05 | 0.001945 | 8.812546 | 10.56179 | 10.83263 |
| ILMN_2755534 | Sepx1     | -0.74555 | -0.47405 | -0.68885 | -0.2148  | 8.290887 | 15.22571 | 3.96E-05 | 0.001947 | 8.767999 | 8.022445 | 8.293952 |
| ILMN_1254551 | 4933426M  | 0.850597 | 0.903189 | 0.741346 | -0.16184 | 9.173804 | 15.21098 | 3.98E-05 | 0.001953 | 8.550021 | 9.400618 | 9.45321  |
| ILMN_2669023 | Nola3     | -0.81971 | -0.62904 | -0.98068 | -0.35165 | 10.79695 | 15.18627 | 4.02E-05 | 0.001967 | 11.40431 | 10.5846  | 10.77527 |
| ILMN_3148543 | Src       | 0.647473 | 0.760397 | 1.043861 | 0.283464 | 8.326264 | 15.17967 | 4.03E-05 | 0.001967 | 7.713331 | 8.360804 | 8.473728 |
| ILMN_2714565 | Rrm2      | -0.34911 | -0.81017 | -0.92942 | -0.11925 | 6.583954 | 15.16571 | 4.06E-05 | 0.001973 | 7.106129 | 6.757016 | 6.295959 |
| ILMN_1248293 | Yap1      | 0.757166 | 0.641922 | 0.91223  | 0.270308 | 7.447784 | 15.14534 | 4.09E-05 | 0.001984 | 6.869955 | 7.627121 | 7.511877 |
| ILMN_1224421 | Cdipt     | 0.651991 | 0.71585  | 0.737595 | 0.021745 | 12.36708 | 15.13086 | 4.11E-05 | 0.00199  | 11.84072 | 12.49272 | 12.55657 |
| ILMN_2883961 | Sybl1     | -1.00368 | -0.67895 | -0.63249 | 0.046461 | 9.001116 | 15.0993  | 4.17E-05 | 0.002004 | 9.579899 | 8.576214 | 8.900946 |
| ILMN_2687745 | Pnpla2    | 0.673186 | 0.743242 | 0.898739 | 0.155497 | 11.32613 | 15.09196 | 4.18E-05 | 0.002004 | 10.74734 | 11.42053 | 11.49058 |
| ILMN_1215331 | Dicer1    | 0.896875 | 0.493155 | 0.712918 | 0.219763 | 6.664651 | 15.08604 | 4.19E-05 | 0.002004 | 6.138914 | 7.035789 | 6.632069 |
| ILMN_2799351 | Acot11    | 1.302324 | 0.897644 | 0.849426 | -0.04822 | 6.891448 | 15.08148 | 4.20E-05 | 0.002004 | 6.1291   | 7.431424 | 7.026743 |
| ILMN_2649083 | Clns1a    | 0.062558 | -0.39619 | -0.68107 | -0.28487 | 6.676982 | 15.05758 | 4.24E-05 | 0.002004 | 6.930657 | 6.993215 | 6.534466 |
| ILMN_1220786 | Crat      | 1.374408 | 0.871094 | 0.532584 | -0.33851 | 6.462229 | 15.05299 | 4.25E-05 | 0.002004 | 5.767708 | 7.142116 | 6.638801 |
| ILMN_2658407 | Elmo1     | 1.240132 | 1.189622 | 1.287449 | 0.097828 | 8.585124 | 15.04932 | 4.26E-05 | 0.002004 | 7.655823 | 8.895955 | 8.845445 |
| ILMN_2594821 | Myg1      | -0.43026 | -0.55069 | -0.73307 | -0.18238 | 8.153773 | 15.04855 | 4.26E-05 | 0.002004 | 8.582276 | 8.152021 | 8.031587 |
| ILMN_2976601 | Tfg       | 0.878903 | 0.577208 | 0.526934 | -0.05027 | 11.88336 | 15.04844 | 4.26E-05 | 0.002004 | 11.3876  | 12.2665  | 11.9648  |
| ILMN_2835012 | 5730449L1 | -0.83095 | -0.47621 | -0.79945 | -0.32324 | 7.401057 | 15.04134 | 4.27E-05 | 0.002004 | 7.927707 | 7.096761 | 7.4515   |
| ILMN_2610234 | Il15      | -1.16147 | -0.70996 | -0.64616 | 0.063805 | 9.256383 | 15.04051 | 4.27E-05 | 0.002004 | 9.885781 | 8.724313 | 9.175816 |
| ILMN_2821263 | Eps8l2    | 0.941658 | 0.689648 | 1.135798 | 0.44615  | 10.67933 | 15.0159  | 4.31E-05 | 0.002019 | 9.98755  | 10.92921 | 10.6772  |
| ILMN_1247257 | Gpd2      | 1.121172 | 0.691404 | 0.977487 | 0.286083 | 10.70401 | 14.97219 | 4.39E-05 | 0.00205  | 10.0065  | 11.12767 | 10.6979  |
| ILMN_2704777 | Cyp2d26   | 0.934984 | 1.157952 | 0.60429  | -0.55366 | 11.4484  | 14.95931 | 4.42E-05 | 0.00205  | 10.77409 | 11.70908 | 11.93204 |
| ILMN_2749669 | Nr1d1     | 0.767807 | -0.00331 | -0.33414 | -0.33083 | 5.064383 | 14.95909 | 4.42E-05 | 0.00205  | 4.956792 | 5.724599 | 4.953485 |
| ILMN_2724545 | Sbk       | 1.267077 | 1.212788 | 1.140405 | -0.07238 | 9.228941 | 14.94347 | 4.44E-05 | 0.002058 | 8.323874 | 9.590951 | 9.536662 |
| ILMN_2441921 | Trim56    | 0.823866 | 0.817893 | 1.147364 | 0.329471 | 5.672539 | 14.91856 | 4.49E-05 | 0.002069 | 4.975258 | 5.799124 | 5.793151 |
| ILMN_2998026 | Slc12a9   | 0.844573 | 0.764259 | 0.441819 | -0.32244 | 7.069213 | 14.91715 | 4.49E-05 | 0.002069 | 6.55655  | 7.401123 | 7.320809 |
| ILMN_2835053 | BC088983  | -0.73839 | -0.82385 | -1.00864 | -0.1848  | 6.273274 | 14.89273 | 4.54E-05 | 0.002081 | 6.915994 | 6.177602 | 6.092148 |
| ILMN_2900025 | Ndufs4    | -0.97952 | -0.93142 | -1.02318 | -0.09176 | 9.793631 | 14.89055 | 4.54E-05 | 0.002081 | 10.52716 | 9.547638 | 9.595742 |
| ILMN_1254409 | Sca1      | 0.961513 | 1.287404 | 1.537018 | 0.249613 | 6.990843 | 14.86962 | 4.58E-05 | 0.002091 | 6.04436  | 7.005873 | 7.331764 |
| ILMN_1254199 | Gaa       | 0.818146 | 0.859493 | 0.830018 | -0.02947 | 7.983788 | 14.86668 | 4.59E-05 | 0.002091 | 7.356873 | 8.17502  | 8.216366 |
| ILMN_3128784 | Sap30l    | 0.605483 | 0.611517 | 0.760374 | 0.148857 | 11.39088 | 14.85972 | 4.60E-05 | 0.002092 | 10.89653 | 11.50202 | 11.50805 |
| ILMN_3106053 | Slc39a7   | 0.858702 | 0.478714 | 0.505695 | 0.026981 | 9.027393 | 14.84909 | 4.62E-05 | 0.002095 | 8.566615 | 9.425316 | 9.045329 |

|              |           |          |          |          |          |          |          |          |          |          |          |          |
|--------------|-----------|----------|----------|----------|----------|----------|----------|----------|----------|----------|----------|----------|
| ILMN_2958016 | Fundc1    | -0.95257 | -0.89199 | -0.94022 | -0.04822 | 7.541433 | 14.82701 | 4.66E-05 | 0.002107 | 8.237628 | 7.285061 | 7.345633 |
| ILMN_2662990 | 4931440NC | 0.610703 | 0.719184 | 0.996131 | 0.276947 | 5.994496 | 14.82309 | 4.67E-05 | 0.002107 | 5.412992 | 6.023695 | 6.132176 |
| ILMN_1231390 | Mrpl3     | -0.26634 | -0.60342 | -0.76538 | -0.16196 | 8.319179 | 14.78573 | 4.75E-05 | 0.00213  | 8.727962 | 8.461627 | 8.124541 |
| ILMN_2707834 | Rpl13a    | -1.34658 | -0.51091 | -0.62652 | -0.11561 | 10.44197 | 14.78514 | 4.75E-05 | 0.00213  | 11.06297 | 9.71639  | 10.55206 |
| ILMN_1251236 | 4930438M  | 0.989165 | 0.380547 | 0.719903 | 0.339356 | 6.432314 | 14.7756  | 4.77E-05 | 0.002133 | 5.90991  | 6.899075 | 6.290457 |
| ILMN_2759669 | AI480556  | 0.745185 | 0.709307 | 0.849734 | 0.140427 | 7.487107 | 14.76663 | 4.78E-05 | 0.002135 | 6.91105  | 7.656236 | 7.620357 |
| ILMN_1246056 | Gngt2     | -1.02803 | -0.55641 | -0.61333 | -0.05692 | 8.388213 | 14.753   | 4.81E-05 | 0.002137 | 8.937655 | 7.909629 | 8.381244 |
| ILMN_2630993 | Ppap2b    | 0.879929 | 0.946083 | 1.161801 | 0.215718 | 10.38565 | 14.75257 | 4.81E-05 | 0.002137 | 9.638696 | 10.51862 | 10.58478 |
| ILMN_1232146 | 1700021C1 | -0.83936 | -0.65437 | -0.85766 | -0.20329 | 6.990191 | 14.74034 | 4.84E-05 | 0.002139 | 7.57804  | 6.738677 | 6.923668 |
| ILMN_2873180 | 1810030N2 | -0.79722 | -0.77493 | -0.84706 | -0.07213 | 10.25302 | 14.73821 | 4.84E-05 | 0.002139 | 10.85783 | 10.06061 | 10.0829  |
| ILMN_1223937 | Pum1      | 1.186177 | 0.720773 | 0.6458   | -0.07497 | 5.735591 | 14.72703 | 4.86E-05 | 0.00214  | 5.097403 | 6.28358  | 5.818177 |
| ILMN_1218441 | Slc23a3   | -0.98151 | -0.22773 | -0.5429  | -0.31516 | 8.349959 | 14.72504 | 4.87E-05 | 0.00214  | 8.787993 | 7.806487 | 8.56026  |
| ILMN_2523316 | Unc5b     | 0.437622 | 0.922059 | 1.068764 | 0.146706 | 7.111098 | 14.70521 | 4.91E-05 | 0.002152 | 6.503987 | 6.941608 | 7.426045 |
| ILMN_2806851 | Pdcd10    | -0.85595 | -0.72448 | -0.59886 | 0.125624 | 9.231446 | 14.67879 | 4.96E-05 | 0.002171 | 9.776267 | 8.920318 | 9.051788 |
| ILMN_2686841 | Sdcbp2    | -1.2958  | -0.93185 | -0.88165 | 0.050193 | 8.907943 | 14.66978 | 4.98E-05 | 0.002173 | 9.685269 | 8.389465 | 8.753422 |
| ILMN_2763459 | E130107N2 | 0.891343 | 0.642884 | 0.811971 | 0.169087 | 9.364809 | 14.65255 | 5.02E-05 | 0.002177 | 8.77826  | 9.669603 | 9.421144 |
| ILMN_2971845 | Dtymk     | -1.10698 | -0.52128 | -1.0261  | -0.50482 | 9.450313 | 14.64996 | 5.02E-05 | 0.002177 | 10.1139  | 9.006922 | 9.592627 |
| ILMN_2926198 | 2310016CC | -0.63818 | -0.37768 | -0.832   | -0.45432 | 7.346683 | 14.64692 | 5.03E-05 | 0.002177 | 7.808647 | 7.170471 | 7.430964 |
| ILMN_2732859 | BC023957  | 1.232135 | 1.466745 | 1.22486  | -0.24189 | 7.541679 | 14.64196 | 5.04E-05 | 0.002177 | 6.560745 | 7.792879 | 8.02749  |
| ILMN_1237230 | Dgcr2     | 0.637497 | 0.659917 | 0.539638 | -0.12028 | 9.076785 | 14.63363 | 5.06E-05 | 0.002178 | 8.617522 | 9.25502  | 9.277439 |
| ILMN_2733708 | Rbp7      | -1.05016 | -0.59581 | -0.97923 | -0.38342 | 9.642212 | 14.62566 | 5.07E-05 | 0.002178 | 10.29851 | 9.248355 | 9.702699 |
| ILMN_2648695 | Cryz1     | -0.57006 | -0.57763 | -0.77987 | -0.20225 | 9.107945 | 14.62284 | 5.08E-05 | 0.002178 | 9.589835 | 9.019775 | 9.012208 |
| ILMN_3097151 | AU040320  | 1.289519 | 1.227932 | 0.833873 | -0.39406 | 6.957846 | 14.59133 | 5.15E-05 | 0.002202 | 6.120015 | 7.409533 | 7.347947 |
| ILMN_2955883 | Vps29     | -0.66414 | -0.47441 | -0.64989 | -0.17548 | 11.85626 | 14.57976 | 5.17E-05 | 0.002207 | 12.30338 | 11.63923 | 11.82896 |
| ILMN_1253062 | 3830422KC | -1.16827 | -0.61344 | -0.65576 | -0.04232 | 6.707134 | 14.56891 | 5.20E-05 | 0.002212 | 7.316501 | 6.148233 | 6.703061 |
| ILMN_2688075 | Cyp51     | -1.25337 | -1.20711 | -0.92645 | 0.280658 | 8.116182 | 14.54912 | 5.24E-05 | 0.002216 | 8.962914 | 7.70954  | 7.755808 |
| ILMN_2789888 | Rnf10     | 0.77863  | 0.530858 | 0.700272 | 0.169414 | 11.2975  | 14.54891 | 5.24E-05 | 0.002216 | 10.79506 | 11.57369 | 11.32592 |
| ILMN_2851888 | Prkrip1   | -0.82368 | -0.54051 | -0.84846 | -0.30795 | 8.091483 | 14.53888 | 5.26E-05 | 0.002216 | 8.644645 | 7.820961 | 8.104136 |
| ILMN_2740755 | Rent1     | 0.840942 | 0.510905 | 0.544696 | 0.033791 | 6.793379 | 14.53658 | 5.27E-05 | 0.002216 | 6.319244 | 7.160186 | 6.830148 |
| ILMN_1254488 | Mgrn1     | 0.747218 | 0.531988 | 0.703778 | 0.171789 | 10.8076  | 14.53584 | 5.27E-05 | 0.002216 | 10.31186 | 11.05907 | 10.84384 |
| ILMN_3073486 | Rpl31     | -0.84918 | -0.87917 | -0.83254 | 0.046632 | 10.11901 | 14.52518 | 5.29E-05 | 0.00222  | 10.75924 | 9.910055 | 9.880065 |
| ILMN_1217567 | 3110004H1 | -1.10629 | -0.89385 | -0.97905 | -0.0852  | 7.102926 | 14.51678 | 5.31E-05 | 0.002223 | 7.847725 | 6.741433 | 6.953874 |
| ILMN_2678373 | Myst4     | 0.560881 | 0.584246 | 0.836424 | 0.252179 | 7.79788  | 14.50803 | 5.33E-05 | 0.002226 | 7.302492 | 7.863373 | 7.886738 |
| ILMN_2679077 | Nola2     | -0.71009 | -0.66773 | -1.03463 | -0.36691 | 10.40021 | 14.48849 | 5.38E-05 | 0.002239 | 11.00332 | 10.29323 | 10.3356  |
| ILMN_2990420 | Jmjd2b    | 0.662095 | 0.471071 | 0.695279 | 0.224208 | 8.733967 | 14.48129 | 5.39E-05 | 0.00224  | 8.276856 | 8.93895  | 8.747927 |

|              |           |          |          |          |          |          |          |          |          |          |          |          |
|--------------|-----------|----------|----------|----------|----------|----------|----------|----------|----------|----------|----------|----------|
| ILMN_2882059 | Rpl27a    | -1.04175 | -0.67546 | -0.6018  | 0.073657 | 9.688455 | 14.46364 | 5.43E-05 | 0.002252 | 10.26821 | 9.226459 | 9.592749 |
| ILMN_2687744 | Rnf167    | 0.673888 | 0.964633 | 0.436287 | -0.52835 | 8.605293 | 14.42198 | 5.53E-05 | 0.002286 | 8.086591 | 8.760479 | 9.051223 |
| ILMN_2845391 | N6amt1    | -1.02418 | -0.52695 | -0.9991  | -0.47216 | 5.090978 | 14.411   | 5.56E-05 | 0.002292 | 5.728535 | 4.704358 | 5.201589 |
| ILMN_1220834 | Camta2    | 1.032282 | 0.832104 | 1.273635 | 0.441531 | 10.25826 | 14.39218 | 5.60E-05 | 0.002305 | 9.473755 | 10.50604 | 10.30586 |
| ILMN_2600465 | Phactr4   | 0.7152   | 0.799336 | 0.857891 | 0.058555 | 10.79831 | 14.37017 | 5.65E-05 | 0.002321 | 10.2052  | 10.9204  | 11.00454 |
| ILMN_1216322 | Hmgcs2    | 1.966118 | 2.558378 | 2.088143 | -0.47023 | 9.435655 | 14.35484 | 5.69E-05 | 0.002326 | 7.782495 | 9.748613 | 10.34087 |
| ILMN_2732877 | 1700034H1 | -0.44047 | -0.5165  | -0.98934 | -0.47284 | 8.242049 | 14.35339 | 5.69E-05 | 0.002326 | 8.728627 | 8.288155 | 8.212127 |
| ILMN_1229238 | Mtch2     | 0.047676 | -0.28378 | -0.62807 | -0.34429 | 12.08493 | 14.34533 | 5.71E-05 | 0.002329 | 12.30097 | 12.34865 | 12.01719 |
| ILMN_2464381 | Ttc1      | -0.72536 | -0.54077 | -0.68556 | -0.14479 | 8.976224 | 14.33369 | 5.74E-05 | 0.002329 | 9.464147 | 8.738784 | 8.923376 |
| ILMN_2673566 | Eif4ebp2  | 0.911621 | 0.653307 | 1.212136 | 0.558829 | 6.771427 | 14.33213 | 5.74E-05 | 0.002329 | 6.077161 | 6.988782 | 6.730467 |
| ILMN_2652518 | 2410024A2 | 0.806319 | 0.62267  | 0.625562 | 0.002892 | 7.902614 | 14.29917 | 5.83E-05 | 0.002329 | 7.388976 | 8.195295 | 8.011646 |
| ILMN_1226334 | Mrps18b   | 0.344951 | -0.08129 | -0.50818 | -0.42689 | 8.007034 | 14.29867 | 5.83E-05 | 0.002329 | 8.068163 | 8.413114 | 7.986874 |
| ILMN_1230790 | AV312086  | 0.904417 | 0.750674 | 0.777653 | 0.026979 | 7.541048 | 14.2956  | 5.83E-05 | 0.002329 | 6.932862 | 7.837279 | 7.683536 |
| ILMN_2622630 | 0610037L1 | -0.18522 | -0.35114 | -0.71455 | -0.36341 | 7.648959 | 14.29368 | 5.84E-05 | 0.002329 | 7.961687 | 7.776463 | 7.610545 |
| ILMN_1254437 | Slc31a1   | 0.85472  | 0.770284 | 0.643261 | -0.12702 | 10.33348 | 14.29239 | 5.84E-05 | 0.002329 | 9.766418 | 10.62114 | 10.5367  |
| ILMN_2893564 | 1190007F0 | -1.18841 | -0.51989 | -0.53823 | -0.01834 | 6.337262 | 14.28811 | 5.85E-05 | 0.002329 | 6.898896 | 5.710485 | 6.379005 |
| ILMN_1237846 | 2610205H1 | -0.85852 | -0.76036 | -0.69719 | 0.063163 | 5.722562 | 14.2879  | 5.85E-05 | 0.002329 | 6.301579 | 5.443058 | 5.541224 |
| ILMN_2416424 | D19Wsu16  | 0.314686 | 0.467561 | 0.803908 | 0.336347 | 10.61337 | 14.28352 | 5.86E-05 | 0.002329 | 10.21683 | 10.53151 | 10.68439 |
| ILMN_1214937 | Mrps33    | -0.71276 | -0.62494 | -0.76092 | -0.13598 | 10.54067 | 14.28306 | 5.87E-05 | 0.002329 | 11.06532 | 10.35256 | 10.44039 |
| ILMN_2984110 | Plvap     | 1.026761 | 1.124616 | 1.217819 | 0.093203 | 10.35448 | 14.28042 | 5.87E-05 | 0.002329 | 9.512183 | 10.53894 | 10.6368  |
| ILMN_3123441 | LOC66725C | -0.6835  | -0.95177 | -0.96606 | -0.01429 | 6.41243  | 14.27094 | 5.90E-05 | 0.002333 | 7.062763 | 6.379262 | 6.11099  |
| ILMN_2592059 | Mint      | 0.811459 | 0.725325 | 0.897199 | 0.171874 | 5.209802 | 14.26528 | 5.91E-05 | 0.002333 | 4.601306 | 5.412765 | 5.326631 |
| ILMN_1253387 | Klf5      | 1.147258 | 0.635333 | 0.848491 | 0.213158 | 12.08277 | 14.2552  | 5.94E-05 | 0.002338 | 11.425   | 12.57226 | 12.06033 |
| ILMN_2654906 | Mgat3     | 0.766492 | 0.724034 | 0.658307 | -0.06573 | 8.56752  | 14.23185 | 6.00E-05 | 0.002354 | 8.030311 | 8.796803 | 8.754345 |
| ILMN_2596961 | D430028G  | 0.784556 | 0.665807 | 0.658292 | -0.00752 | 8.871561 | 14.22793 | 6.01E-05 | 0.002354 | 8.344397 | 9.128953 | 9.010205 |
| ILMN_2680665 | 1810049H1 | -0.91637 | -0.4586  | -0.74179 | -0.28319 | 9.158342 | 14.22299 | 6.02E-05 | 0.002354 | 9.687532 | 8.77116  | 9.228935 |
| ILMN_2641467 | Slc6a6    | 0.93926  | 0.705332 | 0.908332 | 0.203    | 11.74139 | 14.21086 | 6.05E-05 | 0.002361 | 11.10315 | 12.04241 | 11.80849 |
| ILMN_2655295 | Vps53     | 1.030362 | 0.507823 | 0.633986 | 0.126163 | 9.215276 | 14.17892 | 6.13E-05 | 0.002389 | 8.672233 | 9.702595 | 9.180056 |
| ILMN_2443831 | Ube1x     | 0.719414 | 0.227973 | 0.062397 | -0.16558 | 4.720245 | 14.17088 | 6.15E-05 | 0.002391 | 4.467799 | 5.187214 | 4.695772 |
| ILMN_1232428 | Rpp30     | -0.60635 | -0.56531 | -0.79727 | -0.23196 | 8.43897  | 14.15237 | 6.20E-05 | 0.002399 | 8.931205 | 8.324851 | 8.36589  |
| ILMN_1217378 | Pts       | -0.85075 | -0.65101 | -1.18904 | -0.53803 | 8.006    | 14.1491  | 6.21E-05 | 0.002399 | 8.678702 | 7.827948 | 8.027687 |
| ILMN_2977690 | Tm9sf4    | 0.879793 | 0.490122 | 0.618358 | 0.128235 | 7.980961 | 14.14468 | 6.22E-05 | 0.002399 | 7.483893 | 8.363685 | 7.974015 |
| ILMN_1232524 | Hist1h4i  | -1.18384 | -0.72585 | -0.83525 | -0.10939 | 8.071603 | 14.14188 | 6.23E-05 | 0.002399 | 8.757839 | 7.573995 | 8.031984 |
| ILMN_2612125 | Arhgef18  | 0.825841 | 0.478051 | 0.731816 | 0.253765 | 8.769902 | 14.1379  | 6.24E-05 | 0.002399 | 8.260975 | 9.086816 | 8.739027 |
| ILMN_2713872 | AW539964  | 0.850028 | 0.568619 | 0.834579 | 0.26596  | 8.76004  | 14.12847 | 6.27E-05 | 0.002403 | 8.196733 | 9.046761 | 8.765353 |

|              |            |          |          |          |          |          |          |          |          |          |          |          |
|--------------|------------|----------|----------|----------|----------|----------|----------|----------|----------|----------|----------|----------|
| ILMN_1251504 | Cyp4v3     | 0.771362 | 0.730896 | 0.768314 | 0.037418 | 12.62461 | 14.11957 | 6.29E-05 | 0.002407 | 12.05697 | 12.82833 | 12.78786 |
| ILMN_2749448 | Al840980   | 0.957073 | 0.931498 | 0.73893  | -0.19257 | 6.935095 | 14.09384 | 6.36E-05 | 0.002429 | 6.27822  | 7.235293 | 7.209717 |
| ILMN_3086136 | Centg2     | 1.314992 | 0.97147  | 1.477433 | 0.505963 | 8.632616 | 14.0876  | 6.38E-05 | 0.00243  | 7.691642 | 9.006634 | 8.663112 |
| ILMN_2493052 | Zfyve26    | 0.858808 | 0.790377 | 0.95755  | 0.167173 | 6.797467 | 14.0667  | 6.44E-05 | 0.002444 | 6.145783 | 7.004591 | 6.93616  |
| ILMN_2657628 | Sec61g     | -1.12526 | -0.69305 | -0.73739 | -0.04435 | 11.77103 | 14.06394 | 6.44E-05 | 0.002444 | 12.40996 | 11.2847  | 11.71691 |
| ILMN_2881024 | 1700040I0: | -0.59659 | -0.52158 | -0.98679 | -0.46521 | 7.030055 | 14.05515 | 6.47E-05 | 0.002448 | 7.556294 | 6.959709 | 7.034713 |
| ILMN_2732576 | Pml        | 0.955868 | 0.910214 | 1.039422 | 0.129208 | 8.30049  | 14.0481  | 6.49E-05 | 0.00245  | 7.574114 | 8.529982 | 8.484328 |
| ILMN_1221340 | Psmb7      | -0.2088  | -0.47193 | -0.71103 | -0.2391  | 11.06775 | 14.03453 | 6.53E-05 | 0.002459 | 11.41569 | 11.20689 | 10.94376 |
| ILMN_1238542 | 2810405KC  | -0.62748 | -0.76279 | -0.67766 | 0.08513  | 10.98539 | 14.02408 | 6.56E-05 | 0.002465 | 11.50238 | 10.8749  | 10.73959 |
| ILMN_2659160 | Hdac5      | 0.320409 | 0.769823 | 0.819412 | 0.049588 | 7.955109 | 14.00764 | 6.60E-05 | 0.002477 | 7.477698 | 7.798107 | 8.247521 |
| ILMN_2732229 | Prdx3      | -0.19293 | -0.48884 | -0.77071 | -0.28187 | 9.668074 | 13.99301 | 6.64E-05 | 0.002488 | 10.03119 | 9.838265 | 9.542355 |
| ILMN_2698843 | 6720485C1  | 1.047752 | 0.563304 | 0.562015 | -0.00129 | 10.20253 | 13.98245 | 6.68E-05 | 0.002494 | 9.65926  | 10.70701 | 10.22256 |
| ILMN_2733887 | Mknk2      | 0.764387 | 0.796249 | 0.938097 | 0.141848 | 9.424452 | 13.95443 | 6.76E-05 | 0.002511 | 8.799768 | 9.564155 | 9.596018 |
| ILMN_2701363 | Mrpl49     | -0.3595  | -0.53038 | -0.92266 | -0.39228 | 6.381013 | 13.95198 | 6.76E-05 | 0.002511 | 6.834148 | 6.474644 | 6.30377  |
| ILMN_2726325 | Cetn3      | -1.00245 | -0.76739 | -0.64385 | 0.123542 | 10.47873 | 13.94472 | 6.79E-05 | 0.002511 | 11.08216 | 10.07971 | 10.31476 |
| ILMN_1239113 | Mrps25     | -0.62506 | -0.53753 | -0.67152 | -0.13399 | 7.452676 | 13.94073 | 6.80E-05 | 0.002511 | 7.911203 | 7.286142 | 7.373675 |
| ILMN_1233664 | BC017647   | 0.905489 | 0.650243 | 0.911343 | 0.2611   | 7.712165 | 13.93874 | 6.80E-05 | 0.002511 | 7.095397 | 8.000885 | 7.74564  |
| ILMN_2627350 | Magoh      | -1.04456 | -0.85536 | -0.79338 | 0.061979 | 7.840925 | 13.93278 | 6.82E-05 | 0.002511 | 8.514249 | 7.469693 | 7.658889 |
| ILMN_2749354 | BC043098   | 0.796329 | 0.589311 | 0.805441 | 0.21613  | 7.85435  | 13.93123 | 6.83E-05 | 0.002511 | 7.30658  | 8.102908 | 7.89589  |
| ILMN_1215120 | Sema4a     | 0.795197 | 0.926    | 1.067595 | 0.141595 | 11.79855 | 13.92744 | 6.84E-05 | 0.002511 | 11.10135 | 11.89655 | 12.02735 |
| ILMN_1218627 | 5730437NC  | -0.94282 | -0.42806 | -0.69529 | -0.26724 | 10.77249 | 13.91047 | 6.89E-05 | 0.002524 | 11.28903 | 10.34621 | 10.86098 |
| ILMN_1240610 | Noxo1      | -1.00517 | -0.80433 | -0.62964 | 0.174688 | 7.683246 | 13.8858  | 6.96E-05 | 0.002545 | 8.293031 | 7.287861 | 7.488701 |
| ILMN_1248860 | Dpm3       | -0.7854  | -0.43812 | -0.53508 | -0.09696 | 10.47549 | 13.88058 | 6.98E-05 | 0.002545 | 10.91514 | 10.12974 | 10.47702 |
| ILMN_3163539 | D11Bwg02   | 0.714713 | 0.548224 | 0.75753  | 0.209307 | 7.692336 | 13.87714 | 6.99E-05 | 0.002545 | 7.187219 | 7.901932 | 7.735443 |
| ILMN_1255237 | Ssr4       | -0.73298 | -0.30351 | -0.33153 | -0.02802 | 12.45475 | 13.86966 | 7.01E-05 | 0.002548 | 12.79676 | 12.06377 | 12.49324 |
| ILMN_2752074 | Ppm1b      | 0.614031 | 0.47044  | 0.62789  | 0.15745  | 11.23724 | 13.85888 | 7.04E-05 | 0.002553 | 10.80915 | 11.42318 | 11.27959 |
| ILMN_1215722 | Zdhhc13    | 0.324269 | -0.34355 | -0.77    | -0.42645 | 6.185817 | 13.85528 | 7.05E-05 | 0.002553 | 6.383137 | 6.707406 | 6.03959  |
| ILMN_3030392 | 5133400GC  | -1.06046 | -0.62766 | -0.95001 | -0.32235 | 6.254571 | 13.84792 | 7.08E-05 | 0.002556 | 6.914101 | 5.853645 | 6.286443 |
| ILMN_2597936 | Adsl       | -0.02487 | -0.40289 | -0.79326 | -0.39037 | 7.425433 | 13.84066 | 7.10E-05 | 0.002559 | 7.730688 | 7.705819 | 7.327799 |
| ILMN_2958159 | Eno1       | 1.125403 | 0.511911 | 0.565168 | 0.053257 | 11.22396 | 13.83275 | 7.12E-05 | 0.002562 | 10.67334 | 11.79874 | 11.18525 |
| ILMN_2716085 | Pex6       | 0.737511 | 0.547909 | 0.782233 | 0.234324 | 10.10056 | 13.81858 | 7.17E-05 | 0.002573 | 9.583643 | 10.32115 | 10.13155 |
| ILMN_1244134 | Lrp4       | 0.897722 | 0.598139 | 0.880061 | 0.281922 | 7.70293  | 13.80319 | 7.22E-05 | 0.002585 | 7.10895  | 8.006672 | 7.707088 |
| ILMN_1233339 | Nme4       | -0.80294 | -0.42167 | -0.6627  | -0.24103 | 7.060659 | 13.77409 | 7.31E-05 | 0.002601 | 7.532487 | 6.729547 | 7.110818 |
| ILMN_1258086 | BC035291   | 0.68069  | 0.714894 | 1.010316 | 0.295422 | 7.924541 | 13.7684  | 7.33E-05 | 0.002601 | 7.323067 | 8.003756 | 8.03796  |
| ILMN_1247317 | Cct3       | 0.195688 | -0.50187 | -0.75884 | -0.25697 | 9.172425 | 13.76803 | 7.33E-05 | 0.002601 | 9.438682 | 9.63437  | 8.93681  |

|              |           |          |          |          |          |          |          |          |          |          |          |          |
|--------------|-----------|----------|----------|----------|----------|----------|----------|----------|----------|----------|----------|----------|
| ILMN_2674425 | 2610042O1 | -0.84498 | -0.7192  | -0.57718 | 0.142022 | 7.019024 | 13.76406 | 7.34E-05 | 0.002601 | 7.554364 | 6.709382 | 6.835164 |
| ILMN_2606295 | Gch1      | -1.20144 | -0.30793 | -0.46367 | -0.15574 | 10.76447 | 13.7551  | 7.37E-05 | 0.002601 | 11.25773 | 10.05629 | 10.94979 |
| ILMN_2734045 | Mrpl14    | -0.72697 | -0.59136 | -0.7467  | -0.15534 | 10.86691 | 13.75483 | 7.37E-05 | 0.002601 | 11.38316 | 10.65619 | 10.79181 |
| ILMN_2776911 | Prei3     | -0.56318 | -0.65875 | -1.09518 | -0.43644 | 7.234317 | 13.75001 | 7.39E-05 | 0.002601 | 7.813595 | 7.250414 | 7.154849 |
| ILMN_2680111 | Mrps25    | -0.67992 | -0.61447 | -0.71037 | -0.0959  | 7.149586 | 13.74854 | 7.39E-05 | 0.002601 | 7.650774 | 6.970856 | 7.036308 |
| ILMN_1239578 | Man2a1    | 0.745021 | 0.426816 | 0.692746 | 0.26593  | 9.159557 | 13.74704 | 7.40E-05 | 0.002601 | 8.693412 | 9.438433 | 9.120227 |
| ILMN_3139818 | Sbf1      | 0.885636 | 0.768689 | 0.984983 | 0.216294 | 8.590097 | 13.73652 | 7.43E-05 | 0.002608 | 7.93027  | 8.815905 | 8.698958 |
| ILMN_1227926 | FIt1      | 1.370918 | 1.250526 | 1.507137 | 0.25661  | 7.125811 | 13.7208  | 7.48E-05 | 0.00262  | 6.093665 | 7.464584 | 7.344192 |
| ILMN_2698046 | Stat3     | 0.696339 | 0.567489 | 0.947999 | 0.380509 | 8.008353 | 13.71581 | 7.50E-05 | 0.002621 | 7.455396 | 8.151735 | 8.022886 |
| ILMN_1214054 | Zdhhc7    | 0.628265 | 0.550292 | 0.680104 | 0.129811 | 11.15262 | 13.70289 | 7.54E-05 | 0.002631 | 10.68796 | 11.31622 | 11.23825 |
| ILMN_1252655 | Sectm1    | 0.898278 | 0.750833 | 0.944931 | 0.194098 | 12.67095 | 13.673   | 7.64E-05 | 0.002655 | 12.02244 | 12.92071 | 12.77327 |
| ILMN_3120797 | Pigk      | 0.70937  | 0.849558 | 0.880714 | 0.031156 | 5.770767 | 13.67253 | 7.64E-05 | 0.002655 | 5.160856 | 5.870226 | 6.010414 |
| ILMN_1224635 | Fkbp11    | -0.72593 | -1.11464 | -1.15679 | -0.04215 | 8.343085 | 13.65353 | 7.71E-05 | 0.002672 | 9.092426 | 8.366501 | 7.977782 |
| ILMN_1222682 | 1810031KC | 0.937049 | 0.634114 | 0.680828 | 0.046715 | 6.525564 | 13.6442  | 7.74E-05 | 0.002677 | 5.962567 | 6.899616 | 6.59668  |
| ILMN_1258993 | Mrps35    | -1.10044 | -1.00947 | -1.03732 | -0.02786 | 9.336462 | 13.64031 | 7.75E-05 | 0.002677 | 10.12327 | 9.022833 | 9.113802 |
| ILMN_2975640 | Snrpg     | -0.64896 | -0.49644 | -0.79026 | -0.29382 | 10.92454 | 13.63257 | 7.78E-05 | 0.002681 | 11.40845 | 10.75949 | 10.91202 |
| ILMN_2941728 | Nenf      | -0.89814 | -0.43085 | -0.70407 | -0.27322 | 9.365013 | 13.62178 | 7.81E-05 | 0.002688 | 9.873279 | 8.97514  | 9.442428 |
| ILMN_2660082 | 1110007A1 | 0.881208 | 0.511832 | 0.951765 | 0.439933 | 7.582715 | 13.61083 | 7.85E-05 | 0.002696 | 6.996513 | 7.877721 | 7.508345 |
| ILMN_2630362 | 2610002M  | -1.00236 | -1.14958 | -0.97606 | 0.173525 | 5.930718 | 13.60116 | 7.89E-05 | 0.002697 | 6.712718 | 5.71036  | 5.563135 |
| ILMN_3144575 | Itgb4     | 1.0824   | 0.98585  | 1.147998 | 0.162149 | 10.27895 | 13.60108 | 7.89E-05 | 0.002697 | 9.474884 | 10.55728 | 10.46073 |
| ILMN_2817151 | Chchd8    | -1.00641 | -0.79166 | -0.70103 | 0.090627 | 10.07658 | 13.59329 | 7.91E-05 | 0.002701 | 10.70136 | 9.694947 | 9.909702 |
| ILMN_2994744 | Rrm2b     | -0.80584 | -0.19092 | -0.01397 | 0.176956 | 6.979166 | 13.58781 | 7.93E-05 | 0.002702 | 7.231848 | 6.42601  | 7.040924 |
| ILMN_1246713 | Slc35b3   | -0.30279 | -0.51786 | -0.87442 | -0.35655 | 6.868384 | 13.57834 | 7.97E-05 | 0.002708 | 7.292153 | 6.989359 | 6.774289 |
| ILMN_3153893 | Zfp91     | 0.908348 | 0.642744 | 0.741512 | 0.098767 | 7.328094 | 13.54418 | 8.09E-05 | 0.002739 | 6.754943 | 7.663291 | 7.397687 |
| ILMN_2592656 | 2010319C1 | -0.77744 | -0.69477 | -0.71242 | -0.01764 | 10.79165 | 13.53966 | 8.10E-05 | 0.002739 | 11.33781 | 10.56037 | 10.64304 |
| ILMN_2728697 | Actr1a    | 0.807718 | 0.631173 | 0.819544 | 0.188371 | 10.70841 | 13.53939 | 8.10E-05 | 0.002739 | 10.14381 | 10.95152 | 10.77498 |
| ILMN_3161263 | AI427138  | 0.977665 | 0.560649 | 0.721667 | 0.161019 | 10.5076  | 13.52786 | 8.15E-05 | 0.002748 | 9.942603 | 10.92027 | 10.50325 |
| ILMN_1221983 | 1810030N2 | -0.88831 | -0.7827  | -0.74235 | 0.040351 | 8.483819 | 13.52191 | 8.17E-05 | 0.00275  | 9.08716  | 8.198847 | 8.304458 |
| ILMN_3129372 | 2210418O1 | -0.98706 | -0.47615 | -0.64889 | -0.17274 | 10.02321 | 13.48436 | 8.30E-05 | 0.002785 | 10.55123 | 9.564172 | 10.07508 |
| ILMN_1225772 | AU024582  | 1.00379  | 0.788378 | 0.891143 | 0.102765 | 9.563338 | 13.48019 | 8.32E-05 | 0.002785 | 8.892511 | 9.8963   | 9.680889 |
| ILMN_2752497 | 1110014D1 | -0.4034  | -0.51356 | -0.75464 | -0.24108 | 4.908131 | 13.47653 | 8.33E-05 | 0.002785 | 5.32603  | 4.922632 | 4.812474 |
| ILMN_2966386 | Rcl1      | -0.54192 | -0.83568 | -0.78657 | 0.049112 | 8.572418 | 13.47615 | 8.33E-05 | 0.002785 | 9.113459 | 8.571541 | 8.277779 |
| ILMN_2704826 | Acaa2     | 1.147225 | 0.757933 | 0.027913 | -0.73002 | 10.79392 | 13.4536  | 8.42E-05 | 0.002807 | 10.31066 | 11.45788 | 11.06859 |
| ILMN_2663679 | Mrpl48    | -0.07291 | -0.44407 | -0.70793 | -0.26386 | 10.03316 | 13.43248 | 8.50E-05 | 0.002824 | 10.33939 | 10.26648 | 9.89532  |
| ILMN_3142248 | Phc1      | 0.904887 | 0.969572 | 1.090268 | 0.120695 | 6.015814 | 13.43144 | 8.50E-05 | 0.002824 | 5.274633 | 6.179519 | 6.244205 |

|              |           |          |          |          |          |          |          |          |          |          |          |          |
|--------------|-----------|----------|----------|----------|----------|----------|----------|----------|----------|----------|----------|----------|
| ILMN_2705131 | Muted     | -0.7399  | -0.49659 | -0.50286 | -0.00627 | 9.101408 | 13.41269 | 8.57E-05 | 0.002843 | 9.536246 | 8.796342 | 9.039659 |
| ILMN_2633897 | Pde6d     | -0.67573 | -0.65745 | -0.52861 | 0.128849 | 8.701463 | 13.40601 | 8.60E-05 | 0.002846 | 9.166911 | 8.491179 | 8.509456 |
| ILMN_2745954 | 1110007L1 | -0.58816 | -0.46563 | -0.82302 | -0.35739 | 9.73923  | 13.39995 | 8.62E-05 | 0.002848 | 10.20843 | 9.620271 | 9.742804 |
| ILMN_2713969 | Eppb9     | -1.18838 | -0.52908 | -0.60241 | -0.07332 | 7.091752 | 13.37752 | 8.71E-05 | 0.002871 | 7.671718 | 6.483342 | 7.142635 |
| ILMN_2641124 | D1Bwg049  | 0.854871 | 1.290556 | 1.155144 | -0.13541 | 7.197025 | 13.37288 | 8.73E-05 | 0.002872 | 6.371883 | 7.226754 | 7.662439 |
| ILMN_2970879 | Uchl3     | -1.11411 | -1.15603 | -1.41121 | -0.25518 | 8.440676 | 13.36523 | 8.76E-05 | 0.002876 | 9.361014 | 8.246908 | 8.20498  |
| ILMN_2704822 | Acaa2     | 1.182596 | 0.679095 | 0.089727 | -0.58937 | 11.18949 | 13.35251 | 8.81E-05 | 0.002887 | 10.70164 | 11.88424 | 11.38074 |
| ILMN_2911551 | Gucy2c    | 1.658921 | 1.043172 | 0.809613 | -0.23356 | 7.323762 | 13.34381 | 8.84E-05 | 0.002893 | 6.445836 | 8.104756 | 7.489007 |
| ILMN_3128178 | Pcqap     | 0.821471 | 0.602675 | 0.773128 | 0.170453 | 8.99547  | 13.31758 | 8.94E-05 | 0.002921 | 8.446151 | 9.267622 | 9.048826 |
| ILMN_1224079 | Wfs1      | 0.994259 | 0.758356 | 0.874655 | 0.116299 | 6.516892 | 13.29367 | 9.04E-05 | 0.002947 | 5.860074 | 6.854333 | 6.61843  |
| ILMN_2626143 | Phpt1     | -0.74463 | -0.55218 | -0.84804 | -0.29586 | 9.531118 | 13.28153 | 9.09E-05 | 0.002958 | 10.06733 | 9.322703 | 9.515152 |
| ILMN_1228231 | Chchd1    | -0.86702 | -0.36942 | -0.37238 | -0.00296 | 12.51827 | 13.25555 | 9.20E-05 | 0.002986 | 12.92047 | 12.05345 | 12.55105 |
| ILMN_2659762 | Mrpl18    | -0.45397 | -0.67233 | -0.94606 | -0.27374 | 9.306696 | 13.24939 | 9.22E-05 | 0.002986 | 9.824787 | 9.370815 | 9.15246  |
| ILMN_2653284 | Ctns      | 0.647783 | 0.752955 | 0.680776 | -0.07218 | 8.492004 | 13.24809 | 9.23E-05 | 0.002986 | 7.971626 | 8.619409 | 8.724581 |
| ILMN_2764019 | 5832424M  | -0.64565 | 0.030335 | 0.119909 | 0.089574 | 10.32248 | 13.23003 | 9.30E-05 | 0.003    | 10.44633 | 9.800689 | 10.47667 |
| ILMN_2603781 | D17Wsu10  | -0.7642  | -0.2527  | -0.4466  | -0.1939  | 9.985286 | 13.22932 | 9.31E-05 | 0.003    | 10.35116 | 9.58696  | 10.09846 |
| ILMN_1231658 | Commd1    | -0.7194  | -0.47071 | -0.77738 | -0.30667 | 11.19052 | 13.22134 | 9.34E-05 | 0.003005 | 11.6824  | 10.96299 | 11.21169 |
| ILMN_3008238 | Tmem8     | 0.530308 | 0.633431 | 0.749794 | 0.116363 | 8.915197 | 13.20196 | 9.42E-05 | 0.003025 | 8.436814 | 8.967122 | 9.070245 |
| ILMN_2669912 | Nrp       | 0.878256 | 0.803097 | 1.172059 | 0.368963 | 7.605142 | 13.19853 | 9.44E-05 | 0.003025 | 6.891789 | 7.770045 | 7.694886 |
| ILMN_2972627 | Hint3     | -0.97444 | -0.73398 | -1.10326 | -0.36928 | 10.07033 | 13.19457 | 9.45E-05 | 0.003025 | 10.77326 | 9.798817 | 10.03927 |
| ILMN_1221616 | Mad2l1bp  | -0.81123 | -0.54913 | -0.50019 | 0.048935 | 8.22503  | 13.18546 | 9.49E-05 | 0.003032 | 8.690167 | 7.878936 | 8.141041 |
| ILMN_2638781 | 2310057G1 | -0.89258 | -0.81502 | -1.34416 | -0.52914 | 6.849659 | 13.16373 | 9.59E-05 | 0.003056 | 7.612597 | 6.720019 | 6.797582 |
| ILMN_2491859 | Ttyh2     | 0.921765 | 0.933756 | 0.925597 | -0.00816 | 8.198861 | 13.15766 | 9.61E-05 | 0.003059 | 7.503581 | 8.425346 | 8.437338 |
| ILMN_3160787 | Uble1b    | -0.65529 | -0.70641 | -0.78208 | -0.07567 | 9.028984 | 13.14747 | 9.66E-05 | 0.003061 | 9.564929 | 8.909634 | 8.858522 |
| ILMN_1244768 | Srprb     | -0.1829  | -0.42417 | -0.65579 | -0.23162 | 8.203333 | 13.14509 | 9.67E-05 | 0.003061 | 8.519047 | 8.336147 | 8.094879 |
| ILMN_2650953 | Slc12a7   | 0.952015 | 1.07546  | 0.971976 | -0.10348 | 7.225569 | 13.144   | 9.67E-05 | 0.003061 | 6.475706 | 7.427722 | 7.551167 |
| ILMN_3160326 | Prkg2     | 1.07562  | 1.05569  | 0.776024 | -0.27967 | 9.573334 | 13.13384 | 9.72E-05 | 0.003069 | 8.8465   | 9.92212  | 9.90219  |
| ILMN_1239143 | Sdhd      | -0.99913 | -1.11209 | -1.08104 | 0.031044 | 7.016352 | 13.12355 | 9.76E-05 | 0.003078 | 7.814416 | 6.815291 | 6.702329 |
| ILMN_2471793 | Ube2l3    | 0.667407 | 0.478091 | 0.776576 | 0.298486 | 10.67058 | 13.09593 | 9.88E-05 | 0.003111 | 10.19006 | 10.85747 | 10.66815 |
| ILMN_2676634 | Zfand2b   | -0.91575 | -0.53753 | -0.69242 | -0.15489 | 7.617774 | 13.08456 | 9.93E-05 | 0.003122 | 8.1542   | 7.238447 | 7.616668 |
| ILMN_1260219 | Adipor2   | 0.605299 | 0.676416 | 0.491715 | -0.1847  | 12.1795  | 13.07385 | 9.98E-05 | 0.003131 | 11.73614 | 12.34144 | 12.41256 |
| ILMN_2612738 | Coq5      | 0.066    | -0.33889 | -0.60189 | -0.263   | 7.282939 | 13.05861 | 0.000101 | 0.003147 | 7.501634 | 7.567633 | 7.162744 |
| ILMN_1259076 | BC013481  | 1.520807 | 0.56053  | 0.671526 | 0.110996 | 8.129074 | 13.04969 | 0.000101 | 0.003154 | 7.440859 | 8.961666 | 8.001389 |
| ILMN_2850450 | Apbb2     | 0.941598 | 0.770036 | 0.847075 | 0.07704  | 6.248189 | 13.04454 | 0.000101 | 0.003155 | 5.608512 | 6.55011  | 6.378548 |
| ILMN_2676294 | BC048355  | -0.47063 | -0.75757 | -1.01585 | -0.25828 | 5.626336 | 13.04102 | 0.000101 | 0.003155 | 6.187349 | 5.71672  | 5.429778 |



|              |           |          |          |          |          |          |          |          |          |          |          |          |
|--------------|-----------|----------|----------|----------|----------|----------|----------|----------|----------|----------|----------|----------|
| ILMN_2418725 | Zdhhc3    | 0.808223 | 0.462344 | 0.775277 | 0.312933 | 6.353704 | 13.03364 | 0.000102 | 0.00316  | 5.842243 | 6.650466 | 6.304587 |
| ILMN_2637639 | Rps3      | -1.01491 | -0.79759 | -0.92693 | -0.12935 | 10.30589 | 13.02568 | 0.000102 | 0.003166 | 10.99075 | 9.975839 | 10.19316 |
| ILMN_2897891 | Rgs1      | -0.63979 | -0.35586 | -0.67237 | -0.31651 | 6.685472 | 13.00647 | 0.000103 | 0.003188 | 7.102475 | 6.462689 | 6.746614 |
| ILMN_2828427 | Llgl1     | 0.523775 | 0.486051 | 0.785478 | 0.299426 | 8.382746 | 13.00302 | 0.000103 | 0.003188 | 7.93392  | 8.457695 | 8.419971 |
| ILMN_2742293 | 181000901 | -0.62174 | -0.34394 | -0.54444 | -0.2005  | 9.338168 | 12.98607 | 0.000104 | 0.003207 | 9.715695 | 9.09396  | 9.371756 |
| ILMN_2595857 | 2310006J0 | -1.77335 | -1.58838 | -1.39175 | 0.196624 | 6.656902 | 12.97929 | 0.000104 | 0.003209 | 7.84527  | 6.071924 | 6.256894 |
| ILMN_2621909 | 1700023M  | -1.12728 | -0.57917 | -0.45675 | 0.122422 | 8.065325 | 12.97664 | 0.000104 | 0.003209 | 8.606125 | 7.47884  | 8.026956 |
| ILMN_1235909 | Ak2       | 0.867835 | 0.603347 | 0.234634 | -0.36871 | 11.47848 | 12.95427 | 0.000105 | 0.003235 | 11.05203 | 11.91987 | 11.65538 |
| ILMN_2456617 | Mapk8     | 0.321021 | 0.674182 | 0.836751 | 0.16257  | 7.460724 | 12.95123 | 0.000106 | 0.003235 | 7.002736 | 7.323756 | 7.676917 |
| ILMN_1220284 | Psmc7     | -0.29599 | -0.51933 | -0.79332 | -0.27399 | 8.376807 | 12.94507 | 0.000106 | 0.003238 | 8.778966 | 8.482973 | 8.259639 |
| ILMN_1238919 | Drg1      | -0.31318 | -0.44397 | -0.63179 | -0.18782 | 9.810416 | 12.94042 | 0.000106 | 0.003239 | 10.15765 | 9.844469 | 9.713682 |
| ILMN_2435822 | Tmc4      | 0.963805 | 0.87324  | 0.771516 | -0.10172 | 9.544897 | 12.93666 | 0.000106 | 0.003239 | 8.892757 | 9.856562 | 9.765997 |
| ILMN_2596007 | 1700048E2 | -0.9078  | -0.59956 | -0.73137 | -0.13181 | 9.339478 | 12.92823 | 0.000107 | 0.003246 | 9.89916  | 8.991362 | 9.299602 |
| ILMN_2739123 | Pex7      | -0.55334 | -0.57168 | -0.83199 | -0.26031 | 7.88071  | 12.90468 | 0.000108 | 0.003276 | 8.369961 | 7.816625 | 7.798282 |
| ILMN_2956932 | Acadvl    | 0.890686 | 0.650121 | 0.251362 | -0.39876 | 10.88734 | 12.84768 | 0.000111 | 0.003356 | 10.43929 | 11.32998 | 11.08941 |
| ILMN_2971946 | Lsm5      | -0.92087 | -0.69825 | -0.79111 | -0.09286 | 10.6666  | 12.84368 | 0.000111 | 0.003357 | 11.26915 | 10.34828 | 10.57091 |
| ILMN_2655126 | 2010323F1 | -1.1326  | -0.4858  | -0.73653 | -0.25073 | 8.277146 | 12.81532 | 0.000112 | 0.003395 | 8.865877 | 7.733279 | 8.380082 |
| ILMN_2615468 | Fgfr1op2  | -0.76514 | -0.42786 | -0.49371 | -0.06585 | 8.79318  | 12.80551 | 0.000113 | 0.003402 | 9.214855 | 8.44972  | 8.786999 |
| ILMN_3160556 | Smg6      | 0.693595 | 0.763589 | 0.778497 | 0.014908 | 6.332863 | 12.7979  | 0.000113 | 0.003402 | 5.773943 | 6.467538 | 6.537532 |
| ILMN_2869225 | Rpl19     | -0.92789 | -0.53312 | -0.69136 | -0.15824 | 11.75602 | 12.79428 | 0.000113 | 0.003402 | 12.29411 | 11.36623 | 11.76099 |
| ILMN_2916202 | Pipox     | 0.303932 | -0.54038 | -0.40758 | 0.1328   | 6.371431 | 12.79247 | 0.000114 | 0.003402 | 6.532439 | 6.83637  | 5.992057 |
| ILMN_1220640 | Tm9sf4    | 0.82049  | 0.692843 | 0.541134 | -0.15171 | 7.64593  | 12.79058 | 0.000114 | 0.003402 | 7.132313 | 7.952803 | 7.825156 |
| ILMN_1222313 | Hist1h4f  | -1.1463  | -0.93287 | -0.91987 | 0.013006 | 6.612624 | 12.7878  | 0.000114 | 0.003402 | 7.362384 | 6.216088 | 6.429509 |
| ILMN_2866185 | Btg1      | 0.467839 | 0.685569 | 0.576027 | -0.10954 | 11.51994 | 12.78021 | 0.000114 | 0.003408 | 11.08758 | 11.55542 | 11.77315 |
| ILMN_2632940 | Sumo1     | -0.445   | -0.59322 | -0.92123 | -0.32801 | 9.01064  | 12.77252 | 0.000115 | 0.003415 | 9.500503 | 9.055501 | 8.907281 |
| ILMN_2968807 | Rpain     | -0.89561 | -0.48881 | -0.63724 | -0.14843 | 8.66801  | 12.76491 | 0.000115 | 0.003421 | 9.173425 | 8.277818 | 8.684612 |
| ILMN_3146362 | BC060631  | 0.986648 | 0.482369 | 0.862048 | 0.379678 | 7.23462  | 12.7548  | 0.000115 | 0.00343  | 6.651854 | 7.638502 | 7.134223 |
| ILMN_1246044 | Mrps25    | -0.97425 | -0.81653 | -0.88952 | -0.07299 | 5.834201 | 12.75167 | 0.000116 | 0.00343  | 6.504276 | 5.53003  | 5.687742 |
| ILMN_2728320 | Spcs1     | -0.57048 | -0.511   | -0.76118 | -0.25018 | 11.27323 | 12.69958 | 0.000118 | 0.003503 | 11.7339  | 11.16342 | 11.2229  |
| ILMN_2857595 | AI413582  | -1.01447 | -0.59762 | -0.86136 | -0.26374 | 7.79434  | 12.68571 | 0.000119 | 0.003503 | 8.412704 | 7.39823  | 7.815083 |
| ILMN_2631813 | Gemin6    | -0.38721 | -0.55388 | -0.91739 | -0.36351 | 7.897082 | 12.68535 | 0.000119 | 0.003503 | 8.361702 | 7.97449  | 7.807824 |
| ILMN_2606711 | Nme6      | -0.52415 | -0.4623  | -0.92064 | -0.45834 | 6.738073 | 12.68333 | 0.000119 | 0.003503 | 7.214844 | 6.690696 | 6.752544 |
| ILMN_3053655 | BC004728  | -0.76047 | -0.37516 | -0.79631 | -0.42115 | 6.58843  | 12.68014 | 0.00012  | 0.003503 | 7.071416 | 6.310943 | 6.696255 |
| ILMN_2604224 | Sema5a    | 1.221195 | 0.873763 | 1.421254 | 0.547491 | 7.733631 | 12.67922 | 0.00012  | 0.003503 | 6.854579 | 8.075773 | 7.728342 |
| ILMN_2600508 | Eif2b1    | -0.30915 | -0.71146 | -0.94628 | -0.23483 | 7.774526 | 12.67562 | 0.00012  | 0.003503 | 8.266247 | 7.957099 | 7.554791 |

|              |           |          |          |          |          |          |          |          |          |          |          |          |
|--------------|-----------|----------|----------|----------|----------|----------|----------|----------|----------|----------|----------|----------|
| ILMN_2677859 | Insl6     | -0.97767 | -0.73209 | -0.81951 | -0.08743 | 11.18455 | 12.67277 | 0.00012  | 0.003503 | 11.81686 | 10.8392  | 11.08478 |
| ILMN_1249032 | 2410129H1 | -0.9703  | -0.98133 | -1.03447 | -0.05314 | 7.887504 | 12.67266 | 0.00012  | 0.003503 | 8.63403  | 7.66373  | 7.6527   |
| ILMN_2845080 | Psap      | 0.677852 | 0.714554 | 0.708112 | -0.00644 | 12.31166 | 12.66628 | 0.00012  | 0.003503 | 11.78653 | 12.46438 | 12.50108 |
| ILMN_2834451 | Tusc2     | -0.89973 | -0.29331 | -0.39957 | -0.10626 | 6.997232 | 12.66347 | 0.00012  | 0.003503 | 7.395384 | 6.495656 | 7.102072 |
| ILMN_2758545 | Cldn23    | -0.86163 | -0.62872 | -0.34447 | 0.284252 | 9.799172 | 12.65935 | 0.000121 | 0.003503 | 10.25788 | 9.396249 | 9.629155 |
| ILMN_2747430 | Atp7a     | 0.203392 | 0.531434 | 0.891047 | 0.359613 | 5.42875  | 12.65625 | 0.000121 | 0.003503 | 5.022282 | 5.225674 | 5.553717 |
| ILMN_1244074 | Ap3s2     | 0.79834  | 0.383484 | 0.582019 | 0.198535 | 6.723223 | 12.65529 | 0.000121 | 0.003503 | 6.282262 | 7.080602 | 6.665746 |
| ILMN_2604494 | Podxl     | 0.81064  | 0.479646 | 1.094266 | 0.61462  | 6.884344 | 12.64536 | 0.000121 | 0.003512 | 6.288206 | 7.098845 | 6.767852 |
| ILMN_1253322 | Tex261    | 0.797375 | 0.425653 | 0.862762 | 0.437109 | 7.780853 | 12.64243 | 0.000122 | 0.003512 | 7.259405 | 8.05678  | 7.685058 |
| ILMN_2646938 | Mtx1      | -0.15445 | -0.41866 | -0.62375 | -0.20509 | 9.458338 | 12.63071 | 0.000122 | 0.003516 | 9.757552 | 9.603101 | 9.338895 |
| ILMN_1260262 | Mrpl30    | -0.55514 | -0.65603 | -0.79003 | -0.134   | 10.20998 | 12.62948 | 0.000122 | 0.003516 | 10.71028 | 10.15514 | 10.05425 |
| ILMN_1226035 | 2810442O1 | 0.805675 | 0.872195 | 0.708854 | -0.16334 | 8.692265 | 12.62915 | 0.000122 | 0.003516 | 8.095585 | 8.90126  | 8.967779 |
| ILMN_2588244 | Hist1h4c  | -0.96347 | -0.53984 | -0.55752 | -0.01768 | 5.392872 | 12.62219 | 0.000123 | 0.003516 | 5.908079 | 4.944612 | 5.368242 |
| ILMN_2671689 | Cox7b     | -1.24143 | -1.09484 | -0.95262 | 0.142219 | 6.669619 | 12.62204 | 0.000123 | 0.003516 | 7.491843 | 6.250408 | 6.397004 |
| ILMN_2789047 | 1110001AC | -0.98773 | -0.57691 | -0.61056 | -0.03365 | 6.312465 | 12.60319 | 0.000124 | 0.003536 | 6.856267 | 5.868535 | 6.279353 |
| ILMN_1229534 | Rnf167    | 0.672134 | 0.955281 | 0.420837 | -0.53444 | 8.403773 | 12.60251 | 0.000124 | 0.003536 | 7.89171  | 8.563844 | 8.846991 |
| ILMN_2660414 | Alg5      | -0.67205 | -0.42986 | -0.74621 | -0.31635 | 9.710756 | 12.59031 | 0.000125 | 0.003551 | 10.17279 | 9.50074  | 9.742923 |
| ILMN_2482555 | Ubqln1    | 0.976855 | 0.46278  | 0.27429  | -0.18849 | 7.236201 | 12.58469 | 0.000125 | 0.003554 | 6.80772  | 7.784575 | 7.2705   |
| ILMN_2744228 | 2610209A2 | -0.8579  | -1.09134 | -0.75966 | 0.331676 | 5.142236 | 12.57877 | 0.000125 | 0.003558 | 5.81946  | 4.961562 | 4.728122 |
| ILMN_1230489 | AA407930  | -1.42982 | -0.51495 | -0.35819 | 0.156759 | 9.425744 | 12.56502 | 0.000126 | 0.003575 | 10.00148 | 8.571662 | 9.486536 |
| ILMN_2771709 | Ppargc1b  | 1.157458 | 0.581034 | 1.139074 | 0.558041 | 7.593214 | 12.56113 | 0.000126 | 0.003576 | 6.873822 | 8.031281 | 7.454856 |
| ILMN_2939012 | 1500012F0 | -1.12433 | -0.54353 | -0.78952 | -0.24599 | 11.36898 | 12.53303 | 0.000128 | 0.003617 | 11.98332 | 10.85899 | 11.43979 |
| ILMN_3161767 | Dhx38     | 0.614436 | 0.472682 | 0.652189 | 0.179507 | 9.544992 | 12.51944 | 0.000129 | 0.003632 | 9.110165 | 9.724601 | 9.582848 |
| ILMN_2712044 | Bcl11a    | 1.008293 | 0.987222 | 1.088807 | 0.101585 | 5.765168 | 12.51719 | 0.000129 | 0.003632 | 4.994088 | 6.002381 | 5.98131  |
| ILMN_1237197 | Nrp       | 0.942345 | 0.848653 | 1.200595 | 0.351942 | 7.656421 | 12.50676 | 0.00013  | 0.003644 | 6.908522 | 7.850867 | 7.757175 |
| ILMN_2699003 | Siva      | -0.99852 | -0.64958 | -0.73486 | -0.08528 | 9.800222 | 12.49124 | 0.000131 | 0.003664 | 10.39596 | 9.397443 | 9.746382 |
| ILMN_2671517 | Rps15     | -0.73509 | -0.38363 | -0.47129 | -0.08766 | 12.68797 | 12.47673 | 0.000131 | 0.003683 | 13.08548 | 12.35039 | 12.70185 |
| ILMN_1223335 | AI604832  | 0.539757 | 0.703468 | 0.453281 | -0.25019 | 8.300736 | 12.46016 | 0.000132 | 0.003706 | 7.876609 | 8.416366 | 8.580078 |
| ILMN_2895084 | Zfp715    | -1.02224 | -0.49988 | -0.60603 | -0.10615 | 7.206288 | 12.45188 | 0.000133 | 0.003715 | 7.738328 | 6.716085 | 7.238445 |
| ILMN_2475727 | Ube2l3    | 0.812755 | 0.611121 | 0.854946 | 0.243825 | 10.42382 | 12.4246  | 0.000135 | 0.003756 | 9.854113 | 10.66687 | 10.46523 |
| ILMN_1256420 | Slc25a38  | -0.85447 | -0.42619 | -0.61464 | -0.18844 | 8.198641 | 12.42119 | 0.000135 | 0.003756 | 8.672466 | 7.817995 | 8.246272 |
| ILMN_1255832 | AF322649  | 1.20179  | 0.869306 | 1.221113 | 0.351807 | 6.623221 | 12.41465 | 0.000135 | 0.003758 | 5.800168 | 7.001958 | 6.669475 |
| ILMN_2652645 | Gnb2-rs1  | -1.20282 | -0.98345 | -0.8306  | 0.152851 | 5.48484  | 12.41328 | 0.000135 | 0.003758 | 6.23906  | 5.036235 | 5.255607 |
| ILMN_2522023 | Tusc2     | -0.89795 | -0.40568 | -0.71231 | -0.30663 | 7.971249 | 12.3897  | 0.000137 | 0.003794 | 8.475233 | 7.57728  | 8.069554 |
| ILMN_1223949 | Cldn4     | -1.26189 | -0.2943  | 0.183061 | 0.477358 | 11.14642 | 12.386   | 0.000137 | 0.003795 | 11.4897  | 10.22781 | 11.1954  |

|              |           |          |          |          |          |          |          |          |          |          |          |          |
|--------------|-----------|----------|----------|----------|----------|----------|----------|----------|----------|----------|----------|----------|
| ILMN_3082287 | 4933421E1 | -1.11119 | -0.5613  | -0.86458 | -0.30328 | 7.898961 | 12.38101 | 0.000137 | 0.003797 | 8.533229 | 7.422038 | 7.971929 |
| ILMN_3114365 | TxnI4     | -0.23703 | -0.34561 | -0.70053 | -0.35492 | 9.594976 | 12.37597 | 0.000138 | 0.003798 | 9.915771 | 9.678739 | 9.570157 |
| ILMN_2514292 | Zyx       | 0.947771 | 0.78771  | 0.941794 | 0.154084 | 11.71521 | 12.37295 | 0.000138 | 0.003798 | 11.04589 | 11.99366 | 11.8336  |
| ILMN_2510196 | Gtpbp1    | 0.896307 | 0.686351 | 0.681003 | -0.00535 | 7.239263 | 12.37067 | 0.000138 | 0.003798 | 6.673348 | 7.569656 | 7.359699 |
| ILMN_3106592 | Dscr111   | 0.362301 | 1.034525 | 0.903543 | -0.13098 | 5.29822  | 12.35344 | 0.000139 | 0.003812 | 4.723128 | 5.085429 | 5.757653 |
| ILMN_2844097 | Ches1     | 0.55256  | 0.593863 | 1.110043 | 0.516179 | 6.986218 | 12.35108 | 0.000139 | 0.003812 | 6.422101 | 6.974661 | 7.015964 |
| ILMN_1245815 | B230113M  | 0.664311 | 0.478261 | 0.688911 | 0.21065  | 7.868964 | 12.35045 | 0.000139 | 0.003812 | 7.411093 | 8.075404 | 7.889354 |
| ILMN_2672626 | Myh9      | 0.570896 | 0.48475  | 0.807612 | 0.322862 | 10.29048 | 12.34964 | 0.000139 | 0.003812 | 9.824663 | 10.39556 | 10.30941 |
| ILMN_2770876 | Rap1gds1  | 0.673538 | 0.416999 | 0.706523 | 0.289525 | 9.314025 | 12.33351 | 0.000141 | 0.003835 | 8.86476  | 9.538298 | 9.281758 |
| ILMN_2484707 | Tyms      | -0.58982 | -0.60302 | -0.98951 | -0.38649 | 8.862551 | 12.32135 | 0.000141 | 0.003842 | 9.408137 | 8.818322 | 8.805117 |
| ILMN_2671747 | Pfdn5     | -0.62095 | -0.51855 | -0.59266 | -0.07411 | 12.09878 | 12.32013 | 0.000141 | 0.003842 | 12.53182 | 11.91087 | 12.01327 |
| ILMN_2774916 | 2310026J0 | 0.71833  | 0.375537 | 0.014133 | -0.3614  | 4.790262 | 12.31941 | 0.000141 | 0.003842 | 4.513262 | 5.231592 | 4.888799 |
| ILMN_1231930 | Tesk1     | 1.136189 | 0.654405 | 1.137775 | 0.483369 | 7.114905 | 12.3087  | 0.000142 | 0.003856 | 6.382813 | 7.519002 | 7.037218 |
| ILMN_2909068 | Mrps23    | -0.55307 | -0.52671 | -0.67577 | -0.14907 | 9.434894 | 12.29892 | 0.000143 | 0.003867 | 9.873783 | 9.320709 | 9.347077 |
| ILMN_2678269 | 2610034N2 | 0.700319 | 0.309019 | 0.535228 | 0.226209 | 8.673605 | 12.2937  | 0.000143 | 0.00387  | 8.287463 | 8.987783 | 8.596482 |
| ILMN_2588572 | Rab14     | 0.589668 | 0.358625 | 0.60446  | 0.245835 | 10.15074 | 12.29067 | 0.000143 | 0.00387  | 9.762552 | 10.35222 | 10.12118 |
| ILMN_2737959 | Plekhn1   | 0.226551 | 0.593774 | 0.858777 | 0.265003 | 8.070744 | 12.28371 | 0.000144 | 0.003877 | 7.650968 | 7.877519 | 8.244742 |
| ILMN_3086201 | 2610507B1 | 1.059042 | 0.591477 | 0.628735 | 0.037259 | 6.270963 | 12.27216 | 0.000145 | 0.003892 | 5.701149 | 6.760192 | 6.292626 |
| ILMN_2733179 | Aldh2     | 0.663954 | 0.369171 | 0.532304 | 0.163133 | 12.29337 | 12.26825 | 0.000145 | 0.003893 | 11.90201 | 12.56597 | 12.27118 |
| ILMN_2497094 | Vdrip     | -0.65929 | -0.46017 | -0.49804 | -0.03787 | 8.115227 | 12.26198 | 0.000145 | 0.003899 | 8.519602 | 7.860308 | 8.059434 |
| ILMN_2841032 | Gpatch2   | 0.624295 | 0.306455 | 0.740387 | 0.433932 | 7.361695 | 12.24518 | 0.000147 | 0.003924 | 6.943911 | 7.568206 | 7.250366 |
| ILMN_2948272 | Spc24     | -0.90127 | -0.75148 | -0.76027 | -0.00879 | 7.836859 | 12.24054 | 0.000147 | 0.003927 | 8.440112 | 7.538843 | 7.688636 |
| ILMN_1244642 | Ccdc53    | -0.62565 | -0.44104 | -0.55412 | -0.11308 | 10.54219 | 12.23557 | 0.000147 | 0.00393  | 10.94739 | 10.32174 | 10.50635 |
| ILMN_1221634 | Ndst1     | 1.105316 | 1.11033  | 1.305774 | 0.195444 | 7.386575 | 12.23144 | 0.000147 | 0.003932 | 6.50622  | 7.611536 | 7.61655  |
| ILMN_1223097 | Nt5c      | -0.6971  | -0.57316 | -0.74105 | -0.16789 | 9.719812 | 12.21966 | 0.000148 | 0.003947 | 10.22264 | 9.52554  | 9.649478 |
| ILMN_2615559 | Dab2ip    | 0.572984 | 0.451774 | 0.845422 | 0.393648 | 9.18002  | 12.18206 | 0.000151 | 0.004012 | 8.712475 | 9.285459 | 9.164249 |
| ILMN_2750904 | Lrriq2    | -0.6987  | -0.79014 | -0.80636 | -0.01622 | 5.232245 | 12.16937 | 0.000152 | 0.00403  | 5.806043 | 5.107348 | 5.015904 |
| ILMN_2982985 | 2410042D2 | -0.78029 | -0.60885 | -0.61721 | -0.00836 | 7.981426 | 12.14956 | 0.000153 | 0.004062 | 8.483014 | 7.702722 | 7.874165 |
| ILMN_2917424 | Napg      | 0.628969 | 0.468566 | 0.645016 | 0.17645  | 9.249648 | 12.13305 | 0.000155 | 0.004088 | 8.81401  | 9.442979 | 9.282576 |
| ILMN_2685921 | Chrnbl    | -0.98222 | -0.59095 | -0.455   | 0.135958 | 5.776563 | 12.11923 | 0.000156 | 0.004109 | 6.283606 | 5.301383 | 5.692653 |
| ILMN_1244188 | H6pd      | 0.598968 | 0.762459 | 0.688963 | -0.0735  | 7.788164 | 12.11472 | 0.000156 | 0.004112 | 7.275567 | 7.874535 | 8.038026 |
| ILMN_2740222 | D5Ert689i | -1.08117 | -0.8308  | -0.65426 | 0.17654  | 7.476823 | 12.11102 | 0.000156 | 0.004113 | 8.118381 | 7.037209 | 7.287581 |
| ILMN_2603581 | 0610033HC | -0.57744 | -0.40482 | -0.41389 | -0.00906 | 11.29316 | 12.1047  | 0.000157 | 0.004116 | 11.6422  | 11.06476 | 11.23738 |
| ILMN_3102653 | 6230410P1 | 1.293182 | 1.26952  | 1.017967 | -0.25155 | 6.58663  | 12.10319 | 0.000157 | 0.004116 | 5.691462 | 6.984644 | 6.960982 |
| ILMN_2498659 | Tom1l2    | 0.771728 | 0.557708 | 1.088174 | 0.530466 | 5.480775 | 12.09697 | 0.000157 | 0.004122 | 4.876372 | 5.6481   | 5.43408  |

|              |           |          |          |          |          |          |          |          |          |          |          |          |
|--------------|-----------|----------|----------|----------|----------|----------|----------|----------|----------|----------|----------|----------|
| ILMN_1227103 | 2010007H1 | -0.72344 | -0.3729  | -0.56908 | -0.19618 | 8.58201  | 12.07766 | 0.000159 | 0.004153 | 8.998363 | 8.274926 | 8.625467 |
| ILMN_1255301 | 2410042D2 | -0.87278 | -0.81495 | -1.02267 | -0.20772 | 5.487086 | 12.06637 | 0.00016  | 0.00417  | 6.164686 | 5.291907 | 5.349737 |
| ILMN_2834696 | Snap23    | -0.81984 | -0.58565 | -0.42948 | 0.156166 | 9.785042 | 12.05309 | 0.000161 | 0.00419  | 10.24378 | 9.423944 | 9.658138 |
| ILMN_2613832 | Mgst2     | -0.77816 | -0.54326 | -0.77468 | -0.23143 | 11.86308 | 12.04432 | 0.000161 | 0.004196 | 12.38711 | 11.60895 | 11.84385 |
| ILMN_2987062 | Thyn1     | -0.89148 | -0.71102 | -0.72184 | -0.01082 | 10.74448 | 12.04371 | 0.000161 | 0.004196 | 11.32556 | 10.43408 | 10.61454 |
| ILMN_2677980 | Napg      | 0.600915 | 0.46798  | 0.659428 | 0.191449 | 8.748028 | 12.03211 | 0.000162 | 0.004213 | 8.315948 | 8.916863 | 8.783927 |
| ILMN_2760629 | Nsf       | 0.948493 | 0.398008 | 0.683649 | 0.285641 | 8.55336  | 12.00387 | 0.000164 | 0.00426  | 8.045823 | 8.994316 | 8.44383  |
| ILMN_2745005 | D5Ertd708 | -0.55387 | -0.29973 | -0.57312 | -0.2734  | 8.296944 | 12.00301 | 0.000164 | 0.00426  | 8.653625 | 8.099755 | 8.353897 |
| ILMN_2903484 | Foxj3     | 0.759691 | 0.561762 | 0.663543 | 0.101781 | 8.296159 | 11.9747  | 0.000167 | 0.004306 | 7.79991  | 8.559601 | 8.361671 |
| ILMN_2703886 | Mphosph6  | -0.4816  | -0.67524 | -0.43218 | 0.243053 | 8.298921 | 11.97434 | 0.000167 | 0.004306 | 8.696175 | 8.214579 | 8.020939 |
| ILMN_1224336 | 4930422J1 | 0.565637 | 0.552028 | 0.77277  | 0.220742 | 8.308056 | 11.96957 | 0.000167 | 0.004309 | 7.835447 | 8.401084 | 8.387476 |
| ILMN_2753912 | Pdgfc     | -1.00871 | -0.54259 | -0.24576 | 0.296827 | 5.355394 | 11.96113 | 0.000168 | 0.00432  | 5.804662 | 4.795947 | 5.26207  |
| ILMN_2952292 | 0610009DC | -0.85267 | -0.74404 | -0.91474 | -0.17069 | 6.914542 | 11.94111 | 0.000169 | 0.004353 | 7.542405 | 6.689732 | 6.798364 |
| ILMN_2877367 | 2900010M  | -0.83058 | -0.38819 | -0.60916 | -0.22097 | 11.07264 | 11.93946 | 0.00017  | 0.004353 | 11.52962 | 10.69904 | 11.14143 |
| ILMN_2975718 | Rps6ka1   | 0.687873 | 0.412158 | 0.613648 | 0.20149  | 12.01914 | 11.91036 | 0.000172 | 0.004406 | 11.59072 | 12.27859 | 12.00288 |
| ILMN_3046846 | Rps27a    | -0.6854  | -0.60622 | -0.91662 | -0.3104  | 10.12881 | 11.9083  | 0.000172 | 0.004406 | 10.68087 | 9.995474 | 10.07465 |
| ILMN_2944939 | Camk1     | -0.88046 | -0.30646 | -0.38499 | -0.07853 | 8.225084 | 11.87561 | 0.000175 | 0.004469 | 8.618063 | 7.737601 | 8.311604 |
| ILMN_1233857 | Mcm6      | 0.682105 | -0.16489 | -0.17522 | -0.01033 | 7.970159 | 11.86959 | 0.000175 | 0.004476 | 7.884659 | 8.566765 | 7.71977  |
| ILMN_3145213 | H3f3a     | -0.45597 | -0.53375 | -0.61916 | -0.08541 | 12.12885 | 11.86426 | 0.000176 | 0.00448  | 12.53107 | 12.07509 | 11.99732 |
| ILMN_2980063 | Flii      | 0.665502 | 0.579999 | 0.74318  | 0.163181 | 8.035443 | 11.84964 | 0.000177 | 0.004506 | 7.538273 | 8.203774 | 8.118271 |
| ILMN_2936221 | Uprrt     | -0.64922 | -0.77493 | -0.83169 | -0.05677 | 5.042503 | 11.83222 | 0.000179 | 0.004533 | 5.606463 | 4.957244 | 4.831536 |
| ILMN_2742599 | Nfix      | 1.169534 | 1.042793 | 1.607915 | 0.565121 | 7.892273 | 11.82811 | 0.000179 | 0.004533 | 6.937213 | 8.106747 | 7.980006 |
| ILMN_2940394 | 2410016F1 | -0.54616 | -0.63259 | -0.79089 | -0.1583  | 6.616465 | 11.827   | 0.000179 | 0.004533 | 7.108876 | 6.562712 | 6.476289 |
| ILMN_2595973 | Grn       | 1.050059 | 0.947014 | 0.922488 | -0.02453 | 10.07877 | 11.82511 | 0.000179 | 0.004533 | 9.348883 | 10.39894 | 10.2959  |
| ILMN_2615412 | Gng13     | -0.86067 | -0.96169 | -0.80683 | 0.154857 | 5.79288  | 11.81119 | 0.00018  | 0.004545 | 6.450176 | 5.589508 | 5.48849  |
| ILMN_3161021 | Prkra     | -0.77243 | -0.82628 | -0.67762 | 0.148664 | 9.395286 | 11.80947 | 0.000181 | 0.004545 | 9.964367 | 9.191939 | 9.138087 |
| ILMN_2877280 | Exosc5    | -0.75126 | -0.48328 | -0.78839 | -0.30511 | 8.764819 | 11.80923 | 0.000181 | 0.004545 | 9.270549 | 8.519291 | 8.787271 |
| ILMN_2994063 | 2810004N2 | -0.57944 | -0.74127 | -0.77959 | -0.03832 | 6.702389 | 11.80575 | 0.000181 | 0.004545 | 7.227462 | 6.648025 | 6.486194 |
| ILMN_1232341 | A730008H2 | 0.759348 | 0.601979 | 0.274866 | -0.32711 | 7.066214 | 11.80486 | 0.000181 | 0.004545 | 6.657166 | 7.416514 | 7.259144 |
| ILMN_2452383 | Uros      | -0.73904 | -0.7115  | -0.77402 | -0.06252 | 6.3785   | 11.79439 | 0.000182 | 0.004556 | 6.93464  | 6.195603 | 6.223136 |
| ILMN_2729958 | Hist1h3d  | -0.75031 | -0.45631 | -0.61494 | -0.15863 | 7.610367 | 11.79363 | 0.000182 | 0.004556 | 8.065759 | 7.315444 | 7.609446 |
| ILMN_1214239 | 4930432O2 | -0.97271 | -0.52872 | -0.42427 | 0.104456 | 9.901805 | 11.7785  | 0.000183 | 0.004583 | 10.38323 | 9.410522 | 9.854506 |
| ILMN_2641069 | Plekhj1   | -0.69869 | -0.53337 | -1.10351 | -0.57013 | 6.421484 | 11.77253 | 0.000184 | 0.00459  | 7.005376 | 6.306689 | 6.472003 |
| ILMN_2646230 | Dap3      | 0.192592 | -0.22014 | -0.49106 | -0.27091 | 8.565782 | 11.76365 | 0.000185 | 0.004598 | 8.695433 | 8.888026 | 8.475292 |
| ILMN_2879681 | B4galnt2  | 1.006511 | 0.877439 | 1.014308 | 0.136868 | 11.72811 | 11.7631  | 0.000185 | 0.004598 | 11.00354 | 12.01005 | 11.88098 |

|              |           |          |          |          |          |          |          |          |          |          |          |          |
|--------------|-----------|----------|----------|----------|----------|----------|----------|----------|----------|----------|----------|----------|
| ILMN_2620365 | AU016977  | -0.75979 | -0.71994 | -0.62634 | 0.093599 | 5.511015 | 11.74604 | 0.000186 | 0.004625 | 6.03753  | 5.277743 | 5.317593 |
| ILMN_1245335 | C230078M  | 0.408182 | 0.75404  | 0.815171 | 0.061131 | 6.346198 | 11.74495 | 0.000186 | 0.004625 | 5.85185  | 6.260032 | 6.60589  |
| ILMN_2810539 | EG630499  | 0.926325 | 1.307603 | 0.758903 | -0.5487  | 10.24017 | 11.73696 | 0.000187 | 0.004637 | 9.491958 | 10.41828 | 10.79956 |
| ILMN_2628647 | Ddc       | 0.990738 | 0.784992 | 0.49247  | -0.29252 | 10.46493 | 11.73032 | 0.000188 | 0.004645 | 9.897885 | 10.88862 | 10.68288 |
| ILMN_1255960 | Spc25     | -0.47283 | -0.58084 | -0.78256 | -0.20172 | 5.710831 | 11.71897 | 0.000189 | 0.004656 | 6.169891 | 5.697058 | 5.589046 |
| ILMN_1250501 | Epn1      | 0.974795 | 0.4852   | 0.520817 | 0.035617 | 5.853231 | 11.71739 | 0.000189 | 0.004656 | 5.358028 | 6.332823 | 5.843228 |
| ILMN_2657682 | 2010308M  | -0.66933 | -0.78101 | -0.84649 | -0.06548 | 6.05523  | 11.71689 | 0.000189 | 0.004656 | 6.629439 | 5.960107 | 5.848426 |
| ILMN_2648648 | Bnip1     | -0.65405 | -0.61439 | -0.78276 | -0.16837 | 7.788413 | 11.71203 | 0.000189 | 0.00466  | 8.301214 | 7.647164 | 7.686822 |
| ILMN_1258738 | BC023957  | 0.665796 | 0.957034 | 0.95801  | 0.000976 | 8.807047 | 11.69741 | 0.000191 | 0.004681 | 8.161837 | 8.827633 | 9.118871 |
| ILMN_2647313 | C630013N  | 0.570789 | 0.464569 | 0.93056  | 0.46599  | 7.982738 | 11.697   | 0.000191 | 0.004681 | 7.491259 | 8.062048 | 7.955828 |
| ILMN_2639819 | Bet1l     | -0.80908 | -0.55093 | -0.48789 | 0.063041 | 9.524289 | 11.68775 | 0.000192 | 0.004696 | 9.986265 | 9.177189 | 9.435331 |
| ILMN_3146018 | Ccl27     | -1.00018 | -0.32395 | -0.26627 | 0.057679 | 7.644936 | 11.67453 | 0.000193 | 0.004719 | 8.042535 | 7.042357 | 7.718587 |
| ILMN_1240274 | 5830434P2 | 0.46424  | 0.670949 | 1.080193 | 0.409244 | 7.765436 | 11.66896 | 0.000193 | 0.004726 | 7.21159  | 7.67583  | 7.882539 |
| ILMN_2845214 | Lrpprc    | 0.537749 | -0.14343 | -0.17379 | -0.03036 | 7.309658 | 11.65964 | 0.000194 | 0.004741 | 7.254525 | 7.792274 | 7.111097 |
| ILMN_2773110 | Cdc25a    | 0.574658 | 0.245268 | 0.510099 | 0.264831 | 7.768929 | 11.64339 | 0.000196 | 0.004772 | 7.436422 | 8.011081 | 7.68169  |
| ILMN_2973925 | Pop5      | -0.84808 | -0.34477 | -0.62431 | -0.27954 | 10.58303 | 11.62514 | 0.000197 | 0.004803 | 11.03732 | 10.18924 | 10.69255 |
| ILMN_2764549 | BC031853  | 0.802501 | 0.76573  | 0.751171 | -0.01456 | 6.693589 | 11.62419 | 0.000198 | 0.004803 | 6.113738 | 6.91624  | 6.879468 |
| ILMN_1252210 | 2700097O  | -0.77871 | -0.89833 | -0.80586 | 0.09247  | 8.313289 | 11.61076 | 0.000199 | 0.004821 | 8.934012 | 8.155302 | 8.035686 |
| ILMN_2479024 | Ubap2l    | 0.731421 | 0.212213 | 0.39874  | 0.186527 | 7.063612 | 11.61019 | 0.000199 | 0.004821 | 6.728018 | 7.459439 | 6.940232 |
| ILMN_1226712 | 2310042L0 | -0.3553  | -0.66842 | -0.63764 | 0.030773 | 7.30477  | 11.60789 | 0.000199 | 0.004821 | 7.720109 | 7.364809 | 7.051694 |
| ILMN_2660766 | Cd59b     | -0.87122 | -0.32213 | -0.78873 | -0.4666  | 6.17558  | 11.60451 | 0.000199 | 0.004821 | 6.6711   | 5.79988  | 6.34897  |
| ILMN_1256927 | 2310040CC | 0.824578 | 0.81768  | 0.79221  | -0.02547 | 9.365208 | 11.60078 | 0.0002   | 0.004821 | 8.756592 | 9.58117  | 9.574272 |
| ILMN_2657190 | Fbxo42    | 0.920395 | 0.49132  | 0.927668 | 0.436348 | 7.214384 | 11.59976 | 0.0002   | 0.004821 | 6.629538 | 7.549933 | 7.120859 |
| ILMN_2744603 | 2010323F1 | -1.11646 | -0.44378 | -0.62097 | -0.17719 | 10.66109 | 11.58139 | 0.000202 | 0.004858 | 11.20639 | 10.08993 | 10.76261 |
| ILMN_2707127 | Nubp1     | -0.63532 | -0.48511 | -0.6224  | -0.13729 | 11.09198 | 11.57511 | 0.000202 | 0.004866 | 11.52769 | 10.89237 | 11.04258 |
| ILMN_2913326 | 2610039C1 | -0.83452 | -0.7539  | -0.78623 | -0.03234 | 9.702714 | 11.55589 | 0.000204 | 0.004895 | 10.29638 | 9.461854 | 9.542482 |
| ILMN_2792868 | Blvrb     | -0.67981 | -0.62437 | -0.70428 | -0.07991 | 10.3145  | 11.55265 | 0.000205 | 0.004895 | 10.81662 | 10.1368  | 10.19225 |
| ILMN_1216970 | Cic       | 0.495839 | 0.64277  | 0.809452 | 0.166683 | 5.604588 | 11.55203 | 0.000205 | 0.004895 | 5.117573 | 5.613412 | 5.760343 |
| ILMN_1236123 | 1110002E2 | -0.53076 | -0.48972 | -0.73285 | -0.24313 | 7.570722 | 11.55056 | 0.000205 | 0.004895 | 8.009055 | 7.478292 | 7.519335 |
| ILMN_2704823 | Acaa2     | 1.071917 | 0.587673 | -0.02011 | -0.60779 | 10.91261 | 11.54677 | 0.000205 | 0.004895 | 10.50274 | 11.57466 | 11.09041 |
| ILMN_2987937 | Golga4    | 1.056652 | 1.08067  | 1.015189 | -0.06548 | 6.561139 | 11.54325 | 0.000206 | 0.004895 | 5.773012 | 6.829664 | 6.853681 |
| ILMN_1252845 | Rpo1-1    | -0.73818 | -0.30094 | -0.42947 | -0.12853 | 7.606276 | 11.54323 | 0.000206 | 0.004895 | 7.973424 | 7.235239 | 7.672484 |
| ILMN_2776603 | Ccl9      | -1.07804 | -0.80388 | -1.10745 | -0.30357 | 9.965606 | 11.53768 | 0.000206 | 0.004902 | 10.71295 | 9.634906 | 9.909072 |
| ILMN_2591066 | Mapk9     | 0.764727 | 0.492399 | 0.623382 | 0.130983 | 9.345144 | 11.53308 | 0.000207 | 0.004906 | 8.875017 | 9.639744 | 9.367416 |
| ILMN_1235132 | Adam4     | -1.02239 | -0.80689 | -1.10815 | -0.30126 | 6.218816 | 11.52466 | 0.000207 | 0.004908 | 6.953174 | 5.930786 | 6.146283 |

|              |           |          |          |          |          |          |          |          |          |          |          |          |
|--------------|-----------|----------|----------|----------|----------|----------|----------|----------|----------|----------|----------|----------|
| ILMN_2834065 | Esco2     | -0.88962 | -1.09308 | -1.09576 | -0.00268 | 6.677335 | 11.52452 | 0.000207 | 0.004908 | 7.44695  | 6.557328 | 6.353871 |
| ILMN_2703023 | Fcho1     | 1.037569 | 0.63335  | 0.496456 | -0.13689 | 5.938467 | 11.5219  | 0.000208 | 0.004908 | 5.396623 | 6.434192 | 6.029973 |
| ILMN_2592239 | Dscr5     | -0.60244 | -0.56398 | -0.72762 | -0.16364 | 9.841846 | 11.51599 | 0.000208 | 0.004908 | 10.31535 | 9.712917 | 9.751377 |
| ILMN_2748777 | Ap1s1     | -0.72098 | -0.5348  | -0.78767 | -0.25286 | 7.86345  | 11.51595 | 0.000208 | 0.004908 | 8.374312 | 7.65333  | 7.839509 |
| ILMN_2740922 | Mrpl46    | -0.64997 | -0.49001 | -0.6911  | -0.20109 | 10.76665 | 11.51586 | 0.000208 | 0.004908 | 11.22441 | 10.57444 | 10.73441 |
| ILMN_2679885 | Mocs1     | 0.790975 | 0.571516 | 0.541407 | -0.03011 | 10.30095 | 11.50948 | 0.000209 | 0.004917 | 9.824975 | 10.61595 | 10.39649 |
| ILMN_3153869 | Ubap2l    | 1.062686 | 0.790655 | 0.723616 | -0.06704 | 5.759422 | 11.50124 | 0.00021  | 0.00493  | 5.115183 | 6.177869 | 5.905838 |
| ILMN_2679377 | Chgb      | 1.100526 | 0.67139  | 0.642173 | -0.02922 | 9.111417 | 11.49293 | 0.000211 | 0.004941 | 8.507895 | 9.60842  | 9.179284 |
| ILMN_2767187 | Mrpl53    | -0.85383 | -0.44437 | -0.67176 | -0.22739 | 10.9913  | 11.49131 | 0.000211 | 0.004941 | 11.48379 | 10.62996 | 11.03942 |
| ILMN_2904321 | Akt3      | -0.18608 | 0.395941 | 0.856205 | 0.460264 | 7.299534 | 11.47483 | 0.000213 | 0.004964 | 7.033018 | 6.846937 | 7.428959 |
| ILMN_1258526 | Lgals3bp  | 1.034445 | 1.032961 | 0.675596 | -0.35736 | 11.26914 | 11.47404 | 0.000213 | 0.004964 | 10.58338 | 11.61783 | 11.61635 |
| ILMN_2589790 | Stat3     | 0.63581  | 0.593803 | 0.932808 | 0.339005 | 8.412408 | 11.47351 | 0.000213 | 0.004964 | 7.871803 | 8.507613 | 8.465607 |
| ILMN_2602687 | Rpa2      | -0.11862 | -0.31433 | -0.82347 | -0.50914 | 6.869148 | 11.46515 | 0.000214 | 0.004978 | 7.183253 | 7.064636 | 6.868922 |
| ILMN_3127066 | Mark2     | 0.824649 | 0.723343 | 0.818681 | 0.095337 | 7.25368  | 11.45207 | 0.000215 | 0.005004 | 6.662012 | 7.486661 | 7.385355 |
| ILMN_2748384 | 5430400NC | 0.799416 | 0.675582 | 0.837426 | 0.161844 | 8.056311 | 11.44655 | 0.000216 | 0.005011 | 7.478205 | 8.277621 | 8.153787 |
| ILMN_2429800 | Tnfaip1   | 0.636446 | 0.465766 | 0.755066 | 0.2893   | 11.74424 | 11.43382 | 0.000217 | 0.005026 | 11.27992 | 11.91637 | 11.74569 |
| ILMN_2613469 | Psmb5     | -0.89197 | -0.61225 | -0.72603 | -0.11379 | 8.900763 | 11.43336 | 0.000217 | 0.005026 | 9.458326 | 8.566355 | 8.846079 |
| ILMN_1259068 | Rab11b    | 0.765813 | 0.581931 | 0.910574 | 0.328643 | 12.10216 | 11.43221 | 0.000217 | 0.005026 | 11.53758 | 12.30339 | 12.11951 |
| ILMN_1260046 | 2010005O  | 0.469907 | 0.596827 | 0.65244  | 0.055613 | 10.52159 | 11.42878 | 0.000218 | 0.005028 | 10.0918  | 10.56171 | 10.68863 |
| ILMN_2697092 | 2410002O  | -0.91813 | -1.15488 | -1.08088 | 0.073999 | 6.789351 | 11.42265 | 0.000218 | 0.005037 | 7.577823 | 6.659692 | 6.422944 |
| ILMN_2663230 | Slco3a1   | 1.123575 | 0.54658  | 1.059876 | 0.513297 | 6.386537 | 11.41308 | 0.000219 | 0.005054 | 5.70403  | 6.827605 | 6.250609 |
| ILMN_2641278 | Mfn2      | 0.733336 | 0.511069 | 0.710083 | 0.199014 | 11.05645 | 11.40286 | 0.00022  | 0.005069 | 10.56783 | 11.30116 | 11.0789  |
| ILMN_3029489 | Gm129     | 1.054736 | 0.020008 | -0.16441 | -0.18441 | 5.321535 | 11.40168 | 0.00022  | 0.005069 | 5.09395  | 6.148687 | 5.113958 |
| ILMN_2785605 | LOC732482 | -0.70248 | -0.63809 | -0.74141 | -0.10332 | 7.07315  | 11.39058 | 0.000222 | 0.00509  | 7.593643 | 6.891163 | 6.955557 |
| ILMN_1256702 | S100a10   | -1.23233 | -0.9173  | -0.59032 | 0.32698  | 9.836062 | 11.38464 | 0.000222 | 0.005099 | 10.52105 | 9.288721 | 9.603748 |
| ILMN_3103689 | 5133400GC | -0.79148 | -0.58845 | -1.00191 | -0.41346 | 6.371877 | 11.37451 | 0.000223 | 0.005118 | 6.967337 | 6.17586  | 6.378883 |
| ILMN_2710773 | 2610528O  | 0.580272 | 0.598307 | 0.676265 | 0.077958 | 9.498577 | 11.34208 | 0.000227 | 0.005189 | 9.034866 | 9.615138 | 9.633173 |
| ILMN_2774160 | Hsd11b1   | -1.41002 | -0.73043 | -0.66773 | 0.062701 | 7.803604 | 11.34127 | 0.000227 | 0.005189 | 8.505647 | 7.09563  | 7.775219 |
| ILMN_2914507 | Ndufb6    | -0.80939 | -0.71194 | -0.82965 | -0.11772 | 8.512303 | 11.33313 | 0.000228 | 0.005203 | 9.100046 | 8.29066  | 8.38811  |
| ILMN_2727692 | Numb      | 1.497615 | 0.954332 | 0.688333 | -0.266   | 5.798456 | 11.33005 | 0.000228 | 0.005205 | 5.013386 | 6.511001 | 5.967717 |
| ILMN_2600537 | Sri       | -0.57883 | -0.70426 | -0.62557 | 0.078688 | 11.28446 | 11.32645 | 0.000229 | 0.005207 | 11.76162 | 11.1828  | 11.05737 |
| ILMN_2749011 | Ap1m2     | -0.53152 | -0.71893 | -0.65408 | 0.064847 | 8.285904 | 11.30259 | 0.000232 | 0.005263 | 8.762037 | 8.230514 | 8.043108 |
| ILMN_2882425 | Fahd2a    | -0.65686 | -0.31518 | -0.91119 | -0.59601 | 7.100657 | 11.2936  | 0.000233 | 0.005279 | 7.571464 | 6.914603 | 7.256286 |
| ILMN_1242333 | Immpt2l   | -0.8994  | -0.63842 | -0.81197 | -0.17356 | 10.23528 | 11.28787 | 0.000233 | 0.005287 | 10.82273 | 9.923326 | 10.18431 |
| ILMN_2836023 | Stra13    | -0.60242 | -0.86866 | -0.69391 | 0.174749 | 5.146351 | 11.28355 | 0.000234 | 0.005291 | 5.687597 | 5.085174 | 4.818941 |

|              |           |          |          |          |          |          |          |          |          |          |          |          |
|--------------|-----------|----------|----------|----------|----------|----------|----------|----------|----------|----------|----------|----------|
| ILMN_2944301 | 1810009K1 | -0.68989 | -0.60199 | -1.03813 | -0.43614 | 7.162605 | 11.28126 | 0.000234 | 0.005291 | 7.745107 | 7.055216 | 7.143118 |
| ILMN_3160212 | AU021838  | -0.48254 | -0.65844 | -0.84263 | -0.18418 | 8.102401 | 11.27638 | 0.000235 | 0.005297 | 8.598304 | 8.115761 | 7.93986  |
| ILMN_2616709 | Nisch     | 0.563454 | 0.558296 | 0.955814 | 0.397518 | 10.88293 | 11.24801 | 0.000238 | 0.005366 | 10.36353 | 10.92699 | 10.92183 |
| ILMN_1253410 | Chic2     | -0.70084 | -0.19339 | -0.51613 | -0.32274 | 9.968782 | 11.23623 | 0.000239 | 0.005391 | 10.32137 | 9.62053  | 10.12798 |
| ILMN_1237640 | Cnih      | -0.70661 | -0.61341 | -0.78    | -0.1666  | 8.756405 | 11.22981 | 0.00024  | 0.005401 | 9.281409 | 8.574803 | 8.668004 |
| ILMN_2619671 | Mrps16    | -0.90911 | -0.57817 | -0.79235 | -0.21418 | 10.34496 | 11.21843 | 0.000242 | 0.005425 | 10.91487 | 10.00576 | 10.3367  |
| ILMN_2676852 | Slc6a3    | 2.180522 | 3.009134 | 0.450313 | -2.55882 | 7.414241 | 11.21156 | 0.000242 | 0.005436 | 6.004249 | 8.184771 | 9.013382 |
| ILMN_1226447 | Sema4b    | 0.660549 | 0.770416 | 0.891934 | 0.121518 | 10.42481 | 11.20666 | 0.000243 | 0.005436 | 9.844081 | 10.50463 | 10.6145  |
| ILMN_2681622 | Nit2      | -0.32806 | -0.48643 | -0.87651 | -0.39008 | 8.028006 | 11.20529 | 0.000243 | 0.005436 | 8.450755 | 8.122695 | 7.964329 |
| ILMN_2950721 | 2810008M  | -1.11279 | -1.00813 | -1.12397 | -0.11584 | 9.119323 | 11.20162 | 0.000244 | 0.005436 | 9.930544 | 8.817758 | 8.922413 |
| ILMN_2614486 | Rga       | -0.6902  | -0.49721 | -0.37376 | 0.123445 | 7.87143  | 11.20136 | 0.000244 | 0.005436 | 8.261722 | 7.57152  | 7.764516 |
| ILMN_1237089 | Ganab     | 0.551253 | 0.544645 | 0.562099 | 0.017454 | 10.37659 | 11.19416 | 0.000244 | 0.005449 | 9.962088 | 10.51334 | 10.50673 |
| ILMN_3149143 | Entpd5    | 1.237442 | 1.0229   | 0.663937 | -0.35896 | 9.175634 | 11.17426 | 0.000247 | 0.005497 | 8.444564 | 9.682006 | 9.467464 |
| ILMN_2694381 | Dnajc7    | 0.746496 | 0.43417  | 0.739061 | 0.30489  | 10.09819 | 11.16306 | 0.000248 | 0.00552  | 9.61826  | 10.36476 | 10.05243 |
| ILMN_2665552 | Mrpl22    | -0.65218 | -0.61905 | -0.805   | -0.18595 | 8.920859 | 11.15726 | 0.000249 | 0.005523 | 9.439916 | 8.787734 | 8.820866 |
| ILMN_1236009 | Camk2b    | 0.784506 | 0.766223 | 0.688465 | -0.07776 | 7.397036 | 11.15705 | 0.000249 | 0.005523 | 6.837237 | 7.621743 | 7.60346  |
| ILMN_1235047 | 3110009E1 | -0.68271 | -0.63689 | -0.73016 | -0.09327 | 7.924912 | 11.15354 | 0.000249 | 0.005526 | 8.437352 | 7.754638 | 7.800465 |
| ILMN_1249131 | BC017158  | 0.826178 | 0.429342 | 0.758005 | 0.328663 | 7.972566 | 11.15049 | 0.00025  | 0.005527 | 7.469185 | 8.295363 | 7.898527 |
| ILMN_2668001 | Bxdc2     | -0.07314 | -0.41728 | -0.66377 | -0.2465  | 9.491404 | 11.14151 | 0.000251 | 0.005536 | 9.779953 | 9.706811 | 9.362673 |
| ILMN_2741006 | 1700021K1 | 0.807478 | 0.88079  | 0.782393 | -0.0984  | 7.426227 | 11.13973 | 0.000251 | 0.005536 | 6.808562 | 7.61604  | 7.689352 |
| ILMN_2705361 | Dhrs8     | 0.697109 | 1.095754 | 0.601131 | -0.49462 | 12.06772 | 11.13958 | 0.000251 | 0.005536 | 11.46922 | 12.16633 | 12.56498 |
| ILMN_2910020 | 8430427H1 | 0.750418 | 0.84753  | 1.069449 | 0.221919 | 7.131919 | 11.13378 | 0.000252 | 0.005546 | 6.46507  | 7.215488 | 7.3126   |
| ILMN_2663694 | Ndufs4    | -1.29432 | -1.11005 | -1.0369  | 0.073151 | 8.426051 | 11.12779 | 0.000253 | 0.00555  | 9.286367 | 7.992046 | 8.17632  |
| ILMN_3006990 | EG622339  | 0.864421 | 0.551125 | 0.542734 | -0.00839 | 12.97659 | 11.12731 | 0.000253 | 0.00555  | 12.48702 | 13.35144 | 13.03814 |
| ILMN_2683190 | Orc6l     | -0.78339 | -0.73895 | -0.91714 | -0.17818 | 8.740576 | 11.12018 | 0.000254 | 0.005553 | 9.350447 | 8.567057 | 8.611492 |
| ILMN_2440997 | Tnrc6     | 0.645984 | 0.717114 | 1.034374 | 0.31726  | 7.779544 | 11.11554 | 0.000254 | 0.005553 | 7.180176 | 7.826159 | 7.89729  |
| ILMN_2757092 | Hint3     | -0.77037 | -0.5311  | -0.99236 | -0.46126 | 9.861736 | 11.11484 | 0.000254 | 0.005553 | 10.43519 | 9.664823 | 9.904094 |
| ILMN_1236344 | 1700019E1 | -0.74252 | -0.58633 | -0.46972 | 0.116601 | 8.70238  | 11.11103 | 0.000255 | 0.005553 | 9.152024 | 8.4095   | 8.565698 |
| ILMN_2752489 | Rab17     | -1.18309 | -0.5547  | -0.77557 | -0.22087 | 8.890407 | 11.11001 | 0.000255 | 0.005553 | 9.518749 | 8.335655 | 8.964048 |
| ILMN_2674122 | Pkia      | -0.7758  | -0.03972 | -0.00601 | 0.033708 | 6.676494 | 11.10877 | 0.000255 | 0.005553 | 6.881876 | 6.106079 | 6.842157 |
| ILMN_1228040 | 2810422BC | -0.55939 | -0.76381 | -0.82624 | -0.06243 | 6.318667 | 11.10597 | 0.000256 | 0.005553 | 6.856026 | 6.296638 | 6.092218 |
| ILMN_1256989 | Hist1h4j  | -0.9118  | -0.36182 | -0.42721 | -0.06539 | 7.862647 | 11.10543 | 0.000256 | 0.005553 | 8.287855 | 7.376054 | 7.926036 |
| ILMN_2778872 | Mad2l1    | -0.50941 | -0.66655 | -0.8971  | -0.23054 | 8.500246 | 11.10384 | 0.000256 | 0.005553 | 9.018511 | 8.509101 | 8.351959 |
| ILMN_2726055 | Shmt1     | 0.801    | -0.08755 | -0.1418  | -0.05425 | 6.60857  | 11.10012 | 0.000256 | 0.005556 | 6.465656 | 7.266656 | 6.378109 |
| ILMN_2747735 | Sec22l2   | -0.73997 | -0.50069 | -0.83432 | -0.33363 | 7.268543 | 11.09733 | 0.000257 | 0.005557 | 7.787288 | 7.047316 | 7.286597 |

|              |           |          |          |          |          |          |          |          |          |          |          |          |
|--------------|-----------|----------|----------|----------|----------|----------|----------|----------|----------|----------|----------|----------|
| ILMN_1256171 | BC026370  | 0.640486 | 0.57089  | 0.704558 | 0.133669 | 8.448997 | 11.09203 | 0.000257 | 0.005565 | 7.970014 | 8.6105   | 8.540904 |
| ILMN_2743155 | AA409316  | 0.005563 | 0.376254 | 0.773014 | 0.39676  | 8.530211 | 11.08909 | 0.000258 | 0.005566 | 8.241503 | 8.247066 | 8.617758 |
| ILMN_2712873 | Cyb5r3    | 0.875556 | 0.537514 | 0.692931 | 0.155418 | 11.84954 | 11.07422 | 0.00026  | 0.005596 | 11.32304 | 12.19859 | 11.86055 |
| ILMN_1213811 | Hsd17b2   | -1.25993 | -0.89938 | -0.66993 | 0.229457 | 9.199964 | 11.07317 | 0.00026  | 0.005596 | 9.907274 | 8.647344 | 9.007892 |
| ILMN_2824022 | Map3k7ip3 | 0.850523 | 0.74971  | 0.690142 | -0.05957 | 7.663897 | 11.07035 | 0.00026  | 0.005596 | 7.091303 | 7.941826 | 7.841013 |
| ILMN_2761109 | Clic4     | -0.65639 | -0.23158 | 0.188859 | 0.420436 | 10.03796 | 11.06892 | 0.00026  | 0.005596 | 10.21274 | 9.556351 | 9.981165 |
| ILMN_2662456 | Ppm1l     | 0.669668 | 0.558131 | 0.574518 | 0.016387 | 6.188252 | 11.05307 | 0.000262 | 0.005629 | 5.737673 | 6.40734  | 6.295804 |
| ILMN_2705804 | Pap       | -2.78937 | -3.07359 | -1.74134 | 1.33225  | 6.075931 | 11.05238 | 0.000263 | 0.005629 | 7.977005 | 5.187637 | 4.903415 |
| ILMN_1220820 | Ttc4      | -0.77078 | -0.5341  | -0.48187 | 0.052228 | 8.042406 | 11.04756 | 0.000263 | 0.005632 | 8.489092 | 7.718314 | 7.954994 |
| ILMN_2593888 | Gsk3b     | 0.881728 | 0.766678 | 0.791263 | 0.024585 | 7.063997 | 11.04555 | 0.000263 | 0.005632 | 6.45408  | 7.335808 | 7.220757 |
| ILMN_1227458 | B230104P2 | 0.511175 | 0.750635 | 1.282981 | 0.532346 | 5.751053 | 11.04208 | 0.000264 | 0.005632 | 5.114856 | 5.62603  | 5.86549  |
| ILMN_2637398 | Rabl5     | -0.93389 | -1.07519 | -0.69835 | 0.37684  | 7.441116 | 11.04163 | 0.000264 | 0.005632 | 8.117974 | 7.184087 | 7.042781 |
| ILMN_2701815 | Plxna2    | 0.004836 | 0.584065 | 0.909489 | 0.325424 | 8.078239 | 11.03846 | 0.000264 | 0.005634 | 7.703641 | 7.708477 | 8.287707 |
| ILMN_3000298 | BC053749  | 0.566289 | 0.514523 | 0.891968 | 0.377445 | 5.070638 | 11.02911 | 0.000266 | 0.005648 | 4.577443 | 5.143732 | 5.091966 |
| ILMN_3162138 | D4Wsu114  | -0.7509  | -0.08734 | 0.014052 | 0.10139  | 6.554376 | 11.02871 | 0.000266 | 0.005648 | 6.760422 | 6.009521 | 6.673085 |
| ILMN_1235717 | Tpk1      | 0.15481  | -0.67362 | -0.4466  | 0.227019 | 6.515116 | 11.02503 | 0.000266 | 0.005651 | 6.75647  | 6.91128  | 6.082848 |
| ILMN_2636463 | Tcf4      | 0.072571 | 0.392514 | 0.900434 | 0.50792  | 9.123708 | 11.02211 | 0.000267 | 0.005653 | 8.782328 | 8.854899 | 9.174842 |
| ILMN_2755424 | Bcor1     | 0.878552 | 0.559337 | 0.580935 | 0.021598 | 4.936078 | 11.01809 | 0.000267 | 0.005657 | 4.431372 | 5.309924 | 4.990709 |
| ILMN_2491860 | Ttyh2     | 0.732653 | 0.809631 | 0.755942 | -0.05369 | 8.048484 | 11.0074  | 0.000269 | 0.005681 | 7.473927 | 8.20658  | 8.283559 |
| ILMN_2788283 | lft52     | -0.60584 | -0.50574 | -0.5971  | -0.09135 | 9.278771 | 10.97543 | 0.000273 | 0.005767 | 9.705942 | 9.100103 | 9.200197 |
| ILMN_2774435 | Eif2s2    | -0.55757 | -0.63461 | -0.82024 | -0.18563 | 7.507608 | 10.97165 | 0.000274 | 0.005771 | 8.010714 | 7.453145 | 7.376104 |
| ILMN_1252283 | Tulp4     | 0.614854 | 0.537408 | 0.739148 | 0.20174  | 8.5643   | 10.96873 | 0.000274 | 0.005772 | 8.091447 | 8.706302 | 8.628855 |
| ILMN_2948649 | Helz      | 0.874092 | 0.627012 | 0.874293 | 0.247281 | 6.39025  | 10.96666 | 0.000274 | 0.005772 | 5.796401 | 6.670493 | 6.423412 |
| ILMN_1256705 | 9030607L1 | -0.88191 | -0.49512 | -0.76079 | -0.26568 | 5.950649 | 10.96271 | 0.000275 | 0.005776 | 6.485105 | 5.603193 | 5.989988 |
| ILMN_1217102 | Tpcn1     | 0.769191 | 0.68207  | 0.954235 | 0.272165 | 9.87472  | 10.96017 | 0.000275 | 0.005777 | 9.273346 | 10.04254 | 9.955416 |
| ILMN_1257333 | 2310022BC | 0.936431 | 0.81111  | 1.009727 | 0.198617 | 8.447739 | 10.95234 | 0.000276 | 0.005789 | 7.758422 | 8.694853 | 8.569532 |
| ILMN_2928875 | Atp6v1g1  | -0.78647 | -0.54161 | -0.87127 | -0.32966 | 9.197004 | 10.95116 | 0.000276 | 0.005789 | 9.746843 | 8.960373 | 9.205229 |
| ILMN_3163211 | 1110004B1 | -1.1107  | -0.81645 | -0.86767 | -0.05122 | 7.22117  | 10.94898 | 0.000277 | 0.005789 | 7.919876 | 6.809172 | 7.103428 |
| ILMN_1220423 | Nt5c2l1   | -0.87204 | -0.81115 | -0.98326 | -0.17212 | 5.778958 | 10.93506 | 0.000279 | 0.005823 | 6.44557  | 5.573533 | 5.634424 |
| ILMN_1236358 | Chd4      | 0.86006  | 0.450053 | 0.523801 | 0.073748 | 8.02863  | 10.93203 | 0.000279 | 0.005825 | 7.570151 | 8.430212 | 8.020205 |
| ILMN_1216802 | Bad       | -0.70293 | -0.49922 | -0.60617 | -0.10694 | 10.25365 | 10.92394 | 0.00028  | 0.005842 | 10.70573 | 10.00279 | 10.2065  |
| ILMN_1220446 | Anks1     | 0.60287  | 0.806294 | 0.837031 | 0.030737 | 6.645261 | 10.91955 | 0.000281 | 0.005848 | 6.083712 | 6.686582 | 6.890006 |
| ILMN_1227131 | LOC114601 | 0.25369  | 0.852844 | 0.754552 | -0.09829 | 7.521796 | 10.9171  | 0.000281 | 0.005848 | 7.056524 | 7.310215 | 7.909368 |
| ILMN_2763674 | Fto       | 0.978987 | 0.589933 | 0.921146 | 0.331213 | 9.462738 | 10.91222 | 0.000282 | 0.005856 | 8.840222 | 9.819209 | 9.430155 |
| ILMN_3005266 | Chrac1    | -0.75914 | -0.1116  | -0.2837  | -0.1721  | 9.122667 | 10.90698 | 0.000283 | 0.005865 | 9.411277 | 8.652134 | 9.29968  |



|              |           |          |          |          |          |          |          |          |          |          |          |          |
|--------------|-----------|----------|----------|----------|----------|----------|----------|----------|----------|----------|----------|----------|
| ILMN_3109989 | Pfdn4     | -0.53062 | -0.53094 | -0.66367 | -0.13273 | 10.17156 | 10.90377 | 0.000283 | 0.005867 | 10.60287 | 10.07225 | 10.07193 |
| ILMN_1217849 | Laptn5    | 1.127344 | 0.994042 | 1.084369 | 0.090327 | 11.01084 | 10.89573 | 0.000284 | 0.005882 | 10.2094  | 11.33674 | 11.20344 |
| ILMN_1255220 | Atp9a     | 0.554237 | 0.672506 | 0.67296  | 0.000453 | 8.687347 | 10.89166 | 0.000285 | 0.005882 | 8.212422 | 8.766659 | 8.884928 |
| ILMN_2917540 | Atp5o     | -0.51362 | -0.61751 | -1.01385 | -0.39634 | 8.669394 | 10.89131 | 0.000285 | 0.005882 | 9.205637 | 8.692022 | 8.588129 |
| ILMN_1248603 | Treh      | 0.732983 | 0.847808 | 0.755745 | -0.09206 | 12.00772 | 10.88638 | 0.000286 | 0.005882 | 11.42358 | 12.15656 | 12.27139 |
| ILMN_1243722 | Prosapip1 | 0.825566 | 0.443895 | 0.949845 | 0.505949 | 9.225352 | 10.8846  | 0.000286 | 0.005882 | 8.670526 | 9.496091 | 9.114421 |
| ILMN_2999007 | Casc3     | 0.706444 | 0.452255 | 0.735738 | 0.283482 | 9.306318 | 10.88062 | 0.000286 | 0.005882 | 8.832709 | 9.539153 | 9.284964 |
| ILMN_2798694 | Plekhf2   | -0.58411 | -0.31862 | -0.07423 | 0.244392 | 10.22783 | 10.88038 | 0.000287 | 0.005882 | 10.47207 | 9.887964 | 10.15345 |
| ILMN_3087187 | Zscan21   | -0.73905 | -0.68626 | -0.63984 | 0.046418 | 6.787534 | 10.87984 | 0.000287 | 0.005882 | 7.303822 | 6.564769 | 6.617563 |
| ILMN_2720836 | BC013481  | 0.549249 | 0.47067  | 0.643756 | 0.173086 | 11.18917 | 10.87596 | 0.000287 | 0.005882 | 10.77325 | 11.3225  | 11.24392 |
| ILMN_2648445 | Slc27a2   | 1.610784 | 1.743156 | 0.761872 | -0.98128 | 10.25992 | 10.8758  | 0.000287 | 0.005882 | 9.230965 | 10.84175 | 10.97412 |
| ILMN_2627300 | Akap9     | 0.285732 | 0.669678 | 0.791713 | 0.122034 | 11.28467 | 10.87181 | 0.000288 | 0.005887 | 10.84788 | 11.13362 | 11.51756 |
| ILMN_2657844 | Cdc2a     | -0.39903 | -0.84439 | -1.03827 | -0.19389 | 8.144246 | 10.86494 | 0.000289 | 0.0059   | 8.714668 | 8.315639 | 7.870282 |
| ILMN_1247173 | Tyms      | -0.7349  | -0.79017 | -1.34078 | -0.55061 | 6.52677  | 10.86233 | 0.000289 | 0.005901 | 7.243232 | 6.508329 | 6.453062 |
| ILMN_1257019 | BC037034  | 0.676728 | 0.730968 | 0.830982 | 0.100013 | 9.010602 | 10.85009 | 0.000291 | 0.005929 | 8.450933 | 9.12766  | 9.181901 |
| ILMN_3094743 | Tmpo      | 0.646297 | -0.19013 | 0.08916  | 0.279286 | 4.99577  | 10.8485  | 0.000291 | 0.005929 | 4.859437 | 5.505734 | 4.669311 |
| ILMN_3053158 | Dyrk1b    | 0.355359 | 0.764659 | 0.901921 | 0.137262 | 8.929475 | 10.84582 | 0.000292 | 0.00593  | 8.42399  | 8.779349 | 9.188649 |
| ILMN_2718204 | Scgf      | -0.44551 | -0.17124 | -1.04495 | -0.87371 | 5.378986 | 10.83905 | 0.000293 | 0.00594  | 5.79441  | 5.348902 | 5.623174 |
| ILMN_2688944 | Prss25    | -0.61114 | -0.77401 | -0.90294 | -0.12893 | 6.399012 | 10.83799 | 0.000293 | 0.00594  | 6.971035 | 6.359893 | 6.197028 |
| ILMN_1223734 | Atf4      | -0.5936  | -0.55769 | -0.98505 | -0.42736 | 9.542621 | 10.83576 | 0.000293 | 0.00594  | 10.07671 | 9.483103 | 9.519018 |
| ILMN_1227627 | Rnf141    | -0.65537 | -0.60764 | -0.8456  | -0.23796 | 7.340758 | 10.82528 | 0.000295 | 0.005957 | 7.867911 | 7.212538 | 7.260272 |
| ILMN_2887065 | Mvp       | 0.879293 | 0.426238 | 0.60783  | 0.181592 | 11.60626 | 10.82426 | 0.000295 | 0.005957 | 11.12792 | 12.00722 | 11.55416 |
| ILMN_2670427 | 201010001 | -0.57689 | -0.28735 | -0.80696 | -0.51961 | 9.89733  | 10.8234  | 0.000295 | 0.005957 | 10.31513 | 9.738241 | 10.02778 |
| ILMN_2717387 | Fbxo36    | -0.82523 | -0.83235 | -0.73366 | 0.098692 | 6.261527 | 10.81039 | 0.000297 | 0.00599  | 6.859339 | 6.034104 | 6.026987 |
| ILMN_2659025 | Mapkap1   | 0.573849 | 0.413873 | 0.392717 | -0.02116 | 9.868006 | 10.80718 | 0.000297 | 0.005993 | 9.522897 | 10.09675 | 9.93677  |
| ILMN_2627713 | AU020772  | 1.114428 | 0.513273 | 0.417126 | -0.09615 | 6.386924 | 10.79291 | 0.0003   | 0.00603  | 5.875717 | 6.990145 | 6.38899  |
| ILMN_2684987 | Hnrph1    | 0.6666   | 0.030952 | 0.146307 | 0.115355 | 6.177681 | 10.78918 | 0.0003   | 0.006035 | 5.966717 | 6.633317 | 5.997668 |
| ILMN_1252584 | C1qtnf4   | -0.72923 | -0.65617 | -0.72067 | -0.06449 | 5.08906  | 10.78675 | 0.000301 | 0.006035 | 5.615579 | 4.886346 | 4.959405 |
| ILMN_1225214 | Cdkn2d    | -0.76537 | -0.38025 | -0.29898 | 0.081275 | 5.855196 | 10.78092 | 0.000301 | 0.006046 | 6.216347 | 5.450977 | 5.836092 |
| ILMN_1236131 | Mrpl48    | -0.42363 | -0.69086 | -0.90693 | -0.21608 | 9.568327 | 10.77399 | 0.000303 | 0.006061 | 10.07368 | 9.650054 | 9.382823 |
| ILMN_1216446 | Slc5a4b   | 1.125917 | 1.194003 | 0.680751 | -0.51325 | 10.53337 | 10.7675  | 0.000304 | 0.006074 | 9.783207 | 10.90912 | 10.97721 |
| ILMN_2598571 | 5930405J0 | 0.394884 | 0.481967 | 0.705227 | 0.22326  | 6.970094 | 10.76012 | 0.000305 | 0.00609  | 6.574575 | 6.969458 | 7.056541 |
| ILMN_2672325 | Nme6      | -0.512   | -0.53667 | -0.76562 | -0.22895 | 7.534172 | 10.75464 | 0.000306 | 0.0061   | 7.987743 | 7.475745 | 7.451072 |
| ILMN_2591592 | BC049806  | -0.54793 | -0.76096 | -0.26566 | 0.495291 | 5.27474  | 10.73656 | 0.000308 | 0.006142 | 5.668377 | 5.120447 | 4.907422 |
| ILMN_2698757 | Ppm1l     | 0.705778 | 0.714771 | 0.812235 | 0.097463 | 6.605641 | 10.73595 | 0.000309 | 0.006142 | 6.047445 | 6.753223 | 6.762216 |

|              |           |          |          |          |          |          |          |          |          |          |          |          |
|--------------|-----------|----------|----------|----------|----------|----------|----------|----------|----------|----------|----------|----------|
| ILMN_2755152 | Letm1     | 0.724891 | 0.172056 | 0.126054 | -0.046   | 9.407807 | 10.7347  | 0.000309 | 0.006142 | 9.152057 | 9.876948 | 9.324113 |
| ILMN_2606947 | Rbx1      | -0.72775 | -0.52935 | -0.50261 | 0.026733 | 11.04794 | 10.72395 | 0.00031  | 0.006169 | 11.48787 | 10.76012 | 10.95852 |
| ILMN_2862379 | Rhod      | -1.23766 | -0.66458 | -0.41029 | 0.254292 | 11.12403 | 10.71962 | 0.000311 | 0.006176 | 11.70216 | 10.4645  | 11.03758 |
| ILMN_2721799 | Stoml2    | -0.22559 | -0.55611 | -0.74737 | -0.19126 | 6.413478 | 10.71539 | 0.000312 | 0.006182 | 6.795747 | 6.570157 | 6.239634 |
| ILMN_1253963 | Ptprh     | 0.517302 | 0.77659  | 0.860439 | 0.083849 | 8.023396 | 10.71255 | 0.000312 | 0.006182 | 7.484813 | 8.002115 | 8.261403 |
| ILMN_1232235 | 6530405K1 | 0.706874 | 0.50073  | 0.30631  | -0.19442 | 5.113764 | 10.71073 | 0.000313 | 0.006182 | 4.735286 | 5.44216  | 5.236016 |
| ILMN_1228999 | Ruvbl1    | 0.613571 | -0.05192 | -0.25545 | -0.20353 | 6.253584 | 10.70898 | 0.000313 | 0.006182 | 6.177035 | 6.790607 | 6.125112 |
| ILMN_2737163 | Sqle      | -0.84946 | -1.14848 | -0.35859 | 0.789892 | 9.144094 | 10.69622 | 0.000315 | 0.006215 | 9.733229 | 8.883764 | 8.584745 |
| ILMN_3003567 | Khsrp     | 0.749353 | 0.440421 | 0.593597 | 0.153177 | 7.122486 | 10.67023 | 0.000319 | 0.00628  | 6.676643 | 7.425996 | 7.117064 |
| ILMN_2756496 | 4930415J2 | 0.767073 | 0.529925 | 0.617034 | 0.08711  | 6.126719 | 10.66903 | 0.000319 | 0.00628  | 5.648211 | 6.415284 | 6.178136 |
| ILMN_2904961 | 2310008M  | -0.38902 | -0.46759 | -0.62737 | -0.15978 | 11.99133 | 10.6674  | 0.00032  | 0.00628  | 12.36233 | 11.97331 | 11.89473 |
| ILMN_2853744 | Bxdc2     | -0.13597 | -0.48226 | -0.65123 | -0.16897 | 10.00704 | 10.66733 | 0.00032  | 0.00628  | 10.3244  | 10.18843 | 9.842142 |
| ILMN_3016674 | Rreb1     | 0.874097 | 0.541805 | 0.789097 | 0.247292 | 7.639416 | 10.66077 | 0.000321 | 0.006294 | 7.088166 | 7.962263 | 7.629971 |
| ILMN_2809247 | Tmem85    | -0.60064 | -0.51922 | -0.606   | -0.08679 | 9.408607 | 10.64322 | 0.000324 | 0.006345 | 9.840072 | 9.239436 | 9.320854 |
| ILMN_1229318 | Pdk1      | -0.4543  | -0.70171 | -0.92622 | -0.22451 | 7.558737 | 10.64047 | 0.000324 | 0.006347 | 8.079294 | 7.624989 | 7.377586 |
| ILMN_1235281 | 1810063BC | -0.86559 | -0.51106 | -0.64422 | -0.13316 | 9.630493 | 10.63224 | 0.000325 | 0.006367 | 10.13571 | 9.270122 | 9.624649 |
| ILMN_2776910 | Prei3     | -0.58425 | -0.54988 | -0.96193 | -0.41205 | 7.748973 | 10.62493 | 0.000327 | 0.006371 | 8.272989 | 7.688737 | 7.723105 |
| ILMN_1256281 | 0610037H2 | -0.5179  | -0.75233 | -0.62956 | 0.122776 | 6.101563 | 10.62454 | 0.000327 | 0.006371 | 6.57651  | 6.058611 | 5.824178 |
| ILMN_1256745 | Mapkap1   | 0.573545 | 0.466802 | 0.462763 | -0.00404 | 9.890886 | 10.62438 | 0.000327 | 0.006371 | 9.515109 | 10.08865 | 9.981911 |
| ILMN_2761918 | Mmrn2     | 1.058455 | 1.059302 | 1.262946 | 0.203644 | 6.997705 | 10.62061 | 0.000327 | 0.006372 | 6.152529 | 7.210985 | 7.211831 |
| ILMN_2682019 | Ndufa8    | -0.3004  | -0.40685 | -0.60514 | -0.19829 | 11.15267 | 10.61979 | 0.000328 | 0.006372 | 11.48077 | 11.18037 | 11.07392 |
| ILMN_1217599 | Rab33b    | -0.74863 | -0.54022 | -0.56632 | -0.0261  | 8.706698 | 10.60893 | 0.000329 | 0.006401 | 9.170491 | 8.421859 | 8.630271 |
| ILMN_3066673 | LOC329575 | -0.95613 | -0.76556 | -0.92329 | -0.15773 | 6.67437  | 10.60552 | 0.00033  | 0.006405 | 7.335616 | 6.379487 | 6.570055 |
| ILMN_2778094 | 2400009B1 | -0.81398 | -0.40827 | -0.49258 | -0.08431 | 9.960736 | 10.59743 | 0.000331 | 0.006425 | 10.38944 | 9.575464 | 9.981174 |
| ILMN_1214187 | 2700088M  | -0.66892 | -0.54397 | -0.6337  | -0.08973 | 8.853486 | 10.59412 | 0.000332 | 0.006429 | 9.315132 | 8.646216 | 8.771166 |
| ILMN_1245795 | Ahcyl1    | 1.202819 | 0.645696 | 0.564609 | -0.08109 | 9.989458 | 10.59061 | 0.000333 | 0.006433 | 9.386177 | 10.589   | 10.03187 |
| ILMN_2631771 | Cenpb     | 0.468174 | 0.329392 | 0.808141 | 0.478749 | 10.08875 | 10.58841 | 0.000333 | 0.006433 | 9.687321 | 10.15549 | 10.01671 |
| ILMN_2650732 | Taf15     | 0.567785 | 0.432458 | 0.747962 | 0.315505 | 8.479765 | 10.58647 | 0.000333 | 0.006433 | 8.042714 | 8.610499 | 8.475172 |
| ILMN_2687169 | Idb3      | -0.94061 | -0.61834 | -0.58171 | 0.036628 | 8.425528 | 10.58059 | 0.000334 | 0.006445 | 8.960693 | 8.020081 | 8.342356 |
| ILMN_3149112 | Bpnt1     | 0.764559 | 0.179121 | 0.117651 | -0.06147 | 10.93794 | 10.57759 | 0.000335 | 0.006448 | 10.6726  | 11.43716 | 10.85172 |
| ILMN_1377918 | Ubc       | 0.875983 | 0.493061 | 0.566561 | 0.0735   | 11.51644 | 10.56733 | 0.000337 | 0.006475 | 11.03254 | 11.90853 | 11.5256  |
| ILMN_1216091 | Wipi1     | 0.744175 | 0.279579 | 0.585031 | 0.305452 | 5.086405 | 10.56116 | 0.000338 | 0.006487 | 4.684209 | 5.428384 | 4.963788 |
| ILMN_2722623 | Slc25a28  | 0.66412  | 0.688037 | 0.72974  | 0.041703 | 10.59233 | 10.5598  | 0.000338 | 0.006487 | 10.07186 | 10.73598 | 10.7599  |
| ILMN_1259355 | BC018601  | -0.75263 | -0.58472 | -0.41152 | 0.173195 | 7.60902  | 10.53256 | 0.000343 | 0.006572 | 8.046238 | 7.293606 | 7.46152  |
| ILMN_2622146 | Pcqap     | 0.688152 | 0.525274 | 0.66758  | 0.142306 | 8.010773 | 10.52742 | 0.000344 | 0.006582 | 7.540521 | 8.228673 | 8.065795 |

|              |           |          |          |          |          |          |          |          |          |          |          |          |
|--------------|-----------|----------|----------|----------|----------|----------|----------|----------|----------|----------|----------|----------|
| ILMN_2938179 | 1110002N2 | -0.88511 | -0.56262 | -0.80662 | -0.24401 | 8.038741 | 10.51164 | 0.000347 | 0.006618 | 8.602327 | 7.717221 | 8.039711 |
| ILMN_2606667 | Ddx6      | 0.875533 | 0.572438 | 0.992607 | 0.420169 | 6.968913 | 10.51156 | 0.000347 | 0.006618 | 6.358769 | 7.234302 | 6.931207 |
| ILMN_1216950 | D4Ertd22e | -0.8393  | -0.44467 | -0.73809 | -0.29343 | 8.541686 | 10.51057 | 0.000347 | 0.006618 | 9.047201 | 8.207898 | 8.602535 |
| ILMN_1242881 | Tmem4     | -0.6147  | -0.46356 | -0.44961 | 0.013958 | 10.31208 | 10.50346 | 0.000348 | 0.00663  | 10.69404 | 10.07935 | 10.23048 |
| ILMN_2689740 | Rg9mtd1   | -0.95338 | -1.0279  | -0.84665 | 0.181257 | 6.289263 | 10.50295 | 0.000348 | 0.00663  | 6.996245 | 6.042863 | 5.968343 |
| ILMN_2750258 | Mea1      | -0.51851 | -0.56169 | -0.80016 | -0.23847 | 7.876704 | 10.49802 | 0.000349 | 0.006637 | 8.346792 | 7.828285 | 7.785105 |
| ILMN_1215212 | Rhob      | -0.98904 | -0.65332 | -0.30004 | 0.353281 | 8.083732 | 10.49594 | 0.000349 | 0.006637 | 8.569332 | 7.58029  | 7.916012 |
| ILMN_2647172 | Serhl     | -0.71939 | -0.90413 | -0.91862 | -0.0145  | 9.050622 | 10.49466 | 0.00035  | 0.006637 | 9.686157 | 8.966769 | 8.782028 |
| ILMN_3123303 | Pxn       | 0.745623 | 0.519412 | 0.597156 | 0.077744 | 7.778152 | 10.49271 | 0.00035  | 0.006637 | 7.312604 | 8.058227 | 7.832016 |
| ILMN_1256883 | Rad51     | -0.00185 | -0.59758 | -0.87917 | -0.28159 | 5.603421 | 10.49018 | 0.00035  | 0.006638 | 5.97307  | 5.971219 | 5.375493 |
| ILMN_3004142 | Stk4      | 0.732161 | 0.430489 | 0.745678 | 0.315189 | 8.620141 | 10.48502 | 0.000351 | 0.006649 | 8.143059 | 8.87522  | 8.573548 |
| ILMN_2605512 | Lamb3     | 1.427968 | 1.977088 | 1.018471 | -0.95862 | 9.644571 | 10.47551 | 0.000353 | 0.006671 | 8.538689 | 9.966657 | 10.51578 |
| ILMN_1234685 | 4632419K2 | 0.581291 | 0.587766 | 0.709815 | 0.122049 | 9.806176 | 10.47461 | 0.000353 | 0.006671 | 9.336458 | 9.917749 | 9.924224 |
| ILMN_2662283 | 2010007H1 | -0.69724 | -0.45523 | -0.47353 | -0.0183  | 9.782315 | 10.46534 | 0.000355 | 0.006686 | 10.18881 | 9.491576 | 9.733585 |
| ILMN_2982192 | Mrpl13    | -0.71071 | -0.56262 | -0.69823 | -0.13561 | 11.409   | 10.46515 | 0.000355 | 0.006686 | 11.90189 | 11.19118 | 11.33927 |
| ILMN_1248415 | Tgoln1    | 0.917474 | 0.983661 | 0.335942 | -0.64772 | 9.501161 | 10.46392 | 0.000355 | 0.006686 | 8.941891 | 9.859366 | 9.925552 |
| ILMN_1244356 | 4121402DC | 0.724654 | 0.504638 | 0.800442 | 0.295804 | 6.711033 | 10.44606 | 0.000359 | 0.006742 | 6.2036   | 6.928254 | 6.708238 |
| ILMN_2756286 | D13Wsu64  | 1.208111 | 0.623866 | 0.76735  | 0.143485 | 6.057968 | 10.40574 | 0.000366 | 0.006878 | 5.408136 | 6.616247 | 6.032002 |
| ILMN_2693868 | Arhgap15  | -0.70006 | -0.50704 | -0.72928 | -0.22224 | 5.028911 | 10.40392 | 0.000367 | 0.006878 | 5.513006 | 4.812941 | 5.00597  |
| ILMN_1237208 | Lamp1     | 0.542371 | 0.557025 | 0.506617 | -0.05041 | 12.57977 | 10.39567 | 0.000368 | 0.0069   | 12.17827 | 12.72064 | 12.7353  |
| ILMN_2800881 | A430005L1 | -0.71207 | -0.44849 | -0.7235  | -0.275   | 9.515012 | 10.39075 | 0.000369 | 0.00691  | 9.986026 | 9.27396  | 9.537532 |
| ILMN_2773464 | Phc1      | 0.757859 | 0.716667 | 0.739874 | 0.023207 | 6.784078 | 10.38557 | 0.00037  | 0.006922 | 6.230478 | 6.988337 | 6.947145 |
| ILMN_2858399 | D930001I2 | 1.091205 | 0.885605 | 0.503371 | -0.38223 | 8.219835 | 10.3704  | 0.000373 | 0.00697  | 7.59979  | 8.690995 | 8.485395 |
| ILMN_2704048 | Sri       | -0.50548 | -0.8618  | -0.902   | -0.0402  | 9.848357 | 10.36055 | 0.000375 | 0.006997 | 10.41568 | 9.910196 | 9.553879 |
| ILMN_2881050 | Rad51     | -0.60288 | -0.78031 | -0.61195 | 0.168365 | 5.004857 | 10.35894 | 0.000375 | 0.006997 | 5.503642 | 4.900761 | 4.723331 |
| ILMN_1229370 | Podn      | 0.699102 | 0.892982 | 0.899986 | 0.007004 | 6.781849 | 10.35432 | 0.000376 | 0.007002 | 6.158831 | 6.857933 | 7.051813 |
| ILMN_2738156 | BC039093  | 1.130243 | 0.775991 | 1.153619 | 0.377628 | 8.185502 | 10.35266 | 0.000377 | 0.007002 | 7.420538 | 8.550782 | 8.196529 |
| ILMN_1225988 | Zdhhc3    | 0.768248 | 0.613809 | 0.656169 | 0.04236  | 6.442655 | 10.34915 | 0.000377 | 0.007002 | 5.933099 | 6.701347 | 6.546908 |
| ILMN_2690256 | Insig2    | -0.846   | -0.32425 | -0.3804  | -0.05615 | 9.122783 | 10.34897 | 0.000377 | 0.007002 | 9.510447 | 8.664447 | 9.186195 |
| ILMN_2879858 | Prkx      | 0.167365 | 0.665095 | 0.740556 | 0.075461 | 8.450472 | 10.34741 | 0.000378 | 0.007002 | 8.057218 | 8.224583 | 8.722314 |
| ILMN_1217041 | Cd86      | -0.59698 | 0.125201 | -0.41983 | -0.54503 | 6.828997 | 10.34012 | 0.000379 | 0.007021 | 7.051897 | 6.454921 | 7.177098 |
| ILMN_2804330 | Denr      | -0.66265 | -0.51054 | -0.52763 | -0.01709 | 6.417808 | 10.32884 | 0.000381 | 0.007056 | 6.843015 | 6.180367 | 6.332471 |
| ILMN_1258789 | Ythdf3    | -1.02277 | -0.43729 | -0.49055 | -0.05325 | 6.678289 | 10.29741 | 0.000388 | 0.007166 | 7.165941 | 6.143174 | 6.728648 |
| ILMN_2733398 | Sfrs3     | -0.62232 | -0.68674 | -0.58858 | 0.098161 | 7.901144 | 10.29428 | 0.000388 | 0.00717  | 8.375555 | 7.753232 | 7.688814 |
| ILMN_2667033 | BC003332  | 0.667349 | 0.342417 | 0.417158 | 0.074742 | 6.966383 | 10.28728 | 0.00039  | 0.007189 | 6.609652 | 7.277    | 6.952068 |

|              |            |          |          |          |          |          |          |          |          |          |          |          |
|--------------|------------|----------|----------|----------|----------|----------|----------|----------|----------|----------|----------|----------|
| ILMN_2734484 | 0610009B2  | -0.69381 | -0.89255 | -0.99469 | -0.10213 | 6.766862 | 10.2847  | 0.00039  | 0.007189 | 7.412124 | 6.718318 | 6.519571 |
| ILMN_2717199 | Sdf2       | -0.78615 | -0.2901  | -0.60755 | -0.31745 | 10.03733 | 10.28343 | 0.000391 | 0.007189 | 10.45828 | 9.672127 | 10.16818 |
| ILMN_2480180 | Vti1a      | 0.639451 | 0.402    | 0.34902  | -0.05298 | 7.380034 | 10.2782  | 0.000392 | 0.007201 | 7.032416 | 7.671866 | 7.434416 |
| ILMN_2973928 | Pop5       | -0.7213  | -0.38516 | -0.50319 | -0.11803 | 11.40383 | 10.27607 | 0.000392 | 0.007201 | 11.80624 | 11.08495 | 11.42108 |
| ILMN_2643057 | 1810073E2  | -0.77941 | -0.5033  | -0.64225 | -0.13895 | 8.660603 | 10.26879 | 0.000394 | 0.007215 | 9.141845 | 8.362431 | 8.638544 |
| ILMN_2666747 | E430034L0  | 0.689361 | 0.206196 | 0.504601 | 0.298405 | 9.706404 | 10.26778 | 0.000394 | 0.007215 | 9.356365 | 10.04573 | 9.562561 |
| ILMN_2880794 | Gapvd1     | 0.620021 | 0.27944  | 0.639747 | 0.360307 | 8.223377 | 10.2666  | 0.000394 | 0.007215 | 7.838576 | 8.458596 | 8.118015 |
| ILMN_2743244 | Cd86       | -0.69438 | 0.132494 | -0.53208 | -0.66458 | 7.071694 | 10.26466 | 0.000395 | 0.007215 | 7.345186 | 6.650809 | 7.47768  |
| ILMN_1234521 | Ndufs4     | -0.53065 | -0.44143 | -0.69959 | -0.25815 | 12.24233 | 10.25122 | 0.000397 | 0.007257 | 12.66024 | 12.12959 | 12.21881 |
| ILMN_1244330 | Jtv1       | -0.36144 | -0.37122 | -0.7571  | -0.38588 | 9.066857 | 10.249   | 0.000398 | 0.007257 | 9.439294 | 9.077858 | 9.068079 |
| ILMN_1227579 | Acot11     | 1.296054 | 0.746082 | 0.819616 | 0.073534 | 8.933822 | 10.24772 | 0.000398 | 0.007257 | 8.218384 | 9.514438 | 8.964466 |
| ILMN_2635871 | 3110057O1  | -0.74084 | -0.80465 | -0.63615 | 0.168501 | 6.061622 | 10.24301 | 0.000399 | 0.007267 | 6.60703  | 5.866192 | 5.802382 |
| ILMN_2737658 | Pdk2       | 0.812366 | 0.708696 | 0.637004 | -0.07169 | 7.124209 | 10.23353 | 0.000401 | 0.007296 | 6.584692 | 7.397059 | 7.293388 |
| ILMN_2885532 | Cpt2       | 0.963348 | 0.506864 | 0.239385 | -0.26748 | 10.51522 | 10.22713 | 0.000402 | 0.007313 | 10.08782 | 11.05117 | 10.59468 |
| ILMN_2605666 | Lamp2      | -0.62506 | -0.01495 | 0.276038 | 0.290992 | 9.628029 | 10.2111  | 0.000406 | 0.007348 | 9.719023 | 9.093963 | 9.704069 |
| ILMN_1223045 | 2810417H1  | -0.34256 | -0.68585 | -0.9848  | -0.29894 | 7.8795   | 10.2102  | 0.000406 | 0.007348 | 8.382802 | 8.040241 | 7.696951 |
| ILMN_2789425 | Polb       | -0.71871 | -0.36375 | -0.66286 | -0.29911 | 6.177604 | 10.20727 | 0.000407 | 0.007348 | 6.613934 | 5.895223 | 6.250185 |
| ILMN_2724643 | D1Wsu40e   | 0.06689  | -0.37797 | -0.66687 | -0.2889  | 7.765522 | 10.20701 | 0.000407 | 0.007348 | 8.010009 | 8.076899 | 7.632039 |
| ILMN_2619634 | Cfdp1      | -0.68349 | -0.46402 | -0.59783 | -0.1338  | 7.960375 | 10.20688 | 0.000407 | 0.007348 | 8.396711 | 7.713219 | 7.932686 |
| ILMN_3162431 | Al846148   | -0.92553 | -0.17689 | -0.35256 | -0.17567 | 6.447544 | 10.20657 | 0.000407 | 0.007348 | 6.811288 | 5.885761 | 6.634395 |
| ILMN_1244819 | Spg20      | 1.186159 | 1.012019 | 1.034244 | 0.022224 | 7.509433 | 10.20393 | 0.000407 | 0.00735  | 6.701327 | 7.887487 | 7.713347 |
| ILMN_2607972 | 9130221H1  | 0.808812 | 0.519388 | 0.792394 | 0.273006 | 6.335508 | 10.19727 | 0.000409 | 0.007369 | 5.805359 | 6.614172 | 6.324748 |
| ILMN_2946760 | Ankrd56    | 0.374199 | 0.448871 | 0.643641 | 0.19477  | 10.40919 | 10.18961 | 0.000411 | 0.007391 | 10.04252 | 10.41672 | 10.49139 |
| ILMN_3160568 | Ankrd50    | 0.735742 | 0.793852 | 0.818792 | 0.024939 | 6.682766 | 10.1835  | 0.000412 | 0.007407 | 6.09567  | 6.831412 | 6.889522 |
| ILMN_2914416 | Ncstn      | 0.568242 | 0.602993 | 0.544025 | -0.05897 | 11.03638 | 10.17642 | 0.000413 | 0.007428 | 10.60756 | 11.17581 | 11.21056 |
| ILMN_1224116 | Smpdl3a    | -0.70754 | -0.882   | -0.44133 | 0.440664 | 10.19273 | 10.17184 | 0.000414 | 0.007438 | 10.70045 | 9.99291  | 9.818454 |
| ILMN_1215639 | Comm1d1    | -0.9323  | -0.61097 | -0.89794 | -0.28697 | 7.232099 | 10.16318 | 0.000416 | 0.007457 | 7.842401 | 6.910103 | 7.231433 |
| ILMN_1237964 | Sh3yl1     | -0.86519 | -0.59459 | -0.34347 | 0.251121 | 9.934785 | 10.16268 | 0.000416 | 0.007457 | 10.3856  | 9.520409 | 9.791006 |
| ILMN_2608574 | 1110025I0! | -0.62616 | -0.42666 | -0.61931 | -0.19265 | 8.319524 | 10.1612  | 0.000417 | 0.007457 | 8.737553 | 8.111398 | 8.310896 |
| ILMN_2809239 | Tmem85     | -0.47118 | -0.37614 | -0.48824 | -0.1121  | 10.87164 | 10.1583  | 0.000417 | 0.007461 | 11.20553 | 10.73435 | 10.82939 |
| ILMN_2659440 | Zfand2b    | -0.85243 | -0.44278 | -0.42325 | 0.019539 | 8.123348 | 10.15385 | 0.000418 | 0.007468 | 8.552964 | 7.700531 | 8.11018  |
| ILMN_2826916 | Ptpre      | 0.498327 | 0.641876 | 0.873492 | 0.231615 | 8.175658 | 10.15108 | 0.000419 | 0.007468 | 7.672234 | 8.170561 | 8.31411  |
| ILMN_2801746 | Chchd6     | -0.72603 | -0.33382 | -0.78481 | -0.45099 | 7.056515 | 10.15072 | 0.000419 | 0.007468 | 7.51768  | 6.791653 | 7.18386  |
| ILMN_2618461 | Magmas     | -0.95456 | -0.62554 | -0.72634 | -0.1008  | 8.891891 | 10.14264 | 0.000421 | 0.007493 | 9.4685   | 8.513941 | 8.84296  |
| ILMN_1244187 | 2310057G1  | -0.84836 | -0.8245  | -0.97864 | -0.15414 | 6.316538 | 10.13267 | 0.000423 | 0.007525 | 6.979413 | 6.13105  | 6.154912 |

|              |           |          |          |          |          |          |          |          |          |          |          |          |
|--------------|-----------|----------|----------|----------|----------|----------|----------|----------|----------|----------|----------|----------|
| ILMN_2879745 | Lasp1     | 1.035034 | 0.817695 | 1.019674 | 0.201979 | 7.755435 | 10.12148 | 0.000426 | 0.007557 | 7.037334 | 8.072368 | 7.855029 |
| ILMN_2981818 | Mrps7     | -0.62362 | -0.50945 | -0.62518 | -0.11572 | 10.48059 | 10.12007 | 0.000426 | 0.007557 | 10.92015 | 10.29654 | 10.4107  |
| ILMN_1228475 | Ulk1      | 0.336929 | 0.651771 | 0.652834 | 0.001062 | 7.157277 | 10.11891 | 0.000426 | 0.007557 | 6.746893 | 7.083822 | 7.398664 |
| ILMN_2763951 | Zfand2b   | -0.70769 | -0.35565 | -0.4315  | -0.07585 | 9.150006 | 10.11323 | 0.000428 | 0.007573 | 9.523716 | 8.816022 | 9.168067 |
| ILMN_2618423 | BC003332  | 0.931253 | 0.691516 | 0.512682 | -0.17883 | 5.875567 | 10.10025 | 0.000431 | 0.007618 | 5.341704 | 6.272956 | 6.03322  |
| ILMN_2616000 | 5730449L1 | -0.78556 | -0.7012  | -0.65339 | 0.047817 | 7.867098 | 10.09835 | 0.000431 | 0.007618 | 8.402136 | 7.616574 | 7.700934 |
| ILMN_2908874 | Ccdc132   | -0.42326 | -0.41524 | -0.56305 | -0.1478  | 7.276707 | 10.09146 | 0.000433 | 0.007638 | 7.627093 | 7.203838 | 7.211852 |
| ILMN_2694074 | 2810037CC | -0.50469 | -0.37738 | -0.55481 | -0.17743 | 9.566713 | 10.08599 | 0.000434 | 0.007653 | 9.925935 | 9.421246 | 9.54855  |
| ILMN_2979824 | Rgs5      | -0.33183 | 0.524107 | 1.05015  | 0.526043 | 7.744374 | 10.07711 | 0.000436 | 0.007681 | 7.433766 | 7.101939 | 7.957873 |
| ILMN_2965417 | Npm3-ps1  | -0.72738 | -0.36754 | -0.42071 | -0.05318 | 11.56028 | 10.06795 | 0.000438 | 0.007711 | 11.93918 | 11.2118  | 11.57165 |
| ILMN_2604806 | 1110012L1 | -0.71608 | -0.68043 | -0.71103 | -0.03059 | 7.400756 | 10.05406 | 0.000441 | 0.007756 | 7.927641 | 7.211558 | 7.24721  |
| ILMN_2680128 | 3110050K2 | 0.801918 | 0.715797 | 1.275952 | 0.560155 | 5.962869 | 10.05189 | 0.000442 | 0.007756 | 5.264452 | 6.06637  | 5.980249 |
| ILMN_2745240 | 3110052NC | -0.4751  | -0.64774 | -0.81774 | -0.17    | 6.785336 | 10.05139 | 0.000442 | 0.007756 | 7.270479 | 6.795384 | 6.62274  |
| ILMN_1377924 | Gapd      | 0.725428 | 0.465051 | 0.425724 | -0.03933 | 12.92833 | 10.0484  | 0.000443 | 0.007761 | 12.52428 | 13.24971 | 12.98933 |
| ILMN_2960308 | Hspe1     | -1.04854 | -1.18334 | -1.16822 | 0.015123 | 7.801324 | 10.04122 | 0.000444 | 0.007783 | 8.65135  | 7.602807 | 7.468008 |
| ILMN_2852533 | Ahcy      | 1.12293  | 1.011648 | 0.194395 | -0.81725 | 8.479618 | 10.02146 | 0.000449 | 0.007858 | 7.897375 | 9.020305 | 8.909023 |
| ILMN_2793442 | Ssx2ip    | 0.606839 | 0.117405 | 0.346497 | 0.229092 | 9.13931  | 10.01786 | 0.00045  | 0.007862 | 8.871625 | 9.478464 | 8.98903  |
| ILMN_2868131 | Pigt      | 0.854312 | 0.598033 | 0.760188 | 0.162155 | 8.046523 | 10.01682 | 0.00045  | 0.007862 | 7.493389 | 8.347702 | 8.091423 |
| ILMN_3130403 | BC004728  | -0.6838  | -0.16418 | -0.15681 | 0.007365 | 10.63917 | 10.01091 | 0.000452 | 0.007872 | 10.89037 | 10.20657 | 10.72619 |
| ILMN_2615855 | Hnrpa2b1  | 0.703329 | 0.014925 | -0.06273 | -0.07765 | 10.49844 | 10.01061 | 0.000452 | 0.007872 | 10.33456 | 11.03789 | 10.34949 |
| ILMN_2624695 | Chchd4    | -0.70466 | -0.60774 | -0.80253 | -0.19479 | 9.642172 | 10.00188 | 0.000454 | 0.007901 | 10.1709  | 9.466247 | 9.563163 |
| ILMN_2883016 | Nav1      | 0.880756 | 0.753508 | 1.371069 | 0.617561 | 7.011943 | 9.999434 | 0.000454 | 0.007904 | 6.26061  | 7.141366 | 7.014118 |
| ILMN_1255513 | Cdr2      | 1.457612 | 1.029792 | 0.840425 | -0.18937 | 11.61085 | 9.995221 | 0.000456 | 0.007906 | 10.7789  | 12.23651 | 11.80869 |
| ILMN_2747507 | Pitpnm2   | 0.662637 | 0.594341 | 1.035127 | 0.440786 | 6.24421  | 9.994517 | 0.000456 | 0.007906 | 5.671184 | 6.333821 | 6.265525 |
| ILMN_2606130 | Nspc1     | -0.75279 | -0.33495 | -0.37168 | -0.03672 | 8.340649 | 9.993477 | 0.000456 | 0.007906 | 8.705503 | 7.952718 | 8.370549 |
| ILMN_2658219 | M6pr      | -0.00227 | -0.12791 | -0.62745 | -0.49954 | 6.732157 | 9.986343 | 0.000458 | 0.007928 | 6.921564 | 6.919291 | 6.793657 |
| ILMN_1213273 | Lrig3     | 0.500845 | 0.42112  | 0.526675 | 0.105555 | 9.141374 | 9.983178 | 0.000458 | 0.007934 | 8.779214 | 9.280059 | 9.200334 |
| ILMN_2689056 | Cd2bp2    | 0.497174 | 0.537893 | 0.693352 | 0.155458 | 8.592412 | 9.975211 | 0.00046  | 0.007957 | 8.160307 | 8.657481 | 8.6982   |
| ILMN_2972232 | Fbxl14    | 0.624915 | 0.353634 | 0.669831 | 0.316197 | 9.167619 | 9.973952 | 0.000461 | 0.007957 | 8.755524 | 9.380439 | 9.109158 |
| ILMN_1258682 | Map2k2    | 0.447269 | 0.472216 | 0.550974 | 0.078758 | 12.4822  | 9.971726 | 0.000461 | 0.007959 | 12.11459 | 12.56186 | 12.5868  |
| ILMN_2804622 | Med25     | 1.036243 | 0.573164 | 0.914373 | 0.341209 | 9.892674 | 9.965106 | 0.000463 | 0.00798  | 9.261728 | 10.29797 | 9.834892 |
| ILMN_1216122 | Mrpl48    | -0.05814 | -0.4064  | -0.68889 | -0.28249 | 10.14258 | 9.957761 | 0.000465 | 0.008003 | 10.43094 | 10.37279 | 10.02454 |
| ILMN_2614212 | Mapkapk2  | 0.375974 | 0.547015 | 0.60878  | 0.061765 | 9.312031 | 9.954885 | 0.000466 | 0.008008 | 8.929088 | 9.305063 | 9.476103 |
| ILMN_1255776 | BC017643  | -0.61398 | -0.54392 | -0.6461  | -0.10217 | 8.289591 | 9.946797 | 0.000468 | 0.008035 | 8.740593 | 8.126609 | 8.196668 |
| ILMN_3123889 | Zfp277    | -0.73255 | -0.37055 | -0.43462 | -0.06407 | 10.1711  | 9.944555 | 0.000468 | 0.008037 | 10.55553 | 9.82298  | 10.18498 |

|              |           |          |          |          |          |          |          |          |          |          |          |          |
|--------------|-----------|----------|----------|----------|----------|----------|----------|----------|----------|----------|----------|----------|
| ILMN_2693777 | BC013481  | 1.29957  | 1.012896 | 0.831379 | -0.18152 | 5.749881 | 9.942073 | 0.000469 | 0.00804  | 4.96392  | 6.26349  | 5.976816 |
| ILMN_2715270 | Slc5a1    | 0.873873 | 0.413151 | 0.701653 | 0.288502 | 11.40003 | 9.93621  | 0.00047  | 0.008057 | 10.90286 | 11.77674 | 11.31602 |
| ILMN_2639036 | Hspd1     | 1.194007 | -0.15693 | -0.2538  | -0.09687 | 8.547779 | 9.931001 | 0.000472 | 0.008066 | 8.351958 | 9.545965 | 8.195032 |
| ILMN_2469294 | Bicd2     | -0.76289 | -0.12568 | 0.024705 | 0.150387 | 7.520476 | 9.930132 | 0.000472 | 0.008066 | 7.736443 | 6.973552 | 7.610762 |
| ILMN_2636116 | Pdcd5     | -0.62126 | -0.5636  | -0.67922 | -0.11563 | 7.555282 | 9.928703 | 0.000472 | 0.008066 | 8.021302 | 7.400039 | 7.457707 |
| ILMN_2612079 | Rrbp1     | 0.760454 | 0.475564 | 0.387857 | -0.08771 | 10.28577 | 9.925163 | 0.000473 | 0.008073 | 9.879802 | 10.64026 | 10.35537 |
| ILMN_3145782 | Zfp97     | -1.35511 | -0.81494 | -0.47803 | 0.336901 | 6.791627 | 9.914909 | 0.000476 | 0.00811  | 7.453648 | 6.098535 | 6.638713 |
| ILMN_3113437 | Tmem2     | 0.494893 | 0.742332 | 1.036963 | 0.294631 | 5.668691 | 9.909627 | 0.000477 | 0.008113 | 5.100144 | 5.595036 | 5.842476 |
| ILMN_1231405 | Ncdn      | 0.773289 | 0.545809 | 0.848389 | 0.30258  | 6.429295 | 9.908998 | 0.000477 | 0.008113 | 5.887424 | 6.660712 | 6.433233 |
| ILMN_1225361 | Snrpd1    | -0.66259 | -0.42248 | -0.82205 | -0.39957 | 10.78716 | 9.9071   | 0.000478 | 0.008113 | 11.26394 | 10.60135 | 10.84147 |
| ILMN_3122427 | Suclg2    | 0.048885 | -0.37229 | -0.70112 | -0.32883 | 9.465288 | 9.906376 | 0.000478 | 0.008113 | 9.72142  | 9.770305 | 9.349127 |
| ILMN_2664660 | Aldh5a1   | 0.763738 | 0.169787 | 0.089276 | -0.08051 | 8.865377 | 9.905211 | 0.000478 | 0.008113 | 8.609677 | 9.373415 | 8.779464 |
| ILMN_2418324 | Usp54     | 0.329978 | 0.618455 | 0.616204 | -0.00225 | 6.191023 | 9.884115 | 0.000484 | 0.008192 | 5.799863 | 6.129841 | 6.418318 |
| ILMN_2640944 | Ndufs4    | -0.80517 | -0.77894 | -0.70046 | 0.078479 | 10.29065 | 9.883376 | 0.000484 | 0.008192 | 10.86179 | 10.05662 | 10.08285 |
| ILMN_2965066 | Herc4     | -1.02218 | -0.62315 | -0.65551 | -0.03236 | 6.870266 | 9.882034 | 0.000484 | 0.008192 | 7.445478 | 6.423296 | 6.822325 |
| ILMN_2681776 | Mapk6     | 1.186038 | 0.898172 | 0.820981 | -0.07719 | 10.67753 | 9.88012  | 0.000485 | 0.008192 | 9.95123  | 11.13727 | 10.8494  |
| ILMN_2733399 | Sfrs3     | -0.77359 | -0.65747 | -0.52303 | 0.134444 | 7.902342 | 9.873566 | 0.000486 | 0.008213 | 8.390864 | 7.61727  | 7.733394 |
| ILMN_2951682 | Cobl      | 0.719253 | 0.624379 | 0.58127  | -0.04311 | 10.01774 | 9.866424 | 0.000488 | 0.008224 | 9.536511 | 10.25576 | 10.16089 |
| ILMN_1252389 | Bat1a     | 0.744426 | 0.035115 | -0.23574 | -0.27086 | 6.354997 | 9.865906 | 0.000488 | 0.008224 | 6.219047 | 6.963473 | 6.254162 |
| ILMN_2639454 | Smu1      | 0.125719 | -0.49693 | -0.49185 | 0.005081 | 8.620742 | 9.864727 | 0.000489 | 0.008224 | 8.836506 | 8.962225 | 8.339578 |
| ILMN_2713305 | F11r      | 0.298643 | 0.673073 | 0.467202 | -0.20587 | 9.498555 | 9.859753 | 0.00049  | 0.008224 | 9.138825 | 9.437468 | 9.811898 |
| ILMN_2901227 | Tmem5     | -0.712   | -0.38856 | -0.45672 | -0.06815 | 9.116278 | 9.859571 | 0.00049  | 0.008224 | 9.505598 | 8.793594 | 9.117037 |
| ILMN_3121784 | A930008G  | 0.657638 | 0.708791 | 0.656147 | -0.05264 | 6.843104 | 9.859506 | 0.00049  | 0.008224 | 6.337461 | 6.995099 | 7.046251 |
| ILMN_1236539 | Pfkl      | 1.055169 | 0.647694 | 0.335491 | -0.3122  | 9.831201 | 9.858748 | 0.00049  | 0.008224 | 9.321613 | 10.37678 | 9.969306 |
| ILMN_2712305 | Dctn4     | -0.34453 | 0.026486 | 0.224224 | 0.197739 | 9.746082 | 9.849375 | 0.000493 | 0.008258 | 9.769538 | 9.425004 | 9.796024 |
| ILMN_2603647 | Ocil      | -0.9231  | -0.49307 | -0.53825 | -0.04517 | 11.44967 | 9.841653 | 0.000495 | 0.008284 | 11.93828 | 11.01518 | 11.4452  |
| ILMN_3071104 | Ap1g1     | 0.710525 | 0.266481 | 0.213834 | -0.05265 | 8.084015 | 9.834959 | 0.000497 | 0.008298 | 7.786305 | 8.49683  | 8.052786 |
| ILMN_2747381 | Ddx24     | 0.565323 | 0.170129 | 0.637022 | 0.466892 | 7.036585 | 9.834345 | 0.000497 | 0.008298 | 6.693466 | 7.258789 | 6.863595 |
| ILMN_2931095 | Igf2r     | 0.982734 | 0.938445 | 0.698107 | -0.24034 | 8.476805 | 9.83125  | 0.000498 | 0.008298 | 7.821984 | 8.804717 | 8.760429 |
| ILMN_2725232 | Ccnc      | -0.43213 | -0.58975 | -0.63149 | -0.04175 | 7.091805 | 9.830381 | 0.000498 | 0.008298 | 7.505147 | 7.073019 | 6.915399 |
| ILMN_1255342 | St14      | 0.653087 | 0.782324 | 0.641818 | -0.14051 | 9.032683 | 9.829848 | 0.000498 | 0.008298 | 8.513376 | 9.166463 | 9.2957   |
| ILMN_1239860 | 1810035L1 | -1.03635 | -0.6895  | -1.02308 | -0.33358 | 7.568016 | 9.809193 | 0.000504 | 0.008377 | 8.255251 | 7.218901 | 7.565746 |
| ILMN_2653567 | Rhoj      | -0.77938 | 0.187046 | 0.214147 | 0.027101 | 8.076438 | 9.807971 | 0.000504 | 0.008377 | 8.170985 | 7.391603 | 8.358031 |
| ILMN_2701035 | Rbm13     | 0.223783 | -0.27857 | -0.37393 | -0.09537 | 6.838999 | 9.807161 | 0.000504 | 0.008377 | 6.946179 | 7.169962 | 6.66761  |
| ILMN_2501719 | Ush1c     | 0.738993 | 0.148156 | 0.583769 | 0.435613 | 11.79695 | 9.798989 | 0.000507 | 0.008406 | 11.42922 | 12.16821 | 11.57737 |

|              |           |          |          |          |          |          |          |          |          |          |          |          |
|--------------|-----------|----------|----------|----------|----------|----------|----------|----------|----------|----------|----------|----------|
| ILMN_3095005 | Wiz       | 0.644596 | 0.469348 | 0.584491 | 0.115143 | 5.964978 | 9.794694 | 0.000508 | 0.008418 | 5.54037  | 6.184966 | 6.009717 |
| ILMN_2971131 | 3110001DC | -0.75558 | -0.36825 | -0.44029 | -0.07204 | 10.76593 | 9.790054 | 0.000509 | 0.008431 | 11.15696 | 10.40138 | 10.78871 |
| ILMN_1259683 | Dusp11    | 0.712586 | 0.457996 | 0.73925  | 0.281254 | 9.114103 | 9.785313 | 0.00051  | 0.008445 | 8.636644 | 9.349231 | 9.09464  |
| ILMN_2907989 | Zfp119    | -0.81299 | -0.36985 | -0.43356 | -0.06371 | 7.110448 | 9.776055 | 0.000513 | 0.008468 | 7.51455  | 6.701558 | 7.144696 |
| ILMN_2725789 | Khdrbs1   | 0.551231 | -0.04873 | -0.13261 | -0.08388 | 7.0907   | 9.775393 | 0.000513 | 0.008468 | 6.998229 | 7.54946  | 6.949496 |
| ILMN_1252545 | Mtap7     | 0.683368 | 1.034646 | 0.658593 | -0.37605 | 8.955917 | 9.774954 | 0.000513 | 0.008468 | 8.361765 | 9.045133 | 9.396411 |
| ILMN_1241638 | Prkwnk1   | 0.849667 | 0.613318 | 0.960455 | 0.347137 | 7.557042 | 9.769512 | 0.000515 | 0.008485 | 6.951182 | 7.800849 | 7.5645   |
| ILMN_2756041 | Pkm2      | 0.868929 | 0.450972 | 0.626707 | 0.175734 | 12.35549 | 9.757761 | 0.000518 | 0.008528 | 11.86884 | 12.73777 | 12.31981 |
| ILMN_1243741 | Rora      | 0.233819 | 0.531108 | 0.886653 | 0.355544 | 5.168722 | 9.755849 | 0.000519 | 0.008528 | 4.755827 | 4.989646 | 5.286936 |
| ILMN_2874443 | Polr2h    | -0.57692 | -0.66076 | -0.89024 | -0.22948 | 9.646373 | 9.755039 | 0.000519 | 0.008528 | 10.17835 | 9.601435 | 9.517595 |
| ILMN_1250574 | Nup43     | -0.60664 | -0.58756 | -0.82763 | -0.24007 | 8.27262  | 9.74661  | 0.000521 | 0.00856  | 8.778075 | 8.17144  | 8.190519 |
| ILMN_1260033 | Map1lc3b  | -1.01617 | -0.40575 | -0.2045  | 0.201251 | 6.979245 | 9.737914 | 0.000524 | 0.008592 | 7.385849 | 6.369679 | 6.9801   |
| ILMN_2851889 | Prkrip1   | -0.69367 | -0.68592 | -0.93029 | -0.24438 | 6.557874 | 9.734817 | 0.000525 | 0.008599 | 7.135344 | 6.441674 | 6.449428 |
| ILMN_2708397 | BC003885  | -0.13601 | -0.33724 | -0.78787 | -0.45063 | 8.062275 | 9.731853 | 0.000525 | 0.008605 | 8.377556 | 8.241549 | 8.040311 |
| ILMN_1226703 | Ndor1     | -1.24046 | -1.23651 | -0.51078 | 0.725737 | 6.118934 | 9.725212 | 0.000527 | 0.008628 | 6.865871 | 5.625411 | 5.629358 |
| ILMN_1233836 | Pon2      | 0.458855 | 0.524615 | 0.53908  | 0.014466 | 12.37191 | 9.718354 | 0.000529 | 0.008639 | 11.99128 | 12.45013 | 12.51589 |
| ILMN_2630756 | 1100001A2 | -0.85401 | -0.71133 | -0.75923 | -0.04789 | 7.19479  | 9.717869 | 0.000529 | 0.008639 | 7.775932 | 6.921922 | 7.064601 |
| ILMN_2685464 | D8Ertd594 | 0.241373 | 0.509434 | 0.929284 | 0.419851 | 7.197809 | 9.717688 | 0.00053  | 0.008639 | 6.777786 | 7.019159 | 7.287219 |
| ILMN_1225594 | 1110008P1 | -0.6202  | -0.41739 | -0.54391 | -0.12652 | 9.753655 | 9.712815 | 0.000531 | 0.008643 | 10.14903 | 9.52883  | 9.731641 |
| ILMN_1256219 | Sat1      | -0.7356  | -0.36809 | -0.55267 | -0.18458 | 11.97378 | 9.711993 | 0.000531 | 0.008643 | 12.38786 | 11.65227 | 12.01977 |
| ILMN_3038404 | Tcf25     | 0.714732 | 0.589999 | 1.225697 | 0.635698 | 5.72333  | 9.710099 | 0.000532 | 0.008643 | 5.090723 | 5.805455 | 5.680722 |
| ILMN_1249522 | Abcf2     | 0.615776 | -0.11257 | -0.0681  | 0.044476 | 7.382722 | 9.710052 | 0.000532 | 0.008643 | 7.273946 | 7.889722 | 7.161373 |
| ILMN_2715558 | Arhgap17  | 0.49689  | 0.517049 | 0.68774  | 0.170691 | 10.21143 | 9.706454 | 0.000533 | 0.008652 | 9.786006 | 10.2829  | 10.30306 |
| ILMN_1214090 | H47       | -0.58302 | -0.75345 | -0.76391 | -0.01046 | 10.24493 | 9.702127 | 0.000534 | 0.008664 | 10.77003 | 10.18701 | 10.01658 |
| ILMN_2653936 | B230339M  | 0.686538 | 0.422954 | 0.659082 | 0.236128 | 8.241708 | 9.696908 | 0.000536 | 0.008681 | 7.799564 | 8.486103 | 8.222519 |
| ILMN_2718349 | 9030221M  | 0.671777 | 0.250693 | -0.23436 | -0.48506 | 5.924038 | 9.690251 | 0.000538 | 0.008704 | 5.752011 | 6.423788 | 6.002704 |
| ILMN_2705349 | Nipa1     | -0.72057 | -0.46475 | -0.65714 | -0.19239 | 6.363908 | 9.688564 | 0.000538 | 0.008704 | 6.824522 | 6.103953 | 6.359771 |
| ILMN_2748837 | Aco2      | 0.612286 | 0.199389 | 0.383053 | 0.183664 | 12.22056 | 9.685454 | 0.000539 | 0.008711 | 11.92188 | 12.53416 | 12.12127 |
| ILMN_2612448 | Nfat5     | 0.709749 | 0.661559 | 1.03861  | 0.377052 | 7.9652   | 9.682695 | 0.00054  | 0.008716 | 7.36272  | 8.072469 | 8.024279 |
| ILMN_1223015 | Dedd2     | -0.91031 | -0.55209 | -0.23365 | 0.318441 | 9.313379 | 9.679882 | 0.000541 | 0.008722 | 9.737392 | 8.827084 | 9.1853   |
| ILMN_1215967 | Alg5      | -0.41928 | -0.3824  | -0.74662 | -0.36422 | 9.908294 | 9.676186 | 0.000542 | 0.008731 | 10.29537 | 9.87609  | 9.91297  |
| ILMN_2785104 | Sfrs7     | -0.64589 | -0.51397 | -0.38034 | 0.13363  | 8.798181 | 9.66877  | 0.000544 | 0.008751 | 9.18323  | 8.537343 | 8.669261 |
| ILMN_2911009 | EG241041  | -0.99688 | -0.94919 | -0.64173 | 0.307461 | 6.32488  | 9.66748  | 0.000544 | 0.008751 | 6.971829 | 5.974952 | 6.022639 |
| ILMN_1254929 | Rcl1      | 0.117805 | -0.31205 | -0.55167 | -0.23962 | 8.990561 | 9.666964 | 0.000544 | 0.008751 | 9.177041 | 9.294846 | 8.864989 |
| ILMN_1238285 | 4833420K1 | -0.96695 | -0.62877 | -0.62953 | -0.00075 | 7.761333 | 9.665127 | 0.000545 | 0.008752 | 8.317647 | 7.350693 | 7.688874 |

|              |           |          |          |          |          |          |          |          |          |          |          |          |
|--------------|-----------|----------|----------|----------|----------|----------|----------|----------|----------|----------|----------|----------|
| ILMN_2591570 | Stk11     | 0.552431 | 0.380259 | 0.73194  | 0.351681 | 8.341286 | 9.660878 | 0.000546 | 0.008764 | 7.925128 | 8.47756  | 8.305388 |
| ILMN_2669034 | Abcf2     | 0.696067 | 0.024593 | 0.025063 | 0.000469 | 7.56336  | 9.656494 | 0.000548 | 0.008777 | 7.37693  | 8.072996 | 7.401523 |
| ILMN_2952661 | Dbf4      | -0.64746 | -0.65588 | -0.55574 | 0.100146 | 7.384306 | 9.641369 | 0.000552 | 0.008842 | 7.849075 | 7.201618 | 7.193192 |
| ILMN_2726308 | Rpp21     | -0.59531 | -0.51411 | -0.30225 | 0.211859 | 10.27066 | 9.639626 | 0.000553 | 0.008843 | 10.62357 | 10.02826 | 10.10946 |
| ILMN_1229913 | Fundc1    | -0.63112 | -0.43771 | -0.61753 | -0.17982 | 8.680706 | 9.620588 | 0.000558 | 0.008919 | 9.102296 | 8.471177 | 8.664587 |
| ILMN_2802611 | Tm9sf2    | -0.97667 | -0.55112 | -0.41657 | 0.134546 | 7.402501 | 9.620575 | 0.000558 | 0.008919 | 7.888591 | 6.91192  | 7.337474 |
| ILMN_2780205 | Ctnna1    | 0.610056 | 0.391346 | 0.629139 | 0.237794 | 12.69444 | 9.617246 | 0.00056  | 0.008924 | 12.28681 | 12.89686 | 12.67815 |
| ILMN_1248569 | Timm10    | -0.48869 | -0.47697 | -0.76143 | -0.28446 | 7.015704 | 9.616192 | 0.00056  | 0.008924 | 7.447478 | 6.958786 | 6.970507 |
| ILMN_2739843 | Metrn     | -0.77399 | -0.25595 | -0.23788 | 0.018062 | 7.515298 | 9.608588 | 0.000562 | 0.008946 | 7.832253 | 7.058262 | 7.576308 |
| ILMN_2869139 | A130010J1 | -0.48925 | -0.49723 | -0.80127 | -0.30404 | 6.427796 | 9.605366 | 0.000563 | 0.008946 | 6.874732 | 6.38548  | 6.377503 |
| ILMN_2699989 | 2510038A1 | -0.6005  | -0.26829 | -0.82485 | -0.55657 | 6.885799 | 9.604164 | 0.000564 | 0.008946 | 7.309209 | 6.708712 | 7.04092  |
| ILMN_2874662 | Dscr2     | -0.42944 | -0.52777 | -0.83206 | -0.30429 | 8.162327 | 9.60294  | 0.000564 | 0.008946 | 8.609644 | 8.180206 | 8.081871 |
| ILMN_2979052 | Nudt21    | -0.9987  | -0.77765 | -0.89026 | -0.11261 | 5.572966 | 9.602096 | 0.000564 | 0.008946 | 6.239619 | 5.240916 | 5.46197  |
| ILMN_2866752 | Bcap29    | -0.82013 | -0.45181 | -0.50428 | -0.05247 | 8.526355 | 9.600545 | 0.000565 | 0.008946 | 8.970411 | 8.150279 | 8.518602 |
| ILMN_2707967 | Man2b1    | 0.729459 | 0.569615 | 0.586849 | 0.017234 | 10.68502 | 9.600232 | 0.000565 | 0.008946 | 10.21354 | 10.943   | 10.78315 |
| ILMN_2591425 | Gucy1a3   | -0.63989 | 0.271733 | 0.367678 | 0.095945 | 8.966302 | 9.592536 | 0.000567 | 0.008976 | 8.966423 | 8.32653  | 9.238156 |
| ILMN_2998593 | 5230400G2 | -0.81855 | -0.87134 | -0.62852 | 0.242828 | 6.431686 | 9.588836 | 0.000568 | 0.008982 | 7.01129  | 6.192735 | 6.139946 |
| ILMN_1216493 | Suclg1    | 0.076624 | -0.23429 | -0.53399 | -0.2997  | 11.39029 | 9.58791  | 0.000569 | 0.008982 | 11.5632  | 11.63983 | 11.32891 |
| ILMN_2925872 | Ap1m2     | -0.53618 | -0.76151 | -0.7696  | -0.00809 | 8.82581  | 9.580805 | 0.000571 | 0.009009 | 9.342635 | 8.806456 | 8.58112  |
| ILMN_2662124 | Cops5     | -0.34168 | -0.55336 | -0.68064 | -0.12728 | 9.65994  | 9.576556 | 0.000572 | 0.009021 | 10.05386 | 9.712182 | 9.500499 |
| ILMN_1237375 | Scd1      | 3.047694 | 3.876356 | 1.21968  | -2.65668 | 10.89368 | 9.575098 | 0.000573 | 0.009021 | 8.857752 | 11.90545 | 12.73411 |
| ILMN_2734848 | Brd2      | 0.569958 | 0.575211 | 0.898489 | 0.323278 | 9.089462 | 9.558231 | 0.000578 | 0.009098 | 8.578548 | 9.148506 | 9.153758 |
| ILMN_2697433 | 4732495E1 | 0.825614 | 0.931402 | 0.888505 | -0.0429  | 10.63961 | 9.547606 | 0.000581 | 0.009143 | 9.978229 | 10.80384 | 10.90963 |
| ILMN_2953301 | Ap3d1     | 0.535068 | 0.496077 | 0.708783 | 0.212706 | 9.185305 | 9.543771 | 0.000583 | 0.009154 | 8.750323 | 9.285392 | 9.2464   |
| ILMN_3079421 | Pde6d     | -0.75578 | -0.51989 | -0.57268 | -0.05279 | 7.467903 | 9.541588 | 0.000583 | 0.009156 | 7.92999  | 7.174207 | 7.4101   |
| ILMN_1245860 | Nol5a     | 0.723496 | -0.05917 | -0.16813 | -0.10896 | 7.533536 | 9.534972 | 0.000585 | 0.009156 | 7.409489 | 8.132984 | 7.350317 |
| ILMN_2427178 | Trim41    | 0.622737 | 0.487368 | 0.630769 | 0.143401 | 7.743654 | 9.534921 | 0.000586 | 0.009156 | 7.308436 | 7.931173 | 7.795803 |
| ILMN_1255634 | 1810008A1 | -0.61291 | -0.1962  | -0.63288 | -0.43668 | 7.726952 | 9.534063 | 0.000586 | 0.009156 | 8.087448 | 7.474535 | 7.89125  |
| ILMN_1238743 | Lrrc19    | -0.47085 | -0.52595 | -0.48828 | 0.037672 | 4.701489 | 9.5326   | 0.000586 | 0.009156 | 5.072759 | 4.601905 | 4.54681  |
| ILMN_2984828 | Ly6e      | 1.000046 | 0.871055 | 0.558989 | -0.31207 | 8.896679 | 9.531041 | 0.000587 | 0.009156 | 8.289156 | 9.289202 | 9.160212 |
| ILMN_2698107 | Eif1a     | -0.55745 | -0.55232 | -0.50817 | 0.044147 | 9.501687 | 9.529736 | 0.000587 | 0.009156 | 9.906173 | 9.34872  | 9.353854 |
| ILMN_2595637 | 4732437J2 | 0.458949 | 0.361146 | 0.707347 | 0.346201 | 6.934658 | 9.526993 | 0.000588 | 0.009156 | 6.552797 | 7.011747 | 6.913943 |
| ILMN_2632076 | Ctps2     | 0.785375 | -0.03674 | 0.017728 | 0.054465 | 5.408084 | 9.525965 | 0.000588 | 0.009156 | 5.216493 | 6.001868 | 5.179755 |
| ILMN_2601515 | Bpnt1     | 0.398412 | -0.13404 | -0.36599 | -0.23195 | 9.650481 | 9.525806 | 0.000588 | 0.009156 | 9.675884 | 10.0743  | 9.541847 |
| ILMN_2893879 | Gdpd3     | -0.94098 | -0.44447 | -0.88062 | -0.43616 | 6.47916  | 9.525469 | 0.000589 | 0.009156 | 7.045677 | 6.104695 | 6.601211 |



|              |           |          |          |          |          |          |          |          |          |          |          |          |
|--------------|-----------|----------|----------|----------|----------|----------|----------|----------|----------|----------|----------|----------|
| ILMN_2479786 | Ubqln1    | 1.025051 | 0.530733 | 0.15679  | -0.37394 | 6.863681 | 9.518025 | 0.000591 | 0.009186 | 6.435538 | 7.460588 | 6.966271 |
| ILMN_2660182 | Acot7     | 0.157042 | -0.53808 | -0.57016 | -0.03208 | 8.069332 | 9.507922 | 0.000594 | 0.009229 | 8.30713  | 8.464172 | 7.769053 |
| ILMN_1249905 | D2Bwg089  | -0.7956  | -0.49825 | -0.35591 | 0.142336 | 11.78732 | 9.501031 | 0.000597 | 0.009256 | 12.19976 | 11.40415 | 11.70151 |
| ILMN_2610706 | Hrsp12    | -0.37596 | -0.38297 | -0.82381 | -0.44084 | 7.612984 | 9.497234 | 0.000598 | 0.009267 | 8.00867  | 7.632715 | 7.625696 |
| ILMN_1227649 | Gss       | -0.2624  | -0.40232 | -0.78425 | -0.38193 | 8.428041 | 9.494977 | 0.000599 | 0.009271 | 8.790282 | 8.52788  | 8.387966 |
| ILMN_2660267 | Dnm1l     | -0.2148  | -0.59144 | -0.67272 | -0.08129 | 6.536557 | 9.490708 | 0.0006   | 0.009285 | 6.906297 | 6.691498 | 6.314861 |
| ILMN_1219173 | AF233884  | 0.120235 | -0.66762 | -0.77783 | -0.11021 | 5.636237 | 9.476818 | 0.000605 | 0.009348 | 5.96754  | 6.087775 | 5.299922 |
| ILMN_2936351 | Matr3     | -0.75952 | -0.29573 | -0.10035 | 0.195381 | 11.28075 | 9.460558 | 0.00061  | 0.009414 | 11.56965 | 10.81014 | 11.27392 |
| ILMN_1239525 | Polr2j    | -0.50439 | -0.36289 | -0.57446 | -0.21157 | 10.78632 | 9.459565 | 0.00061  | 0.009414 | 11.14676 | 10.64236 | 10.78387 |
| ILMN_2619574 | Slc35e3   | 1.567928 | 1.51134  | 1.008468 | -0.50287 | 9.104555 | 9.4594   | 0.000611 | 0.009414 | 8.08262  | 9.650549 | 9.59396  |
| ILMN_3125363 | Frda      | -0.49088 | -0.4593  | -0.77776 | -0.31845 | 9.393332 | 9.456393 | 0.000612 | 0.009421 | 9.825316 | 9.334439 | 9.366014 |
| ILMN_2719888 | G3bp      | 0.768292 | -0.36747 | -0.27324 | 0.094228 | 7.24199  | 9.442235 | 0.000616 | 0.009487 | 7.210095 | 7.978388 | 6.842624 |
| ILMN_2507182 | Tomm22    | -0.57591 | -0.38678 | -0.40061 | -0.01384 | 10.98357 | 9.437831 | 0.000618 | 0.009502 | 11.32439 | 10.74848 | 10.93761 |
| ILMN_2790486 | Atp5f1    | -0.1528  | -0.31585 | -0.56521 | -0.24936 | 12.25856 | 9.432376 | 0.00062  | 0.009511 | 12.51702 | 12.36423 | 12.20117 |
| ILMN_1229706 | E230022HC | 0.488966 | 0.356297 | 0.722678 | 0.366381 | 7.613445 | 9.431731 | 0.00062  | 0.009511 | 7.22146  | 7.710426 | 7.577757 |
| ILMN_2872246 | 1810009A1 | -0.69859 | -0.69349 | -0.59517 | 0.098326 | 6.506622 | 9.429312 | 0.000621 | 0.009511 | 7.003433 | 6.304847 | 6.309942 |
| ILMN_2980044 | Asah2     | 0.705195 | 0.756365 | 0.973602 | 0.217237 | 12.45696 | 9.428894 | 0.000621 | 0.009511 | 11.84817 | 12.55337 | 12.60454 |
| ILMN_2744439 | Hdgf      | 0.766929 | 0.36643  | 0.493121 | 0.126691 | 7.53504  | 9.428166 | 0.000621 | 0.009511 | 7.12842  | 7.895349 | 7.49485  |
| ILMN_1237265 | Mrpl28    | -0.51038 | -0.39634 | -0.6405  | -0.24416 | 11.45018 | 9.425119 | 0.000622 | 0.009519 | 11.83699 | 11.3266  | 11.44065 |
| ILMN_1214167 | Commd10   | -0.34224 | -0.42981 | -0.66637 | -0.23656 | 8.100327 | 9.420654 | 0.000624 | 0.009534 | 8.459931 | 8.117694 | 8.030124 |
| ILMN_2963223 | Rab22a    | 0.694692 | 0.619466 | 0.996727 | 0.377261 | 5.992828 | 9.408693 | 0.000628 | 0.009585 | 5.415107 | 6.109799 | 6.034573 |
| ILMN_3105499 | Dlgap4    | 0.551188 | 0.368996 | 0.830872 | 0.461876 | 6.486509 | 9.408031 | 0.000628 | 0.009585 | 6.048745 | 6.599934 | 6.417741 |
| ILMN_2622255 | Ephb2     | 1.040816 | 0.698752 | 0.745757 | 0.047006 | 6.998966 | 9.405144 | 0.000629 | 0.009586 | 6.377635 | 7.418451 | 7.076386 |
| ILMN_2476804 | Ube2a     | -0.87079 | -1.12484 | -0.83011 | 0.294726 | 7.274456 | 9.404738 | 0.000629 | 0.009586 | 7.98089  | 7.110101 | 6.856053 |
| ILMN_2758452 | Hn1       | -0.72405 | -0.5154  | -0.48032 | 0.035081 | 9.167034 | 9.396592 | 0.000632 | 0.009604 | 9.596978 | 8.872932 | 9.081574 |
| ILMN_2697248 | Tegt      | 0.459626 | 0.487275 | 0.494423 | 0.007148 | 14.01109 | 9.396367 | 0.000632 | 0.009604 | 13.65076 | 14.11038 | 14.13803 |
| ILMN_2680308 | Sec14l1   | 0.731783 | 0.828463 | 0.512581 | -0.31588 | 5.67708  | 9.395038 | 0.000633 | 0.009604 | 5.158873 | 5.890656 | 5.987336 |
| ILMN_1245447 | Abcd1     | 0.991471 | 0.584994 | 0.481017 | -0.10398 | 9.067266 | 9.393844 | 0.000633 | 0.009604 | 8.552896 | 9.544367 | 9.13789  |
| ILMN_2597249 | Abcb9     | 0.60705  | 0.64085  | 0.599644 | -0.04121 | 7.635696 | 9.39348  | 0.000633 | 0.009604 | 7.17381  | 7.78086  | 7.81466  |
| ILMN_2642158 | Atp5s     | -0.31834 | -0.45431 | -0.60761 | -0.1533  | 7.601411 | 9.381761 | 0.000638 | 0.009655 | 7.946475 | 7.628133 | 7.49217  |
| ILMN_2603187 | Mecp2     | 0.651655 | 0.526317 | 0.781017 | 0.254699 | 6.579381 | 9.380677 | 0.000638 | 0.009655 | 6.089634 | 6.741289 | 6.615951 |
| ILMN_3019002 | Fusip1    | -0.31511 | -0.62649 | -0.81202 | -0.18552 | 6.763079 | 9.377401 | 0.000639 | 0.009655 | 7.201484 | 6.886372 | 6.574991 |
| ILMN_2714874 | 4931431L1 | -0.59038 | -0.48319 | -0.15201 | 0.331182 | 7.409012 | 9.377283 | 0.000639 | 0.009655 | 7.715406 | 7.125025 | 7.232218 |
| ILMN_2596412 | Copg      | 0.716828 | 0.458176 | 0.524723 | 0.066547 | 8.853042 | 9.376231 | 0.000639 | 0.009655 | 8.42811  | 9.144938 | 8.886287 |
| ILMN_1250816 | Apeh      | 0.612446 | 0.307952 | 0.424267 | 0.116315 | 11.88026 | 9.370558 | 0.000642 | 0.009664 | 11.54409 | 12.15654 | 11.85204 |

|              |           |          |          |          |          |          |          |          |          |          |          |          |
|--------------|-----------|----------|----------|----------|----------|----------|----------|----------|----------|----------|----------|----------|
| ILMN_2694962 | Pcsk7     | 0.539899 | 0.655277 | 0.656727 | 0.00145  | 9.162488 | 9.370454 | 0.000642 | 0.009664 | 8.699512 | 9.239412 | 9.354789 |
| ILMN_3132361 | Ncoa4     | 1.033909 | 0.37231  | 0.300422 | -0.07189 | 7.908759 | 9.369892 | 0.000642 | 0.009664 | 7.482099 | 8.516008 | 7.854409 |
| ILMN_2787396 | Mrps22    | -0.53542 | -0.50026 | -0.77529 | -0.27502 | 9.81144  | 9.364811 | 0.000644 | 0.009683 | 10.26418 | 9.728765 | 9.763918 |
| ILMN_2773302 | Rngtt     | -0.46245 | -0.66595 | -0.51088 | 0.155069 | 6.50063  | 9.36338  | 0.000644 | 0.009683 | 6.910451 | 6.448004 | 6.244497 |
| ILMN_1233402 | Syt11     | 0.893969 | 0.847879 | 0.88676  | 0.03888  | 6.93517  | 9.357855 | 0.000646 | 0.009699 | 6.278018 | 7.171988 | 7.125897 |
| ILMN_2626653 | Fxc1      | -0.84134 | -0.51633 | -0.70547 | -0.18914 | 9.542264 | 9.35565  | 0.000647 | 0.009699 | 10.05805 | 9.21671  | 9.54172  |
| ILMN_2828819 | Lig3      | 0.631681 | 0.059832 | 0.336241 | 0.276409 | 6.166308 | 9.354644 | 0.000647 | 0.009699 | 5.90937  | 6.54105  | 5.969202 |
| ILMN_2752224 | Mrps28    | -0.58577 | -0.50525 | -0.72144 | -0.21619 | 9.709606 | 9.354142 | 0.000647 | 0.009699 | 10.16272 | 9.576948 | 9.657471 |
| ILMN_2760043 | Fnbp3     | -0.7208  | -0.80544 | -0.7452  | 0.060242 | 6.663875 | 9.351424 | 0.000648 | 0.009699 | 7.231737 | 6.510933 | 6.426294 |
| ILMN_1246740 | Slc35b1   | -0.63682 | -0.20403 | -0.34771 | -0.14368 | 10.47468 | 9.351149 | 0.000649 | 0.009699 | 10.77183 | 10.13501 | 10.56779 |
| ILMN_3140516 | Rapgef1   | 0.599781 | 0.466798 | 0.648596 | 0.181798 | 7.802944 | 9.34603  | 0.00065  | 0.009705 | 7.37415  | 7.973932 | 7.840949 |
| ILMN_1239724 | Psmb1     | -0.58227 | -0.43244 | -0.53146 | -0.09903 | 12.16464 | 9.344398 | 0.000651 | 0.009705 | 12.55118 | 11.96891 | 12.11875 |
| ILMN_2883795 | Dcun1d4   | 0.774175 | 0.68366  | 0.50991  | -0.17375 | 7.736598 | 9.343176 | 0.000651 | 0.009705 | 7.244661 | 8.018837 | 7.928322 |
| ILMN_3163481 | 1810044A2 | 1.168426 | 0.62134  | 0.521784 | -0.09956 | 6.775125 | 9.343088 | 0.000651 | 0.009705 | 6.197237 | 7.365664 | 6.818578 |
| ILMN_3096750 | Seh1l     | -0.33711 | -0.55414 | -0.77591 | -0.22177 | 7.555801 | 9.342275 | 0.000652 | 0.009705 | 7.972588 | 7.63548  | 7.418453 |
| ILMN_1234930 | Wbscr24   | -0.44947 | 0.134846 | 0.137003 | 0.002157 | 5.38005  | 9.337826 | 0.000653 | 0.009716 | 5.424456 | 4.974986 | 5.559302 |
| ILMN_1254386 | 8430432M  | -0.66923 | -0.36002 | -0.4594  | -0.09938 | 7.577607 | 9.337245 | 0.000654 | 0.009716 | 7.949769 | 7.280541 | 7.589748 |
| ILMN_2604226 | Sema5a    | 1.113445 | 0.819398 | 1.4067   | 0.587301 | 8.203748 | 9.334391 | 0.000655 | 0.009719 | 7.368862 | 8.482308 | 8.18826  |
| ILMN_1234516 | 2410022L0 | -0.87122 | -0.54251 | -0.85413 | -0.31162 | 8.204706 | 9.333674 | 0.000655 | 0.009719 | 8.771673 | 7.90045  | 8.229162 |
| ILMN_2970691 | Ppie      | -0.48533 | -0.13312 | -0.61424 | -0.48111 | 7.631845 | 9.330397 | 0.000656 | 0.009729 | 7.940018 | 7.454684 | 7.806893 |
| ILMN_2728431 | Cdc42ep4  | 0.632315 | 0.546066 | 0.596469 | 0.050403 | 9.633585 | 9.316681 | 0.000661 | 0.009794 | 9.189873 | 9.822188 | 9.735939 |
| ILMN_2833378 | Prkaca    | 0.560117 | 0.31778  | 0.425505 | 0.107725 | 8.348513 | 9.315097 | 0.000662 | 0.009794 | 8.022662 | 8.582779 | 8.340442 |
| ILMN_2941033 | Papolg    | -0.78521 | -0.35386 | -0.29485 | 0.059014 | 7.347311 | 9.313864 | 0.000662 | 0.009794 | 7.705791 | 6.920581 | 7.35193  |
| ILMN_2885277 | Nnmt      | -1.45107 | -0.42486 | -0.67192 | -0.24706 | 6.936576 | 9.30959  | 0.000664 | 0.009809 | 7.573539 | 6.12247  | 7.148676 |
| ILMN_2974280 | 2510012J0 | 0.654543 | 0.245201 | 0.545809 | 0.300608 | 7.799798 | 9.307898 | 0.000664 | 0.00981  | 7.438409 | 8.092952 | 7.68361  |
| ILMN_2679456 | Crat      | 1.375213 | 1.147859 | 0.862388 | -0.28547 | 8.985091 | 9.304316 | 0.000666 | 0.009822 | 8.138727 | 9.513939 | 9.286585 |
| ILMN_2685133 | 1700034H1 | -0.66928 | -0.55656 | -0.71935 | -0.16279 | 9.760808 | 9.289517 | 0.000671 | 0.009895 | 10.24711 | 9.577821 | 9.690547 |
| ILMN_1256518 | Akr7a5    | 0.622748 | 0.288466 | 0.288218 | -0.00025 | 12.50499 | 9.287314 | 0.000672 | 0.009899 | 12.20514 | 12.82788 | 12.4936  |
| ILMN_2814431 | Ttc35     | -0.58101 | -0.46001 | -0.2092  | 0.250817 | 10.73724 | 9.283523 | 0.000674 | 0.009912 | 11.04979 | 10.46878 | 10.58978 |
| ILMN_2933618 | Gemin7    | -0.77929 | -0.36719 | -0.64219 | -0.275   | 8.965621 | 9.280956 | 0.000675 | 0.009913 | 9.41279  | 8.633496 | 9.045601 |
| ILMN_1219466 | C130074G1 | 0.537992 | 0.814619 | 0.788123 | -0.0265  | 7.452025 | 9.280353 | 0.000675 | 0.009913 | 6.916842 | 7.454834 | 7.731461 |
| ILMN_2598775 | Stard3nl  | -0.75597 | -0.36268 | -0.40593 | -0.04325 | 9.322567 | 9.270465 | 0.000679 | 0.00996  | 9.703711 | 8.947739 | 9.341034 |
| ILMN_2997002 | Pigo      | 0.655965 | 0.55032  | 0.629831 | 0.079511 | 8.536078 | 9.268737 | 0.000679 | 0.009961 | 8.077049 | 8.733014 | 8.627369 |
| ILMN_2609457 | Gorasp2   | 0.466464 | 0.100463 | -0.12166 | -0.22212 | 9.511328 | 9.266001 | 0.00068  | 0.009963 | 9.400011 | 9.866475 | 9.500473 |
| ILMN_2946689 | Ttc7      | 0.935925 | 0.577927 | 0.624083 | 0.046156 | 7.875624 | 9.265417 | 0.00068  | 0.009963 | 7.34114  | 8.277065 | 7.919067 |

|              |           |          |          |          |          |          |          |          |          |          |          |          |
|--------------|-----------|----------|----------|----------|----------|----------|----------|----------|----------|----------|----------|----------|
| ILMN_2932824 | Gna-rs1   | 0.631576 | 0.534667 | 0.47652  | -0.05815 | 7.39464  | 9.258907 | 0.000683 | 0.009991 | 6.98395  | 7.615526 | 7.518616 |
| ILMN_2903379 | Memo1     | -0.82362 | -1.03622 | -0.96745 | 0.068763 | 5.566183 | 9.255187 | 0.000684 | 0.010001 | 6.273006 | 5.449386 | 5.236789 |
| ILMN_2767602 | Chic2     | -0.62192 | -0.14292 | -0.36549 | -0.22257 | 10.47499 | 9.254195 | 0.000685 | 0.010001 | 10.75757 | 10.13565 | 10.61466 |
| ILMN_2769065 | Sdhb      | -0.44624 | -0.64957 | -0.68664 | -0.03707 | 11.25293 | 9.250433 | 0.000686 | 0.010013 | 11.69855 | 11.25231 | 11.04897 |
| ILMN_1241606 | Appbp1    | -0.56654 | -0.45359 | -0.48288 | -0.02929 | 10.19574 | 9.246686 | 0.000688 | 0.010022 | 10.57149 | 10.00495 | 10.1179  |
| ILMN_1243654 | Hist1h4k  | -1.01308 | -0.4354  | -0.41966 | 0.015741 | 6.193771 | 9.243759 | 0.000689 | 0.010022 | 6.660806 | 5.64773  | 6.225403 |
| ILMN_2960474 | 111003110 | 0.701052 | 0.523008 | 0.28794  | -0.23507 | 8.500239 | 9.243079 | 0.000689 | 0.010022 | 8.122239 | 8.823291 | 8.645247 |
| ILMN_1225090 | Gdf9      | 0.922178 | 1.176303 | -0.07143 | -1.24773 | 7.126181 | 9.243013 | 0.000689 | 0.010022 | 6.619418 | 7.541596 | 7.795721 |
| ILMN_1253409 | Kcnj8     | -0.55692 | -0.10677 | 0.163743 | 0.270508 | 5.758075 | 9.240437 | 0.00069  | 0.010025 | 5.883061 | 5.326137 | 5.776296 |
| ILMN_2487517 | Ssfa2     | -0.49561 | 0.112185 | 0.415954 | 0.30377  | 10.37236 | 9.239442 | 0.00069  | 0.010025 | 10.36423 | 9.868621 | 10.47641 |
| ILMN_2704715 | 6330409N  | -1.22358 | -1.03534 | -1.02903 | 0.006317 | 6.110757 | 9.237272 | 0.000691 | 0.010029 | 6.932743 | 5.709166 | 5.8974   |
| ILMN_2683718 | Lrprrc    | 1.036248 | -0.0067  | -0.10222 | -0.09552 | 5.264367 | 9.230298 | 0.000694 | 0.01006  | 5.032536 | 6.068784 | 5.025831 |
| ILMN_2762509 | Ncdn      | 0.685762 | 0.39472  | 0.510629 | 0.115909 | 5.25988  | 9.221616 | 0.000697 | 0.010098 | 4.862102 | 5.547863 | 5.256822 |
| ILMN_1254256 | Actl6a    | -1.01915 | -0.9079  | -0.72193 | 0.185968 | 7.162366 | 9.220619 | 0.000698 | 0.010098 | 7.824609 | 6.805463 | 6.916712 |
| ILMN_2700334 | Bri3      | -0.53053 | -0.16411 | -0.28459 | -0.12048 | 12.42049 | 9.218363 | 0.000699 | 0.010103 | 12.66529 | 12.13476 | 12.50118 |
| ILMN_2492716 | Uaca      | 0.690634 | 0.572614 | 0.998809 | 0.426195 | 11.07997 | 9.215186 | 0.0007   | 0.010113 | 10.51446 | 11.20509 | 11.08707 |
| ILMN_2425415 | Ube3b     | 0.383723 | 0.343188 | 0.68819  | 0.345002 | 9.6559   | 9.211916 | 0.000701 | 0.010123 | 9.302125 | 9.685847 | 9.645313 |
| ILMN_2631994 | Clp1      | -0.66292 | -0.38149 | -0.42227 | -0.04078 | 8.98665  | 9.207244 | 0.000703 | 0.010133 | 9.353318 | 8.6904   | 8.971829 |
| ILMN_1217061 | Casp9     | 0.420742 | 0.539407 | 0.492382 | -0.04703 | 8.726311 | 9.206077 | 0.000704 | 0.010133 | 8.363178 | 8.78392  | 8.902585 |
| ILMN_2730926 | 2600001B1 | -0.05011 | -0.34954 | -0.58302 | -0.23348 | 7.648996 | 9.205621 | 0.000704 | 0.010133 | 7.894665 | 7.844559 | 7.545121 |
| ILMN_2755585 | Avpi1     | -0.89461 | -0.5825  | -0.80497 | -0.22247 | 6.96689  | 9.204295 | 0.000704 | 0.010133 | 7.537411 | 6.642804 | 6.954908 |
| ILMN_1255780 | 9030224M  | -0.42383 | 0.118244 | 0.450489 | 0.332245 | 5.576273 | 9.192077 | 0.000709 | 0.010189 | 5.540046 | 5.11622  | 5.65829  |
| ILMN_1213449 | Man2c1    | 0.693682 | 0.347169 | 0.579963 | 0.232795 | 8.186474 | 9.190569 | 0.00071  | 0.010189 | 7.781271 | 8.474953 | 8.12844  |
| ILMN_2534253 | LOC216963 | 0.628849 | 0.634238 | 0.797061 | 0.162823 | 5.201178 | 9.190183 | 0.00071  | 0.010189 | 4.686141 | 5.31499  | 5.320379 |
| ILMN_2674924 | Pcca      | -0.06422 | -0.4099  | -0.67057 | -0.26067 | 6.904029 | 9.185747 | 0.000712 | 0.010203 | 7.190201 | 7.125979 | 6.780301 |
| ILMN_2689678 | Ddx54     | 0.765322 | 0.281934 | 0.535701 | 0.253767 | 9.457121 | 9.184754 | 0.000712 | 0.010203 | 9.061382 | 9.826704 | 9.343315 |
| ILMN_2733193 | Cth       | 0.170596 | -0.2739  | -0.86333 | -0.58943 | 6.921453 | 9.180785 | 0.000714 | 0.010218 | 7.163113 | 7.333708 | 6.88921  |
| ILMN_1216764 | Ier3      | 0.346574 | 0.637698 | 0.856131 | 0.218433 | 8.715728 | 9.179315 | 0.000714 | 0.010218 | 8.255627 | 8.602201 | 8.893325 |
| ILMN_1246060 | C5300500  | -0.39274 | -0.63685 | -0.94653 | -0.30968 | 6.780884 | 9.176315 | 0.000716 | 0.010226 | 7.274915 | 6.882174 | 6.638065 |
| ILMN_1234604 | 2610036D1 | 0.742438 | 0.47494  | 0.555971 | 0.08103  | 6.347519 | 9.175012 | 0.000716 | 0.010226 | 5.904182 | 6.64662  | 6.379123 |
| ILMN_2717460 | Ndufb7    | -0.7244  | -0.49805 | -0.90581 | -0.40776 | 9.247773 | 9.160068 | 0.000722 | 0.010304 | 9.779837 | 9.055438 | 9.281789 |
| ILMN_1238114 | BC051227  | -0.74782 | -0.68057 | -0.60872 | 0.071851 | 8.350518 | 9.156118 | 0.000724 | 0.010319 | 8.859797 | 8.111973 | 8.179227 |
| ILMN_2613682 | Ace       | 1.427315 | 1.62799  | 1.034486 | -0.5935  | 8.466922 | 9.153498 | 0.000725 | 0.010326 | 7.444474 | 8.871789 | 9.072464 |
| ILMN_2645613 | BC016188  | 0.748782 | 0.565609 | 0.915446 | 0.349838 | 8.453372 | 9.151512 | 0.000726 | 0.010327 | 7.895913 | 8.644696 | 8.461522 |
| ILMN_2646001 | 1110008J0 | -0.71869 | -0.2917  | -0.40709 | -0.11539 | 6.277248 | 9.150425 | 0.000726 | 0.010327 | 6.631618 | 5.912933 | 6.339916 |

|              |           |          |          |          |          |          |          |          |          |          |          |          |
|--------------|-----------|----------|----------|----------|----------|----------|----------|----------|----------|----------|----------|----------|
| ILMN_2967362 | 1110057KC | 0.849665 | 0.487124 | 0.550832 | 0.063707 | 9.112858 | 9.148316 | 0.000727 | 0.010328 | 8.640952 | 9.490618 | 9.128077 |
| ILMN_2673024 | Mrps24    | -0.58861 | -0.33854 | -0.36754 | -0.029   | 12.51597 | 9.146889 | 0.000728 | 0.010328 | 12.83965 | 12.25103 | 12.50111 |
| ILMN_2666406 | 1190002CC | 0.843634 | 0.569583 | 0.4315   | -0.13808 | 10.53957 | 9.145848 | 0.000728 | 0.010328 | 10.07839 | 10.92202 | 10.64797 |
| ILMN_2674032 | 2810021O  | -0.4973  | -0.29305 | -0.5208  | -0.22776 | 9.461744 | 9.137847 | 0.000731 | 0.010367 | 9.789532 | 9.292233 | 9.496484 |
| ILMN_2733185 | Cdc42ep3  | -0.51785 | -0.43933 | 0.19859  | 0.637918 | 6.673433 | 9.135734 | 0.000732 | 0.010371 | 6.863081 | 6.345227 | 6.423753 |
| ILMN_1232084 | D2Bwg135  | -0.74687 | -0.17728 | 0.073049 | 0.25033  | 8.284932 | 9.129999 | 0.000735 | 0.010396 | 8.497708 | 7.750835 | 8.320427 |
| ILMN_2587859 | Atp5l     | -1.2898  | -1.2793  | -0.95879 | 0.320512 | 6.795041 | 9.107827 | 0.000744 | 0.010519 | 7.677015 | 6.387216 | 6.39771  |
| ILMN_2518406 | Vil1      | 0.788265 | 0.423286 | 0.721559 | 0.298273 | 12.62728 | 9.098936 | 0.000748 | 0.010564 | 12.144   | 12.93227 | 12.56729 |
| ILMN_1246011 | 4833422F0 | -0.74724 | -0.51921 | -0.76347 | -0.24426 | 6.743121 | 9.097212 | 0.000748 | 0.010566 | 7.250599 | 6.50336  | 6.731393 |
| ILMN_2706857 | 6720456BC | -0.52742 | -0.38631 | -0.38406 | 0.00225  | 11.5462  | 9.086936 | 0.000753 | 0.010619 | 11.87065 | 11.34323 | 11.48434 |
| ILMN_2960108 | Cyp27a1   | 0.576551 | 0.831357 | 1.039469 | 0.208113 | 10.63312 | 9.083226 | 0.000754 | 0.010633 | 10.02128 | 10.59783 | 10.85264 |
| ILMN_2654952 | Hmgcs1    | -0.35221 | -0.19636 | 0.389262 | 0.585617 | 11.99984 | 9.079473 | 0.000756 | 0.010647 | 12.03967 | 11.68746 | 11.84331 |
| ILMN_2695599 | 1810042KC | -0.84649 | -0.55572 | -0.93076 | -0.37504 | 8.600136 | 9.073672 | 0.000758 | 0.010672 | 9.18338  | 8.336887 | 8.627657 |
| ILMN_2641360 | Ak2       | 0.799642 | 0.511646 | 0.110947 | -0.4007  | 10.94868 | 9.072449 | 0.000759 | 0.010672 | 10.59312 | 11.39277 | 11.10477 |
| ILMN_2627299 | Akap9     | 0.359083 | 0.704692 | 0.750338 | 0.045646 | 11.36259 | 9.06487  | 0.000762 | 0.010707 | 10.90906 | 11.26814 | 11.61375 |
| ILMN_2649355 | Stk19     | -0.87213 | -0.35497 | -0.44318 | -0.08821 | 7.756483 | 9.064003 | 0.000763 | 0.010707 | 8.174054 | 7.30192  | 7.819085 |
| ILMN_1249888 | Adcy6     | 0.461836 | 0.626442 | 0.767447 | 0.141005 | 8.683687 | 9.056564 | 0.000766 | 0.010743 | 8.219756 | 8.681591 | 8.846198 |
| ILMN_2641876 | Kif13a    | 0.565147 | 0.361609 | 0.747305 | 0.385696 | 6.313238 | 9.053928 | 0.000767 | 0.010751 | 5.894723 | 6.45987  | 6.256332 |
| ILMN_1237404 | Bok       | -0.87252 | -0.16118 | -0.13028 | 0.0309   | 5.916035 | 9.051966 | 0.000768 | 0.010754 | 6.20703  | 5.334514 | 6.045847 |
| ILMN_2706853 | Scamp1    | 0.569159 | 0.636234 | 0.738861 | 0.102627 | 11.04612 | 9.047739 | 0.00077  | 0.010772 | 10.56006 | 11.12922 | 11.19629 |
| ILMN_1252819 | BC006705  | -0.04151 | -0.41053 | -0.75443 | -0.3439  | 6.761293 | 9.045898 | 0.000771 | 0.010774 | 7.062912 | 7.0214   | 6.65238  |
| ILMN_1259294 | 1110001A2 | -0.69251 | -0.72963 | -0.88023 | -0.15059 | 7.915719 | 9.02131  | 0.000781 | 0.010918 | 8.491312 | 7.798801 | 7.761678 |
| ILMN_1214319 | Gemin6    | -0.3413  | -0.45566 | -0.75207 | -0.29641 | 8.02323  | 9.019866 | 0.000782 | 0.010918 | 8.410487 | 8.069186 | 7.954829 |
| ILMN_1215550 | Inpp1     | 0.476231 | 0.442784 | 0.65035  | 0.207565 | 10.07526 | 9.016935 | 0.000783 | 0.010928 | 9.68292  | 10.15915 | 10.1257  |
| ILMN_2734511 | Ndufb3    | -0.48772 | -0.4232  | -0.56873 | -0.14552 | 11.92094 | 9.012554 | 0.000785 | 0.010946 | 12.29086 | 11.80314 | 11.86765 |
| ILMN_2756704 | 9130213BC | 0.994001 | 0.697485 | 1.123149 | 0.425664 | 7.692977 | 9.008172 | 0.000787 | 0.010965 | 6.989318 | 7.983319 | 7.686803 |
| ILMN_1233860 | 1700020BC | -0.36582 | -0.69371 | -0.62071 | 0.073    | 6.601255 | 9.005561 | 0.000789 | 0.010972 | 7.021312 | 6.655496 | 6.327606 |
| ILMN_1259322 | Pdk4      | 2.612085 | 2.650517 | 1.242112 | -1.40841 | 8.845804 | 8.997149 | 0.000792 | 0.011017 | 7.219626 | 9.83171  | 9.870143 |
| ILMN_2623793 | Atbf1     | 0.930331 | 0.588575 | 0.983001 | 0.394426 | 5.600299 | 8.987158 | 0.000797 | 0.011071 | 4.974822 | 5.905153 | 5.563397 |
| ILMN_2780759 | Pknx1     | 0.838186 | 0.646099 | 0.849237 | 0.203138 | 5.993963 | 8.976463 | 0.000802 | 0.011126 | 5.410582 | 6.248768 | 6.056681 |
| ILMN_2999654 | Psmc3ip   | -0.74011 | -0.57237 | -0.88451 | -0.31214 | 6.688035 | 8.9757   | 0.000802 | 0.011126 | 7.237283 | 6.497175 | 6.664911 |
| ILMN_2640453 | 2410080P2 | -0.42963 | -0.55179 | -0.92584 | -0.37405 | 6.183332 | 8.972433 | 0.000804 | 0.011136 | 6.660146 | 6.23052  | 6.108358 |
| ILMN_2771339 | Crat      | 1.070343 | 0.393649 | 0.104401 | -0.28925 | 5.791315 | 8.971421 | 0.000804 | 0.011136 | 5.399217 | 6.46956  | 5.792866 |
| ILMN_2815138 | Myom1     | -0.42068 | -0.00311 | 0.495984 | 0.499097 | 6.151371 | 8.967596 | 0.000806 | 0.011151 | 6.133323 | 5.712643 | 6.13021  |
| ILMN_1238640 | 2310003HC | 0.644721 | 0.340253 | 0.756022 | 0.415769 | 8.086719 | 8.957601 | 0.00081  | 0.011206 | 7.65147  | 8.296191 | 7.991724 |

|              |           |          |          |          |          |          |          |          |          |          |          |          |
|--------------|-----------|----------|----------|----------|----------|----------|----------|----------|----------|----------|----------|----------|
| ILMN_1226985 | Scamp2    | 0.885882 | 0.736429 | 1.054143 | 0.317714 | 11.45442 | 8.953516 | 0.000812 | 0.011224 | 10.78531 | 11.67119 | 11.52174 |
| ILMN_2671601 | Selk      | -0.90128 | -0.51784 | -0.37775 | 0.140089 | 6.135457 | 8.950835 | 0.000814 | 0.011232 | 6.584676 | 5.683395 | 6.066834 |
| ILMN_2780519 | St7l      | -0.73479 | -0.35574 | -0.67979 | -0.32405 | 8.578675 | 8.944805 | 0.000816 | 0.011258 | 9.021254 | 8.286463 | 8.665515 |
| ILMN_2990229 | 3300001GC | -0.99007 | -0.61367 | -0.73041 | -0.11675 | 9.78516  | 8.942239 | 0.000818 | 0.011258 | 10.3687  | 9.378626 | 9.755033 |
| ILMN_2950441 | Supt5h    | 0.523508 | 0.253945 | 0.482968 | 0.229022 | 8.502561 | 8.942219 | 0.000818 | 0.011258 | 8.187456 | 8.710964 | 8.441401 |
| ILMN_1237993 | Nasp      | 0.410028 | -0.35625 | -0.57003 | -0.21379 | 7.820832 | 8.941264 | 0.000818 | 0.011258 | 7.949895 | 8.359923 | 7.593648 |
| ILMN_2618935 | Map17     | -0.96811 | -0.76778 | -1.10164 | -0.33386 | 5.622325 | 8.933197 | 0.000822 | 0.011302 | 6.331709 | 5.363594 | 5.563926 |
| ILMN_2752490 | Rab17     | -1.08264 | -0.35893 | -0.72299 | -0.36407 | 9.072174 | 8.92913  | 0.000824 | 0.011319 | 9.613316 | 8.530673 | 9.254388 |
| ILMN_2953751 | Sec14l1   | 0.852832 | 0.678972 | 0.603275 | -0.0757  | 6.657525 | 8.92766  | 0.000825 | 0.01132  | 6.123755 | 6.976587 | 6.802728 |
| ILMN_2637066 | 1110019N1 | -0.6383  | -0.47275 | -0.70913 | -0.23638 | 9.196228 | 8.923421 | 0.000827 | 0.011338 | 9.65127  | 9.012975 | 9.178524 |
| ILMN_2930764 | B4galt3   | 0.377658 | 0.602857 | 0.551887 | -0.05097 | 9.287857 | 8.920555 | 0.000828 | 0.011348 | 8.904756 | 9.282414 | 9.507613 |
| ILMN_2636443 | Bcl2l2    | 0.521606 | 0.445562 | 0.803279 | 0.357717 | 9.032644 | 8.919164 | 0.000829 | 0.011348 | 8.590033 | 9.111638 | 9.035595 |
| ILMN_2622671 | Acsl1     | 0.875418 | 0.735703 | 0.50005  | -0.23565 | 7.736228 | 8.913955 | 0.000831 | 0.011373 | 7.208436 | 8.083853 | 7.944139 |
| ILMN_2727520 | Cox8b     | -1.65731 | -0.24231 | -0.59038 | -0.34807 | 6.232241 | 8.911289 | 0.000832 | 0.011382 | 6.854743 | 5.197428 | 6.612432 |
| ILMN_2693594 | Abcf1     | 0.619687 | -0.03518 | 0.028413 | 0.063593 | 7.383049 | 8.908767 | 0.000834 | 0.011388 | 7.229818 | 7.849505 | 7.194639 |
| ILMN_3020829 | Npm3      | -0.71863 | -0.38376 | -0.40955 | -0.02579 | 11.57374 | 8.907681 | 0.000834 | 0.011388 | 11.95172 | 11.23309 | 11.56796 |
| ILMN_2798674 | 2810046LO | 0.405893 | 0.362091 | 0.707017 | 0.344927 | 7.725396 | 8.903562 | 0.000836 | 0.011406 | 7.356646 | 7.762539 | 7.718736 |
| ILMN_2752408 | 2310015NC | -0.78253 | -0.83884 | -0.56771 | 0.271135 | 8.102651 | 8.897724 | 0.000839 | 0.011435 | 8.649922 | 7.86739  | 7.811079 |
| ILMN_2605004 | Ndufb9    | -1.05451 | -0.83292 | -0.94513 | -0.11221 | 7.516059 | 8.895776 | 0.00084  | 0.011438 | 8.224198 | 7.169686 | 7.391281 |
| ILMN_2635606 | 5730596K2 | -0.77005 | -0.56854 | -0.85967 | -0.29113 | 7.548764 | 8.894614 | 0.00084  | 0.011438 | 8.098332 | 7.32828  | 7.529788 |
| ILMN_2665387 | Coro1c    | 0.873931 | 0.571394 | 0.885441 | 0.314047 | 10.70426 | 8.893014 | 0.000841 | 0.011439 | 10.12156 | 10.9955  | 10.69296 |
| ILMN_2495644 | Vps29     | -0.93917 | -0.73411 | -0.71893 | 0.015175 | 6.89756  | 8.885614 | 0.000845 | 0.011478 | 7.495614 | 6.55644  | 6.761505 |
| ILMN_2752618 | 6030458HC | 0.567514 | 0.528422 | 0.371485 | -0.15694 | 9.342083 | 8.884407 | 0.000845 | 0.011478 | 8.975228 | 9.542742 | 9.503649 |
| ILMN_2650532 | Tmed3     | -0.5378  | -0.54061 | -0.78583 | -0.24522 | 8.367696 | 8.869367 | 0.000853 | 0.011569 | 8.833756 | 8.295955 | 8.293149 |
| ILMN_2430220 | Tmem2     | 0.538189 | 0.604355 | 1.002209 | 0.397855 | 6.902405 | 8.861036 | 0.000857 | 0.011597 | 6.366217 | 6.904406 | 6.970572 |
| ILMN_2613683 | Ace       | 1.347163 | 1.633539 | 1.115494 | -0.51804 | 8.313795 | 8.860981 | 0.000857 | 0.011597 | 7.289746 | 8.636909 | 8.923284 |
| ILMN_2653842 | C030004A1 | -1.07849 | -0.64915 | -0.9232  | -0.27406 | 6.390305 | 8.86057  | 0.000857 | 0.011597 | 7.053015 | 5.974525 | 6.403868 |
| ILMN_2821788 | Cenpi     | -0.89828 | -0.78841 | -0.85099 | -0.06258 | 5.322063 | 8.859881 | 0.000857 | 0.011597 | 5.956481 | 5.058206 | 5.168072 |
| ILMN_1239494 | Mbtps1    | 0.580496 | 0.4909   | 0.543328 | 0.052427 | 7.687107 | 8.857632 | 0.000858 | 0.011603 | 7.283426 | 7.863922 | 7.774326 |
| ILMN_1227225 | Trim28    | 0.788691 | 0.344406 | 0.531038 | 0.186632 | 9.847765 | 8.845521 | 0.000864 | 0.011673 | 9.431731 | 10.22042 | 9.776137 |
| ILMN_2728034 | Caml      | -0.10862 | -0.36579 | -0.52965 | -0.16386 | 7.951557 | 8.8438   | 0.000865 | 0.011673 | 8.20257  | 8.09395  | 7.836784 |
| ILMN_2498416 | Zfp207    | -0.08397 | -0.37636 | -0.58559 | -0.20924 | 8.60979  | 8.843138 | 0.000866 | 0.011673 | 8.87127  | 8.787297 | 8.494915 |
| ILMN_1225535 | Ganab     | 0.904963 | 0.570739 | 0.466294 | -0.10445 | 7.533909 | 8.841556 | 0.000866 | 0.011675 | 7.04841  | 7.953373 | 7.619149 |
| ILMN_2610703 | Hrsp12    | -0.33534 | -0.42114 | -0.75307 | -0.33193 | 7.804162 | 8.833277 | 0.000871 | 0.011712 | 8.181549 | 7.846205 | 7.76041  |
| ILMN_2647873 | Nav1      | 0.783496 | 0.833729 | 1.212892 | 0.379163 | 6.925665 | 8.832271 | 0.000871 | 0.011712 | 6.218136 | 7.001632 | 7.051865 |

|              |           |          |          |          |          |          |          |          |          |          |          |          |
|--------------|-----------|----------|----------|----------|----------|----------|----------|----------|----------|----------|----------|----------|
| ILMN_1251056 | Lsm6      | -0.43499 | -0.42586 | -0.56629 | -0.14043 | 6.448452 | 8.831116 | 0.000872 | 0.011712 | 6.805238 | 6.370247 | 6.379376 |
| ILMN_3001481 | Chrn1     | -0.74175 | -0.42074 | -0.28508 | 0.135661 | 7.595855 | 8.830672 | 0.000872 | 0.011712 | 7.95775  | 7.215997 | 7.537007 |
| ILMN_1244776 | Snrpd3    | -0.43681 | -0.49317 | -0.67489 | -0.18172 | 11.14178 | 8.826083 | 0.000874 | 0.011734 | 11.543   | 11.10618 | 11.04982 |
| ILMN_1225332 | Tmsb10    | -0.95151 | -0.57022 | -0.8797  | -0.30949 | 6.274904 | 8.823865 | 0.000875 | 0.01174  | 6.87526  | 5.923752 | 6.305045 |
| ILMN_2672798 | Psm5      | 0.480753 | -0.20228 | -0.40422 | -0.20194 | 6.323523 | 8.821633 | 0.000877 | 0.011746 | 6.354959 | 6.835712 | 6.15268  |
| ILMN_2708599 | Psm3      | -0.46235 | -0.32842 | -0.52549 | -0.19708 | 12.17205 | 8.819781 | 0.000877 | 0.01175  | 12.50112 | 12.03877 | 12.1727  |
| ILMN_2836147 | Psm7      | -0.73519 | -0.57426 | -0.62872 | -0.05446 | 9.365871 | 8.816559 | 0.000879 | 0.011763 | 9.850414 | 9.115225 | 9.276152 |
| ILMN_1228334 | 2410015N1 | -0.86367 | -0.44257 | -0.56483 | -0.12226 | 9.448005 | 8.80977  | 0.000883 | 0.011798 | 9.915774 | 9.052102 | 9.473203 |
| ILMN_2795395 | Hmgb2l1   | -0.3802  | -0.86093 | -0.25823 | 0.6027   | 5.302849 | 8.808721 | 0.000883 | 0.011798 | 5.677688 | 5.297487 | 4.816761 |
| ILMN_2624448 | Ppa2      | -0.16183 | -0.43111 | -0.64463 | -0.21352 | 8.287715 | 8.806503 | 0.000884 | 0.011799 | 8.597105 | 8.435279 | 8.165997 |
| ILMN_1213014 | Umps      | 0.421712 | -0.29548 | -0.36946 | -0.07398 | 6.276716 | 8.805894 | 0.000885 | 0.011799 | 6.337524 | 6.759236 | 6.042042 |
| ILMN_2709167 | Papln     | 0.516053 | 1.051323 | 0.443435 | -0.60789 | 6.004849 | 8.804457 | 0.000885 | 0.0118   | 5.502146 | 6.018199 | 6.553469 |
| ILMN_2726714 | DOH8S2298 | -0.40372 | -0.25265 | -0.69853 | -0.44587 | 7.104703 | 8.799081 | 0.000888 | 0.011813 | 7.443429 | 7.039707 | 7.190775 |
| ILMN_1249698 | Wbp2      | 0.672997 | 0.391267 | 0.612509 | 0.221242 | 12.91562 | 8.798995 | 0.000888 | 0.011813 | 12.49643 | 13.16943 | 12.8877  |
| ILMN_2610105 | Snrpd1    | -0.55458 | -0.35191 | -0.72695 | -0.37504 | 11.06001 | 8.798301 | 0.000888 | 0.011813 | 11.46837 | 10.91379 | 11.11647 |
| ILMN_2729985 | Cops4     | -0.19817 | -0.84577 | -0.82774 | 0.018035 | 7.215279 | 8.797263 | 0.000889 | 0.011813 | 7.683198 | 7.485027 | 6.837427 |
| ILMN_2870883 | Yrdc      | -0.63925 | -0.44987 | -0.93413 | -0.48427 | 7.730558 | 8.793444 | 0.000891 | 0.01183  | 8.23637  | 7.597122 | 7.786504 |
| ILMN_3102333 | Dars      | 0.134493 | -0.34629 | -0.39752 | -0.05124 | 9.614247 | 8.787081 | 0.000894 | 0.011865 | 9.766576 | 9.901069 | 9.420291 |
| ILMN_2619877 | Ap1m2     | -0.50774 | -0.7385  | -0.74195 | -0.00345 | 9.060752 | 8.77823  | 0.000899 | 0.011917 | 9.557799 | 9.050063 | 8.819299 |
| ILMN_2620053 | Als2      | 1.030012 | 0.487784 | 0.455923 | -0.03186 | 6.496556 | 8.776767 | 0.0009   | 0.011918 | 6.003127 | 7.033138 | 6.490911 |
| ILMN_2869312 | Fbxo4     | -0.5982  | -0.39248 | -0.51247 | -0.12    | 9.817939 | 8.771282 | 0.000902 | 0.011947 | 10.19373 | 9.595523 | 9.801252 |
| ILMN_2657828 | Rhbdf1    | 0.740662 | 0.660784 | 0.921515 | 0.260731 | 7.985917 | 8.762131 | 0.000907 | 0.012001 | 7.405177 | 8.145839 | 8.065961 |
| ILMN_1247626 | As3mt     | 0.724493 | 0.11288  | 0.136688 | 0.023809 | 7.9595   | 8.757608 | 0.00091  | 0.012024 | 7.715985 | 8.440478 | 7.828864 |
| ILMN_1251572 | Xpo7      | 0.640929 | 0.112586 | -0.16681 | -0.2794  | 5.31196  | 8.752663 | 0.000912 | 0.012049 | 5.165285 | 5.806213 | 5.277871 |
| ILMN_2691192 | Rbbp7     | 0.780636 | -0.05768 | -0.26351 | -0.20583 | 9.000481 | 8.750524 | 0.000913 | 0.012055 | 8.885621 | 9.666257 | 8.827937 |
| ILMN_2954265 | Rassf1    | -0.72951 | -0.31535 | -0.38081 | -0.06546 | 8.761912 | 8.745363 | 0.000916 | 0.012082 | 9.118329 | 8.388824 | 8.802977 |
| ILMN_2777019 | Spo11     | -0.76428 | -0.63073 | -0.50946 | 0.121268 | 4.784521 | 8.729393 | 0.000925 | 0.012177 | 5.260638 | 4.496354 | 4.629912 |
| ILMN_1254943 | BC024955  | 0.617087 | 0.479872 | 0.769269 | 0.289397 | 6.669788 | 8.729311 | 0.000925 | 0.012177 | 6.203231 | 6.820318 | 6.683103 |
| ILMN_2695964 | Lep       | -0.56586 | 1.63915  | 0.456294 | -1.18286 | 6.563519 | 8.72363  | 0.000928 | 0.012208 | 6.181123 | 5.61526  | 7.820273 |
| ILMN_2894999 | Slc35c2   | 1.073548 | 1.001473 | 0.845236 | -0.15624 | 8.593389 | 8.717522 | 0.000931 | 0.012242 | 7.863325 | 8.936873 | 8.864798 |
| ILMN_2698353 | D19Ertd70 | 0.337829 | 0.408831 | 0.650546 | 0.241716 | 9.405535 | 8.708438 | 0.000936 | 0.012278 | 9.056233 | 9.394063 | 9.465064 |
| ILMN_1245789 | Ccne2     | -0.95073 | -0.7595  | -0.86921 | -0.10971 | 6.117181 | 8.706898 | 0.000937 | 0.012278 | 6.762039 | 5.811312 | 6.00254  |
| ILMN_2872371 | Ppp1r14d  | -0.91329 | -0.41793 | -0.3508  | 0.067131 | 12.08244 | 8.706249 | 0.000937 | 0.012278 | 12.50294 | 11.58965 | 12.08501 |
| ILMN_2819859 | Tbc1d2b   | 0.437386 | 0.703668 | 0.662938 | -0.04073 | 6.964414 | 8.706143 | 0.000937 | 0.012278 | 6.513416 | 6.950802 | 7.217084 |
| ILMN_2693258 | 2310005N0 | -0.56619 | -0.40914 | -0.77661 | -0.36747 | 8.713289 | 8.706026 | 0.000937 | 0.012278 | 9.151272 | 8.585084 | 8.742135 |

|              |           |          |          |          |          |          |          |          |          |          |          |          |
|--------------|-----------|----------|----------|----------|----------|----------|----------|----------|----------|----------|----------|----------|
| ILMN_2654068 | Crsp3     | -0.10661 | 0.313457 | 0.565659 | 0.252203 | 8.476793 | 8.7027   | 0.000939 | 0.012293 | 8.283667 | 8.177056 | 8.597124 |
| ILMN_3112922 | Hdac5     | 0.200961 | 0.56222  | 0.652149 | 0.089929 | 8.439061 | 8.699997 | 0.000941 | 0.012303 | 8.085228 | 8.286189 | 8.647448 |
| ILMN_2772380 | 26100120  | -0.51438 | -0.54173 | -0.83373 | -0.292   | 8.366874 | 8.698204 | 0.000942 | 0.012307 | 8.839333 | 8.32495  | 8.297607 |
| ILMN_3154810 | Smarca2   | 0.685857 | 0.671774 | 1.114769 | 0.442995 | 9.294096 | 8.692305 | 0.000945 | 0.01234  | 8.675996 | 9.361853 | 9.34777  |
| ILMN_2883392 | S100a11   | -0.94201 | -0.56183 | -0.14059 | 0.421239 | 12.09155 | 8.689354 | 0.000947 | 0.012349 | 12.50266 | 11.56065 | 11.94083 |
| ILMN_2837025 | Gak       | 0.580172 | 0.395371 | 0.615127 | 0.219756 | 11.91185 | 8.688525 | 0.000947 | 0.012349 | 11.51418 | 12.09435 | 11.90955 |
| ILMN_2793488 | Psmc7     | -0.59337 | -0.40006 | -0.6622  | -0.26215 | 11.56751 | 8.686011 | 0.000948 | 0.012357 | 11.98142 | 11.38804 | 11.58136 |
| ILMN_1217913 | D230007K  | 0.597408 | 0.829336 | 0.776978 | -0.05236 | 5.277442 | 8.680697 | 0.000951 | 0.012387 | 4.726512 | 5.32392  | 5.555847 |
| ILMN_2664950 | Phf2      | 0.453127 | 0.44733  | 0.760092 | 0.312762 | 6.649938 | 8.67717  | 0.000953 | 0.012403 | 6.234801 | 6.687928 | 6.682131 |
| ILMN_2625035 | 20100050  | -0.84208 | -0.63905 | -0.80343 | -0.16438 | 8.135068 | 8.671138 | 0.000957 | 0.012432 | 8.706207 | 7.864126 | 8.067157 |
| ILMN_3044633 | Sri       | -0.50317 | -0.54497 | -0.80494 | -0.25997 | 8.729101 | 8.670536 | 0.000957 | 0.012432 | 9.192374 | 8.689201 | 8.647401 |
| ILMN_1239181 | 1110025F2 | -0.56972 | -0.53846 | -0.6749  | -0.13644 | 7.299923 | 8.662492 | 0.000962 | 0.012482 | 7.745694 | 7.175971 | 7.207234 |
| ILMN_2691298 | Mrpl27    | -0.56348 | -0.44669 | -0.51439 | -0.0677  | 10.5164  | 8.653504 | 0.000967 | 0.012538 | 10.89754 | 10.33406 | 10.45085 |
| ILMN_2721337 | G6pdx     | 0.811083 | 0.230882 | 0.148103 | -0.08278 | 8.021465 | 8.651217 | 0.000968 | 0.012546 | 7.723948 | 8.535031 | 7.95483  |
| ILMN_2821850 | Pbef1     | -0.80375 | -0.93182 | -0.6228  | 0.309015 | 5.711574 | 8.647276 | 0.00097  | 0.012565 | 6.301168 | 5.497417 | 5.369348 |
| ILMN_2864497 | Ncdn      | 1.037319 | 0.748613 | 0.726836 | -0.02178 | 5.969554 | 8.645438 | 0.000971 | 0.012569 | 5.341362 | 6.378681 | 6.089975 |
| ILMN_3155190 | Stk35     | 0.362992 | 0.681997 | 0.578508 | -0.10349 | 4.839551 | 8.632945 | 0.000978 | 0.012652 | 4.433677 | 4.796669 | 5.115674 |
| ILMN_1247930 | Nqo2      | -0.52174 | -0.63376 | -0.86747 | -0.23371 | 8.670605 | 8.630923 | 0.000979 | 0.012652 | 9.176345 | 8.654609 | 8.542589 |
| ILMN_3072676 | Ankrd12   | 0.602997 | 0.55918  | 0.717891 | 0.158711 | 6.718974 | 8.630432 | 0.00098  | 0.012652 | 6.248957 | 6.851955 | 6.808137 |
| ILMN_2736153 | Map3k11   | 0.477069 | 0.416752 | 0.638347 | 0.221595 | 9.478467 | 8.627966 | 0.000981 | 0.012661 | 9.095425 | 9.572494 | 9.512177 |
| ILMN_3127381 | Zfp239    | 0.683345 | 0.345919 | 0.455823 | 0.109904 | 7.169427 | 8.62671  | 0.000982 | 0.012661 | 6.798155 | 7.4815   | 7.144074 |
| ILMN_2588056 | Gapd      | 0.645146 | 0.467803 | 0.42609  | -0.04171 | 13.71217 | 8.619579 | 0.000986 | 0.012694 | 13.32741 | 13.97255 | 13.79521 |
| ILMN_3093150 | Npm3      | -0.77308 | -0.68934 | -0.71353 | -0.0242  | 6.376244 | 8.619034 | 0.000986 | 0.012694 | 6.92023  | 6.147153 | 6.230895 |
| ILMN_2769133 | Rbm4      | -0.32556 | -0.4485  | -0.62762 | -0.17911 | 8.083512 | 8.618484 | 0.000987 | 0.012694 | 8.43393  | 8.108374 | 7.985427 |
| ILMN_1225658 | Ubl3      | -0.68701 | -0.27583 | -0.25309 | 0.022739 | 11.01859 | 8.616814 | 0.000988 | 0.012697 | 11.32257 | 10.63556 | 11.04674 |
| ILMN_2617858 | Ovol1     | 0.805953 | 0.65974  | 0.614655 | -0.04509 | 8.250514 | 8.613583 | 0.000989 | 0.012712 | 7.730427 | 8.536381 | 8.390167 |
| ILMN_1226978 | Pex5      | 0.71707  | 0.639259 | 0.351785 | -0.28747 | 7.519893 | 8.604332 | 0.000995 | 0.012766 | 7.092865 | 7.809935 | 7.732124 |
| ILMN_1224247 | Svil      | 0.545254 | 0.606912 | 1.034776 | 0.427863 | 5.768795 | 8.603806 | 0.000995 | 0.012766 | 5.22206  | 5.767314 | 5.828972 |
| ILMN_2957862 | Al326906  | 0.593009 | -0.16518 | 0.031659 | 0.196842 | 7.336458 | 8.602254 | 0.000996 | 0.012768 | 7.221587 | 7.814596 | 7.056404 |
| ILMN_1214880 | Dmn       | 0.233954 | 0.945324 | 1.668273 | 0.722949 | 8.604565 | 8.599414 | 0.000998 | 0.01278  | 7.892678 | 8.126632 | 8.838001 |
| ILMN_2826264 | Serinc2   | 0.520285 | 0.539563 | 0.515248 | -0.02431 | 9.517617 | 8.59216  | 0.001002 | 0.012821 | 9.123843 | 9.644128 | 9.663405 |
| ILMN_2638520 | Rab11fip3 | 0.645131 | 0.55123  | 0.680181 | 0.128951 | 8.823699 | 8.59142  | 0.001002 | 0.012821 | 8.354564 | 8.999694 | 8.905793 |
| ILMN_2819951 | Lrp12     | 0.10314  | 0.580853 | 0.697    | 0.116146 | 9.888405 | 8.587008 | 0.001005 | 0.01284  | 9.543157 | 9.646297 | 10.12401 |
| ILMN_1222246 | Adfp      | 1.027548 | 0.831933 | 0.1443   | -0.68763 | 8.196098 | 8.586412 | 0.001005 | 0.01284  | 7.695153 | 8.722701 | 8.527086 |
| ILMN_2604688 | Ap2a1     | 0.794741 | 0.444099 | 0.621479 | 0.17738  | 6.445151 | 8.578149 | 0.00101  | 0.012871 | 5.980071 | 6.774813 | 6.42417  |

|              |            |          |          |          |          |          |          |          |          |          |          |          |
|--------------|------------|----------|----------|----------|----------|----------|----------|----------|----------|----------|----------|----------|
| ILMN_2617305 | Nudt8      | -0.74701 | -0.60498 | -0.87126 | -0.26627 | 8.614665 | 8.576429 | 0.001011 | 0.012871 | 9.170477 | 8.423469 | 8.565493 |
| ILMN_2791326 | Sdf2       | -0.80153 | -0.36812 | -0.51795 | -0.14983 | 10.20342 | 8.575931 | 0.001012 | 0.012871 | 10.62532 | 9.823792 | 10.2572  |
| ILMN_2594971 | Rpl38      | -0.61754 | -0.39838 | -0.85294 | -0.45456 | 9.060117 | 8.575104 | 0.001012 | 0.012871 | 9.527332 | 8.90979  | 9.128955 |
| ILMN_2788263 | Ncbp2      | -0.72633 | -0.76631 | -0.51516 | 0.251142 | 5.199549 | 8.574204 | 0.001013 | 0.012871 | 5.7015   | 4.975166 | 4.935194 |
| ILMN_2962840 | Cct6a      | 0.00518  | -0.39924 | -0.46527 | -0.06604 | 10.8827  | 8.573852 | 0.001013 | 0.012871 | 11.09753 | 11.10271 | 10.69829 |
| ILMN_2612350 | Stx18      | -0.31429 | -0.50529 | -0.68712 | -0.18183 | 7.640892 | 8.573653 | 0.001013 | 0.012871 | 8.017564 | 7.703279 | 7.512277 |
| ILMN_3161390 | Slc28a1    | 1.126969 | 0.931007 | 0.519297 | -0.41171 | 9.426444 | 8.564324 | 0.001018 | 0.012932 | 8.782125 | 9.909095 | 9.713133 |
| ILMN_3077758 | Unc93a     | 0.535628 | 1.044281 | 0.089336 | -0.95495 | 8.236199 | 8.560981 | 0.001021 | 0.012948 | 7.818887 | 8.354516 | 8.863168 |
| ILMN_2790144 | Tom34      | 0.681889 | 0.465606 | 0.597301 | 0.131695 | 7.538479 | 8.557649 | 0.001023 | 0.012964 | 7.102279 | 7.784169 | 7.567886 |
| ILMN_2909105 | Z310047D1  | -0.56497 | -0.44264 | -0.62776 | -0.18511 | 7.069247 | 8.548366 | 0.001028 | 0.013026 | 7.478089 | 6.913122 | 7.035445 |
| ILMN_2876579 | Ubx1       | -0.7068  | -0.29535 | -0.46088 | -0.16553 | 9.390472 | 8.546227 | 0.001029 | 0.013033 | 9.756229 | 9.049434 | 9.460876 |
| ILMN_2717569 | Z1810047C2 | 0.210742 | -0.16946 | -0.43966 | -0.2702  | 9.096127 | 8.541855 | 0.001032 | 0.013047 | 9.195719 | 9.406461 | 9.026264 |
| ILMN_2906718 | Fcf1       | -0.58251 | -0.56239 | -0.71117 | -0.14877 | 8.172384 | 8.540857 | 0.001033 | 0.013047 | 8.636402 | 8.053887 | 8.074011 |
| ILMN_1251890 | Snrp1c     | -0.67411 | -0.5233  | -0.77256 | -0.24926 | 7.574258 | 8.540333 | 0.001033 | 0.013047 | 8.066748 | 7.392639 | 7.543453 |
| ILMN_2709864 | BC018472   | -0.63564 | -0.45543 | -0.35167 | 0.103757 | 6.935823 | 8.539396 | 0.001034 | 0.013047 | 7.296506 | 6.66087  | 6.841079 |
| ILMN_2946817 | BC002163   | -0.82737 | -0.59721 | -0.76228 | -0.16507 | 11.26391 | 8.537795 | 0.001035 | 0.01305  | 11.81062 | 10.98325 | 11.21341 |
| ILMN_2930680 | Lrfr3      | 0.608782 | 0.393135 | 0.684891 | 0.291756 | 7.560624 | 8.533389 | 0.001037 | 0.013069 | 7.138922 | 7.747704 | 7.532057 |
| ILMN_3026137 | D2Bwg089   | -0.86559 | -0.7157  | -0.73989 | -0.02419 | 5.525968 | 8.532914 | 0.001038 | 0.013069 | 6.106261 | 5.240674 | 5.390564 |
| ILMN_2833614 | Zfp817     | -0.69937 | -0.5942  | -0.52675 | 0.067451 | 5.357983 | 8.528469 | 0.00104  | 0.013085 | 5.813062 | 5.113695 | 5.218863 |
| ILMN_1247220 | Tbx3       | 0.792526 | 0.604118 | 0.947313 | 0.343195 | 9.337105 | 8.528336 | 0.00104  | 0.013085 | 8.751116 | 9.543642 | 9.355234 |
| ILMN_2718356 | Z9030221M  | 0.515725 | -0.08699 | -0.30547 | -0.21848 | 5.751564 | 8.524351 | 0.001043 | 0.013098 | 5.72075  | 6.236474 | 5.633756 |
| ILMN_1258633 | Eif3s2     | -0.47251 | -0.40107 | -0.66931 | -0.26824 | 11.16685 | 8.52424  | 0.001043 | 0.013098 | 11.55257 | 11.08006 | 11.1515  |
| ILMN_2642985 | Dhrs8      | 0.728677 | 1.165952 | 0.586065 | -0.57989 | 9.984057 | 8.521488 | 0.001045 | 0.01311  | 9.363883 | 10.09256 | 10.52984 |
| ILMN_2998548 | Pycr2      | -0.92387 | -0.57443 | -0.4941  | 0.080338 | 8.385009 | 8.51774  | 0.001047 | 0.013129 | 8.88311  | 7.959237 | 8.308676 |
| ILMN_2971721 | Z2410025L1 | 0.614957 | 0.657376 | 0.857969 | 0.200593 | 8.106685 | 8.514843 | 0.001049 | 0.013142 | 7.57411  | 8.189067 | 8.231486 |
| ILMN_2739340 | Lym2       | -0.66155 | -0.3672  | -0.32021 | 0.046993 | 7.520213 | 8.512636 | 0.00105  | 0.013143 | 7.857452 | 7.195902 | 7.490252 |
| ILMN_1255146 | BC003479   | -0.544   | -0.18009 | -0.34536 | -0.16527 | 10.79072 | 8.512258 | 0.00105  | 0.013143 | 11.05808 | 10.51408 | 10.87799 |
| ILMN_2788629 | Cnih4      | -1.15958 | -0.89593 | -0.77159 | 0.12434  | 11.4003  | 8.509251 | 0.001052 | 0.013157 | 12.10708 | 10.9475  | 11.21115 |
| ILMN_2951691 | Hist1h3e   | -0.66174 | -0.36528 | -0.55588 | -0.1906  | 7.750973 | 8.506605 | 0.001054 | 0.013163 | 8.146698 | 7.484954 | 7.78142  |
| ILMN_3115917 | Hsd11b1    | -1.33286 | -0.6446  | -0.55379 | 0.090808 | 8.14503  | 8.506066 | 0.001054 | 0.013163 | 8.777843 | 7.444982 | 8.133244 |
| ILMN_1219447 | Zfp261     | 0.28144  | 0.392685 | 0.789823 | 0.397138 | 7.043017 | 8.503504 | 0.001056 | 0.013174 | 6.67703  | 6.958469 | 7.069715 |
| ILMN_1256052 | Khdrbs1    | 0.591321 | 0.155843 | 0.046166 | -0.10968 | 7.267564 | 8.502269 | 0.001056 | 0.013174 | 7.069231 | 7.660553 | 7.225074 |
| ILMN_1227889 | Pias3      | -0.48486 | 0.158635 | 0.085281 | -0.07335 | 7.147077 | 8.489274 | 0.001065 | 0.013266 | 7.207314 | 6.72245  | 7.365949 |
| ILMN_2780915 | BC006705   | -0.20809 | -0.46816 | -0.54299 | -0.07483 | 6.568077 | 8.486789 | 0.001066 | 0.013276 | 6.872885 | 6.664798 | 6.404728 |
| ILMN_3119954 | Mysm1      | 0.346269 | 0.542079 | 1.049293 | 0.507214 | 6.781245 | 8.480906 | 0.00107  | 0.013301 | 6.296835 | 6.643103 | 6.838913 |



|              |           |          |          |          |          |          |          |          |          |          |          |          |
|--------------|-----------|----------|----------|----------|----------|----------|----------|----------|----------|----------|----------|----------|
| ILMN_2601507 | Bpnt1     | 0.456373 | -0.05837 | -0.24382 | -0.18545 | 10.22603 | 8.478705 | 0.001071 | 0.013301 | 10.18749 | 10.64386 | 10.12912 |
| ILMN_2863264 | Ctdsp2    | 0.784676 | 0.831691 | 1.119465 | 0.287775 | 10.74143 | 8.47836  | 0.001071 | 0.013301 | 10.05747 | 10.84215 | 10.88916 |
| ILMN_2912111 | D10627    | -1.04782 | -0.78255 | -0.63583 | 0.146723 | 6.779016 | 8.4756   | 0.001073 | 0.013301 | 7.395567 | 6.347742 | 6.613017 |
| ILMN_3162771 | Josd3     | -0.70217 | -0.40277 | -0.41026 | -0.0075  | 7.38651  | 8.474504 | 0.001074 | 0.013301 | 7.765311 | 7.063138 | 7.362544 |
| ILMN_2817883 | Als2      | 0.808607 | 0.453349 | 0.423327 | -0.03002 | 8.960907 | 8.474215 | 0.001074 | 0.013301 | 8.539587 | 9.348194 | 8.992936 |
| ILMN_2961091 | Slc29a3   | 0.832245 | 0.62337  | 0.711639 | 0.088269 | 6.07611  | 8.471544 | 0.001076 | 0.013301 | 5.534296 | 6.366541 | 6.157666 |
| ILMN_2752327 | Pank3     | 1.428081 | 0.699077 | 0.198379 | -0.5007  | 7.051579 | 8.470874 | 0.001076 | 0.013301 | 6.470195 | 7.898276 | 7.169271 |
| ILMN_2603182 | Tfam      | -0.59104 | -0.67184 | -0.86356 | -0.19172 | 8.462834 | 8.470842 | 0.001076 | 0.013301 | 8.994441 | 8.403406 | 8.322605 |
| ILMN_1260252 | Trim41    | 0.611334 | 0.454837 | 0.544779 | 0.089942 | 7.786739 | 8.469681 | 0.001077 | 0.013301 | 7.384002 | 7.995335 | 7.838839 |
| ILMN_2510714 | Zhx1      | -0.69563 | -0.34187 | -0.03154 | 0.310329 | 6.965388 | 8.469231 | 0.001077 | 0.013301 | 7.232647 | 6.537012 | 6.890781 |
| ILMN_2643933 | Btbd9     | 0.733436 | 0.335174 | 0.698155 | 0.362981 | 6.182609 | 8.469034 | 0.001077 | 0.013301 | 5.740918 | 6.474354 | 6.076092 |
| ILMN_2743723 | Ptpn11    | 0.711963 | 0.622553 | 0.818331 | 0.195777 | 6.636362 | 8.467904 | 0.001078 | 0.013301 | 6.09815  | 6.810113 | 6.720704 |
| ILMN_2705946 | Sema6a    | 0.713132 | 0.908146 | 0.731606 | -0.17654 | 5.120503 | 8.462479 | 0.001082 | 0.013335 | 4.532281 | 5.245414 | 5.440427 |
| ILMN_2594855 | Pdpk1     | 0.784888 | 0.587972 | 1.080601 | 0.492629 | 6.816441 | 8.461196 | 0.001082 | 0.013336 | 6.203075 | 6.987963 | 6.791048 |
| ILMN_1257872 | 4933434E2 | -0.52044 | -0.38677 | -0.52413 | -0.13736 | 9.093182 | 8.458856 | 0.001084 | 0.013345 | 9.451015 | 8.930577 | 9.064249 |
| ILMN_2458587 | Zfp592    | 0.624288 | 0.61348  | 0.653662 | 0.040181 | 6.738893 | 8.456931 | 0.001085 | 0.01335  | 6.266035 | 6.890323 | 6.879516 |
| ILMN_2696711 | Mmp11     | 0.088945 | 0.43982  | 0.496529 | 0.056709 | 4.790599 | 8.453637 | 0.001087 | 0.013367 | 4.534275 | 4.62322  | 4.974095 |
| ILMN_2918479 | Hspa8     | 0.799712 | 0.011357 | -0.18455 | -0.1959  | 12.28967 | 8.449877 | 0.00109  | 0.013387 | 12.13304 | 12.93275 | 12.14439 |
| ILMN_2974720 | Igf2bp2   | 0.67358  | -0.06815 | 0.401935 | 0.47009  | 8.354358 | 8.44765  | 0.001091 | 0.013396 | 8.102518 | 8.776098 | 8.034364 |
| ILMN_1243652 | Tagln     | -1.33824 | -0.19406 | -0.07459 | 0.119473 | 8.04944  | 8.44549  | 0.001093 | 0.013403 | 8.451163 | 7.112924 | 8.257099 |
| ILMN_2758087 | Ccnt1     | 0.541373 | 0.345766 | 0.588463 | 0.242697 | 7.030064 | 8.441743 | 0.001095 | 0.013417 | 6.661164 | 7.202536 | 7.00693  |
| ILMN_2734060 | 1110007M  | -0.36683 | -0.96499 | -0.87154 | 0.093454 | 9.232927 | 8.441397 | 0.001095 | 0.013417 | 9.783768 | 9.416936 | 8.818775 |
| ILMN_2613923 | Popdc2    | -0.53891 | 0.316466 | 0.565813 | 0.249346 | 6.015594 | 8.435801 | 0.001099 | 0.013452 | 5.929752 | 5.390844 | 6.246218 |
| ILMN_2848588 | LOC654842 | -0.73117 | -0.34607 | -0.58843 | -0.24235 | 9.958833 | 8.434472 | 0.0011   | 0.013453 | 10.37525 | 9.644079 | 10.02918 |
| ILMN_3162499 | 3110005G2 | -0.6913  | -0.50516 | -0.7174  | -0.21224 | 9.163625 | 8.428146 | 0.001104 | 0.013494 | 9.642092 | 8.95079  | 9.13693  |
| ILMN_2591217 | Rars      | 0.607646 | -0.05941 | -0.18127 | -0.12186 | 9.480115 | 8.420475 | 0.001109 | 0.013547 | 9.388372 | 9.996018 | 9.328965 |
| ILMN_2617265 | Ipo13     | 0.536283 | 0.481017 | 0.751432 | 0.270415 | 8.752972 | 8.414492 | 0.001113 | 0.013585 | 8.310789 | 8.847072 | 8.791806 |
| ILMN_2720925 | 0610012D1 | -0.82605 | -0.61462 | -0.40676 | 0.207864 | 7.717211 | 8.40264  | 0.001121 | 0.013672 | 8.179069 | 7.35302  | 7.564445 |
| ILMN_1257788 | A430005L1 | -0.39337 | -0.35121 | -0.78449 | -0.43328 | 7.479924 | 8.401301 | 0.001122 | 0.013673 | 7.862192 | 7.468817 | 7.510986 |
| ILMN_2716389 | Smpd3     | 0.677135 | 0.630616 | 0.940808 | 0.310192 | 8.407349 | 8.399879 | 0.001123 | 0.013675 | 7.845209 | 8.522344 | 8.475825 |
| ILMN_3066222 | Rnasen    | 0.669805 | 0.317398 | 0.660064 | 0.342666 | 7.969432 | 8.397161 | 0.001124 | 0.013678 | 7.557615 | 8.22742  | 7.875013 |
| ILMN_2988384 | Fbxl4     | -0.85994 | -0.90873 | -0.70248 | 0.206246 | 6.747848 | 8.397121 | 0.001124 | 0.013678 | 7.365635 | 6.505692 | 6.45691  |
| ILMN_2865882 | 3830402IO | -1.10417 | -0.82539 | -0.89604 | -0.07065 | 6.429135 | 8.38525  | 0.001132 | 0.013766 | 7.135533 | 6.031361 | 6.310147 |
| ILMN_2615170 | Acad8     | 0.151325 | -0.26726 | -0.6792  | -0.41194 | 7.265887 | 8.377069 | 0.001138 | 0.013823 | 7.464673 | 7.615998 | 7.197408 |
| ILMN_2832620 | Rfx1      | 0.823367 | 0.668416 | 1.05684  | 0.388425 | 8.369562 | 8.37096  | 0.001142 | 0.01385  | 7.732406 | 8.555773 | 8.400822 |

|              |           |          |          |          |          |          |          |          |          |          |          |          |
|--------------|-----------|----------|----------|----------|----------|----------|----------|----------|----------|----------|----------|----------|
| ILMN_2877069 | Tspo      | -0.40669 | -0.40842 | -0.63525 | -0.22683 | 10.50592 | 8.370678 | 0.001142 | 0.01385  | 10.86851 | 10.46182 | 10.46009 |
| ILMN_2743650 | 2900045N  | 0.602377 | 0.826357 | 0.662047 | -0.16431 | 6.851969 | 8.370365 | 0.001142 | 0.01385  | 6.329273 | 6.931651 | 7.15563  |
| ILMN_1256643 | Bing4     | 0.452222 | -0.1059  | -0.22789 | -0.122   | 7.002044 | 8.368107 | 0.001144 | 0.013859 | 6.972437 | 7.424658 | 6.866539 |
| ILMN_2652260 | AW060207  | -0.49929 | -0.46772 | -0.55566 | -0.08794 | 6.63576  | 8.359593 | 0.00115  | 0.013915 | 7.016426 | 6.517138 | 6.548706 |
| ILMN_2712557 | H47       | -0.44559 | -0.46712 | -0.53731 | -0.07019 | 11.42443 | 8.35833  | 0.001151 | 0.013915 | 11.78694 | 11.34135 | 11.31982 |
| ILMN_2833376 | Prkaca    | 0.532449 | 0.247181 | 0.40829  | 0.161109 | 9.777137 | 8.357821 | 0.001151 | 0.013915 | 9.480157 | 10.01261 | 9.727338 |
| ILMN_2890399 | 1700071KC | -0.5564  | -0.71206 | -0.78527 | -0.07321 | 5.206292 | 8.354732 | 0.001153 | 0.013926 | 5.719726 | 5.163323 | 5.007664 |
| ILMN_2476329 | Whrn      | 0.489667 | 0.470782 | 1.035    | 0.564218 | 7.135422 | 8.353933 | 0.001154 | 0.013926 | 6.63656  | 7.126227 | 7.107342 |
| ILMN_1221920 | LOC381297 | 0.478156 | 0.59351  | 0.784272 | 0.190763 | 8.898135 | 8.352437 | 0.001155 | 0.013926 | 8.43415  | 8.912306 | 9.02766  |
| ILMN_2712066 | Pgd       | 0.651885 | 0.408604 | 0.417153 | 0.008549 | 12.11959 | 8.350833 | 0.001156 | 0.013926 | 11.75018 | 12.40206 | 12.15878 |
| ILMN_2637203 | Rfc5      | -0.57816 | -0.63766 | -0.55201 | 0.085658 | 8.242481 | 8.350712 | 0.001156 | 0.013926 | 8.684438 | 8.10628  | 8.046774 |
| ILMN_2804973 | Zfp639    | -0.75028 | -0.56899 | -0.34602 | 0.222968 | 8.599044 | 8.345042 | 0.00116  | 0.013963 | 9.015366 | 8.265085 | 8.446379 |
| ILMN_2768841 | Rab22a    | 0.871743 | 0.720812 | 1.032478 | 0.311666 | 5.554919 | 8.338025 | 0.001165 | 0.014004 | 4.898661 | 5.770403 | 5.619473 |
| ILMN_1257579 | Nup210    | 0.846042 | 0.492173 | 0.915572 | 0.423399 | 9.119116 | 8.337859 | 0.001165 | 0.014004 | 8.55567  | 9.401711 | 9.047842 |
| ILMN_2749847 | Gtf2e2    | -0.43836 | -0.48515 | -0.61406 | -0.12891 | 8.316777 | 8.336659 | 0.001166 | 0.014004 | 8.701169 | 8.262808 | 8.216022 |
| ILMN_2716014 | Mrps5     | -0.06079 | -0.44362 | -0.52962 | -0.086   | 8.362088 | 8.331903 | 0.001169 | 0.014032 | 8.620592 | 8.559807 | 8.176976 |
| ILMN_2682778 | 2400009B1 | -0.8306  | -0.28118 | -0.52932 | -0.24814 | 8.131972 | 8.330055 | 0.00117  | 0.014032 | 8.542247 | 7.711648 | 8.261068 |
| ILMN_2484918 | Vti1a     | -0.49409 | -0.6561  | -0.90216 | -0.24606 | 8.545524 | 8.329048 | 0.001171 | 0.014032 | 9.058611 | 8.564524 | 8.402511 |
| ILMN_2624809 | MTERF     | -0.52065 | -0.41181 | -0.01397 | 0.397835 | 7.458625 | 8.328746 | 0.001171 | 0.014032 | 7.695231 | 7.174586 | 7.283425 |
| ILMN_1214998 | Hsd11b1   | -1.26926 | -0.73779 | -0.64901 | 0.08878  | 7.973513 | 8.324246 | 0.001174 | 0.01406  | 8.637531 | 7.36827  | 7.899736 |
| ILMN_2751228 | D11Ertd60 | -0.81065 | -0.5167  | -0.64408 | -0.12738 | 4.872193 | 8.32055  | 0.001177 | 0.014081 | 5.365051 | 4.554404 | 4.848349 |
| ILMN_2934120 | Hist2h3b  | -0.50405 | -0.54754 | -0.61911 | -0.07157 | 9.25432  | 8.317567 | 0.001179 | 0.014097 | 9.671992 | 9.167945 | 9.124455 |
| ILMN_2931779 | Wdr45l    | -0.81083 | -0.34276 | -0.61854 | -0.27578 | 9.902887 | 8.314031 | 0.001182 | 0.014115 | 10.34592 | 9.535085 | 10.00316 |
| ILMN_2806700 | Cyba      | -1.26611 | -0.91697 | -0.47614 | 0.440829 | 10.76784 | 8.313143 | 0.001182 | 0.014115 | 11.43264 | 10.16653 | 10.51567 |
| ILMN_2617977 | 2010109I0 | -2.24131 | -1.23191 | -0.50472 | 0.727194 | 11.52564 | 8.308263 | 0.001186 | 0.014146 | 12.52012 | 10.27881 | 11.28821 |
| ILMN_2688740 | Foxj3     | 0.828529 | 0.601844 | 0.307218 | -0.29463 | 6.039283 | 8.301751 | 0.00119  | 0.014185 | 5.604885 | 6.433415 | 6.206729 |
| ILMN_3157483 | Ets1      | 0.67563  | 0.889831 | 0.857384 | -0.03245 | 8.321215 | 8.301473 | 0.00119  | 0.014185 | 7.715504 | 8.391134 | 8.605335 |
| ILMN_3000318 | Adrbk1    | 0.77127  | 0.509541 | 0.779025 | 0.269484 | 10.31889 | 8.288643 | 0.0012   | 0.014284 | 9.803929 | 10.5752  | 10.31347 |
| ILMN_1233889 | 1810003N2 | -0.79946 | -0.72188 | -0.83269 | -0.11081 | 9.210969 | 8.278762 | 0.001207 | 0.014346 | 9.799479 | 9.000017 | 9.077596 |
| ILMN_2755224 | Cdca4     | -0.00151 | -0.51976 | -0.51207 | 0.007697 | 6.100468 | 8.278226 | 0.001207 | 0.014346 | 6.358802 | 6.357295 | 5.839038 |
| ILMN_1214163 | B230380D  | 0.300728 | 0.603124 | 0.65772  | 0.054596 | 5.940493 | 8.278041 | 0.001207 | 0.014346 | 5.550099 | 5.850828 | 6.153224 |
| ILMN_1221262 | 1810009A1 | -0.42113 | -0.2979  | -0.63935 | -0.34145 | 9.37943  | 8.274807 | 0.00121  | 0.014364 | 9.719024 | 9.297896 | 9.421124 |
| ILMN_2799217 | 2810441K1 | -0.65658 | -0.49971 | -0.53805 | -0.03833 | 7.276604 | 8.27149  | 0.001212 | 0.014383 | 7.700188 | 7.043609 | 7.200475 |
| ILMN_2705935 | Nme2      | -0.41585 | -0.30195 | -0.61947 | -0.31751 | 13.06017 | 8.265048 | 0.001217 | 0.014404 | 13.39449 | 12.97864 | 13.09254 |
| ILMN_1258965 | Tmem66    | 0.431901 | 0.52263  | 0.396153 | -0.12648 | 11.51425 | 8.264739 | 0.001217 | 0.014404 | 11.17658 | 11.60848 | 11.69921 |

|              |           |          |          |          |          |          |          |          |          |          |          |          |
|--------------|-----------|----------|----------|----------|----------|----------|----------|----------|----------|----------|----------|----------|
| ILMN_1230890 | Fmo5      | 1.041314 | 0.655471 | 0.501283 | -0.15419 | 10.61485 | 8.264214 | 0.001217 | 0.014404 | 10.06533 | 11.10665 | 10.7208  |
| ILMN_2673599 | Actn4     | 0.675148 | 0.684672 | 0.8814   | 0.196728 | 11.36307 | 8.26404  | 0.001217 | 0.014404 | 10.80277 | 11.47792 | 11.48744 |
| ILMN_3163053 | Commd3    | -0.6486  | -0.44581 | -0.47505 | -0.02924 | 9.754374 | 8.263248 | 0.001218 | 0.014404 | 10.14674 | 9.498136 | 9.70093  |
| ILMN_2705097 | Deadc1    | -0.5706  | -0.49112 | -0.69793 | -0.20681 | 7.484707 | 8.262175 | 0.001219 | 0.014404 | 7.924619 | 7.354022 | 7.433501 |
| ILMN_2696339 | Fgfr1op   | -0.76287 | -0.24637 | -0.36072 | -0.11435 | 5.622211 | 8.258068 | 0.001222 | 0.01443  | 5.964703 | 5.201828 | 5.718331 |
| ILMN_3161250 | Usp30     | 0.860633 | 0.84625  | 0.744136 | -0.10211 | 5.534191 | 8.254479 | 0.001224 | 0.014451 | 4.921436 | 5.782069 | 5.767687 |
| ILMN_2756023 | Pcsk9     | -1.27545 | -1.31258 | -0.65994 | 0.652633 | 7.651097 | 8.251424 | 0.001227 | 0.014468 | 8.463089 | 7.18764  | 7.150513 |
| ILMN_2766315 | 1810017G1 | -0.54258 | -0.38168 | -0.59767 | -0.21599 | 11.12735 | 8.247698 | 0.001229 | 0.014486 | 11.50783 | 10.96525 | 11.12615 |
| ILMN_1219748 | Pxmp2     | -0.37819 | -0.43534 | -0.6398  | -0.20446 | 6.707998 | 8.246669 | 0.00123  | 0.014486 | 7.07133  | 6.693143 | 6.635992 |
| ILMN_1213307 | Ctdsp1    | 0.296738 | 0.5223   | 0.652458 | 0.130158 | 8.010689 | 8.245973 | 0.001231 | 0.014486 | 7.642816 | 7.939554 | 8.165115 |
| ILMN_3102736 | Gm129     | 1.115651 | -0.19655 | -0.22907 | -0.03252 | 5.115874 | 8.243482 | 0.001233 | 0.014492 | 4.943366 | 6.059017 | 4.746818 |
| ILMN_2627733 | 1200006F0 | 0.508436 | 0.705748 | 0.686141 | -0.01961 | 11.24718 | 8.243077 | 0.001233 | 0.014492 | 10.7721  | 11.28053 | 11.47785 |
| ILMN_2975956 | Sf3b5     | -0.50085 | -0.36432 | -0.46723 | -0.10291 | 10.94047 | 8.240639 | 0.001235 | 0.014503 | 11.27358 | 10.77273 | 10.90925 |
| ILMN_2744693 | 1110021HC | -0.36434 | -0.38464 | -0.55973 | -0.17509 | 11.03473 | 8.233335 | 0.00124  | 0.014557 | 11.3619  | 10.99756 | 10.97727 |
| ILMN_2657432 | Bpy2ip1   | 0.513415 | 0.408262 | 0.568064 | 0.159802 | 6.085118 | 8.228138 | 0.001244 | 0.014593 | 5.712682 | 6.226097 | 6.120944 |
| ILMN_2745259 | Emd       | -0.23418 | -0.48591 | -0.69111 | -0.2052  | 6.855488 | 8.2251   | 0.001246 | 0.014599 | 7.208289 | 6.974108 | 6.722379 |
| ILMN_2660851 | Bcl10     | -0.57255 | -0.46056 | -0.38148 | 0.079073 | 9.824666 | 8.224899 | 0.001246 | 0.014599 | 10.17831 | 9.605763 | 9.717756 |
| ILMN_3163001 | Depdc6    | 1.145093 | 0.748287 | 1.113417 | 0.365131 | 7.482274 | 8.223558 | 0.001247 | 0.014599 | 6.730575 | 7.875668 | 7.478861 |
| ILMN_1242178 | Adh5      | 0.359617 | -0.1683  | -0.36519 | -0.19688 | 8.723768 | 8.22225  | 0.001248 | 0.014599 | 8.767237 | 9.126854 | 8.598934 |
| ILMN_2438771 | Fubp3     | -0.71527 | -0.29658 | -0.07792 | 0.218668 | 9.688926 | 8.221294 | 0.001249 | 0.014599 | 9.961368 | 9.246098 | 9.664785 |
| ILMN_2929031 | Mrpl49    | -0.60551 | -0.34716 | -0.81058 | -0.46343 | 6.530273 | 8.219046 | 0.001251 | 0.014599 | 6.971085 | 6.365579 | 6.623929 |
| ILMN_2745741 | F830029L2 | 0.832773 | 0.673819 | 0.533594 | -0.14022 | 7.98649  | 8.218524 | 0.001251 | 0.014599 | 7.476443 | 8.309216 | 8.150262 |
| ILMN_3034381 | Nup88     | 0.845808 | 0.224119 | -0.12321 | -0.34733 | 5.878606 | 8.218492 | 0.001251 | 0.014599 | 5.641926 | 6.487734 | 5.866045 |
| ILMN_2711401 | 3200002M  | -0.08365 | -0.43696 | -0.69519 | -0.25823 | 6.019785 | 8.214976 | 0.001254 | 0.014621 | 6.323732 | 6.240084 | 5.886777 |
| ILMN_2997923 | Apoa1bp   | -0.21818 | -0.29714 | -0.56199 | -0.26485 | 10.0899  | 8.211225 | 0.001257 | 0.014636 | 10.35923 | 10.14106 | 10.06209 |
| ILMN_2755915 | Pet112l   | -0.09051 | -0.07176 | -0.68593 | -0.61417 | 5.749439 | 8.210063 | 0.001258 | 0.014636 | 5.961489 | 5.870982 | 5.88973  |
| ILMN_2779858 | S100a14   | -0.98288 | -1.11458 | -0.85119 | 0.263397 | 5.668319 | 8.209932 | 0.001258 | 0.014636 | 6.405481 | 5.422605 | 5.290897 |
| ILMN_2622217 | Myh11     | 0.47912  | 1.136741 | 1.752018 | 0.615277 | 10.02855 | 8.207195 | 0.00126  | 0.01465  | 9.186576 | 9.665696 | 10.32332 |
| ILMN_2764883 | Mafg      | 0.55477  | 0.488956 | 0.760046 | 0.27109  | 7.395852 | 8.204019 | 0.001262 | 0.014668 | 6.944909 | 7.49968  | 7.433865 |
| ILMN_2606719 | Abcc2     | 1.310982 | 1.128385 | 0.582597 | -0.54579 | 9.630463 | 8.202632 | 0.001263 | 0.014671 | 8.874972 | 10.18595 | 10.00336 |
| ILMN_1258394 | Aars      | 0.75028  | 0.555794 | 0.675565 | 0.119771 | 9.898095 | 8.201517 | 0.001264 | 0.014671 | 9.402685 | 10.15296 | 9.958479 |
| ILMN_2834294 | 6330442E1 | 1.412819 | 1.803286 | 1.635239 | -0.16805 | 8.201059 | 8.19237  | 0.001271 | 0.014732 | 6.988223 | 8.401042 | 8.791509 |
| ILMN_3150658 | Nme2      | -0.44596 | -0.32302 | -0.56728 | -0.24426 | 12.33727 | 8.192361 | 0.001271 | 0.014732 | 12.67134 | 12.22537 | 12.34832 |
| ILMN_1225373 | C1qbp     | -0.18183 | -0.69199 | -0.83282 | -0.14083 | 8.947145 | 8.185667 | 0.001276 | 0.014782 | 9.373806 | 9.191971 | 8.681816 |
| ILMN_2815479 | L3mbtl3   | 0.683752 | 0.891202 | 0.742819 | -0.14838 | 5.842046 | 8.174003 | 0.001285 | 0.014877 | 5.262602 | 5.946354 | 6.153804 |

|              |           |          |          |          |          |          |          |          |          |          |          |          |
|--------------|-----------|----------|----------|----------|----------|----------|----------|----------|----------|----------|----------|----------|
| ILMN_2589615 | Pthr1     | -1.17001 | -0.58587 | -0.73476 | -0.14889 | 7.546684 | 8.172334 | 0.001287 | 0.014882 | 8.169345 | 6.999336 | 7.583475 |
| ILMN_2816876 | Hrsp12    | -0.61305 | -0.62064 | -0.90193 | -0.2813  | 7.565775 | 8.16635  | 0.001291 | 0.014926 | 8.09968  | 7.486633 | 7.479042 |
| ILMN_2808939 | 0610007P1 | -0.67019 | -0.3927  | -0.51111 | -0.11841 | 10.00501 | 8.162792 | 0.001294 | 0.014948 | 10.39851 | 9.728315 | 10.00581 |
| ILMN_2637804 | 4933407P1 | -0.34436 | -0.69812 | -0.68662 | 0.011495 | 6.131463 | 8.159494 | 0.001297 | 0.014968 | 6.563737 | 6.219378 | 5.865622 |
| ILMN_2756291 | BC026778  | 0.740193 | 0.868656 | 0.8533   | -0.01536 | 7.950217 | 8.154499 | 0.001301 | 0.015003 | 7.33468  | 8.074873 | 8.203336 |
| ILMN_3061923 | Rbms2     | -0.65713 | -0.36728 | -0.55954 | -0.19226 | 6.068796 | 8.144984 | 0.001308 | 0.015072 | 6.464784 | 5.80765  | 6.097504 |
| ILMN_1249408 | 2310016M  | -0.53736 | -0.34515 | -0.46615 | -0.12099 | 11.94695 | 8.143755 | 0.001309 | 0.015072 | 12.28411 | 11.74675 | 11.93896 |
| ILMN_2681604 | 2410005K1 | -0.70806 | -0.2271  | -0.23836 | -0.01126 | 8.804487 | 8.14361  | 0.001309 | 0.015072 | 9.097865 | 8.389804 | 8.87077  |
| ILMN_2791769 | Ddb2      | -0.80538 | -0.50988 | -0.61966 | -0.10977 | 6.461643 | 8.137122 | 0.001314 | 0.015117 | 6.945373 | 6.139991 | 6.435491 |
| ILMN_2806029 | Sfrs2     | -0.42971 | -0.69398 | -0.33594 | 0.358034 | 9.714647 | 8.136537 | 0.001315 | 0.015117 | 10.07955 | 9.649845 | 9.385578 |
| ILMN_1230444 | 2810408E1 | 0.931841 | 0.681469 | 0.535927 | -0.14554 | 5.524987 | 8.132597 | 0.001318 | 0.015143 | 4.987677 | 5.919519 | 5.669146 |
| ILMN_1214918 | 3010033PC | -0.86389 | -0.65817 | -0.44619 | 0.211977 | 10.68847 | 8.129437 | 0.00132  | 0.015162 | 11.18054 | 10.31664 | 10.52237 |
| ILMN_1218014 | C78915    | 0.4551   | 0.496982 | 0.467601 | -0.02938 | 8.014652 | 8.126482 | 0.001323 | 0.015179 | 7.659731 | 8.114831 | 8.156713 |
| ILMN_2852737 | Cdk1      | -0.13054 | 0.445991 | -0.07149 | -0.51748 | 4.785    | 8.124805 | 0.001324 | 0.015185 | 4.72401  | 4.593468 | 5.170002 |
| ILMN_2907972 | B3gnt3    | 0.841307 | 0.805399 | 0.684546 | -0.12085 | 10.106   | 8.120082 | 0.001328 | 0.015218 | 9.523189 | 10.3645  | 10.32859 |
| ILMN_1254814 | Clk1      | -0.85572 | -0.18412 | -0.17818 | 0.005944 | 6.85127  | 8.115812 | 0.001331 | 0.015248 | 7.155775 | 6.300055 | 6.971653 |
| ILMN_2638354 | Prdx2     | -0.51626 | -0.70729 | -0.52217 | 0.185121 | 7.932556 | 8.113898 | 0.001333 | 0.015255 | 8.368986 | 7.852729 | 7.661694 |
| ILMN_2894574 | B230339M  | 0.519647 | 0.367755 | 0.633896 | 0.266141 | 8.727093 | 8.109533 | 0.001336 | 0.015283 | 8.346769 | 8.866415 | 8.714524 |
| ILMN_3160750 | AA467197  | -1.19377 | -1.53306 | -0.4243  | 1.108755 | 10.93947 | 8.108742 | 0.001337 | 0.015283 | 11.72726 | 10.53348 | 10.1942  |
| ILMN_2624385 | 2010315L1 | -0.68274 | -0.49812 | -0.68417 | -0.18606 | 9.309096 | 8.105423 | 0.00134  | 0.015297 | 9.775352 | 9.092616 | 9.277236 |
| ILMN_2820098 | Med19     | -0.42721 | -0.67405 | -0.75555 | -0.08151 | 7.507611 | 8.105096 | 0.00134  | 0.015297 | 7.971814 | 7.5446   | 7.297769 |
| ILMN_2790357 | Sema7a    | 0.350848 | 0.833045 | 0.886924 | 0.053879 | 8.392931 | 8.101889 | 0.001343 | 0.015316 | 7.875226 | 8.226075 | 8.708271 |
| ILMN_3153982 | Btbd14a   | 0.213732 | 0.247972 | 0.645011 | 0.397039 | 9.806196 | 8.100281 | 0.001344 | 0.015321 | 9.529517 | 9.743249 | 9.777489 |
| ILMN_2593993 | Eif4e13   | -0.30606 | -0.43428 | -0.50179 | -0.06751 | 10.51958 | 8.094647 | 0.001349 | 0.015364 | 10.83011 | 10.52405 | 10.39583 |
| ILMN_2967294 | Dgcr6     | -0.82787 | -0.37833 | -0.30059 | 0.077736 | 9.548811 | 8.083637 | 0.001358 | 0.015457 | 9.925509 | 9.097641 | 9.547179 |
| ILMN_2472110 | Tmem14c   | -0.26258 | -0.34146 | -0.62594 | -0.28448 | 11.33249 | 8.079441 | 0.001361 | 0.015478 | 11.63998 | 11.3774  | 11.29852 |
| ILMN_2682223 | Slc2a9    | 0.837362 | 0.393889 | 0.216437 | -0.17745 | 7.243615 | 8.078501 | 0.001362 | 0.015478 | 6.881693 | 7.719055 | 7.275582 |
| ILMN_2620583 | 6720425G1 | 0.553193 | 0.452794 | 0.854788 | 0.401993 | 8.439888 | 8.077062 | 0.001363 | 0.015478 | 7.974694 | 8.527887 | 8.427488 |
| ILMN_1214050 | Med18     | -0.85581 | -0.52017 | -0.20554 | 0.31463  | 7.739888 | 8.077043 | 0.001363 | 0.015478 | 8.135267 | 7.279455 | 7.6151   |
| ILMN_1240726 | Mmp14     | 0.752223 | 0.676308 | 1.02378  | 0.347472 | 8.450777 | 8.074526 | 0.001365 | 0.015492 | 7.837699 | 8.589923 | 8.514008 |
| ILMN_2733356 | 2310067E0 | -0.28118 | 0.001813 | 0.701355 | 0.699541 | 9.462644 | 8.065358 | 0.001373 | 0.015568 | 9.357148 | 9.075963 | 9.358961 |
| ILMN_2787738 | Smyd5     | 0.535103 | -0.03027 | 0.010678 | 0.040945 | 5.087478 | 8.062388 | 0.001375 | 0.015577 | 4.9586   | 5.493702 | 4.928333 |
| ILMN_1259379 | Pdzd11    | -0.25065 | -0.61489 | -0.62943 | -0.01455 | 9.183502 | 8.062326 | 0.001375 | 0.015577 | 9.557244 | 9.306598 | 8.942356 |
| ILMN_2669699 | 1110017O1 | -0.67162 | -0.64471 | -0.69482 | -0.05011 | 4.999023 | 8.058824 | 0.001378 | 0.0156   | 5.501813 | 4.830189 | 4.857101 |
| ILMN_3096335 | Arrb1     | 0.437041 | 0.582208 | 0.971972 | 0.389764 | 6.93884  | 8.054861 | 0.001382 | 0.015622 | 6.441035 | 6.878076 | 7.023243 |

|              |            |          |           |          |          |          |          |          |          |          |          |          |
|--------------|------------|----------|-----------|----------|----------|----------|----------|----------|----------|----------|----------|----------|
| ILMN_1228359 | Rit1       | -0.70265 | -0.19221  | -0.08671 | 0.105501 | 9.345948 | 8.054152 | 0.001382 | 0.015622 | 9.59134  | 8.888692 | 9.399129 |
| ILMN_2903945 | Gadd45g    | -0.46873 | -0.59218  | 0.253145 | 0.845322 | 9.374007 | 8.053283 | 0.001383 | 0.015622 | 9.575948 | 9.107217 | 8.983771 |
| ILMN_2751948 | Hist2h2aa1 | -0.82193 | -0.41202  | -0.59866 | -0.18664 | 9.578789 | 8.047434 | 0.001388 | 0.015668 | 10.03694 | 9.215011 | 9.624923 |
| ILMN_2699933 | Qdpr       | -0.15693 | -0.34964  | -0.5961  | -0.24646 | 10.04961 | 8.045933 | 0.001389 | 0.015672 | 10.32527 | 10.16835 | 9.975636 |
| ILMN_2696855 | Taz        | -0.5431  | -0.33041  | -0.56059 | -0.23018 | 7.40661  | 8.044575 | 0.00139  | 0.015675 | 7.765135 | 7.222032 | 7.434729 |
| ILMN_2660438 | Tank       | -0.66598 | -0.69897  | -0.6187  | 0.080267 | 8.636086 | 8.038333 | 0.001396 | 0.015724 | 9.131999 | 8.466023 | 8.433027 |
| ILMN_2861331 | Pnrc2      | -0.70652 | -0.49538  | -0.48348 | 0.0119   | 10.74915 | 8.037226 | 0.001397 | 0.015725 | 11.17049 | 10.46397 | 10.67511 |
| ILMN_2800675 | Zfand2b    | -0.84984 | -0.27924  | -0.30591 | -0.02667 | 8.759661 | 8.033689 | 0.0014   | 0.015748 | 9.118408 | 8.268566 | 8.839172 |
| ILMN_2838372 | 201011110: | -0.60669 | -7.97E-06 | -0.42418 | -0.42417 | 7.001809 | 8.031481 | 0.001401 | 0.015759 | 7.25953  | 6.652835 | 7.259522 |
| ILMN_2733698 | Cox7a2     | -0.86691 | -0.76883  | -0.79991 | -0.03107 | 8.001808 | 8.02733  | 0.001405 | 0.015789 | 8.610719 | 7.743813 | 7.841886 |
| ILMN_3148398 | Eprs       | 0.646583 | 0.078086  | -0.04114 | -0.11923 | 5.044647 | 8.024279 | 0.001408 | 0.015808 | 4.873765 | 5.520348 | 4.951851 |
| ILMN_2837195 | 6720467CC  | -1.07756 | -0.70493  | -0.59667 | 0.108262 | 6.749196 | 8.020519 | 0.001411 | 0.015834 | 7.343986 | 6.266425 | 6.639055 |
| ILMN_2595846 | Surf4      | 0.53094  | 0.541937  | 0.42937  | -0.11257 | 10.78362 | 8.016672 | 0.001414 | 0.015861 | 10.40806 | 10.939   | 10.95    |
| ILMN_2670959 | Snrp70     | 0.761142 | 0.166588  | 0.483497 | 0.316909 | 7.317636 | 8.013942 | 0.001416 | 0.015878 | 6.96483  | 7.725971 | 7.131418 |
| ILMN_3161639 | Ssna1      | -0.53337 | -0.19825  | -0.53216 | -0.33391 | 9.349088 | 8.007922 | 0.001422 | 0.015921 | 9.665034 | 9.131666 | 9.46678  |
| ILMN_2691460 | Ndufa5     | -0.78915 | -0.73828  | -0.63791 | 0.100365 | 5.827344 | 8.00654  | 0.001423 | 0.015921 | 6.368677 | 5.579531 | 5.630401 |
| ILMN_2850849 | Cog1       | 0.532981 | 0.441056  | 0.635144 | 0.194088 | 8.0443   | 8.006346 | 0.001423 | 0.015921 | 7.642004 | 8.174985 | 8.083061 |
| ILMN_2998630 | Glt8d1     | -0.55111 | -0.59109  | -0.67874 | -0.08765 | 6.13708  | 8.003443 | 0.001426 | 0.015939 | 6.592314 | 6.041207 | 6.001225 |
| ILMN_2745555 | Mrps21     | -0.56965 | -0.51115  | -0.59026 | -0.07911 | 10.92822 | 7.995285 | 0.001433 | 0.016008 | 11.34598 | 10.77633 | 10.83483 |
| ILMN_2970623 | Cenpp      | -0.71988 | -0.46866  | -0.75465 | -0.28599 | 7.056259 | 7.994139 | 0.001434 | 0.016009 | 7.542056 | 6.822178 | 7.073398 |
| ILMN_2663114 | Skp2       | -0.21311 | -0.66372  | -0.48535 | 0.178368 | 5.087085 | 7.991811 | 0.001436 | 0.016022 | 5.427627 | 5.214521 | 4.763911 |
| ILMN_1258125 | Rab9       | 0.068305 | -0.05409  | -0.64514 | -0.59105 | 7.195929 | 7.987901 | 0.001439 | 0.01605  | 7.353659 | 7.421964 | 7.299569 |
| ILMN_1216183 | Ccl27      | -0.79601 | -0.33569  | -0.4308  | -0.09511 | 5.99055  | 7.984408 | 0.001442 | 0.016067 | 6.381178 | 5.585163 | 6.045483 |
| ILMN_2879225 | Trim23     | -0.55448 | -0.81335  | -0.5568  | 0.256545 | 5.566047 | 7.984005 | 0.001443 | 0.016067 | 6.047204 | 5.492723 | 5.233858 |
| ILMN_2998020 | Spcs1      | -0.56207 | -0.61704  | -0.49678 | 0.12026  | 12.29386 | 7.9826   | 0.001444 | 0.016071 | 12.71283 | 12.15076 | 12.09579 |
| ILMN_2728985 | Fbln1      | 0.626069 | 0.861278  | 0.648947 | -0.21233 | 8.196606 | 7.978047 | 0.001448 | 0.016105 | 7.662533 | 8.288602 | 8.523811 |
| ILMN_2739118 | Pex7       | -0.52247 | -0.51812  | -0.99113 | -0.47302 | 6.620837 | 7.974283 | 0.001451 | 0.016132 | 7.128766 | 6.6063   | 6.610649 |
| ILMN_2949122 | Ccdc58     | -0.50439 | -0.45468  | -0.81147 | -0.35679 | 10.07929 | 7.970789 | 0.001454 | 0.016156 | 10.52192 | 10.01753 | 10.06724 |
| ILMN_2684388 | 1700034H1  | -0.72566 | -0.64318  | -0.56008 | 0.083105 | 5.405198 | 7.966857 | 0.001458 | 0.016182 | 5.887429 | 5.161767 | 5.244247 |
| ILMN_2840818 | Cmpk       | -0.96044 | -0.64231  | -0.54904 | 0.093269 | 11.91129 | 7.966091 | 0.001459 | 0.016182 | 12.44924 | 11.4888  | 11.80692 |
| ILMN_2524776 | 2400006NC  | -0.66441 | -0.36546  | -0.63639 | -0.27093 | 7.07542  | 7.957561 | 0.001466 | 0.016257 | 7.491984 | 6.827574 | 7.126525 |
| ILMN_2879588 | Lhfp       | -1.06433 | -0.54727  | -0.68592 | -0.13865 | 6.859272 | 7.954065 | 0.001469 | 0.016276 | 7.433652 | 6.369326 | 6.886377 |
| ILMN_1254307 | 18100110:  | -0.82778 | -0.68733  | 0.005046 | 0.692374 | 8.206879 | 7.953514 | 0.00147  | 0.016276 | 8.584393 | 7.756618 | 7.897065 |
| ILMN_2993314 | Clec4n     | -0.83503 | -0.27103  | -0.64752 | -0.37649 | 7.766282 | 7.94655  | 0.001476 | 0.016336 | 8.204679 | 7.369647 | 7.933646 |
| ILMN_2939294 | Fis1       | -0.55358 | -0.40764  | -0.53628 | -0.12864 | 10.99689 | 7.939821 | 0.001482 | 0.016393 | 11.37127 | 10.81768 | 10.96362 |

|              |           |          |          |          |          |          |          |          |          |          |          |          |
|--------------|-----------|----------|----------|----------|----------|----------|----------|----------|----------|----------|----------|----------|
| ILMN_2758717 | Plscr4    | 1.58164  | 2.102339 | 0.833685 | -1.26865 | 8.184907 | 7.936256 | 0.001485 | 0.016418 | 7.055491 | 8.637131 | 9.15783  |
| ILMN_2752464 | 9130020LO | -1.88644 | -1.4953  | -1.19399 | 0.301316 | 6.184803 | 7.929156 | 0.001492 | 0.01646  | 7.328737 | 5.442295 | 5.833433 |
| ILMN_2648709 | Pard3     | 0.71344  | 0.252766 | 0.211833 | -0.04093 | 5.132696 | 7.928626 | 0.001492 | 0.01646  | 4.838186 | 5.551627 | 5.090953 |
| ILMN_2806880 | Lyrn2     | -0.70483 | -0.28941 | -0.42222 | -0.13281 | 7.417737 | 7.928524 | 0.001493 | 0.01646  | 7.771852 | 7.067018 | 7.482443 |
| ILMN_2999447 | 17001230C | -0.53728 | -0.44596 | -0.47299 | -0.02703 | 10.59762 | 7.928007 | 0.001493 | 0.01646  | 10.96167 | 10.42439 | 10.51571 |
| ILMN_2938704 | Il15      | -1.10209 | -0.4497  | -0.6647  | -0.215   | 8.738653 | 7.924947 | 0.001496 | 0.01648  | 9.292778 | 8.190684 | 8.843077 |
| ILMN_2968907 | Tipin     | -0.81824 | -0.54021 | -0.72785 | -0.18764 | 8.680134 | 7.919734 | 0.001501 | 0.016519 | 9.201706 | 8.38347  | 8.661499 |
| ILMN_1237518 | Dgkg      | 0.301793 | 0.309697 | 0.813104 | 0.503406 | 4.845901 | 7.919025 | 0.001501 | 0.016519 | 4.489753 | 4.791546 | 4.79945  |
| ILMN_2519677 | Triobp    | 0.377019 | 0.353622 | 0.688085 | 0.334463 | 10.29187 | 7.917762 | 0.001502 | 0.016522 | 9.937188 | 10.31421 | 10.29081 |
| ILMN_3161120 | 4930403C1 | -0.55421 | -0.20769 | 0.745432 | 0.953118 | 6.3688   | 7.913576 | 0.001506 | 0.016554 | 6.372917 | 5.818703 | 6.165231 |
| ILMN_1252673 | Cugbp2    | -0.16588 | 0.354184 | 0.786073 | 0.431889 | 6.564208 | 7.909479 | 0.00151  | 0.016585 | 6.320615 | 6.154731 | 6.674799 |
| ILMN_1247694 | Chordc1   | 0.387007 | -0.22419 | -0.20364 | 0.020551 | 9.661856 | 7.908504 | 0.001511 | 0.016585 | 9.672062 | 10.05907 | 9.447871 |
| ILMN_2908070 | Gtse1     | 0.947138 | 0.320463 | 0.467808 | 0.147345 | 6.358043 | 7.903664 | 0.001515 | 0.016624 | 5.924191 | 6.871329 | 6.244654 |
| ILMN_1228049 | a         | -0.9452  | -0.87772 | -0.81256 | 0.065161 | 4.872421 | 7.893763 | 0.001525 | 0.016715 | 5.531293 | 4.586093 | 4.653568 |
| ILMN_1247582 | Snrpa     | 0.800893 | -0.04205 | -0.01558 | 0.026469 | 8.316152 | 7.887158 | 0.001531 | 0.016772 | 8.130338 | 8.931231 | 8.088285 |
| ILMN_2640995 | Spire2    | 0.321878 | 0.59617  | 0.567868 | -0.0283  | 8.526188 | 7.884065 | 0.001534 | 0.016794 | 8.154709 | 8.476586 | 8.750879 |
| ILMN_2956448 | Creb3l2   | 1.133756 | 1.153158 | 1.077338 | -0.07582 | 7.577163 | 7.881205 | 0.001537 | 0.016813 | 6.7361   | 7.869856 | 7.889258 |
| ILMN_2859917 | Tmem53    | -0.61962 | -0.46044 | -0.10061 | 0.359839 | 7.971009 | 7.879438 | 0.001538 | 0.01682  | 8.266177 | 7.646555 | 7.805733 |
| ILMN_2684300 | 6030457N1 | -0.58295 | -0.33063 | -0.39079 | -0.06016 | 8.417911 | 7.875019 | 0.001542 | 0.016856 | 8.744004 | 8.161052 | 8.413376 |
| ILMN_3009260 | Coq2      | -0.73009 | -0.64637 | -0.48833 | 0.158038 | 8.60411  | 7.872175 | 0.001545 | 0.016875 | 9.070307 | 8.340218 | 8.423939 |
| ILMN_2759749 | Syap1     | -0.67386 | -0.42972 | -0.59834 | -0.16862 | 9.302236 | 7.869399 | 0.001548 | 0.016883 | 9.727717 | 9.05386  | 9.297995 |
| ILMN_1250815 | Wsb1      | -0.90277 | -0.52589 | -0.29784 | 0.22805  | 8.696925 | 7.869358 | 0.001548 | 0.016883 | 9.128549 | 8.225778 | 8.602661 |
| ILMN_2855397 | Hgs       | 0.716633 | 0.508634 | 0.62932  | 0.120687 | 8.888717 | 7.867432 | 0.00155  | 0.016887 | 8.42507  | 9.141703 | 8.933704 |
| ILMN_2704499 | Hprt      | -0.58285 | -0.63915 | -0.62722 | 0.011927 | 11.5859  | 7.866967 | 0.00155  | 0.016887 | 12.04821 | 11.46536 | 11.40906 |
| ILMN_2651190 | Gosr2     | 0.710347 | 0.627681 | 0.611796 | -0.01589 | 9.046803 | 7.864686 | 0.001552 | 0.0169   | 8.559346 | 9.269693 | 9.187028 |
| ILMN_2710229 | Ccng1     | -0.59482 | -0.69253 | -0.86645 | -0.17391 | 7.791177 | 7.860858 | 0.001556 | 0.016929 | 8.329628 | 7.734808 | 7.637093 |
| ILMN_3134412 | Dph3      | -0.59184 | -0.34115 | -0.53046 | -0.18931 | 6.957791 | 7.857818 | 0.001559 | 0.016948 | 7.323652 | 6.731816 | 6.982503 |
| ILMN_2972646 | Pdzd11    | -0.51582 | -0.61281 | -0.84759 | -0.23478 | 8.581523 | 7.857072 | 0.00156  | 0.016948 | 9.075577 | 8.559758 | 8.462769 |
| ILMN_2944784 | Ddx27     | 0.432303 | -0.12636 | -0.31531 | -0.18895 | 8.454825 | 7.852701 | 0.001564 | 0.016983 | 8.457167 | 8.88947  | 8.330804 |
| ILMN_1248132 | Stmn1     | -0.41138 | -0.76174 | -0.63016 | 0.131579 | 4.903703 | 7.844078 | 0.001572 | 0.01705  | 5.354522 | 4.943138 | 4.592786 |
| ILMN_2651706 | Dtx4      | 0.489022 | 0.505661 | 0.630959 | 0.125298 | 5.817724 | 7.843701 | 0.001573 | 0.01705  | 5.411314 | 5.900336 | 5.916974 |
| ILMN_2629748 | Dhx9      | 1.156761 | 0.791123 | 0.671341 | -0.11978 | 6.618291 | 7.843244 | 0.001573 | 0.01705  | 5.963485 | 7.120246 | 6.754608 |
| ILMN_2891104 | Tmco4     | 0.560659 | 0.224102 | 0.11113  | -0.11297 | 8.466196 | 7.836274 | 0.00158  | 0.017113 | 8.242223 | 8.802883 | 8.466326 |
| ILMN_1255438 | C530044N1 | 0.607995 | 0.224638 | 0.292203 | 0.067566 | 10.71241 | 7.832883 | 0.001583 | 0.017138 | 10.4312  | 11.03919 | 10.65583 |
| ILMN_2801568 | Acn9      | -0.65161 | -0.63542 | -1.14538 | -0.50996 | 7.63968  | 7.827381 | 0.001588 | 0.017176 | 8.247783 | 7.596172 | 7.612365 |

|              |           |          |          |          |          |          |          |          |          |          |          |          |
|--------------|-----------|----------|----------|----------|----------|----------|----------|----------|----------|----------|----------|----------|
| ILMN_2919999 | Jam4      | -0.32079 | -0.13738 | -0.55751 | -0.42013 | 10.51021 | 7.827355 | 0.001589 | 0.017176 | 10.76413 | 10.44334 | 10.62675 |
| ILMN_2717470 | Als2      | 0.711449 | 0.272909 | 0.261023 | -0.01189 | 8.739138 | 7.821879 | 0.001594 | 0.017223 | 8.427792 | 9.139242 | 8.700701 |
| ILMN_2822477 | Ppnr      | 0.250391 | 0.792583 | 1.488469 | 0.695886 | 5.840538 | 7.811209 | 0.001604 | 0.017327 | 5.207677 | 5.458068 | 6.00026  |
| ILMN_2989955 | Bmp1      | 1.043759 | 1.46591  | 0.919109 | -0.5468  | 9.008027 | 7.807143 | 0.001609 | 0.017359 | 8.150832 | 9.194591 | 9.616742 |
| ILMN_2783519 | Acadl     | 1.302471 | 1.432647 | 0.195641 | -1.23701 | 7.055802 | 7.800362 | 0.001615 | 0.017422 | 6.323113 | 7.625583 | 7.755759 |
| ILMN_2993720 | Comm6     | -0.61637 | -0.33269 | -0.5472  | -0.21451 | 10.54023 | 7.796749 | 0.001619 | 0.01745  | 10.9143  | 10.29793 | 10.58161 |
| ILMN_2809988 | Thumpd3   | -0.15765 | -0.38654 | -0.52198 | -0.13543 | 8.339362 | 7.789868 | 0.001626 | 0.017514 | 8.605905 | 8.448252 | 8.219361 |
| ILMN_2805029 | Dctn3     | -0.50681 | -0.39949 | -0.54248 | -0.14299 | 10.95875 | 7.78715  | 0.001629 | 0.017525 | 11.32095 | 10.81414 | 10.92146 |
| ILMN_3041839 | Pdhhb     | 0.492105 | -0.05148 | -0.25414 | -0.20266 | 8.601821 | 7.786072 | 0.00163  | 0.017525 | 8.555199 | 9.047305 | 8.50372  |
| ILMN_2628188 | Fgfr1op2  | -0.35996 | -0.40878 | -0.64318 | -0.2344  | 8.024583 | 7.785873 | 0.00163  | 0.017525 | 8.377563 | 8.017605 | 7.968781 |
| ILMN_1236892 | D6Ertd365 | -0.7711  | -0.58992 | -0.54916 | 0.040755 | 8.653885 | 7.784191 | 0.001632 | 0.017532 | 9.131431 | 8.360329 | 8.541513 |
| ILMN_1223384 | Nadsyn1   | 0.806282 | -0.11339 | -0.25988 | -0.14649 | 6.806297 | 7.781702 | 0.001634 | 0.017548 | 6.698043 | 7.504326 | 6.584651 |
| ILMN_2662036 | 170011312 | -0.68809 | -0.5886  | -0.73749 | -0.14889 | 5.186162 | 7.780733 | 0.001635 | 0.017548 | 5.689708 | 5.001615 | 5.101109 |
| ILMN_2759058 | Rnf103    | 0.443265 | 0.476642 | 0.463695 | -0.01295 | 11.21224 | 7.779314 | 0.001636 | 0.017553 | 10.86633 | 11.3096  | 11.34298 |
| ILMN_3069857 | Eprs      | 1.060708 | 0.092176 | 0.318831 | 0.226655 | 5.597244 | 7.777497 | 0.001638 | 0.017562 | 5.229316 | 6.290023 | 5.321492 |
| ILMN_2665063 | Slc11a2   | 0.644931 | 0.317453 | 0.470546 | 0.153093 | 7.651844 | 7.776433 | 0.001639 | 0.017562 | 7.293611 | 7.938542 | 7.611064 |
| ILMN_2606579 | Gpsn2     | 0.756331 | 0.394413 | 0.140066 | -0.25435 | 10.91291 | 7.768963 | 0.001647 | 0.01763  | 10.59021 | 11.34654 | 10.98462 |
| ILMN_2982316 | Zcwpw1    | -0.53476 | -0.77331 | -0.58914 | 0.184171 | 4.85671  | 7.768284 | 0.001648 | 0.01763  | 5.331012 | 4.796248 | 4.557705 |
| ILMN_1248555 | Gns       | 0.708303 | 0.690606 | 0.743024 | 0.052418 | 9.726061 | 7.765258 | 0.001651 | 0.017649 | 9.190577 | 9.898881 | 9.881183 |
| ILMN_2809571 | Tmem136   | -0.01152 | 0.216603 | 0.671411 | 0.454808 | 4.746452 | 7.764582 | 0.001652 | 0.017649 | 4.527328 | 4.515811 | 4.743931 |
| ILMN_2672543 | DXImx50e  | 0.808942 | 0.927385 | 0.898486 | -0.0289  | 9.364751 | 7.762448 | 0.001654 | 0.017661 | 8.706047 | 9.514989 | 9.633433 |
| ILMN_1227867 | Klra7     | -0.58745 | -0.7772  | -0.06957 | 0.707629 | 5.30158  | 7.76117  | 0.001655 | 0.017664 | 5.660135 | 5.07268  | 4.882939 |
| ILMN_1254113 | Snx2      | -0.02599 | -0.25202 | -0.55362 | -0.30161 | 7.413644 | 7.758161 | 0.001658 | 0.017687 | 7.621552 | 7.595561 | 7.369535 |
| ILMN_2630641 | Srm       | 0.44504  | -0.14712 | -0.57696 | -0.42984 | 7.528734 | 7.757044 | 0.001659 | 0.017688 | 7.598494 | 8.043534 | 7.451374 |
| ILMN_3162369 | Fbxo33    | -0.48934 | -0.44831 | -0.75924 | -0.31092 | 7.546991 | 7.754503 | 0.001662 | 0.017703 | 7.971214 | 7.481875 | 7.5229   |
| ILMN_1247245 | BC003266  | -0.66866 | -0.29733 | -0.41493 | -0.1176  | 8.777801 | 7.75371  | 0.001663 | 0.017703 | 9.123033 | 8.454368 | 8.825704 |
| ILMN_2981821 | Mrps7     | -0.50304 | -0.52993 | -0.77297 | -0.24305 | 8.739417 | 7.750255 | 0.001666 | 0.017705 | 9.190902 | 8.687866 | 8.660973 |
| ILMN_2651359 | BB114266  | -1.05911 | -1.08895 | -1.26281 | -0.17386 | 6.864508 | 7.749749 | 0.001667 | 0.017705 | 7.717228 | 6.658116 | 6.628273 |
| ILMN_2798576 | Zdhhc15   | -0.43958 | -0.81131 | -0.89224 | -0.08093 | 5.240268 | 7.74765  | 0.001669 | 0.017705 | 5.776049 | 5.336471 | 4.96474  |
| ILMN_1226275 | Mtrf1l    | -0.92509 | -1.18119 | -0.96273 | 0.21846  | 5.545095 | 7.746681 | 0.00167  | 0.017705 | 6.312348 | 5.387254 | 5.13116  |
| ILMN_1218325 | Atp6v1f   | -0.56935 | -0.24147 | -0.28643 | -0.04496 | 12.19751 | 7.746629 | 0.00167  | 0.017705 | 12.47182 | 11.90248 | 12.23036 |
| ILMN_1245658 | Nxt2      | -0.77403 | -0.49551 | -0.49448 | 0.001025 | 9.699416 | 7.746484 | 0.00167  | 0.017705 | 10.14042 | 9.366392 | 9.644913 |
| ILMN_2892856 | Rnf167    | 0.420855 | 0.777308 | 0.455249 | -0.32206 | 9.924596 | 7.745946 | 0.001671 | 0.017705 | 9.511243 | 9.932098 | 10.28855 |
| ILMN_1256186 | Wdr8      | -0.25359 | -0.18917 | -0.72554 | -0.53637 | 6.049404 | 7.74564  | 0.001671 | 0.017705 | 6.341477 | 6.087886 | 6.152312 |
| ILMN_1220726 | Satb1     | 0.300976 | 0.661933 | 1.066248 | 0.404315 | 6.058365 | 7.743856 | 0.001673 | 0.017714 | 5.551076 | 5.852051 | 6.213009 |

|              |           |          |          |          |          |          |          |          |          |          |          |          |
|--------------|-----------|----------|----------|----------|----------|----------|----------|----------|----------|----------|----------|----------|
| ILMN_2692853 | C030006K1 | 0.694884 | 0.302275 | 0.275245 | -0.02703 | 6.630226 | 7.741663 | 0.001675 | 0.017721 | 6.312125 | 7.00701  | 6.6144   |
| ILMN_2713673 | 2310016AC | -0.70975 | -0.80573 | -0.90751 | -0.10179 | 7.824267 | 7.74133  | 0.001676 | 0.017721 | 8.430015 | 7.720263 | 7.624289 |
| ILMN_2616274 | Dot1l     | 0.610135 | 0.694182 | 0.730902 | 0.03672  | 5.929361 | 7.738023 | 0.001679 | 0.017746 | 5.420557 | 6.030692 | 6.114739 |
| ILMN_1242391 | Tmem8     | 0.586318 | 0.691495 | 0.796996 | 0.1055   | 9.08513  | 7.735851 | 0.001681 | 0.01775  | 8.566428 | 9.152746 | 9.257923 |
| ILMN_1245874 | Ptpn11    | 0.696493 | 0.655887 | 0.760664 | 0.104777 | 6.698192 | 7.735771 | 0.001681 | 0.01775  | 6.169931 | 6.866424 | 6.825818 |
| ILMN_2640971 | Pafah1b3  | -0.54554 | -0.49688 | -0.64528 | -0.1484  | 10.66597 | 7.733113 | 0.001684 | 0.017751 | 11.08789 | 10.54236 | 10.59101 |
| ILMN_1251766 | 2310045BC | -0.70377 | -0.30377 | -0.45416 | -0.1504  | 8.722492 | 7.732219 | 0.001685 | 0.017751 | 9.087916 | 8.384147 | 8.784149 |
| ILMN_1259822 | Caskin2   | 0.228784 | 0.325738 | 0.597995 | 0.272257 | 7.909257 | 7.731792 | 0.001686 | 0.017751 | 7.621128 | 7.849912 | 7.946866 |
| ILMN_2733542 | Fbxl3a    | -0.97743 | -0.50127 | -0.47442 | 0.026846 | 9.611684 | 7.731716 | 0.001686 | 0.017751 | 10.09997 | 9.122532 | 9.598698 |
| ILMN_2698799 | Actb      | 0.460399 | 0.239542 | 0.546731 | 0.307189 | 13.60262 | 7.729659 | 0.001688 | 0.017763 | 13.29095 | 13.75135 | 13.53049 |
| ILMN_2847618 | Ift20     | -0.53627 | -0.50208 | -0.23026 | 0.271818 | 12.22627 | 7.727242 | 0.00169  | 0.017779 | 12.54342 | 12.00715 | 12.04134 |
| ILMN_2694917 | Sap30     | -0.54257 | -0.35985 | -0.55526 | -0.19542 | 10.27308 | 7.717939 | 0.0017   | 0.017872 | 10.6375  | 10.09492 | 10.27765 |
| ILMN_2829171 | Hnrpf     | 0.571249 | 0.00646  | -0.00194 | -0.0084  | 8.423613 | 7.713456 | 0.001705 | 0.017906 | 8.279671 | 8.850919 | 8.286131 |
| ILMN_2691815 | E430034LO | 0.712898 | 0.415401 | 0.305882 | -0.10952 | 6.281269 | 7.71227  | 0.001706 | 0.017906 | 5.922723 | 6.635621 | 6.338125 |
| ILMN_2857581 | Rarsl     | 0.13968  | -0.19059 | -0.4895  | -0.29891 | 9.127147 | 7.711964 | 0.001706 | 0.017906 | 9.262252 | 9.401932 | 9.071657 |
| ILMN_2940440 | Ganab     | 0.733358 | 0.620246 | 0.555258 | -0.06499 | 7.857203 | 7.70911  | 0.00171  | 0.017926 | 7.379988 | 8.113345 | 8.000234 |
| ILMN_1233481 | Actr10    | -0.478   | -0.4266  | -0.42789 | -0.00128 | 10.15461 | 7.708261 | 0.00171  | 0.017926 | 10.48773 | 10.00974 | 10.06113 |
| ILMN_3121851 | Ppp2r5c   | 0.643654 | 0.493735 | -0.05425 | -0.54798 | 10.69981 | 7.706978 | 0.001712 | 0.017929 | 10.42903 | 11.07268 | 10.92276 |
| ILMN_2592507 | Ppp1r9b   | 0.526963 | 0.593224 | 0.827643 | 0.234419 | 6.801344 | 7.704825 | 0.001714 | 0.017943 | 6.314387 | 6.84135  | 6.90761  |
| ILMN_2681241 | Birc5     | -0.4112  | -0.38032 | -0.86256 | -0.48224 | 9.046819 | 7.703538 | 0.001715 | 0.017946 | 9.460339 | 9.049135 | 9.080023 |
| ILMN_2667614 | 1110007CC | -0.70171 | -0.45437 | -0.33413 | 0.120247 | 8.958461 | 7.700398 | 0.001719 | 0.017962 | 9.331014 | 8.629303 | 8.87664  |
| ILMN_2773789 | Pard6a    | -0.56814 | -0.51388 | -0.44833 | 0.065556 | 6.214321 | 7.700249 | 0.001719 | 0.017962 | 6.596909 | 6.02877  | 6.083025 |
| ILMN_2664491 | Snx2      | -0.07897 | -0.40736 | -0.65803 | -0.25066 | 7.394099 | 7.697008 | 0.001722 | 0.017987 | 7.680189 | 7.601223 | 7.272824 |
| ILMN_2506115 | Ulk1      | 0.268236 | 0.530066 | 0.627552 | 0.097486 | 6.504662 | 7.696053 | 0.001723 | 0.017987 | 6.148199 | 6.416435 | 6.678264 |
| ILMN_2874853 | Eef1b2    | -1.09592 | -1.13318 | -0.99054 | 0.142639 | 8.789539 | 7.688405 | 0.001732 | 0.018062 | 9.594449 | 8.498534 | 8.461268 |
| ILMN_2624280 | Rps27l    | -0.535   | -0.50653 | -0.62407 | -0.11753 | 13.31923 | 7.686813 | 0.001733 | 0.018069 | 13.73563 | 13.20063 | 13.22909 |
| ILMN_2733695 | Dstn      | -0.64866 | -0.56889 | -0.62392 | -0.05502 | 4.710837 | 7.683695 | 0.001737 | 0.018094 | 5.171204 | 4.522546 | 4.60231  |
| ILMN_3059798 | Foxk1     | 0.960897 | 0.381643 | 0.643015 | 0.261371 | 5.604827 | 7.682263 | 0.001738 | 0.018099 | 5.108438 | 6.069335 | 5.490082 |
| ILMN_2594103 | Rps3      | -0.69296 | -0.47258 | -0.54025 | -0.06767 | 12.91011 | 7.678749 | 0.001742 | 0.018121 | 13.33656 | 12.6436  | 12.86397 |
| ILMN_2481391 | Zfp326    | 0.859004 | 0.132096 | 0.406608 | 0.274513 | 5.564282 | 7.677523 | 0.001744 | 0.018121 | 5.214855 | 6.073859 | 5.346951 |
| ILMN_1214664 | Glrx2     | -0.55404 | -0.82184 | -0.63522 | 0.186612 | 6.745684 | 7.677465 | 0.001744 | 0.018121 | 7.24846  | 6.694419 | 6.426623 |
| ILMN_2711651 | 4930403OC | -1.17583 | -0.93292 | -0.70697 | 0.225947 | 9.299743 | 7.676097 | 0.001745 | 0.018126 | 10.00367 | 8.827844 | 9.070755 |
| ILMN_2596979 | Nrarp     | 0.694385 | 0.528914 | 0.501051 | -0.02786 | 8.730773 | 7.67408  | 0.001747 | 0.018138 | 8.299685 | 8.994071 | 8.828599 |
| ILMN_2913590 | Lonp2     | 0.573178 | 0.005012 | -0.00402 | -0.00903 | 9.978356 | 7.668836 | 0.001753 | 0.018186 | 9.834814 | 10.40799 | 9.839826 |
| ILMN_2737200 | Mbp       | -0.29269 | 0.198401 | 0.635263 | 0.436861 | 5.799503 | 7.666501 | 0.001756 | 0.018202 | 5.664259 | 5.371572 | 5.86266  |



|              |           |          |          |          |          |          |          |          |          |          |          |          |
|--------------|-----------|----------|----------|----------|----------|----------|----------|----------|----------|----------|----------|----------|
| ILMN_2718350 | 9030221M  | 0.389473 | -0.24324 | -0.44602 | -0.20277 | 5.713436 | 7.658031 | 0.001765 | 0.018288 | 5.788383 | 6.177856 | 5.54514  |
| ILMN_3142104 | Tmprss9   | 0.819702 | 1.612629 | 0.568386 | -1.04424 | 5.427259 | 7.655935 | 0.001767 | 0.01829  | 4.677079 | 5.496782 | 6.289708 |
| ILMN_2768936 | Coro2a    | 0.724152 | 0.316971 | 0.411721 | 0.09475  | 7.801342 | 7.655915 | 0.001767 | 0.01829  | 7.438131 | 8.162283 | 7.755102 |
| ILMN_2948971 | Slc35b3   | -0.65024 | -0.22854 | -0.27928 | -0.05074 | 10.64166 | 7.654881 | 0.001768 | 0.018291 | 10.93117 | 10.28093 | 10.70263 |
| ILMN_3071907 | Nme2      | -0.74264 | -0.52241 | -1.02386 | -0.50145 | 5.780194 | 7.651854 | 0.001772 | 0.018315 | 6.352423 | 5.609778 | 5.83001  |
| ILMN_1226187 | Lancl1    | -0.49381 | -0.48162 | -0.63646 | -0.15485 | 7.08786  | 7.649371 | 0.001775 | 0.018324 | 7.490832 | 6.997027 | 7.009213 |
| ILMN_2925350 | Aldh3a2   | 0.764588 | 0.752481 | 0.405226 | -0.34725 | 12.1982  | 7.648467 | 0.001776 | 0.018324 | 11.71763 | 12.48222 | 12.47011 |
| ILMN_2849016 | 1300013J1 | 0.969504 | 0.967274 | 0.641921 | -0.32535 | 11.60804 | 7.648237 | 0.001776 | 0.018324 | 10.96337 | 11.93287 | 11.93064 |
| ILMN_1230396 | Zc3hdc6   | -0.54197 | -0.01403 | 0.318995 | 0.333028 | 5.233969 | 7.643561 | 0.001781 | 0.018357 | 5.293221 | 4.751252 | 5.279188 |
| ILMN_2629044 | Ndufa7    | -0.59029 | -0.39543 | -0.58843 | -0.193   | 12.18684 | 7.643459 | 0.001781 | 0.018357 | 12.58037 | 11.99008 | 12.18494 |
| ILMN_2650812 | Gdi3      | 0.286488 | -0.38075 | -0.43685 | -0.05609 | 5.929497 | 7.641892 | 0.001783 | 0.018364 | 6.062274 | 6.348762 | 5.681523 |
| ILMN_2748537 | Mbtps1    | 0.403851 | 0.623442 | 0.564134 | -0.05931 | 6.883117 | 7.639339 | 0.001786 | 0.018383 | 6.48526  | 6.889111 | 7.108702 |
| ILMN_2628021 | 0610031J0 | 0.564963 | 0.561993 | 0.535451 | -0.02654 | 10.21861 | 7.632697 | 0.001793 | 0.018449 | 9.803012 | 10.36798 | 10.365   |
| ILMN_3070469 | Entpd5    | 0.844473 | 0.571637 | -0.0478  | -0.61944 | 6.776753 | 7.629449 | 0.001797 | 0.018475 | 6.434677 | 7.27915  | 7.006313 |
| ILMN_1219703 | Myg1      | -0.39614 | -0.48505 | -0.66253 | -0.17748 | 7.846559 | 7.62843  | 0.001798 | 0.018476 | 8.232488 | 7.836346 | 7.747439 |
| ILMN_1229246 | 2610039E0 | 0.498404 | 0.855396 | 0.62115  | -0.23425 | 6.24478  | 7.620025 | 0.001807 | 0.018563 | 5.751043 | 6.249447 | 6.606439 |
| ILMN_2597248 | Abcb9     | 0.534282 | 0.641324 | 0.552252 | -0.08907 | 7.747509 | 7.618862 | 0.001809 | 0.018565 | 7.315545 | 7.849827 | 7.956869 |
| ILMN_1218814 | 2610111M  | -0.40598 | -0.4539  | -0.63803 | -0.18413 | 6.446485 | 7.61357  | 0.001815 | 0.018616 | 6.820965 | 6.414981 | 6.36706  |
| ILMN_2853658 | Pelo      | 0.517271 | 0.240178 | 0.168879 | -0.0713  | 9.286072 | 7.611033 | 0.001818 | 0.01862  | 9.05449  | 9.571761 | 9.294668 |
| ILMN_3104271 | Abcc9     | -0.16856 | 0.367087 | 0.820983 | 0.453896 | 6.174401 | 7.610442 | 0.001818 | 0.01862  | 5.919524 | 5.750962 | 6.286611 |
| ILMN_1223140 | Eftud1    | 0.705698 | 0.18515  | 0.263976 | 0.078827 | 6.840611 | 7.609662 | 0.001819 | 0.01862  | 6.551905 | 7.257603 | 6.737055 |
| ILMN_2592810 | Map3k3    | 0.488035 | 0.625742 | 0.817043 | 0.191301 | 7.009124 | 7.609058 | 0.00182  | 0.01862  | 6.526419 | 7.014454 | 7.152161 |
| ILMN_2689581 | Pipox     | 0.647859 | 0.240343 | -0.02344 | -0.26378 | 6.704745 | 7.60827  | 0.001821 | 0.01862  | 6.488554 | 7.136414 | 6.728898 |
| ILMN_1244835 | Al790205  | 0.550644 | 0.729828 | 0.529186 | -0.20064 | 8.919126 | 7.607603 | 0.001822 | 0.01862  | 8.466711 | 9.017355 | 9.196539 |
| ILMN_2424299 | Tnfrsf12a | -0.5235  | 0.309146 | -0.2379  | -0.54704 | 8.34562  | 7.606187 | 0.001823 | 0.018624 | 8.458682 | 7.935185 | 8.767828 |
| ILMN_2727920 | Tspo      | -0.34621 | -0.37457 | -0.71154 | -0.33697 | 9.83279  | 7.605395 | 0.001824 | 0.018624 | 10.19087 | 9.844662 | 9.8163   |
| ILMN_2491202 | Vnn3      | -0.83632 | -0.47786 | -0.72453 | -0.24667 | 5.009634 | 7.604309 | 0.001825 | 0.018626 | 5.519313 | 4.682994 | 5.041452 |
| ILMN_3103652 | Csnk1d    | 0.469725 | 0.312651 | 0.537252 | 0.224601 | 7.925315 | 7.603109 | 0.001827 | 0.018629 | 7.595408 | 8.065133 | 7.908059 |
| ILMN_1238871 | Gapvd1    | 0.562267 | 0.221199 | 0.498206 | 0.277006 | 7.362549 | 7.594368 | 0.001837 | 0.018721 | 7.042131 | 7.604398 | 7.263331 |
| ILMN_2680307 | Sec14l1   | 0.749633 | 0.334776 | 0.528169 | 0.193393 | 5.331463 | 7.591565 | 0.00184  | 0.018743 | 4.928318 | 5.677952 | 5.263094 |
| ILMN_2919489 | 1110008F1 | -0.3354  | -0.43114 | -0.79544 | -0.36431 | 9.211519 | 7.589149 | 0.001843 | 0.01876  | 9.602014 | 9.266614 | 9.170877 |
| ILMN_2780177 | Mrps5     | -0.14921 | -0.44381 | -0.58633 | -0.14252 | 7.640256 | 7.586888 | 0.001845 | 0.018767 | 7.935094 | 7.785881 | 7.491286 |
| ILMN_3064134 | Thnsl1    | -0.05119 | -0.58776 | -0.56762 | 0.020139 | 5.474834 | 7.585902 | 0.001847 | 0.018767 | 5.776477 | 5.725285 | 5.188716 |
| ILMN_3160529 | Gtf3c3    | -0.20444 | -0.48956 | -0.4573  | 0.032262 | 7.51487  | 7.585735 | 0.001847 | 0.018767 | 7.802693 | 7.598252 | 7.313136 |
| ILMN_2645090 | St7l      | -0.59925 | -0.38152 | -0.64049 | -0.25897 | 8.724508 | 7.58478  | 0.001848 | 0.018768 | 9.129822 | 8.530574 | 8.748302 |

|              |           |          |          |          |          |          |          |          |          |          |          |          |
|--------------|-----------|----------|----------|----------|----------|----------|----------|----------|----------|----------|----------|----------|
| ILMN_1234589 | Ppa2      | -0.02016 | -0.25499 | -0.67861 | -0.42362 | 7.615423 | 7.582666 | 0.00185  | 0.018774 | 7.853863 | 7.833703 | 7.59887  |
| ILMN_1229091 | Nr1d1     | 1.042345 | -0.1607  | -0.32733 | -0.16662 | 5.994507 | 7.582424 | 0.001851 | 0.018774 | 5.855928 | 6.898273 | 5.695226 |
| ILMN_2701435 | 4930506D2 | -0.66428 | -0.61516 | -0.43454 | 0.180628 | 7.279796 | 7.580535 | 0.001853 | 0.018785 | 7.70829  | 7.044013 | 7.093126 |
| ILMN_2744492 | D10Bwg09  | 0.438723 | 0.90237  | 0.740457 | -0.16191 | 8.577711 | 7.578455 | 0.001855 | 0.018799 | 8.057324 | 8.496047 | 8.959694 |
| ILMN_2985447 | Cmtm7     | -0.46713 | -0.37251 | -0.53993 | -0.16743 | 4.886443 | 7.573509 | 0.001861 | 0.018839 | 5.231335 | 4.764204 | 4.858828 |
| ILMN_2769733 | D8ErtD325 | 0.439484 | 0.339214 | 0.582907 | 0.243693 | 10.75461 | 7.57324  | 0.001861 | 0.018839 | 10.41421 | 10.85369 | 10.75342 |
| ILMN_3139405 | Hbs1l     | 0.577112 | 0.339615 | 0.331542 | -0.00807 | 8.556595 | 7.572236 | 0.001863 | 0.01884  | 8.244528 | 8.82164  | 8.584143 |
| ILMN_2670542 | Asl       | 0.356858 | -0.26072 | -0.38439 | -0.12367 | 6.726413 | 7.571165 | 0.001864 | 0.018841 | 6.798474 | 7.155332 | 6.537757 |
| ILMN_2611284 | Dgcr6     | -0.71494 | -0.20438 | -0.14199 | 0.06239  | 9.903691 | 7.569943 | 0.001865 | 0.018845 | 10.16902 | 9.454074 | 9.964641 |
| ILMN_2947369 | Ppp2r3c   | -0.42513 | -0.57914 | -0.72199 | -0.14285 | 7.289862 | 7.565092 | 0.001871 | 0.018885 | 7.721428 | 7.296297 | 7.142287 |
| ILMN_1217454 | Lamp2     | -0.66607 | -0.12766 | 0.126603 | 0.254261 | 10.75665 | 7.564717 | 0.001871 | 0.018885 | 10.92343 | 10.25736 | 10.79577 |
| ILMN_2643092 | 3010033PC | -0.45947 | -0.39065 | -0.51644 | -0.12579 | 13.24839 | 7.558702 | 0.001878 | 0.018932 | 13.59003 | 13.13055 | 13.19937 |
| ILMN_2621596 | Psme2b    | -0.79646 | -0.54531 | -0.89086 | -0.34555 | 7.892526 | 7.558061 | 0.001879 | 0.018932 | 8.450683 | 7.654223 | 7.905373 |
| ILMN_2717777 | Polrmt    | 0.604778 | 0.379533 | 0.591436 | 0.211903 | 9.503734 | 7.55804  | 0.001879 | 0.018932 | 9.109797 | 9.714575 | 9.48933  |
| ILMN_2596499 | BC058638  | 0.622066 | 0.654488 | 0.913502 | 0.259014 | 5.764883 | 7.55053  | 0.001888 | 0.01901  | 5.217369 | 5.839435 | 5.871857 |
| ILMN_2640140 | 1810037GC | -0.66033 | -0.29418 | -0.63735 | -0.34317 | 7.980727 | 7.548238 | 0.001891 | 0.019027 | 8.378693 | 7.718358 | 8.084514 |
| ILMN_2588601 | Ndufa2    | -0.48011 | -0.32336 | -0.40639 | -0.08304 | 12.49408 | 7.545391 | 0.001894 | 0.01905  | 12.79654 | 12.31643 | 12.47318 |
| ILMN_2440530 | Vat1      | 0.636576 | 0.590555 | 0.635156 | 0.044601 | 9.821156 | 7.540849 | 0.0019   | 0.019094 | 9.355584 | 9.99216  | 9.946139 |
| ILMN_2613118 | Rfc4      | -0.73624 | -0.65356 | -0.73313 | -0.07956 | 7.095474 | 7.529923 | 0.001913 | 0.019215 | 7.626208 | 6.889964 | 6.972644 |
| ILMN_2427869 | 5133400GC | -0.83944 | -0.51264 | -0.57142 | -0.05878 | 7.09565  | 7.528684 | 0.001914 | 0.019219 | 7.576526 | 6.737089 | 7.063881 |
| ILMN_2815626 | Palm      | -0.26063 | 0.457797 | 0.534491 | 0.076694 | 6.850904 | 7.522608 | 0.001922 | 0.019279 | 6.667991 | 6.407357 | 7.125788 |
| ILMN_2420368 | Narg1     | 0.298312 | 0.198129 | 0.776067 | 0.577938 | 5.300815 | 7.521925 | 0.001923 | 0.019279 | 4.982689 | 5.281    | 5.180817 |
| ILMN_2624749 | Ankrd10   | -0.80568 | -0.56624 | -0.42528 | 0.140965 | 5.756792 | 7.519775 | 0.001925 | 0.019284 | 6.206093 | 5.400408 | 5.639851 |
| ILMN_1224907 | Fbxw5     | 0.412876 | 0.297029 | 0.526104 | 0.229076 | 9.886264 | 7.519623 | 0.001925 | 0.019284 | 9.577262 | 9.990138 | 9.87429  |
| ILMN_2937548 | Hist1h4m  | -0.80207 | -0.52388 | -0.59204 | -0.06816 | 5.924737 | 7.509967 | 0.001937 | 0.019391 | 6.404234 | 5.602168 | 5.880353 |
| ILMN_2759954 | Ppp1r2    | -0.60594 | -0.27765 | -0.18192 | 0.095725 | 10.18805 | 7.50443  | 0.001944 | 0.019448 | 10.45442 | 9.84848  | 10.17678 |
| ILMN_3008406 | Odc1      | -0.73819 | -0.62961 | -0.35456 | 0.275051 | 11.6385  | 7.502026 | 0.001947 | 0.019467 | 12.06909 | 11.33089 | 11.43947 |
| ILMN_2822579 | Col4a2    | 0.737245 | 1.003347 | 1.155854 | 0.152506 | 7.913391 | 7.499966 | 0.001949 | 0.019481 | 7.18928  | 7.926525 | 8.192627 |
| ILMN_1217879 | Erh       | -0.67718 | -0.40163 | -0.3992  | 0.002428 | 10.44096 | 7.497121 | 0.001953 | 0.019505 | 10.81046 | 10.13329 | 10.40883 |
| ILMN_2843029 | Man1a2    | 0.980394 | 0.629697 | 0.190615 | -0.43908 | 6.765221 | 7.493789 | 0.001957 | 0.019535 | 6.315044 | 7.295438 | 6.944741 |
| ILMN_2665490 | Litaf     | 0.347901 | 0.589842 | 0.503665 | -0.08618 | 12.49953 | 7.490319 | 0.001961 | 0.019566 | 12.13917 | 12.48708 | 12.72902 |
| ILMN_2917497 | Fcgrt     | 0.355168 | 0.598371 | 0.47444  | -0.12393 | 10.8141  | 7.486867 | 0.001966 | 0.019598 | 10.4571  | 10.81227 | 11.05547 |
| ILMN_1245987 | Hnrpk     | 0.897222 | 0.088343 | 0.132566 | 0.044223 | 8.832351 | 7.479881 | 0.001974 | 0.019653 | 8.552819 | 9.450041 | 8.641161 |
| ILMN_2790246 | Herpud1   | 0.416367 | -0.16117 | -0.34684 | -0.18567 | 11.51463 | 7.478577 | 0.001976 | 0.019653 | 11.53754 | 11.95391 | 11.37638 |
| ILMN_3096012 | Ssbp1     | -0.62322 | -0.35757 | -0.71522 | -0.35765 | 8.819675 | 7.478421 | 0.001976 | 0.019653 | 9.243678 | 8.62046  | 8.886105 |

|              |            |          |          |          |          |          |          |          |          |          |          |          |
|--------------|------------|----------|----------|----------|----------|----------|----------|----------|----------|----------|----------|----------|
| ILMN_2705128 | Muted      | -0.49736 | -0.31481 | -0.33349 | -0.01868 | 9.910944 | 7.477967 | 0.001977 | 0.019653 | 10.19736 | 9.699998 | 9.882547 |
| ILMN_2670727 | Gtf3a      | -0.59275 | -0.26088 | -0.74605 | -0.48516 | 8.424649 | 7.477614 | 0.001977 | 0.019653 | 8.82457  | 8.231817 | 8.563687 |
| ILMN_1230072 | Armc8      | 0.157487 | -0.33407 | -0.52061 | -0.18654 | 6.458252 | 7.47705  | 0.001978 | 0.019653 | 6.632552 | 6.790038 | 6.29848  |
| ILMN_2717374 | Pcmt1      | -0.39435 | -0.63357 | -0.80128 | -0.16771 | 7.441677 | 7.476009 | 0.001979 | 0.019654 | 7.898975 | 7.504627 | 7.265407 |
| ILMN_2899022 | A930025D   | 0.447557 | 0.843625 | 0.8177   | -0.02593 | 5.628067 | 7.474731 | 0.001981 | 0.019659 | 5.100847 | 5.548404 | 5.944472 |
| ILMN_2804166 | Igsf9      | 0.759916 | 0.878567 | 1.24053  | 0.361963 | 11.39108 | 7.470772 | 0.001986 | 0.019687 | 10.67132 | 11.43124 | 11.54989 |
| ILMN_1220521 | S100a16    | -0.71753 | -0.72591 | -0.77436 | -0.04845 | 6.664878 | 7.470691 | 0.001986 | 0.019687 | 7.219328 | 6.501793 | 6.493419 |
| ILMN_2603699 | Birc5      | -0.39895 | -0.38134 | -0.83787 | -0.45654 | 8.71586  | 7.464495 | 0.001994 | 0.019753 | 9.120401 | 8.721448 | 8.739063 |
| ILMN_2614825 | Farsb      | 0.600271 | 0.011122 | -0.11645 | -0.12757 | 10.13681 | 7.460567 | 0.001999 | 0.019791 | 10.01308 | 10.61335 | 10.0242  |
| ILMN_1257332 | Mkks       | -0.46784 | -0.435   | -0.66693 | -0.23193 | 10.09154 | 7.455468 | 0.002005 | 0.019833 | 10.48399 | 10.01615 | 10.04898 |
| ILMN_2956092 | Rassf4     | 1.010992 | 0.757789 | 1.147326 | 0.389537 | 6.831623 | 7.454669 | 0.002006 | 0.019833 | 6.102596 | 7.113588 | 6.860385 |
| ILMN_1250709 | 1810046J1  | -0.59071 | -0.30327 | -0.45033 | -0.14706 | 12.73644 | 7.453415 | 0.002008 | 0.019833 | 13.07251 | 12.4818  | 12.76925 |
| ILMN_1234766 | 2700017M   | 1.308072 | 0.527935 | 0.466558 | -0.06138 | 10.1758  | 7.452774 | 0.002009 | 0.019833 | 9.600154 | 10.90823 | 10.12809 |
| ILMN_2972645 | Pdzd11     | -0.32893 | -0.46244 | -0.67116 | -0.20872 | 9.169878 | 7.452771 | 0.002009 | 0.019833 | 9.535511 | 9.206577 | 9.07307  |
| ILMN_2734712 | Ptpla      | -0.61473 | -0.64623 | -0.83431 | -0.18808 | 10.3351  | 7.44786  | 0.002015 | 0.019877 | 10.85892 | 10.24419 | 10.21269 |
| ILMN_2615709 | Spc24      | -0.48405 | -0.32366 | -0.89208 | -0.56842 | 6.941777 | 7.44747  | 0.002015 | 0.019877 | 7.366724 | 6.882673 | 7.043066 |
| ILMN_2958207 | Nsdhl      | -0.7467  | -0.62731 | -0.71351 | -0.0862  | 5.289812 | 7.445164 | 0.002018 | 0.01989  | 5.81169  | 5.064989 | 5.184383 |
| ILMN_2946901 | Slc25a38   | -0.784   | -0.55922 | -0.58186 | -0.02264 | 7.269277 | 7.444213 | 0.00202  | 0.01989  | 7.750545 | 6.966544 | 7.19133  |
| ILMN_2592093 | Ift20      | -0.82073 | -0.60087 | -0.72034 | -0.11947 | 10.28382 | 7.443775 | 0.00202  | 0.01989  | 10.81931 | 9.998579 | 10.21843 |
| ILMN_2737777 | Pias1      | 0.308467 | 0.372832 | 0.581975 | 0.209143 | 8.077329 | 7.440655 | 0.002024 | 0.019914 | 7.76151  | 8.069977 | 8.134342 |
| ILMN_2934941 | Abcc6      | 0.872111 | 1.245948 | 0.903234 | -0.34271 | 6.601457 | 7.43984  | 0.002025 | 0.019914 | 5.846134 | 6.718244 | 7.092081 |
| ILMN_1237507 | Dlst       | 0.161539 | -0.43182 | 0.00931  | 0.441128 | 10.84299 | 7.438427 | 0.002027 | 0.019914 | 10.90823 | 11.06977 | 10.47641 |
| ILMN_1254231 | Uck1       | -0.29864 | -0.29518 | -0.66258 | -0.3674  | 7.123336 | 7.437778 | 0.002028 | 0.019914 | 7.437434 | 7.138798 | 7.142257 |
| ILMN_2699531 | Rgs10      | -0.93968 | -0.49489 | -0.24265 | 0.252234 | 8.358319 | 7.436644 | 0.002029 | 0.019914 | 8.777624 | 7.837947 | 8.282735 |
| ILMN_2605423 | D7Ertd462i | 0.529664 | 0.038595 | 0.407883 | 0.369288 | 4.938301 | 7.436511 | 0.002029 | 0.019914 | 4.694265 | 5.223929 | 4.73286  |
| ILMN_2977210 | AW060207   | -0.55367 | -0.30283 | -0.45295 | -0.15013 | 7.303486 | 7.435567 | 0.002031 | 0.019915 | 7.630848 | 7.077179 | 7.328022 |
| ILMN_2711112 | Shcbp1     | 0.138102 | -0.11265 | -0.52831 | -0.41566 | 5.799692 | 7.431817 | 0.002035 | 0.019922 | 5.925405 | 6.063507 | 5.812756 |
| ILMN_1256671 | Hnrph1     | 0.510721 | -0.10133 | -0.14639 | -0.04506 | 7.970148 | 7.431701 | 0.002036 | 0.019922 | 7.904399 | 8.41512  | 7.803069 |
| ILMN_2865939 | Ccdc100    | 0.565834 | 0.494206 | 0.676789 | 0.182584 | 8.702305 | 7.431644 | 0.002036 | 0.019922 | 8.268098 | 8.833932 | 8.762304 |
| ILMN_1221274 | Rab32      | -0.58166 | -0.32837 | -0.35538 | -0.02701 | 8.810333 | 7.430225 | 0.002038 | 0.019922 | 9.126683 | 8.545026 | 8.798316 |
| ILMN_1246034 | 2810055E0  | -0.34166 | -0.51689 | -0.55106 | -0.03417 | 7.177228 | 7.429874 | 0.002038 | 0.019922 | 7.529629 | 7.187972 | 7.012739 |
| ILMN_2654754 | Gp38       | -0.90802 | -0.45602 | -0.37011 | 0.085909 | 8.748152 | 7.429705 | 0.002038 | 0.019922 | 9.18169  | 8.273675 | 8.725668 |
| ILMN_1218424 | Ppp2r2d    | -0.72608 | -0.50725 | -0.5701  | -0.06286 | 8.849824 | 7.423392 | 0.002046 | 0.019988 | 9.300681 | 8.574601 | 8.793436 |
| ILMN_2601865 | Mrpl52     | -0.75546 | -0.66761 | -0.5336  | 0.134008 | 8.78653  | 7.422787 | 0.002047 | 0.019988 | 9.275699 | 8.52024  | 8.608087 |
| ILMN_1239055 | Xdh        | 1.014531 | 0.932335 | 0.83665  | -0.09568 | 10.97949 | 7.415065 | 0.002057 | 0.020075 | 10.28361 | 11.29814 | 11.21594 |

|              |           |          |          |          |          |          |          |          |          |          |          |          |
|--------------|-----------|----------|----------|----------|----------|----------|----------|----------|----------|----------|----------|----------|
| ILMN_2675514 | Rpp38     | -0.55468 | -0.88556 | -0.65461 | 0.230947 | 6.50966  | 7.409474 | 0.002065 | 0.020135 | 7.033373 | 6.478695 | 6.147813 |
| ILMN_2950343 | Rasef     | -0.66344 | -0.61347 | -0.61167 | 0.001802 | 5.924859 | 7.40398  | 0.002072 | 0.020194 | 6.397003 | 5.733559 | 5.783535 |
| ILMN_2683856 | Noxo1     | -0.74921 | -0.56911 | -0.57241 | -0.0033  | 9.643624 | 7.400386 | 0.002077 | 0.020211 | 10.11631 | 9.367094 | 9.547199 |
| ILMN_2778555 | LOC192758 | 0.459671 | 0.7351   | 0.015006 | -0.72009 | 5.933095 | 7.400196 | 0.002077 | 0.020211 | 5.630651 | 6.090321 | 6.36575  |
| ILMN_2700715 | Cstb      | -0.42476 | -0.28466 | -0.4457  | -0.16103 | 12.55065 | 7.400027 | 0.002077 | 0.020211 | 12.83943 | 12.41467 | 12.55477 |
| ILMN_3048503 | Nipbl     | 0.730803 | 0.600568 | 0.615097 | 0.014529 | 8.199167 | 7.39836  | 0.002079 | 0.020218 | 7.71255  | 8.443354 | 8.313118 |
| ILMN_2716336 | Ap1g2     | 0.674579 | -0.12106 | 0.187572 | 0.308634 | 5.05286  | 7.397736 | 0.00208  | 0.020218 | 4.867588 | 5.542167 | 4.746526 |
| ILMN_1240264 | Usp2      | 1.154386 | 0.470394 | 0.551076 | 0.080682 | 9.612192 | 7.396415 | 0.002082 | 0.020224 | 9.068229 | 10.22261 | 9.538622 |
| ILMN_2595593 | Fxyd3     | -0.65972 | -0.70699 | -0.86608 | -0.15909 | 9.547499 | 7.394862 | 0.002084 | 0.020233 | 10.1057  | 9.445975 | 9.398705 |
| ILMN_3040816 | D14Ert58  | -0.63073 | -0.81333 | -0.64565 | 0.167679 | 5.537549 | 7.393245 | 0.002086 | 0.020234 | 6.059978 | 5.429251 | 5.246645 |
| ILMN_2747103 | Tbca      | -0.49907 | -0.28382 | -0.36332 | -0.0795  | 12.83923 | 7.392969 | 0.002086 | 0.020234 | 13.12578 | 12.62671 | 12.84196 |
| ILMN_2758632 | Mnat1     | -0.53547 | -0.46363 | -0.55509 | -0.09147 | 7.483009 | 7.392064 | 0.002088 | 0.020235 | 7.871557 | 7.336089 | 7.407929 |
| ILMN_2685873 | AA959934  | -0.55872 | -0.39311 | -0.82488 | -0.43178 | 5.51652  | 7.389565 | 0.002091 | 0.020256 | 5.960698 | 5.401974 | 5.567591 |
| ILMN_1224093 | Llgh2     | 0.511505 | 0.40995  | 0.64021  | 0.23026  | 10.92331 | 7.384156 | 0.002098 | 0.020314 | 10.53289 | 11.0444  | 10.94284 |
| ILMN_1240857 | Cox7a1    | -0.64541 | -0.3479  | -0.60752 | -0.25962 | 13.18416 | 7.377104 | 0.002108 | 0.020395 | 13.58436 | 12.93895 | 13.23646 |
| ILMN_2739698 | Rab28     | -0.2453  | 0.026048 | 0.341358 | 0.31531  | 10.86319 | 7.371765 | 0.002115 | 0.020453 | 10.83266 | 10.58736 | 10.85871 |
| ILMN_3011719 | 6430706D2 | 0.452862 | 0.490319 | 0.609846 | 0.119528 | 10.27489 | 7.367489 | 0.002121 | 0.020497 | 9.886634 | 10.3395  | 10.37695 |
| ILMN_2706451 | 2810413I2 | -0.77037 | -0.23996 | -0.2071  | 0.032867 | 7.789113 | 7.365867 | 0.002123 | 0.020507 | 8.093472 | 7.323098 | 7.853508 |
| ILMN_2723920 | Itpk1     | 0.354463 | 0.436671 | 0.756385 | 0.319713 | 12.00432 | 7.36339  | 0.002126 | 0.020528 | 11.61744 | 11.9719  | 12.05411 |
| ILMN_2612635 | Snrpd2    | -0.74045 | -0.37583 | -0.51006 | -0.13423 | 11.78675 | 7.36168  | 0.002129 | 0.020539 | 12.19334 | 11.45289 | 11.81751 |
| ILMN_2693922 | Egfr      | -0.72177 | -0.06484 | 0.198156 | 0.262997 | 7.692915 | 7.353293 | 0.00214  | 0.020636 | 7.840028 | 7.11826  | 7.775187 |
| ILMN_1246725 | Mrps6     | -0.75394 | -0.45252 | -0.836   | -0.38348 | 8.869173 | 7.35257  | 0.002141 | 0.020636 | 9.37979  | 8.625851 | 8.927266 |
| ILMN_2687156 | Galm      | 0.701245 | 0.436554 | 0.359113 | -0.07744 | 11.29795 | 7.348533 | 0.002146 | 0.020678 | 10.92372 | 11.62496 | 11.36027 |
| ILMN_2786860 | Arl3      | -0.74964 | -0.37246 | -0.23933 | 0.13313  | 7.481488 | 7.344386 | 0.002152 | 0.020722 | 7.821846 | 7.072211 | 7.449382 |
| ILMN_3065816 | Eif4e2    | -0.17116 | -0.34581 | -0.70318 | -0.35737 | 7.161847 | 7.341396 | 0.002156 | 0.020744 | 7.466883 | 7.295725 | 7.121076 |
| ILMN_2463447 | Trappc3   | -0.54492 | -0.61588 | -0.67944 | -0.06355 | 7.068493 | 7.34099  | 0.002157 | 0.020744 | 7.528554 | 6.983634 | 6.91267  |
| ILMN_2701271 | Plscr1    | 0.543726 | 0.393987 | -0.54985 | -0.94384 | 10.34476 | 7.339183 | 0.002159 | 0.020756 | 10.24779 | 10.79152 | 10.64178 |
| ILMN_3112011 | Dusp16    | 0.520631 | 0.274955 | 0.577804 | 0.302849 | 9.702039 | 7.337077 | 0.002162 | 0.020773 | 9.358691 | 9.879322 | 9.633646 |
| ILMN_2596611 | Clic1     | -0.89158 | -0.62686 | -0.58904 | 0.037815 | 8.972354 | 7.330852 | 0.002171 | 0.020844 | 9.499223 | 8.607645 | 8.872367 |
| ILMN_3155342 | 1810048PC | 0.97149  | 0.840113 | 0.514017 | -0.3261  | 7.601978 | 7.329452 | 0.002173 | 0.020851 | 7.020573 | 7.992062 | 7.860686 |
| ILMN_2729197 | Hic1      | 0.725675 | 0.718582 | 0.894316 | 0.175735 | 6.372739 | 7.326562 | 0.002177 | 0.020877 | 5.788096 | 6.513771 | 6.506677 |
| ILMN_2726371 | Nqo1      | 0.161861 | -0.35221 | -1.00028 | -0.64807 | 8.134216 | 7.325828 | 0.002178 | 0.020877 | 8.431872 | 8.593733 | 8.079664 |
| ILMN_3161906 | LOC432879 | -1.08681 | -0.64793 | -0.69875 | -0.05083 | 5.682731 | 7.322519 | 0.002182 | 0.020899 | 6.291104 | 5.204296 | 5.643176 |
| ILMN_1245500 | Nupl1     | -0.28017 | -0.61396 | -0.65086 | -0.0369  | 5.231154 | 7.321895 | 0.002183 | 0.020899 | 5.617404 | 5.337229 | 5.003442 |
| ILMN_2640122 | Pmpcb     | -0.72532 | -0.85594 | -0.45094 | 0.404999 | 5.57842  | 7.32163  | 0.002184 | 0.020899 | 6.086468 | 5.361147 | 5.230532 |

|              |           |          |          |          |          |          |          |          |          |          |          |          |
|--------------|-----------|----------|----------|----------|----------|----------|----------|----------|----------|----------|----------|----------|
| ILMN_2596596 | Rgs1      | -0.57155 | -0.32714 | -1.11213 | -0.78499 | 6.174854 | 7.319844 | 0.002186 | 0.020911 | 6.677559 | 6.106007 | 6.35042  |
| ILMN_2757838 | 1810043M  | -0.1455  | -0.45895 | -0.50203 | -0.04308 | 8.070249 | 7.317566 | 0.002189 | 0.02093  | 8.34687  | 8.201366 | 7.887922 |
| ILMN_2734283 | B430110G  | 0.462584 | 0.691286 | 0.739858 | 0.048572 | 8.506679 | 7.313785 | 0.002195 | 0.020969 | 8.033247 | 8.495831 | 8.724532 |
| ILMN_1230413 | Rab11a    | -0.73453 | -0.79411 | -0.61608 | 0.178028 | 6.034356 | 7.31205  | 0.002197 | 0.020981 | 6.570537 | 5.836011 | 5.776424 |
| ILMN_2676217 | Barx2     | -0.78426 | -0.87817 | -0.40131 | 0.476858 | 5.143162 | 7.299843 | 0.002214 | 0.021124 | 5.659096 | 4.874839 | 4.780928 |
| ILMN_2717678 | Ly64      | 0.529164 | 0.388914 | 0.625946 | 0.237032 | 13.41398 | 7.299772 | 0.002215 | 0.021124 | 13.02797 | 13.55714 | 13.41689 |
| ILMN_2604243 | Itgb6     | -0.62757 | -0.55042 | -0.0933  | 0.457124 | 4.991598 | 7.291949 | 0.002226 | 0.021218 | 5.30942  | 4.681852 | 4.758997 |
| ILMN_2733482 | Gca       | 0.197213 | -0.44864 | -0.51393 | -0.06528 | 6.08703  | 7.286693 | 0.002233 | 0.021278 | 6.27837  | 6.475583 | 5.829726 |
| ILMN_2714638 | Mertk     | 1.118737 | 0.966771 | 0.829227 | -0.13754 | 9.744773 | 7.284821 | 0.002236 | 0.021292 | 9.016089 | 10.13483 | 9.982861 |
| ILMN_2719473 | Asf1b     | 0.029933 | -0.4404  | -0.62725 | -0.18685 | 6.2858   | 7.283487 | 0.002238 | 0.021298 | 6.545227 | 6.57516  | 6.104831 |
| ILMN_1231971 | 9830124H  | -0.66222 | -0.21738 | -0.24724 | -0.02986 | 7.364635 | 7.282728 | 0.002239 | 0.021298 | 7.646345 | 6.98412  | 7.428966 |
| ILMN_2958894 | D6Wsu163  | -0.42879 | -0.71607 | -0.51892 | 0.19715  | 7.452273 | 7.273602 | 0.002252 | 0.021411 | 7.86822  | 7.43943  | 7.152146 |
| ILMN_2836982 | Des       | -0.02074 | 0.772989 | 1.214316 | 0.441327 | 11.01385 | 7.2694   | 0.002258 | 0.021451 | 10.52221 | 10.50147 | 11.2952  |
| ILMN_2691832 | A530082C1 | 0.657239 | 0.534866 | 0.807022 | 0.272156 | 6.502245 | 7.26901  | 0.002259 | 0.021451 | 6.002464 | 6.659703 | 6.53733  |
| ILMN_1237049 | 5330431N1 | -0.5923  | -0.34517 | -0.39093 | -0.04576 | 9.123093 | 7.267026 | 0.002262 | 0.021463 | 9.455195 | 8.862891 | 9.110023 |
| ILMN_1222009 | Gab1      | 0.632067 | 0.558586 | 0.561112 | 0.002527 | 9.062226 | 7.266457 | 0.002262 | 0.021463 | 8.624285 | 9.256351 | 9.18287  |
| ILMN_2711734 | Ndufs8    | -0.46167 | -0.34094 | -0.49704 | -0.15611 | 12.1257  | 7.265535 | 0.002264 | 0.021464 | 12.45061 | 11.98894 | 12.10967 |
| ILMN_1254793 | Sart1     | 0.671366 | 0.414257 | 0.708467 | 0.29421  | 7.223445 | 7.261531 | 0.00227  | 0.021508 | 6.774923 | 7.446289 | 7.18918  |
| ILMN_1223378 | Ubap2l    | 0.602486 | 0.153227 | 0.213884 | 0.060657 | 7.11396  | 7.259457 | 0.002273 | 0.021516 | 6.871561 | 7.474046 | 7.024788 |
| ILMN_3111877 | Rbms2     | 0.609703 | 0.565541 | 1.009383 | 0.443842 | 9.141621 | 7.25926  | 0.002273 | 0.021516 | 8.595464 | 9.205167 | 9.161005 |
| ILMN_2945073 | Nat5      | -1.04355 | -0.76622 | -0.91897 | -0.15276 | 7.171652 | 7.258371 | 0.002274 | 0.021516 | 7.853837 | 6.810288 | 7.08762  |
| ILMN_2619707 | Slco2b1   | 0.615354 | 0.365823 | 0.450461 | 0.084638 | 10.07039 | 7.256238 | 0.002277 | 0.021534 | 9.712478 | 10.32783 | 10.0783  |
| ILMN_1229056 | D6Wsu176  | 0.498859 | 0.525814 | 0.542996 | 0.017182 | 10.72375 | 7.254064 | 0.002281 | 0.021553 | 10.33183 | 10.83069 | 10.85765 |
| ILMN_1255556 | Pink1     | 0.323523 | 0.5632   | 0.641929 | 0.078729 | 9.481419 | 7.252894 | 0.002282 | 0.021557 | 9.099256 | 9.422779 | 9.662456 |
| ILMN_2731792 | Lancl1    | -0.36065 | -0.52997 | -0.73741 | -0.20744 | 7.072923 | 7.251066 | 0.002285 | 0.021566 | 7.479932 | 7.119277 | 6.949962 |
| ILMN_2668261 | Slc26a6   | 0.530005 | 0.649168 | 0.639966 | -0.0092  | 11.46806 | 7.250568 | 0.002286 | 0.021566 | 11.01327 | 11.54328 | 11.66244 |
| ILMN_1242248 | Cldn12    | -0.62287 | -0.56213 | -0.43064 | 0.131495 | 8.490297 | 7.248767 | 0.002288 | 0.021576 | 8.894206 | 8.271335 | 8.332075 |
| ILMN_2837543 | Nras      | 0.453052 | 0.39936  | 0.589907 | 0.190547 | 9.822823 | 7.248143 | 0.002289 | 0.021576 | 9.462244 | 9.915296 | 9.861603 |
| ILMN_2667994 | Dnase1l3  | 0.703869 | 0.599185 | 0.805845 | 0.20666  | 7.525185 | 7.242595 | 0.002297 | 0.021642 | 6.99796  | 7.701829 | 7.597145 |
| ILMN_2842605 | Mical1    | 0.373089 | 0.633314 | 0.763768 | 0.130454 | 8.90677  | 7.237728 | 0.002305 | 0.021698 | 8.464227 | 8.837316 | 9.097541 |
| ILMN_2933399 | Ppp1r10   | 0.55626  | 0.241575 | 0.192227 | -0.04935 | 8.843609 | 7.235008 | 0.002309 | 0.0217   | 8.596094 | 9.152354 | 8.837669 |
| ILMN_1244296 | Cdc14b    | 0.925996 | 0.684786 | 0.623771 | -0.06101 | 5.677933 | 7.234676 | 0.002309 | 0.0217   | 5.119294 | 6.04529  | 5.80408  |
| ILMN_2612369 | Prpf8     | 0.518928 | 0.335017 | 0.604903 | 0.269885 | 7.966762 | 7.234219 | 0.00231  | 0.0217   | 7.60205  | 8.120978 | 7.937068 |
| ILMN_2610744 | Myl4      | -0.80519 | -0.35537 | -0.33198 | 0.023387 | 6.507947 | 7.23421  | 0.00231  | 0.0217   | 6.881081 | 6.075895 | 6.525713 |
| ILMN_1238289 | Prkx      | -0.05722 | 0.456293 | 0.543277 | 0.086984 | 8.169929 | 7.233324 | 0.002311 | 0.021701 | 7.934342 | 7.877121 | 8.390635 |

|              |           |          |          |          |          |          |          |          |          |          |          |          |
|--------------|-----------|----------|----------|----------|----------|----------|----------|----------|----------|----------|----------|----------|
| ILMN_2936476 | Pycard    | -0.7465  | -0.61494 | -0.70923 | -0.09429 | 8.83655  | 7.23132  | 0.002314 | 0.021717 | 9.354217 | 8.60772  | 8.739277 |
| ILMN_2705139 | 4921528GC | -0.73208 | -0.46012 | -0.4424  | 0.017722 | 7.873943 | 7.229778 | 0.002317 | 0.021727 | 8.282596 | 7.550511 | 7.822472 |
| ILMN_2850792 | Loh11cr2a | -0.85684 | -0.62553 | -0.44905 | 0.17648  | 7.463006 | 7.226967 | 0.002321 | 0.021755 | 7.945859 | 7.089022 | 7.320331 |
| ILMN_1253813 | Hemp1     | 0.876702 | 0.735752 | 0.819824 | 0.084072 | 7.085573 | 7.220432 | 0.002331 | 0.021835 | 6.477503 | 7.354205 | 7.213255 |
| ILMN_1259754 | Rnf4      | 0.193621 | -0.07233 | -0.34543 | -0.2731  | 7.415509 | 7.218461 | 0.002333 | 0.021851 | 7.471545 | 7.665165 | 7.399212 |
| ILMN_1234694 | Zfp277    | -0.7211  | -0.61436 | -0.45652 | 0.157842 | 5.904355 | 7.21669  | 0.002336 | 0.021864 | 6.352348 | 5.631253 | 5.737989 |
| ILMN_3143748 | Mier1     | -0.66717 | -0.36836 | -0.5631  | -0.19475 | 8.78232  | 7.212868 | 0.002342 | 0.021899 | 9.181976 | 8.514811 | 8.813619 |
| ILMN_2720429 | Pla2g6    | 0.738312 | 0.598507 | 0.473483 | -0.12502 | 5.07917  | 7.212544 | 0.002342 | 0.021899 | 4.626595 | 5.364907 | 5.225101 |
| ILMN_2723058 | Plod3     | 0.519336 | 0.512949 | 0.677072 | 0.164122 | 9.278015 | 7.205805 | 0.002353 | 0.021983 | 8.850676 | 9.370012 | 9.363625 |
| ILMN_1256157 | 2200002KC | -1.03294 | -0.80385 | -0.61036 | 0.193499 | 5.910143 | 7.202901 | 0.002357 | 0.022012 | 6.521931 | 5.488989 | 5.718077 |
| ILMN_2942011 | Robo4     | 0.708679 | 0.801733 | 1.003369 | 0.201636 | 7.946939 | 7.201702 | 0.002359 | 0.022018 | 7.318494 | 8.027173 | 8.120227 |
| ILMN_2496121 | 2600001B1 | 0.884469 | 0.586664 | 0.452185 | -0.13448 | 6.341215 | 7.198631 | 0.002364 | 0.02205  | 5.860385 | 6.744855 | 6.447049 |
| ILMN_2781966 | Bud31     | -0.36807 | -0.4144  | -0.60751 | -0.1931  | 10.26844 | 7.195814 | 0.002368 | 0.022078 | 10.61593 | 10.24786 | 10.20153 |
| ILMN_2636832 | Cyb5r3    | 0.9309   | 0.24674  | 0.050417 | -0.19632 | 8.491496 | 7.194115 | 0.00237  | 0.022086 | 8.184481 | 9.115381 | 8.431221 |
| ILMN_1245918 | Map3k7ip1 | 0.509671 | 0.299599 | 0.594708 | 0.29511  | 9.724326 | 7.192967 | 0.002372 | 0.022086 | 9.373331 | 9.883002 | 9.67293  |
| ILMN_1235372 | Hbb-b1    | -1.30271 | -0.8804  | -0.75961 | 0.12079  | 5.477399 | 7.192788 | 0.002372 | 0.022086 | 6.213079 | 4.910365 | 5.332681 |
| ILMN_1240257 | Galnt2    | 0.428376 | 0.508846 | 0.451948 | -0.0569  | 9.886964 | 7.191135 | 0.002375 | 0.022089 | 9.539672 | 9.968047 | 10.04852 |
| ILMN_1221736 | Samhd1    | 0.950731 | 0.791143 | 0.720923 | -0.07022 | 8.72135  | 7.190916 | 0.002375 | 0.022089 | 8.105651 | 9.056382 | 8.896794 |
| ILMN_1254840 | Smarbcb1  | 0.31943  | -0.15014 | -0.21135 | -0.0612  | 7.990395 | 7.189178 | 0.002378 | 0.022102 | 8.000909 | 8.320339 | 7.850769 |
| ILMN_2724322 | Tex292    | 0.346797 | -0.17297 | -0.25862 | -0.08564 | 7.937925 | 7.184608 | 0.002385 | 0.022142 | 7.959123 | 8.305921 | 7.786149 |
| ILMN_2612513 | 6330569M  | 0.570299 | 0.386332 | 0.501539 | 0.115207 | 10.05805 | 7.184572 | 0.002385 | 0.022142 | 9.693508 | 10.26381 | 10.07984 |
| ILMN_2667091 | Ppp1r3c   | -0.74784 | 0.253262 | 0.260781 | 0.007519 | 8.147476 | 7.183925 | 0.002386 | 0.022142 | 8.205926 | 7.458084 | 8.459187 |
| ILMN_1214593 | Fahd2a    | -0.16284 | -0.27653 | -0.75948 | -0.48295 | 5.80359  | 7.181575 | 0.00239  | 0.02216  | 6.103303 | 5.940463 | 5.826771 |
| ILMN_2707207 | 1110011D1 | -0.6799  | 0.738575 | 0.535133 | -0.20344 | 6.349432 | 7.180965 | 0.002391 | 0.02216  | 6.200979 | 5.521083 | 6.939554 |
| ILMN_2629982 | 3110052NC | -0.07211 | -0.40149 | -0.70041 | -0.29892 | 7.215892 | 7.178035 | 0.002395 | 0.022191 | 7.509395 | 7.437288 | 7.107903 |
| ILMN_3147112 | Mapk6     | 1.085068 | 0.728266 | 0.651777 | -0.07649 | 10.40482 | 7.174651 | 0.0024   | 0.022221 | 9.788544 | 10.87361 | 10.51681 |
| ILMN_2699307 | Hebp1     | -0.76146 | -0.31482 | -0.71307 | -0.39825 | 7.104655 | 7.174272 | 0.002401 | 0.022221 | 7.551992 | 6.790532 | 7.237173 |
| ILMN_1214800 | Rnf167    | 0.457489 | 0.673915 | 0.264095 | -0.40982 | 9.469042 | 7.170714 | 0.002407 | 0.02226  | 9.120167 | 9.577657 | 9.794083 |
| ILMN_2588249 | S3-12     | -0.56831 | 0.807231 | 1.047567 | 0.240336 | 7.453084 | 7.162502 | 0.002419 | 0.022367 | 7.131461 | 6.563154 | 7.938692 |
| ILMN_2812645 | Ptrh1     | -1.35739 | -0.83513 | -0.71843 | 0.116698 | 6.652978 | 7.158857 | 0.002425 | 0.022394 | 7.380718 | 6.023325 | 6.545586 |
| ILMN_1220889 | Nbr1      | 0.877928 | 0.595964 | 0.735759 | 0.139796 | 6.9511   | 7.158608 | 0.002426 | 0.022394 | 6.398687 | 7.276615 | 6.994651 |
| ILMN_2758300 | A430005L1 | -0.60515 | -0.43754 | -0.72976 | -0.29222 | 9.247559 | 7.158197 | 0.002426 | 0.022394 | 9.69067  | 9.085521 | 9.253134 |
| ILMN_2994779 | Gpsn2     | 0.720475 | 0.488414 | 0.374288 | -0.11413 | 10.00475 | 7.156616 | 0.002429 | 0.022399 | 9.60896  | 10.32944 | 10.09737 |
| ILMN_2732565 | Mrps31    | 0.260962 | -0.14682 | -0.21518 | -0.06836 | 10.65718 | 7.15621  | 0.002429 | 0.022399 | 10.68243 | 10.9434  | 10.53562 |
| ILMN_2641793 | Dtx1      | 0.449653 | 0.804889 | 0.669833 | -0.13506 | 5.392593 | 7.150568 | 0.002438 | 0.022464 | 4.911499 | 5.361152 | 5.716388 |

|              |           |          |          |          |          |          |          |          |          |          |          |          |
|--------------|-----------|----------|----------|----------|----------|----------|----------|----------|----------|----------|----------|----------|
| ILMN_2669404 | Lmnb2     | 0.928524 | 0.443519 | 0.473149 | 0.02963  | 6.764865 | 7.150091 | 0.002439 | 0.022464 | 6.303567 | 7.232091 | 6.747086 |
| ILMN_2860804 | Tfrc      | -0.88852 | -0.71243 | -0.47883 | 0.233592 | 10.63197 | 7.145259 | 0.002447 | 0.022521 | 11.15192 | 10.26339 | 10.43949 |
| ILMN_2887131 | Usp3      | -0.44875 | -0.3323  | -0.54784 | -0.21554 | 8.836575 | 7.144602 | 0.002448 | 0.022521 | 9.168798 | 8.720044 | 8.836501 |
| ILMN_2870522 | Plekha6   | 0.622328 | 0.453449 | 0.68652  | 0.233071 | 7.150161 | 7.140653 | 0.002454 | 0.022567 | 6.709586 | 7.331914 | 7.163035 |
| ILMN_2650868 | D030070LC | -0.42116 | -0.42691 | -0.89221 | -0.4653  | 7.326632 | 7.136914 | 0.00246  | 0.022609 | 7.761701 | 7.340537 | 7.334795 |
| ILMN_1234662 | Mb        | -0.40379 | -0.48    | -0.38    | 0.099996 | 4.632221 | 7.131113 | 0.002469 | 0.022683 | 4.948171 | 4.544376 | 4.46817  |
| ILMN_3160574 | 4833442J1 | -0.59961 | -1.18864 | -1.07771 | 0.110934 | 5.500992 | 7.126751 | 0.002476 | 0.022735 | 6.217481 | 5.617871 | 5.028841 |
| ILMN_1235331 | 4732467L1 | -0.95205 | -0.70428 | -0.35404 | 0.350236 | 8.911464 | 7.124048 | 0.002481 | 0.022763 | 9.414059 | 8.462005 | 8.709778 |
| ILMN_2599751 | Rabep2    | 0.773292 | 0.621286 | 0.566263 | -0.05502 | 6.442188 | 7.121528 | 0.002485 | 0.022776 | 5.951977 | 6.725269 | 6.573264 |
| ILMN_2771219 | 1110001AC | 0.921729 | 0.104594 | 0.068432 | -0.03616 | 6.335919 | 7.121339 | 0.002485 | 0.022776 | 6.06223  | 6.983959 | 6.166825 |
| ILMN_1244291 | Gja1      | -0.39725 | 0.332214 | 0.542394 | 0.21018  | 10.18328 | 7.120728 | 0.002486 | 0.022776 | 10.06395 | 9.666693 | 10.39616 |
| ILMN_1232821 | 6530402NC | 0.82413  | 0.492699 | 0.669125 | 0.176427 | 7.018807 | 7.119147 | 0.002488 | 0.022788 | 6.522319 | 7.346449 | 7.015017 |
| ILMN_2604486 | Pvrl1     | 0.399218 | 0.630563 | 0.23272  | -0.39784 | 4.95706  | 7.11829  | 0.00249  | 0.022788 | 4.641435 | 5.040653 | 5.271997 |
| ILMN_2665411 | Nnmt      | -1.19425 | -0.42065 | -0.67469 | -0.25404 | 5.218559 | 7.116408 | 0.002493 | 0.022797 | 5.790957 | 4.596707 | 5.370308 |
| ILMN_2868997 | Rangap1   | 0.778981 | 0.125272 | 0.475547 | 0.350275 | 10.31725 | 7.116102 | 0.002493 | 0.022797 | 9.972295 | 10.75128 | 10.09757 |
| ILMN_2804900 | Lyrn1     | -0.53071 | -0.57757 | -0.77148 | -0.1939  | 6.273812 | 7.113952 | 0.002497 | 0.022817 | 6.743752 | 6.213042 | 6.166179 |
| ILMN_2615741 | Eif3s8    | 0.908589 | -0.06919 | 0.259787 | 0.328981 | 7.4547   | 7.112313 | 0.0025   | 0.022829 | 7.179905 | 8.088494 | 7.110711 |
| ILMN_2966632 | Cyb5      | -0.82087 | -1.03329 | -0.60924 | 0.424048 | 9.788943 | 7.111055 | 0.002502 | 0.022836 | 10.40479 | 9.583919 | 9.371505 |
| ILMN_2910596 | Pold4     | -0.76217 | -0.39636 | -0.50531 | -0.10894 | 8.625483 | 7.108859 | 0.002505 | 0.022856 | 9.041443 | 8.279271 | 8.645079 |
| ILMN_2945472 | Acy1      | 0.602328 | 0.255188 | 0.385185 | 0.129997 | 11.88849 | 7.107591 | 0.002507 | 0.022863 | 11.57782 | 12.18015 | 11.83301 |
| ILMN_2732689 | Smc1a     | 0.667267 | 0.287027 | 0.671031 | 0.384004 | 9.045479 | 7.10657  | 0.002509 | 0.022866 | 8.639148 | 9.306415 | 8.926175 |
| ILMN_1246058 | Ppp1ca    | -0.4903  | -0.54686 | -0.62774 | -0.08088 | 11.57019 | 7.105563 | 0.002511 | 0.022869 | 11.98641 | 11.49611 | 11.43956 |
| ILMN_2758338 | Cant1     | -0.64849 | -0.4908  | -0.50067 | -0.00987 | 6.120041 | 7.104392 | 0.002512 | 0.022869 | 6.530031 | 5.881544 | 6.039231 |
| ILMN_2998303 | Katna1    | -0.42596 | -0.43415 | -0.44737 | -0.01322 | 9.346153 | 7.103949 | 0.002513 | 0.022869 | 9.673022 | 9.247067 | 9.238873 |
| ILMN_1260420 | Suv420h2  | 0.415703 | 0.525222 | 0.803176 | 0.277954 | 9.89322  | 7.100785 | 0.002518 | 0.022898 | 9.457195 | 9.872898 | 9.982417 |
| ILMN_1219275 | Rbbp7     | 0.695197 | -0.0994  | -0.2393  | -0.1399  | 8.809088 | 7.100408 | 0.002519 | 0.022898 | 8.719966 | 9.415163 | 8.620561 |
| ILMN_3105343 | Adarb1    | 0.673916 | 0.803906 | 1.010286 | 0.20638  | 5.303529 | 7.099281 | 0.002521 | 0.022903 | 4.681502 | 5.355418 | 5.485408 |
| ILMN_1255063 | Ece1      | 0.766773 | 0.29904  | 0.698976 | 0.399936 | 5.249505 | 7.097396 | 0.002524 | 0.022913 | 4.808308 | 5.575081 | 5.107347 |
| ILMN_2665625 | Fadd      | 0.686465 | 0.369208 | 0.509722 | 0.140514 | 7.128544 | 7.097045 | 0.002524 | 0.022913 | 6.737195 | 7.42366  | 7.106403 |
| ILMN_2921698 | Pcca      | -0.34646 | -0.45713 | -0.70169 | -0.24456 | 8.175105 | 7.095692 | 0.002527 | 0.022921 | 8.551423 | 8.204965 | 8.094297 |
| ILMN_1256121 | Zfp282    | 0.723553 | 0.406047 | 0.63826  | 0.232212 | 7.720201 | 7.094054 | 0.002529 | 0.022933 | 7.278236 | 8.001789 | 7.684284 |
| ILMN_2710678 | Nfic      | 0.360383 | 0.321148 | 0.858393 | 0.537244 | 5.317644 | 7.087635 | 0.00254  | 0.023017 | 4.932663 | 5.293046 | 5.253812 |
| ILMN_2622374 | Ndn       | -0.98115 | -0.11159 | 0.219163 | 0.33075  | 7.888274 | 7.086321 | 0.002542 | 0.023022 | 8.106667 | 7.125521 | 7.99508  |
| ILMN_2706882 | Donson    | -0.01461 | -0.44655 | -0.45903 | -0.01248 | 5.935517 | 7.085739 | 0.002543 | 0.023022 | 6.165565 | 6.150951 | 5.719016 |
| ILMN_2851455 | 2810408M  | -0.3053  | -0.83635 | -0.39466 | 0.441698 | 5.192913 | 7.084313 | 0.002546 | 0.023031 | 5.57699  | 5.271693 | 4.740636 |

|              |           |          |          |          |          |          |          |          |          |          |          |          |
|--------------|-----------|----------|----------|----------|----------|----------|----------|----------|----------|----------|----------|----------|
| ILMN_2941840 | Syap1     | -0.55141 | -0.46702 | -0.44145 | 0.025562 | 10.36554 | 7.081495 | 0.00255  | 0.023062 | 10.73051 | 10.1791  | 10.2635  |
| ILMN_1241236 | Cs        | 0.635182 | 0.301428 | 0.585243 | 0.283815 | 11.08954 | 7.080546 | 0.002552 | 0.023064 | 10.70907 | 11.34426 | 11.0105  |
| ILMN_2775891 | Ilf2      | -0.40039 | -0.61076 | -0.53622 | 0.074538 | 9.698298 | 7.078856 | 0.002555 | 0.023077 | 10.08514 | 9.684748 | 9.474383 |
| ILMN_3034034 | 170004711 | -0.43318 | -0.46897 | 0.257347 | 0.726314 | 6.567465 | 7.07762  | 0.002557 | 0.023084 | 6.728665 | 6.295485 | 6.259698 |
| ILMN_2728385 | Smc6l1    | 0.179356 | -0.46182 | 0.045641 | 0.507457 | 4.948335 | 7.074052 | 0.002563 | 0.023126 | 5.007539 | 5.186895 | 4.545723 |
| ILMN_2531520 | LOC381201 | 1.008439 | 0.774852 | 0.908639 | 0.133788 | 7.291798 | 7.069618 | 0.00257  | 0.023181 | 6.618815 | 7.627254 | 7.393667 |
| ILMN_1225723 | Osgepl1   | -0.50196 | -0.54988 | -0.84124 | -0.29137 | 7.787854 | 7.066867 | 0.002575 | 0.023204 | 8.261124 | 7.759165 | 7.711246 |
| ILMN_2613306 | Efhd1     | -1.06706 | -0.54592 | -0.28108 | 0.26484  | 5.447745 | 7.066464 | 0.002575 | 0.023204 | 5.921259 | 4.854203 | 5.375338 |
| ILMN_2620913 | Inppl1    | 0.458404 | 0.344912 | 0.602538 | 0.257625 | 9.837407 | 7.063282 | 0.002581 | 0.023231 | 9.485943 | 9.944347 | 9.830855 |
| ILMN_2870320 | Prkd2     | 0.328653 | 0.595184 | 0.681294 | 0.08611  | 9.162163 | 7.063143 | 0.002581 | 0.023231 | 8.760881 | 9.089534 | 9.356065 |
| ILMN_1241142 | Clmn      | 0.759216 | 1.20257  | 0.735667 | -0.4669  | 7.294075 | 7.061285 | 0.002584 | 0.023247 | 6.619712 | 7.378927 | 7.822281 |
| ILMN_2683363 | ORF61     | 0.133639 | 0.607913 | 0.49736  | -0.11055 | 9.303478 | 7.060121 | 0.002586 | 0.023252 | 8.99375  | 9.127389 | 9.601664 |
| ILMN_1235234 | Rce1      | -0.60942 | -0.41162 | -0.43691 | -0.02529 | 8.458031 | 7.058605 | 0.002589 | 0.023263 | 8.822518 | 8.213102 | 8.410896 |
| ILMN_2632489 | Ctdspl    | 0.855032 | 0.889168 | 1.135879 | 0.246711 | 7.819705 | 7.054857 | 0.002595 | 0.023308 | 7.099685 | 7.954718 | 7.988853 |
| ILMN_3062470 | Crls1     | -0.05144 | -0.54588 | -0.72257 | -0.1767  | 6.440451 | 7.049408 | 0.002604 | 0.023379 | 6.770423 | 6.718987 | 6.224547 |
| ILMN_1227907 | Gmfg      | -0.893   | -0.61289 | -0.80145 | -0.18856 | 8.557298 | 7.046303 | 0.002609 | 0.023412 | 9.134132 | 8.24113  | 8.521246 |
| ILMN_2681824 | Fbxw7     | 0.300311 | 0.19367  | 0.816316 | 0.622646 | 5.565745 | 7.045728 | 0.00261  | 0.023412 | 5.238171 | 5.538482 | 5.431841 |
| ILMN_2932518 | Ccdc56    | -0.3573  | -0.25895 | -0.46288 | -0.20393 | 12.64202 | 7.041172 | 0.002618 | 0.023469 | 12.9118  | 12.5545  | 12.65285 |
| ILMN_2620520 | Smug1     | -0.35056 | -0.61277 | -0.59783 | 0.014945 | 7.652242 | 7.039597 | 0.002621 | 0.023481 | 8.042534 | 7.691973 | 7.429759 |
| ILMN_1214974 | Il1rl1l   | -0.69523 | -0.29086 | -0.72527 | -0.43441 | 7.631463 | 7.038282 | 0.002623 | 0.023486 | 8.059305 | 7.364075 | 7.768441 |
| ILMN_2642876 | 1110008J0 | -0.57318 | -0.14244 | -0.52616 | -0.38372 | 5.30625  | 7.037698 | 0.002624 | 0.023486 | 5.616695 | 5.043519 | 5.474254 |
| ILMN_3144761 | 1110012L1 | -0.64097 | -0.5853  | -0.60062 | -0.01531 | 7.041467 | 7.036742 | 0.002626 | 0.023489 | 7.498191 | 6.857216 | 6.912887 |
| ILMN_1252698 | Btd       | 0.483522 | 0.67753  | 0.214076 | -0.46345 | 7.525962 | 7.03376  | 0.002631 | 0.023523 | 7.18218  | 7.665702 | 7.85971  |
| ILMN_1237695 | Pfkg      | 1.035424 | 0.335236 | 0.615961 | 0.280725 | 10.34736 | 7.032161 | 0.002634 | 0.023535 | 9.850702 | 10.88613 | 10.18594 |
| ILMN_2886128 | Pcdha10   | -0.16257 | 0.409766 | -0.151   | -0.56076 | 4.710096 | 7.026327 | 0.002644 | 0.023613 | 4.686045 | 4.523478 | 5.095811 |
| ILMN_2645321 | Sox18     | 0.469278 | 0.779054 | 0.833351 | 0.054297 | 6.287685 | 7.021585 | 0.002652 | 0.023674 | 5.767265 | 6.236543 | 6.546319 |
| ILMN_2421431 | Stx12     | 0.333262 | 0.337376 | 0.663233 | 0.325856 | 9.678704 | 7.020778 | 0.002653 | 0.023675 | 9.345236 | 9.678498 | 9.682612 |
| ILMN_2658786 | Cxcr3     | 0.699222 | 0.593165 | 0.450681 | -0.14248 | 5.0322   | 7.019248 | 0.002656 | 0.023686 | 4.596433 | 5.295655 | 5.189598 |
| ILMN_2787844 | Serinc3   | 0.594235 | 0.502509 | 0.807097 | 0.304588 | 11.09578 | 7.018496 | 0.002657 | 0.023686 | 10.61982 | 11.21406 | 11.12233 |
| ILMN_2592476 | Nfkb1     | 0.603302 | 0.350458 | 0.407191 | 0.056732 | 8.942731 | 7.016763 | 0.00266  | 0.0237   | 8.602494 | 9.205795 | 8.952952 |
| ILMN_1258042 | Gtpbp3    | -0.45836 | -0.28587 | -0.44002 | -0.15415 | 7.72963  | 7.01431  | 0.002665 | 0.023726 | 8.025691 | 7.567331 | 7.739824 |
| ILMN_2862386 | Rhod      | -1.23439 | -0.95687 | -0.7704  | 0.186472 | 5.940182 | 7.012023 | 0.002669 | 0.023729 | 6.680597 | 5.446202 | 5.723728 |
| ILMN_1249708 | Ddx24     | 0.503872 | 0.211189 | 0.238653 | 0.027465 | 8.209751 | 7.011065 | 0.00267  | 0.023729 | 7.971322 | 8.475194 | 8.182511 |
| ILMN_2666445 | Agpat1    | 0.729994 | 0.513545 | 0.556823 | 0.043278 | 6.885531 | 7.010939 | 0.00267  | 0.023729 | 6.43544  | 7.165434 | 6.948985 |
| ILMN_3085946 | Zfp295    | 0.682045 | 0.559791 | 0.87402  | 0.31423  | 5.897374 | 7.010659 | 0.002671 | 0.023729 | 5.36841  | 6.050455 | 5.928201 |



|              |           |          |          |          |          |          |          |          |          |          |          |          |
|--------------|-----------|----------|----------|----------|----------|----------|----------|----------|----------|----------|----------|----------|
| ILMN_1255772 | Oaz1      | -0.52668 | -0.21879 | -0.31564 | -0.09686 | 12.21655 | 7.010255 | 0.002672 | 0.023729 | 12.48183 | 11.95515 | 12.26305 |
| ILMN_2727687 | Numb      | 1.098249 | 0.707095 | 0.404433 | -0.30266 | 6.074997 | 7.008423 | 0.002675 | 0.023745 | 5.522553 | 6.620802 | 6.229648 |
| ILMN_2668536 | 4732418CC | 0.457858 | 0.317264 | 0.515339 | 0.198075 | 10.09006 | 7.006776 | 0.002678 | 0.023759 | 9.767446 | 10.2253  | 10.08471 |
| ILMN_2935789 | Rer1      | -0.74259 | -0.65345 | -0.63436 | 0.019085 | 9.554687 | 7.005396 | 0.00268  | 0.023768 | 10.06229 | 9.319695 | 9.40884  |
| ILMN_2954575 | Arhgap30  | -0.79666 | -0.01579 | -0.20619 | -0.1904  | 7.759661 | 7.004048 | 0.002683 | 0.023777 | 8.014321 | 7.217666 | 7.998528 |
| ILMN_2656894 | Bing4     | 0.493251 | 0.065797 | -0.09697 | -0.16277 | 6.717488 | 7.000928 | 0.002688 | 0.023813 | 6.601969 | 7.09522  | 6.667766 |
| ILMN_2663613 | Itgb5     | -0.07167 | 0.407354 | 0.715427 | 0.308073 | 8.382053 | 6.997096 | 0.002695 | 0.023861 | 8.119275 | 8.047609 | 8.526628 |
| ILMN_2873319 | Lypla1    | -1.25098 | -1.09596 | -0.67254 | 0.423415 | 6.522083 | 6.993551 | 0.002701 | 0.023883 | 7.276953 | 6.025974 | 6.180995 |
| ILMN_2855515 | Pnpla6    | 0.58347  | 0.554835 | 0.612026 | 0.057191 | 8.422854 | 6.993469 | 0.002701 | 0.023883 | 7.985271 | 8.568741 | 8.540106 |
| ILMN_2709166 | Susd2     | 1.193605 | 1.920746 | 1.158077 | -0.76267 | 9.302655 | 6.993364 | 0.002701 | 0.023883 | 8.234548 | 9.428153 | 10.15529 |
| ILMN_1227277 | D9Ertd392 | 0.297919 | 0.417847 | 0.753919 | 0.336073 | 9.563982 | 6.990814 | 0.002706 | 0.0239   | 9.19656  | 9.49448  | 9.614407 |
| ILMN_2773554 | Prdx2     | -0.27292 | -0.4052  | -0.43375 | -0.02854 | 12.7504  | 6.990724 | 0.002706 | 0.0239   | 13.02836 | 12.75544 | 12.62316 |
| ILMN_1231132 | 0610009I2 | -0.86798 | -0.68712 | -0.74337 | -0.05625 | 8.917837 | 6.987333 | 0.002712 | 0.023941 | 9.492452 | 8.624476 | 8.805335 |
| ILMN_2466845 | Trp53     | 0.778874 | 0.330962 | 0.239723 | -0.09124 | 8.022597 | 6.980736 | 0.002724 | 0.024026 | 7.685207 | 8.464081 | 8.016169 |
| ILMN_2738536 | Anapc5    | 0.520962 | 0.566364 | 0.666282 | 0.099918 | 10.50956 | 6.980431 | 0.002724 | 0.024026 | 10.07116 | 10.59212 | 10.63753 |
| ILMN_2721188 | Dll1      | 0.525509 | 0.60829  | 0.520783 | -0.08751 | 6.467076 | 6.978982 | 0.002727 | 0.024036 | 6.05343  | 6.578939 | 6.66172  |
| ILMN_2949844 | Acox3     | 0.867359 | 0.73823  | 0.741912 | 0.003682 | 7.693686 | 6.975996 | 0.002732 | 0.024071 | 7.106811 | 7.97417  | 7.845041 |
| ILMN_2744129 | Acad10    | 0.828393 | 0.47889  | 0.39024  | -0.08865 | 6.609298 | 6.974689 | 0.002735 | 0.024074 | 6.184917 | 7.01331  | 6.663807 |
| ILMN_3142296 | Klri1     | -0.48943 | -0.32257 | -0.54083 | -0.21826 | 4.662655 | 6.973628 | 0.002737 | 0.024074 | 5.000862 | 4.511427 | 4.678293 |
| ILMN_2987027 | Plekhg2   | 0.731091 | 0.820074 | 1.144934 | 0.32486  | 7.373033 | 6.973497 | 0.002737 | 0.024074 | 6.699009 | 7.4301   | 7.519082 |
| ILMN_2653765 | Nusap1    | -0.81628 | -0.70431 | -0.18206 | 0.522248 | 7.699057 | 6.972328 | 0.002739 | 0.024081 | 8.124718 | 7.30844  | 7.420411 |
| ILMN_2911936 | Tia1      | -0.85616 | -0.77155 | -0.14389 | 0.627659 | 5.667049 | 6.970902 | 0.002742 | 0.024091 | 6.109948 | 5.253786 | 5.338401 |
| ILMN_2832682 | Map1lc3a  | -0.59312 | -0.07219 | 0.053971 | 0.126159 | 7.526016 | 6.969535 | 0.002744 | 0.024101 | 7.678849 | 7.085731 | 7.606662 |
| ILMN_2696191 | Pip5k2c   | 0.601882 | 0.438194 | 0.596027 | 0.157834 | 9.966089 | 6.967003 | 0.002749 | 0.024129 | 9.557064 | 10.15895 | 9.995257 |
| ILMN_2971177 | BC034076  | -1.01295 | -0.12704 | 0.032337 | 0.159377 | 6.424677 | 6.961486 | 0.002759 | 0.024204 | 6.701591 | 5.688638 | 6.574551 |
| ILMN_2605096 | 2410005K2 | -0.1336  | -0.44359 | -0.55801 | -0.11441 | 9.025445 | 6.960233 | 0.002761 | 0.024212 | 9.309244 | 9.175645 | 8.865652 |
| ILMN_2519676 | Triobp    | 0.454081 | 0.435297 | 0.719825 | 0.284528 | 11.13261 | 6.953642 | 0.002773 | 0.024305 | 10.73031 | 11.18439 | 11.1656  |
| ILMN_1237750 | 1810060D1 | -0.55932 | -0.19783 | -0.49825 | -0.30042 | 10.67298 | 6.946331 | 0.002786 | 0.024409 | 10.98683 | 10.42751 | 10.789   |
| ILMN_2600113 | Gtpbp2    | 0.254581 | 0.617287 | 0.699732 | 0.082444 | 10.94006 | 6.944454 | 0.00279  | 0.024427 | 10.54716 | 10.80174 | 11.16444 |
| ILMN_2625920 | Aoc3      | -0.1111  | 0.744722 | 1.028118 | 0.283396 | 9.065637 | 6.939812 | 0.002798 | 0.02449  | 8.650201 | 8.539103 | 9.394923 |
| ILMN_1224023 | Eps8l3    | 0.546697 | 0.619094 | 0.488326 | -0.13077 | 11.00981 | 6.936989 | 0.002803 | 0.024523 | 10.59628 | 11.14297 | 11.21537 |
| ILMN_2420200 | Usp8      | 0.755984 | -0.00773 | 0.328491 | 0.336217 | 5.249478 | 6.935316 | 0.002806 | 0.024538 | 4.980291 | 5.736274 | 4.972564 |
| ILMN_1217827 | 2810002NC | -0.541   | -0.45495 | -0.71529 | -0.26034 | 9.06588  | 6.933224 | 0.00281  | 0.024559 | 9.493691 | 8.952694 | 9.038738 |
| ILMN_2698738 | D15Ertd73 | 0.118332 | 0.457887 | 0.620245 | 0.162358 | 7.166162 | 6.931911 | 0.002813 | 0.024568 | 6.867046 | 6.985379 | 7.324933 |
| ILMN_2659052 | Ccnb1     | -0.36526 | -0.85029 | -0.68384 | 0.166454 | 6.161038 | 6.93003  | 0.002816 | 0.024578 | 6.635886 | 6.270622 | 5.785595 |

|              |            |          |          |          |          |          |          |          |          |          |          |          |
|--------------|------------|----------|----------|----------|----------|----------|----------|----------|----------|----------|----------|----------|
| ILMN_2919433 | Cdc45l     | -0.06252 | -0.81403 | -0.75608 | 0.057947 | 6.292795 | 6.929784 | 0.002817 | 0.024578 | 6.700951 | 6.638434 | 5.886924 |
| ILMN_2672767 | Actn4      | 0.760971 | 0.821822 | 0.894252 | 0.07243  | 10.66693 | 6.928942 | 0.002818 | 0.024579 | 10.04766 | 10.80864 | 10.86949 |
| ILMN_2753589 | 36324510C  | -0.44996 | -0.26761 | 0.198389 | 0.466001 | 5.213339 | 6.926026 | 0.002824 | 0.024614 | 5.343134 | 4.893178 | 5.075521 |
| ILMN_2855998 | Plek2      | -0.84503 | -0.80176 | -0.73505 | 0.066711 | 9.709036 | 6.923408 | 0.002829 | 0.024644 | 10.3045  | 9.459467 | 9.502734 |
| ILMN_2682271 | 150000211C | -1.13373 | -0.73088 | -0.6343  | 0.096579 | 7.252209 | 6.919494 | 0.002836 | 0.024696 | 7.876936 | 6.743204 | 7.146058 |
| ILMN_2647170 | Serhl      | -0.6114  | -0.69497 | -0.74411 | -0.04914 | 8.552879 | 6.917661 | 0.002839 | 0.024713 | 9.065501 | 8.454099 | 8.370527 |
| ILMN_2651526 | Btbd12     | 0.505256 | 0.645345 | 0.715649 | 0.070304 | 8.30358  | 6.908162 | 0.002857 | 0.024856 | 7.837018 | 8.342274 | 8.482362 |
| ILMN_2830098 | Bahd1      | 0.334372 | 0.553005 | 0.63516  | 0.082156 | 7.361308 | 6.906342 | 0.002861 | 0.024873 | 6.980674 | 7.315046 | 7.533679 |
| ILMN_2613422 | Itk        | 0.797821 | 0.426162 | 0.472241 | 0.046079 | 5.318633 | 6.903753 | 0.002865 | 0.024899 | 4.894577 | 5.692398 | 5.320739 |
| ILMN_2665797 | 4933427L0  | 0.662611 | 0.382173 | 0.598895 | 0.216722 | 9.335236 | 6.903267 | 0.002866 | 0.024899 | 8.924316 | 9.586927 | 9.306489 |
| ILMN_1221919 | Clcn3      | 0.658169 | 0.386563 | 0.803722 | 0.41716  | 5.994464 | 6.901481 | 0.00287  | 0.024916 | 5.532351 | 6.19052  | 5.918913 |
| ILMN_1215969 | D12Wsu95   | 0.522751 | 0.465254 | 0.7676   | 0.302345 | 5.608244 | 6.897063 | 0.002878 | 0.024976 | 5.169343 | 5.692094 | 5.634598 |
| ILMN_2915279 | Mov10      | 0.834357 | 0.836738 | 0.669422 | -0.16732 | 6.335409 | 6.894427 | 0.002883 | 0.025007 | 5.750279 | 6.584636 | 6.587018 |
| ILMN_3008475 | Cyb5r4     | -0.56221 | -0.3916  | -0.42829 | -0.0367  | 9.365375 | 6.892792 | 0.002886 | 0.025015 | 9.710899 | 9.148688 | 9.319304 |
| ILMN_1225552 | Arsa       | 0.672368 | 0.478842 | 0.413286 | -0.06556 | 8.173869 | 6.892458 | 0.002887 | 0.025015 | 7.782745 | 8.455113 | 8.261587 |
| ILMN_2424937 | Tnrc6      | 0.446335 | 0.594786 | 0.835972 | 0.241186 | 7.662705 | 6.89043  | 0.002891 | 0.025036 | 7.193432 | 7.639767 | 7.788218 |
| ILMN_1220313 | Gtpbp1     | 0.555078 | -0.08382 | -0.04505 | 0.038767 | 4.911782 | 6.888378 | 0.002895 | 0.025047 | 4.805232 | 5.360309 | 4.721411 |
| ILMN_3144963 | Taf9       | -0.40088 | -0.40381 | -0.60623 | -0.20242 | 6.785329 | 6.888296 | 0.002895 | 0.025047 | 7.138056 | 6.737181 | 6.734249 |
| ILMN_2873444 | Fbxo32     | -0.89227 | 0.011085 | 0.316823 | 0.305738 | 6.729667 | 6.886102 | 0.002899 | 0.02507  | 6.870758 | 5.978487 | 6.881843 |
| ILMN_1239857 | Extl3      | 0.456187 | 0.606068 | 0.89215  | 0.286082 | 8.858338 | 6.884668 | 0.002902 | 0.025082 | 8.369736 | 8.825923 | 8.975805 |
| ILMN_1225348 | C230093N1  | 0.775228 | 0.634553 | 0.845671 | 0.211119 | 11.80805 | 6.882143 | 0.002907 | 0.025103 | 11.24418 | 12.01941 | 11.87874 |
| ILMN_2796382 | Cdsn       | 0.067373 | 0.531745 | -0.03427 | -0.56602 | 4.705291 | 6.881704 | 0.002907 | 0.025103 | 4.564079 | 4.631453 | 5.095824 |
| ILMN_1228253 | Tmem111    | -0.30918 | -0.55195 | -0.5796  | -0.02764 | 7.534413 | 6.881137 | 0.002909 | 0.025103 | 7.894596 | 7.585415 | 7.342643 |
| ILMN_2671767 | Ift20      | -0.82842 | -0.78125 | -0.68685 | 0.094396 | 7.23716  | 6.879313 | 0.002912 | 0.025121 | 7.811289 | 6.982872 | 7.030041 |
| ILMN_2599794 | Apoc1      | -1.43986 | 0.256707 | -0.68772 | -0.94443 | 6.065461 | 6.874717 | 0.002921 | 0.025163 | 6.53318  | 5.093315 | 6.789887 |
| ILMN_2606736 | Ptprk      | 0.717663 | 0.127004 | 0.223186 | 0.096182 | 4.916771 | 6.874252 | 0.002922 | 0.025163 | 4.649808 | 5.367471 | 4.776812 |
| ILMN_2456495 | Zfp553     | 0.351603 | 0.204382 | 0.670491 | 0.466109 | 4.978838 | 6.874001 | 0.002922 | 0.025163 | 4.672219 | 5.023822 | 4.876601 |
| ILMN_2639397 | Dhrs1      | 1.020814 | 0.890119 | 0.568062 | -0.32206 | 12.20503 | 6.873767 | 0.002923 | 0.025163 | 11.58528 | 12.6061  | 12.4754  |
| ILMN_2513826 | Tnfrsf11b  | -0.79955 | -0.09238 | -0.13788 | -0.04551 | 6.487745 | 6.872158 | 0.002926 | 0.025174 | 6.745196 | 5.945649 | 6.65282  |
| ILMN_2745971 | Banf1      | -0.43576 | -0.21752 | -0.61003 | -0.39251 | 9.796096 | 6.871222 | 0.002928 | 0.025174 | 10.11192 | 9.676162 | 9.894405 |
| ILMN_2626260 | Arpc5l     | -0.32612 | -0.57545 | -0.40025 | 0.1752   | 6.197153 | 6.87045  | 0.002929 | 0.025174 | 6.522606 | 6.196487 | 5.947158 |
| ILMN_3058077 | Nhp2l1     | -0.42899 | -0.34292 | -0.77881 | -0.4359  | 6.217925 | 6.870142 | 0.00293  | 0.025174 | 6.605605 | 6.176611 | 6.26269  |
| ILMN_1226366 | Uck1       | -0.47453 | -0.34783 | -0.60154 | -0.25371 | 6.674375 | 6.867851 | 0.002934 | 0.0252   | 7.030351 | 6.555816 | 6.68252  |
| ILMN_2592095 | Gtrgeo22   | -0.56691 | -0.36773 | -0.37948 | -0.01175 | 7.839452 | 6.862449 | 0.002945 | 0.025277 | 8.167982 | 7.601074 | 7.800252 |
| ILMN_2605094 | 2410005K2  | -0.10914 | -0.40308 | -0.5608  | -0.15772 | 8.76374  | 6.860691 | 0.002948 | 0.025293 | 9.031995 | 8.922851 | 8.628916 |

|              |           |          |          |          |          |          |          |          |          |          |          |          |
|--------------|-----------|----------|----------|----------|----------|----------|----------|----------|----------|----------|----------|----------|
| ILMN_1239662 | Slc4a2    | 0.289368 | 0.207882 | 0.530456 | 0.322574 | 9.963391 | 6.860013 | 0.00295  | 0.025293 | 9.706465 | 9.995833 | 9.914347 |
| ILMN_2696749 | Rac3      | -0.68714 | -0.53951 | -0.52974 | 0.009776 | 4.810522 | 6.856407 | 0.002957 | 0.025333 | 5.24962  | 4.56248  | 4.710107 |
| ILMN_2738054 | Plekhhg2  | 0.632663 | 0.764733 | 1.109621 | 0.344887 | 8.1645   | 6.856145 | 0.002957 | 0.025333 | 7.537746 | 8.170408 | 8.302479 |
| ILMN_2741677 | Bach1     | 0.62881  | 0.31435  | 0.89263  | 0.57828  | 6.707364 | 6.854859 | 0.00296  | 0.025333 | 6.248416 | 6.877226 | 6.562767 |
| ILMN_3000108 | Lsm6      | -0.58951 | -0.49441 | -0.45666 | 0.037749 | 8.817017 | 6.85466  | 0.00296  | 0.025333 | 9.202164 | 8.612651 | 8.707753 |
| ILMN_2605890 | Tk1       | -0.64368 | -0.56626 | -0.7098  | -0.14353 | 8.989082 | 6.85392  | 0.002961 | 0.025333 | 9.469018 | 8.825336 | 8.902753 |
| ILMN_2908065 | Gtse1     | 0.170816 | -0.43875 | 0.179919 | 0.618668 | 5.122404 | 6.850757 | 0.002968 | 0.02537  | 5.144407 | 5.315223 | 4.705658 |
| ILMN_2443725 | Ube2d3    | -0.83938 | -0.77324 | -0.72908 | 0.044165 | 5.86993  | 6.849344 | 0.00297  | 0.02537  | 6.455355 | 5.615975 | 5.682112 |
| ILMN_3002284 | Yeats4    | -0.57987 | -0.42195 | -0.45558 | -0.03363 | 8.158011 | 6.847613 | 0.002974 | 0.02537  | 8.522361 | 7.942489 | 8.100414 |
| ILMN_2694578 | Sec63     | 0.655359 | 0.343147 | 0.360451 | 0.017304 | 8.824951 | 6.847543 | 0.002974 | 0.02537  | 8.485212 | 9.14057  | 8.828359 |
| ILMN_2636266 | Dmn       | 0.264376 | 0.816433 | 1.432532 | 0.616099 | 7.405838 | 6.84702  | 0.002975 | 0.02537  | 6.777503 | 7.041879 | 7.593936 |
| ILMN_3072427 | Il1rn     | -0.79928 | -0.65144 | -0.3866  | 0.264841 | 5.131434 | 6.846229 | 0.002977 | 0.02537  | 5.590765 | 4.791488 | 4.939321 |
| ILMN_1246452 | Wdr22     | 0.438196 | 0.498096 | 0.583828 | 0.085732 | 6.938254 | 6.845346 | 0.002978 | 0.02537  | 6.558224 | 6.99642  | 7.05632  |
| ILMN_2520096 | Zfp62     | 0.458215 | -0.06075 | -0.01657 | 0.044185 | 4.814262 | 6.845304 | 0.002978 | 0.02537  | 4.719037 | 5.177252 | 4.658287 |
| ILMN_2679695 | 1810059A2 | -0.25138 | -0.4188  | -0.59654 | -0.17773 | 7.085016 | 6.845069 | 0.002979 | 0.02537  | 7.401696 | 7.150313 | 6.982892 |
| ILMN_2479370 | Tm4sf4    | 0.35977  | 1.140594 | -0.08863 | -1.22923 | 11.5405  | 6.841416 | 0.002986 | 0.025419 | 11.18757 | 11.54734 | 12.32816 |
| ILMN_2454204 | Tnfrsf22  | 0.869466 | 1.044873 | 1.056476 | 0.011602 | 6.251595 | 6.830083 | 0.003009 | 0.025598 | 5.508892 | 6.378358 | 6.553765 |
| ILMN_1258846 | Hrb2      | 0.624531 | 0.252718 | 0.001874 | -0.25084 | 6.336055 | 6.826403 | 0.003016 | 0.025646 | 6.116274 | 6.740806 | 6.368992 |
| ILMN_2424605 | Txnrd2    | 0.57486  | 0.508931 | 0.338874 | -0.17006 | 8.235695 | 6.825802 | 0.003017 | 0.025646 | 7.880029 | 8.454889 | 8.38896  |
| ILMN_2690441 | Tfb1m     | -0.27217 | -0.46797 | -0.71928 | -0.25131 | 5.581258 | 6.823728 | 0.003021 | 0.025669 | 5.946112 | 5.673942 | 5.478141 |
| ILMN_2701778 | Itga11    | -0.80951 | -0.28131 | 0.080635 | 0.361942 | 7.06854  | 6.820172 | 0.003028 | 0.025712 | 7.321087 | 6.511572 | 7.03978  |
| ILMN_1240839 | 0610012CC | -0.7201  | -0.44548 | -0.53215 | -0.08667 | 10.6979  | 6.819705 | 0.003029 | 0.025712 | 11.12233 | 10.40223 | 10.67685 |
| ILMN_2909634 | Trappc3   | -0.36469 | -0.44468 | -0.44524 | -0.00056 | 10.36233 | 6.818882 | 0.003031 | 0.025714 | 10.67599 | 10.3113  | 10.2313  |
| ILMN_1238058 | BC019977  | -0.30899 | 0.184593 | 0.276983 | 0.09239  | 6.80643  | 6.817648 | 0.003034 | 0.025722 | 6.768283 | 6.459296 | 6.952875 |
| ILMN_2508410 | Ubqln1    | 0.671378 | 0.344933 | 0.651429 | 0.306496 | 10.39572 | 6.799896 | 0.00307  | 0.026015 | 9.978782 | 10.65016 | 10.32372 |
| ILMN_1248108 | Lyplal1   | -0.90886 | -0.79037 | -0.74828 | 0.042088 | 4.995922 | 6.798655 | 0.003072 | 0.026021 | 5.607801 | 4.698937 | 4.81743  |
| ILMN_2617087 | Egln1     | 0.670236 | 0.45804  | 0.766785 | 0.308745 | 5.47544  | 6.797969 | 0.003074 | 0.026021 | 5.001675 | 5.671911 | 5.459715 |
| ILMN_2679823 | 1110059PC | -0.20074 | -0.68857 | -0.35038 | 0.338186 | 5.280772 | 6.797335 | 0.003075 | 0.026021 | 5.590692 | 5.389956 | 4.902127 |
| ILMN_1217408 | Prkacb    | 0.360012 | 0.573982 | 0.943593 | 0.369611 | 10.19127 | 6.794568 | 0.00308  | 0.026057 | 9.721873 | 10.08188 | 10.29585 |
| ILMN_1237234 | A530046H  | 0.623292 | 0.320644 | 0.220176 | -0.10047 | 5.495242 | 6.790256 | 0.003089 | 0.026119 | 5.204214 | 5.827506 | 5.524858 |
| ILMN_2594796 | Rfk       | -0.44243 | -0.44801 | -0.47515 | -0.02714 | 4.606595 | 6.788117 | 0.003094 | 0.026143 | 4.947991 | 4.505558 | 4.499986 |
| ILMN_2637365 | 1500003D1 | -0.76218 | -0.39846 | -0.51399 | -0.11554 | 8.466051 | 6.786688 | 0.003097 | 0.026156 | 8.884708 | 8.122528 | 8.486252 |
| ILMN_1224980 | A930016P2 | -0.51902 | -0.44558 | -0.59387 | -0.14828 | 6.556674 | 6.781986 | 0.003106 | 0.026213 | 6.946291 | 6.427273 | 6.500708 |
| ILMN_1245579 | Jak2      | 0.603104 | 0.539271 | 0.64578  | 0.106509 | 9.593933 | 6.781919 | 0.003107 | 0.026213 | 9.146894 | 9.749998 | 9.686165 |
| ILMN_2650275 | 1810055GC | 0.855594 | 0.604082 | 0.603818 | -0.00026 | 11.73094 | 6.780125 | 0.00311  | 0.026226 | 11.21507 | 12.07066 | 11.81915 |

|              |           |          |          |          |          |          |          |          |          |          |          |          |
|--------------|-----------|----------|----------|----------|----------|----------|----------|----------|----------|----------|----------|----------|
| ILMN_2744909 | Gmppb     | -0.5993  | -0.61754 | -0.87756 | -0.26002 | 8.145401 | 6.779748 | 0.003111 | 0.026226 | 8.669003 | 8.069702 | 8.051458 |
| ILMN_2745841 | 2310066NC | 0.08656  | -0.55577 | -0.69455 | -0.13878 | 6.010826 | 6.777312 | 0.003116 | 0.026247 | 6.301767 | 6.388327 | 5.745997 |
| ILMN_1238213 | A230072I1 | -0.72004 | -0.24006 | -0.37998 | -0.13992 | 6.67357  | 6.777067 | 0.003117 | 0.026247 | 7.008591 | 6.288551 | 6.768526 |
| ILMN_1244272 | Epb4.1I3  | 0.486419 | 0.224544 | 0.624688 | 0.400145 | 12.77271 | 6.775445 | 0.00312  | 0.026263 | 12.4388  | 12.92522 | 12.66334 |
| ILMN_1249606 | 1500016H1 | -0.28473 | -0.36028 | -0.60651 | -0.24623 | 9.374741 | 6.773452 | 0.003124 | 0.026285 | 9.687622 | 9.402892 | 9.327338 |
| ILMN_2657066 | Ep400     | 0.550502 | 0.373689 | 0.674546 | 0.300857 | 8.120513 | 6.771761 | 0.003128 | 0.026302 | 7.720828 | 8.27133  | 8.094518 |
| ILMN_2613399 | Scye1     | -0.52343 | -0.53899 | -0.56833 | -0.02934 | 10.44435 | 6.768493 | 0.003134 | 0.026347 | 10.85204 | 10.3286  | 10.31304 |
| ILMN_2712280 | Ormdl3    | 0.569884 | 0.700212 | 0.569352 | -0.13086 | 11.13646 | 6.765422 | 0.003141 | 0.02638  | 10.6766  | 11.24649 | 11.37681 |
| ILMN_1232225 | Pigh      | -0.04949 | -0.63785 | -0.56943 | 0.068422 | 5.676372 | 6.765163 | 0.003141 | 0.02638  | 5.990566 | 5.941074 | 5.352712 |
| ILMN_2705848 | Decr2     | 0.498073 | 0.229216 | -0.33314 | -0.56236 | 7.511765 | 6.763453 | 0.003145 | 0.026397 | 7.413228 | 7.911301 | 7.642444 |
| ILMN_1228568 | Irf2bp1   | 0.85515  | 0.494862 | 0.643535 | 0.148673 | 7.794507 | 6.759867 | 0.003153 | 0.026448 | 7.29612  | 8.15127  | 7.790982 |
| ILMN_2786763 | Rab5a     | -0.64552 | -0.54361 | -0.776   | -0.23239 | 8.512516 | 6.758178 | 0.003156 | 0.026456 | 9.003799 | 8.358282 | 8.460186 |
| ILMN_2940358 | C030048BC | -0.58462 | -0.38139 | -0.09133 | 0.290063 | 7.574924 | 6.757945 | 0.003157 | 0.026456 | 7.83926  | 7.254643 | 7.457865 |
| ILMN_1217444 | Ppp2r5e   | 0.491925 | 0.116456 | 0.650794 | 0.534338 | 5.64125  | 6.756946 | 0.003159 | 0.026461 | 5.326456 | 5.818381 | 5.442912 |
| ILMN_2847869 | B230219D2 | -0.72303 | -0.44902 | -0.3918  | 0.057221 | 8.315026 | 6.751845 | 0.003169 | 0.026538 | 8.705991 | 7.982961 | 8.256966 |
| ILMN_1224368 | Idh3g     | 0.432141 | -0.00761 | -0.19566 | -0.18805 | 10.09484 | 6.749764 | 0.003174 | 0.026561 | 10.03762 | 10.46977 | 10.03002 |
| ILMN_2683414 | D11Moh34  | -0.61388 | -0.37385 | -0.41384 | -0.03999 | 7.349596 | 6.749117 | 0.003175 | 0.026561 | 7.699988 | 7.086104 | 7.326139 |
| ILMN_1214118 | Plekha2   | 0.424746 | 0.029149 | 0.533725 | 0.504576 | 9.742325 | 6.739631 | 0.003195 | 0.026717 | 9.49542  | 9.920166 | 9.524569 |
| ILMN_1231996 | Pip5k2b   | 0.601456 | 0.558198 | 0.629549 | 0.071351 | 6.650229 | 6.737455 | 0.0032   | 0.026743 | 6.202928 | 6.804384 | 6.761126 |
| ILMN_1231573 | Serpib1a  | -1.02707 | -0.8535  | -0.60465 | 0.248854 | 11.70333 | 6.736348 | 0.003202 | 0.026748 | 12.32464 | 11.29757 | 11.47114 |
| ILMN_2652971 | Deb1      | -0.60246 | -0.45634 | -0.43996 | 0.016375 | 11.95682 | 6.735397 | 0.003204 | 0.026748 | 12.33151 | 11.72905 | 11.87518 |
| ILMN_2895000 | Slc35c2   | 0.82022  | 0.770664 | 0.715009 | -0.05566 | 10.43466 | 6.735037 | 0.003205 | 0.026748 | 9.858191 | 10.67841 | 10.62886 |
| ILMN_1236601 | Pole4     | -0.52585 | -0.95981 | -0.42124 | 0.538567 | 5.888825 | 6.730814 | 0.003214 | 0.026805 | 6.365551 | 5.839701 | 5.40574  |
| ILMN_2722081 | Clcn3     | 0.803458 | 0.820255 | 0.630486 | -0.18977 | 8.658881 | 6.73041  | 0.003215 | 0.026805 | 8.095331 | 8.898789 | 8.915586 |
| ILMN_1226325 | Cnm2      | 0.896512 | 0.906295 | 0.677083 | -0.22921 | 7.77104  | 6.729148 | 0.003218 | 0.026815 | 7.151068 | 8.04758  | 8.057363 |
| ILMN_1245115 | B430104HC | -0.29429 | -0.42395 | -0.80945 | -0.3855  | 7.117659 | 6.722292 | 0.003233 | 0.026922 | 7.499581 | 7.205289 | 7.075631 |
| ILMN_2943387 | Vip       | -1.60362 | -0.35695 | -0.53506 | -0.17811 | 8.128099 | 6.721756 | 0.003234 | 0.026922 | 8.752008 | 7.148384 | 8.395057 |
| ILMN_2862093 | Copz1     | 0.455825 | 0.325561 | 0.407724 | 0.082163 | 11.83419 | 6.719805 | 0.003238 | 0.026944 | 11.53691 | 11.99274 | 11.86247 |
| ILMN_2939367 | Zfp608    | -0.73305 | -0.13981 | -0.24809 | -0.10828 | 7.787253 | 6.714784 | 0.003249 | 0.02701  | 8.067492 | 7.334443 | 7.927677 |
| ILMN_1236368 | D730049HC | -0.01966 | 0.244487 | 0.508156 | 0.263669 | 8.890393 | 6.714716 | 0.003249 | 0.02701  | 8.707147 | 8.68749  | 8.951634 |
| ILMN_1243717 | Opa1      | 0.813615 | 0.161657 | 0.320097 | 0.15844  | 5.222838 | 6.71294  | 0.003253 | 0.027019 | 4.898996 | 5.712611 | 5.060653 |
| ILMN_2664670 | 4833439L1 | 0.704828 | 0.519301 | 0.529507 | 0.010206 | 8.205963 | 6.712779 | 0.003253 | 0.027019 | 7.767554 | 8.472383 | 8.286855 |
| ILMN_2650775 | C78541    | -0.08424 | -0.32585 | -0.59811 | -0.27227 | 7.341779 | 6.70899  | 0.003262 | 0.027075 | 7.593828 | 7.509591 | 7.267982 |
| ILMN_2662962 | Rhot2     | 0.523317 | 0.5803   | 0.120259 | -0.46004 | 5.269151 | 6.706553 | 0.003267 | 0.027106 | 4.963182 | 5.486499 | 5.543482 |
| ILMN_2739760 | Prelp     | 0.546123 | 0.73161  | 1.231107 | 0.499498 | 9.566888 | 6.703995 | 0.003272 | 0.02714  | 8.939678 | 9.485801 | 9.671287 |

|              |            |          |          |          |          |          |          |          |          |          |          |          |
|--------------|------------|----------|----------|----------|----------|----------|----------|----------|----------|----------|----------|----------|
| ILMN_1240871 | 4633402N2  | -0.21625 | -0.52573 | -0.60075 | -0.07502 | 6.271914 | 6.700783 | 0.00328  | 0.027183 | 6.607598 | 6.39135  | 6.081865 |
| ILMN_1222803 | Hspa9      | 0.923731 | 0.332017 | 0.284719 | -0.0473  | 10.16236 | 6.700116 | 0.003281 | 0.027183 | 9.777238 | 10.70097 | 10.10926 |
| ILMN_2711045 | Sirt5      | 0.335061 | -0.31169 | -0.24754 | 0.064156 | 6.344716 | 6.699512 | 0.003282 | 0.027183 | 6.400759 | 6.73582  | 6.089064 |
| ILMN_2759344 | 1600023AC  | -0.58371 | -0.39965 | -0.70883 | -0.30917 | 4.731406 | 6.695503 | 0.003291 | 0.027243 | 5.154454 | 4.570742 | 4.754801 |
| ILMN_2958076 | 1110001J0  | -0.7393  | -0.40243 | -0.56417 | -0.16174 | 11.17538 | 6.693866 | 0.003295 | 0.02726  | 11.60186 | 10.86256 | 11.19943 |
| ILMN_2713396 | BC067068   | -0.61222 | -0.64357 | -0.6417  | 0.001872 | 5.799041 | 6.691774 | 0.003299 | 0.027285 | 6.273413 | 5.661193 | 5.629843 |
| ILMN_2945806 | Grpel1     | -0.70193 | -0.53656 | -0.69683 | -0.16026 | 9.960448 | 6.685976 | 0.003312 | 0.027375 | 10.44428 | 9.742346 | 9.907714 |
| ILMN_2791074 | Wdr60      | -0.56101 | -0.38036 | -0.03548 | 0.344879 | 5.397666 | 6.685432 | 0.003313 | 0.027375 | 5.641879 | 5.080872 | 5.261518 |
| ILMN_2741402 | Sspn       | -0.51737 | 0.379083 | 0.690266 | 0.311183 | 8.180137 | 6.680985 | 0.003323 | 0.027437 | 8.042143 | 7.524771 | 8.421226 |
| ILMN_3124160 | D030051N:  | 0.559942 | 0.473255 | 0.476555 | 0.0033   | 7.578588 | 6.680648 | 0.003324 | 0.027437 | 7.201151 | 7.761092 | 7.674406 |
| ILMN_2610204 | Mtch2      | -0.13586 | -0.52845 | -0.65164 | -0.12319 | 10.17994 | 6.679431 | 0.003327 | 0.027447 | 10.50893 | 10.37307 | 9.980485 |
| ILMN_2666438 | Polr2i     | -0.60852 | -0.2534  | -0.41638 | -0.16298 | 9.215483 | 6.675484 | 0.003336 | 0.027507 | 9.53506  | 8.92654  | 9.281658 |
| ILMN_3074952 | Copg       | -0.62326 | -0.4098  | -0.74605 | -0.33626 | 7.184338 | 6.672494 | 0.003342 | 0.027548 | 7.629115 | 7.005859 | 7.219318 |
| ILMN_2736094 | Mrps31     | 0.324846 | -0.12243 | -0.28477 | -0.16235 | 9.01447  | 6.671821 | 0.003344 | 0.027548 | 9.035059 | 9.359904 | 8.912632 |
| ILMN_2804444 | Pcdh17     | -0.1752  | 0.387962 | 0.66305  | 0.275088 | 5.089964 | 6.670194 | 0.003347 | 0.027565 | 4.871012 | 4.695811 | 5.258973 |
| ILMN_2674655 | 1110018J1: | -0.66145 | -0.32218 | -0.56556 | -0.24338 | 6.6558   | 6.669212 | 0.00335  | 0.02757  | 7.043098 | 6.381651 | 6.720916 |
| ILMN_2595612 | ldh2       | -0.54307 | -0.86386 | -0.3074  | 0.556467 | 7.063533 | 6.668023 | 0.003352 | 0.027579 | 7.492116 | 6.949042 | 6.628254 |
| ILMN_1225191 | 9130210N2  | 0.553754 | 0.475709 | 0.596039 | 0.12033  | 12.23069 | 6.665392 | 0.003358 | 0.027597 | 11.82432 | 12.37807 | 12.30003 |
| ILMN_1229687 | Rnf141     | -0.62321 | -0.6724  | -0.86372 | -0.19132 | 7.206165 | 6.665252 | 0.003359 | 0.027597 | 7.745998 | 7.122784 | 7.073596 |
| ILMN_2931411 | Cct3       | -0.08916 | -0.45383 | -0.60164 | -0.1478  | 10.68795 | 6.664755 | 0.00336  | 0.027597 | 10.97411 | 10.88495 | 10.52027 |
| ILMN_2602140 | Eif2b5     | -0.21911 | -0.41876 | -0.40956 | 0.009199 | 9.90957  | 6.664282 | 0.003361 | 0.027597 | 10.17143 | 9.952319 | 9.752668 |
| ILMN_2877029 | Cytl1      | -0.22374 | 0.561237 | 0.408494 | -0.15274 | 5.182924 | 6.662207 | 0.003365 | 0.027622 | 4.996427 | 4.772683 | 5.557664 |
| ILMN_2594714 | Ets2       | 0.490585 | 0.369752 | 0.478578 | 0.108825 | 10.90032 | 6.661012 | 0.003368 | 0.027624 | 10.56559 | 11.05618 | 10.93534 |
| ILMN_2799368 | Gtpbp8     | -0.75264 | -0.48898 | -0.64343 | -0.15445 | 6.608814 | 6.660696 | 0.003369 | 0.027624 | 7.080076 | 6.327435 | 6.591099 |
| ILMN_2609614 | Snx10      | -0.66796 | -0.44219 | -0.62328 | -0.18109 | 7.605605 | 6.656116 | 0.003379 | 0.027689 | 8.038963 | 7.371004 | 7.596771 |
| ILMN_2694245 | Srp14      | -0.65842 | -0.34696 | -0.65406 | -0.3071  | 8.39833  | 6.65578  | 0.00338  | 0.027689 | 8.813188 | 8.15477  | 8.466229 |
| ILMN_2659997 | MGC29978   | 2.562533 | 2.637651 | 1.195728 | -1.44192 | 10.76693 | 6.654795 | 0.003382 | 0.027695 | 9.167951 | 11.73048 | 11.8056  |
| ILMN_1256103 | Ccbl2      | 0.53535  | 0.050667 | -0.12561 | -0.17628 | 5.557935 | 6.652612 | 0.003387 | 0.027722 | 5.442834 | 5.978184 | 5.493501 |
| ILMN_2964324 | Igfbp5     | 0.495472 | 1.054581 | 1.606136 | 0.551555 | 8.088701 | 6.649809 | 0.003394 | 0.027762 | 7.299654 | 7.795126 | 8.354235 |
| ILMN_1245489 | 2310067B1  | 0.502567 | 0.317293 | 0.677301 | 0.360009 | 6.981034 | 6.648467 | 0.003397 | 0.027765 | 6.606744 | 7.109311 | 6.924036 |
| ILMN_2981896 | 1810021J1: | -0.84493 | -0.63999 | -0.6428  | -0.00282 | 7.051931 | 6.647549 | 0.003399 | 0.027765 | 7.583862 | 6.738933 | 6.943873 |
| ILMN_3160697 | Angel2     | 0.436243 | 0.310784 | 0.472625 | 0.161841 | 9.755815 | 6.647446 | 0.003399 | 0.027765 | 9.450902 | 9.887145 | 9.761686 |
| ILMN_2642063 | Ict1       | -0.54962 | -0.40085 | -0.70961 | -0.30875 | 8.268623 | 6.64642  | 0.003401 | 0.027765 | 8.683645 | 8.134023 | 8.28279  |
| ILMN_2972392 | Hax1       | -0.45845 | -0.39921 | -0.68535 | -0.28614 | 7.251474 | 6.646152 | 0.003402 | 0.027765 | 7.637227 | 7.178781 | 7.238013 |
| ILMN_2944366 | Hspb8      | -0.67108 | 0.149844 | 0.250641 | 0.100797 | 6.336859 | 6.643863 | 0.003407 | 0.027777 | 6.404508 | 5.73343  | 6.554352 |

|              |           |          |          |          |          |          |          |          |          |          |          |          |
|--------------|-----------|----------|----------|----------|----------|----------|----------|----------|----------|----------|----------|----------|
| ILMN_2872499 | EG330503  | -0.00388 | -0.05488 | 0.396453 | 0.451328 | 4.672122 | 6.643505 | 0.003408 | 0.027777 | 4.587699 | 4.583814 | 4.532824 |
| ILMN_1236904 | Mrpl23    | -0.52228 | -0.32549 | -0.50009 | -0.17461 | 11.55478 | 6.643386 | 0.003408 | 0.027777 | 11.89174 | 11.36946 | 11.56626 |
| ILMN_1233784 | Wdr34     | -0.67896 | -0.35748 | -0.49694 | -0.13946 | 6.686296 | 6.640601 | 0.003415 | 0.027816 | 7.069641 | 6.390677 | 6.712165 |
| ILMN_2466034 | Ubl4      | -0.68492 | -0.413   | -0.7543  | -0.3413  | 9.437647 | 6.631519 | 0.003436 | 0.027974 | 9.900701 | 9.215778 | 9.487705 |
| ILMN_3153614 | 1110020AC | -0.40949 | -0.45197 | -0.6506  | -0.19863 | 8.166676 | 6.630101 | 0.003439 | 0.027988 | 8.544691 | 8.135201 | 8.092722 |
| ILMN_2687586 | Cxcl16    | -0.63451 | -0.04923 | -0.25147 | -0.20223 | 10.00037 | 6.627966 | 0.003444 | 0.028015 | 10.23418 | 9.599668 | 10.18494 |
| ILMN_1235494 | Tmem9     | -0.73793 | -0.26401 | -0.44288 | -0.17886 | 7.824728 | 6.627037 | 0.003446 | 0.028019 | 8.185933 | 7.448007 | 7.921919 |
| ILMN_3061070 | Slc25a20  | 0.266001 | 0.257821 | -0.54281 | -0.80063 | 8.828325 | 6.623609 | 0.003454 | 0.028071 | 8.833072 | 9.099073 | 9.090893 |
| ILMN_1253355 | 2810021BC | -0.72841 | -0.47357 | -0.24686 | 0.226703 | 6.33304  | 6.622363 | 0.003457 | 0.028081 | 6.695251 | 5.966838 | 6.221684 |
| ILMN_2637757 | Hlx1      | 0.180922 | 0.321538 | 0.833993 | 0.512455 | 6.131721 | 6.617101 | 0.003469 | 0.028168 | 5.797608 | 5.97853  | 6.119146 |
| ILMN_2955104 | Naca      | -0.70329 | -0.74237 | -0.56874 | 0.173624 | 11.71722 | 6.614848 | 0.003474 | 0.028184 | 12.22082 | 11.51754 | 11.47846 |
| ILMN_2668289 | N6amt1    | -0.70919 | -0.48847 | -0.5103  | -0.02182 | 7.927301 | 6.614365 | 0.003476 | 0.028184 | 8.354291 | 7.645102 | 7.865816 |
| ILMN_2722678 | Grcc10    | -0.74855 | -0.41251 | -0.43849 | -0.02598 | 9.780596 | 6.6142   | 0.003476 | 0.028184 | 10.18048 | 9.431934 | 9.767974 |
| ILMN_2749556 | Mucdhl    | 0.306481 | 0.337702 | 0.470462 | 0.132761 | 13.95429 | 6.6125   | 0.00348  | 0.028203 | 13.67563 | 13.98211 | 14.01333 |
| ILMN_1226838 | Sepm      | -0.69516 | -0.34881 | -0.25292 | 0.095887 | 7.216104 | 6.610334 | 0.003485 | 0.028206 | 7.540327 | 6.845168 | 7.191516 |
| ILMN_2502623 | Zhx3      | 0.771928 | 0.533992 | 0.49285  | -0.04114 | 6.178549 | 6.610263 | 0.003485 | 0.028206 | 5.728857 | 6.500785 | 6.262849 |
| ILMN_2744380 | Npc2      | -0.80908 | -0.68461 | -0.867   | -0.1824  | 7.117989 | 6.609351 | 0.003487 | 0.028206 | 7.708162 | 6.899082 | 7.023553 |
| ILMN_1221624 | Slc35b3   | -0.61716 | -0.26314 | -0.28021 | -0.01707 | 10.75228 | 6.609102 | 0.003488 | 0.028206 | 11.0424  | 10.42524 | 10.77926 |
| ILMN_2880067 | Ndufa8    | -0.19377 | -0.34743 | -0.46404 | -0.11661 | 12.08702 | 6.608867 | 0.003489 | 0.028206 | 12.33833 | 12.14457 | 11.9909  |
| ILMN_1235932 | Pdgfra    | -0.73589 | -0.01625 | 0.309484 | 0.325738 | 8.036387 | 6.608115 | 0.00349  | 0.028208 | 8.147053 | 7.41116  | 8.130799 |
| ILMN_2978570 | Prpf38a   | -0.6978  | -0.40559 | -0.3491  | 0.056488 | 9.016906 | 6.602573 | 0.003503 | 0.0283   | 9.380028 | 8.682229 | 8.97444  |
| ILMN_1242418 | Ptk6      | -1.86393 | -1.67484 | -0.56939 | 1.105451 | 6.43725  | 6.599617 | 0.00351  | 0.02834  | 7.464289 | 5.600356 | 5.789453 |
| ILMN_2700699 | Lrrc28    | 0.616209 | 0.501483 | 0.539155 | 0.037672 | 7.809238 | 6.598917 | 0.003512 | 0.02834  | 7.395026 | 8.011235 | 7.896509 |
| ILMN_2955356 | Appbp1    | -0.4617  | -0.3547  | -0.36985 | -0.01515 | 10.4129  | 6.598442 | 0.003513 | 0.02834  | 10.70947 | 10.24777 | 10.35476 |
| ILMN_2872698 | Trak2     | -0.13741 | 0.310401 | 0.472451 | 0.162051 | 8.683858 | 6.596921 | 0.003517 | 0.028356 | 8.522498 | 8.385086 | 8.832898 |
| ILMN_1222441 | Gsg1      | -0.83908 | -0.34865 | -0.47571 | -0.12706 | 6.101465 | 6.595406 | 0.00352  | 0.028368 | 6.517326 | 5.678242 | 6.168676 |
| ILMN_2696110 | 2900041AC | -0.88076 | -0.619   | -0.36588 | 0.253118 | 6.033496 | 6.594274 | 0.003523 | 0.028368 | 6.499907 | 5.61915  | 5.880905 |
| ILMN_2757489 | Ppp1r11   | -0.59645 | -0.3174  | -0.48602 | -0.16862 | 10.83466 | 6.594214 | 0.003523 | 0.028368 | 11.18463 | 10.58818 | 10.86723 |
| ILMN_2855590 | BC019977  | 0.296443 | 0.65046  | 0.821893 | 0.171432 | 9.824134 | 6.593481 | 0.003525 | 0.028369 | 9.381935 | 9.678378 | 10.0324  |
| ILMN_2848353 | Zfp771    | -0.75892 | -0.20265 | -0.37275 | -0.1701  | 6.890627 | 6.592143 | 0.003528 | 0.02837  | 7.224205 | 6.465289 | 7.021554 |
| ILMN_2913432 | Defb37    | -0.74923 | -0.83084 | -0.96367 | -0.13283 | 5.251647 | 6.592008 | 0.003528 | 0.02837  | 5.887584 | 5.138354 | 5.056739 |
| ILMN_1215893 | Alg3      | 0.547911 | 0.218713 | 0.216392 | -0.00232 | 7.275742 | 6.590784 | 0.003531 | 0.02837  | 7.029988 | 7.577899 | 7.248701 |
| ILMN_2801683 | Dstn      | -0.44516 | -0.40992 | -0.13463 | 0.275286 | 12.63059 | 6.590711 | 0.003532 | 0.02837  | 12.87802 | 12.43286 | 12.4681  |
| ILMN_1220943 | Nup37     | 0.006904 | -0.5885  | -0.56112 | 0.02738  | 6.045932 | 6.581709 | 0.003553 | 0.028524 | 6.331611 | 6.338515 | 5.743112 |
| ILMN_1217296 | Cops7a    | -0.17679 | -0.3349  | -0.56303 | -0.22813 | 8.58004  | 6.581325 | 0.003554 | 0.028524 | 8.84872  | 8.671933 | 8.513819 |

|              |           |          |          |          |          |          |          |          |          |          |          |          |
|--------------|-----------|----------|----------|----------|----------|----------|----------|----------|----------|----------|----------|----------|
| ILMN_1246695 | Ase1      | 0.506972 | -0.15421 | -0.12465 | 0.029564 | 6.89754  | 6.579501 | 0.003558 | 0.028546 | 6.840513 | 7.347485 | 6.686299 |
| ILMN_2732827 | Snrpa1    | -0.26335 | -0.50409 | -0.7374  | -0.23331 | 8.976777 | 6.578491 | 0.003561 | 0.028552 | 9.352988 | 9.089642 | 8.848894 |
| ILMN_2740134 | ldh3a     | 0.425812 | -0.06768 | 0.089941 | 0.157618 | 9.441871 | 6.573625 | 0.003573 | 0.02862  | 9.329852 | 9.755664 | 9.262176 |
| ILMN_3082580 | Azi2      | -0.43764 | -0.25162 | -0.41896 | -0.16735 | 8.223983 | 6.573545 | 0.003573 | 0.02862  | 8.501039 | 8.063396 | 8.249422 |
| ILMN_2431150 | Eef2k     | 0.854627 | 0.201778 | 0.889043 | 0.687265 | 5.694934 | 6.572738 | 0.003575 | 0.02862  | 5.208572 | 6.063199 | 5.41035  |
| ILMN_1250924 | 2810022L2 | -0.40797 | -0.47078 | -0.74279 | -0.27201 | 5.231587 | 6.571499 | 0.003578 | 0.02862  | 5.636973 | 5.228998 | 5.166195 |
| ILMN_2681186 | Rab7l1    | -0.61211 | -0.29516 | -0.47492 | -0.17975 | 7.496021 | 6.57129  | 0.003578 | 0.02862  | 7.841568 | 7.22946  | 7.546405 |
| ILMN_2720663 | BC026645  | -0.66939 | -0.60172 | -0.40993 | 0.191783 | 6.609649 | 6.570896 | 0.003579 | 0.02862  | 7.02991  | 6.360518 | 6.428193 |
| ILMN_2718330 | Cish      | -0.5982  | -0.36709 | 0.044562 | 0.411648 | 8.616098 | 6.563508 | 0.003597 | 0.02875  | 8.846278 | 8.248081 | 8.479192 |
| ILMN_1220609 | Ltb4r1    | 0.784661 | 0.735992 | 0.957286 | 0.221294 | 7.838787 | 6.55926  | 0.003607 | 0.02882  | 7.219302 | 8.003963 | 7.955294 |
| ILMN_3109491 | 6430527G1 | 0.240233 | 0.103087 | 0.645678 | 0.542591 | 8.254339 | 6.558015 | 0.00361  | 0.028831 | 8.00709  | 8.247323 | 8.110177 |
| ILMN_2481133 | Tnni2     | -0.79306 | -0.51027 | -0.83178 | -0.32151 | 6.236543 | 6.55425  | 0.00362  | 0.02888  | 6.770321 | 5.977261 | 6.260049 |
| ILMN_2761430 | Rab6b     | 0.111736 | 0.571027 | 0.824828 | 0.253801 | 6.135192 | 6.553878 | 0.003621 | 0.02888  | 5.758294 | 5.87003  | 6.329321 |
| ILMN_2608174 | Tmem143   | 0.446095 | 0.064272 | -0.14326 | -0.20753 | 5.029598 | 6.553461 | 0.003622 | 0.02888  | 4.937822 | 5.383917 | 5.002093 |
| ILMN_2668849 | 3632413BC | 0.795051 | 0.692097 | 0.980818 | 0.288721 | 6.052885 | 6.552649 | 0.003624 | 0.028881 | 5.435893 | 6.230944 | 6.12799  |
| ILMN_2625188 | 2810422O1 | -0.68658 | -0.79404 | -0.72559 | 0.068445 | 5.932884 | 6.552084 | 0.003625 | 0.028881 | 6.484436 | 5.797854 | 5.690401 |
| ILMN_2596903 | Luzp1     | 0.601112 | 0.425464 | 0.795383 | 0.369919 | 5.433732 | 6.541934 | 0.00365  | 0.029054 | 4.978243 | 5.579354 | 5.403707 |
| ILMN_1239397 | Hk2       | 0.332126 | 0.129803 | 0.671258 | 0.541455 | 8.365034 | 6.541929 | 0.00365  | 0.029054 | 8.081737 | 8.413863 | 8.21154  |
| ILMN_1227235 | Timm13a   | -0.65488 | -0.7181  | -0.84388 | -0.12578 | 8.202808 | 6.538624 | 0.003658 | 0.029089 | 8.757023 | 8.102139 | 8.038926 |
| ILMN_2596569 | 1700113I2 | -0.77303 | -0.64819 | -0.76756 | -0.11937 | 5.353565 | 6.537196 | 0.003662 | 0.029089 | 5.900761 | 5.127731 | 5.252568 |
| ILMN_2658687 | Ltc4s     | 0.658871 | 1.193245 | 0.030951 | -1.16229 | 8.272467 | 6.536832 | 0.003663 | 0.029089 | 7.8017   | 8.460572 | 8.994945 |
| ILMN_1236958 | Gabarapl1 | 0.049412 | 0.64951  | 0.452867 | -0.19664 | 8.400831 | 6.536699 | 0.003663 | 0.029089 | 8.112884 | 8.162296 | 8.762394 |
| ILMN_2759365 | Angptl4   | 1.308094 | 1.152221 | 0.266939 | -0.88528 | 10.47073 | 6.536561 | 0.003663 | 0.029089 | 9.788921 | 11.09701 | 10.94114 |
| ILMN_3116614 | Timm9     | -0.48344 | -0.49682 | -0.81752 | -0.3207  | 7.888724 | 6.536077 | 0.003665 | 0.029089 | 8.33817  | 7.854728 | 7.841349 |
| ILMN_2613601 | 2010001M  | -1.33034 | -1.0117  | -0.94516 | 0.066543 | 9.688828 | 6.535217 | 0.003667 | 0.029093 | 10.51063 | 9.180288 | 9.498928 |
| ILMN_2733888 | Skp1a     | -0.6886  | -0.55016 | -0.57738 | -0.02722 | 7.376524 | 6.533513 | 0.003671 | 0.029113 | 7.83056  | 7.14196  | 7.280399 |
| ILMN_2707198 | As3mt     | 0.587059 | 0.130736 | -0.0603  | -0.19104 | 6.873608 | 6.532352 | 0.003674 | 0.029123 | 6.709234 | 7.296293 | 6.83997  |
| ILMN_1252849 | 4732433M  | 0.662897 | 0.121054 | -0.09171 | -0.21276 | 11.04842 | 6.531154 | 0.003677 | 0.029133 | 10.87536 | 11.53826 | 10.99641 |
| ILMN_1234824 | 2610001E1 | -1.15942 | 0.109303 | 0.057771 | -0.05153 | 6.25712  | 6.530073 | 0.00368  | 0.029142 | 6.505205 | 5.345789 | 6.614508 |
| ILMN_2715201 | Golga2    | 0.423847 | 0.555941 | 0.767222 | 0.211281 | 8.254595 | 6.520803 | 0.003703 | 0.029312 | 7.817842 | 8.241689 | 8.373784 |
| ILMN_2691187 | Rbbp7     | 0.65795  | -0.29217 | -0.33419 | -0.04202 | 8.720202 | 6.519564 | 0.003706 | 0.029322 | 8.712305 | 9.370255 | 8.420134 |
| ILMN_1218384 | 1110019L2 | 0.566668 | 0.440312 | 1.055412 | 0.6151   | 5.749114 | 6.518961 | 0.003707 | 0.029322 | 5.233516 | 5.800184 | 5.673828 |
| ILMN_2681946 | Mrps11    | -0.03982 | -0.08136 | -0.48691 | -0.40556 | 8.922606 | 6.516249 | 0.003714 | 0.029363 | 9.074629 | 9.034807 | 8.993273 |
| ILMN_1225712 | lap       | -0.46277 | 0.047534 | 0.159261 | 0.111727 | 11.34775 | 6.511994 | 0.003725 | 0.029434 | 11.41174 | 10.94897 | 11.45928 |
| ILMN_3158135 | Sema6b    | 0.672003 | 0.411953 | 0.63846  | 0.226507 | 5.291281 | 6.509365 | 0.003732 | 0.029474 | 4.860677 | 5.532681 | 5.27263  |

|              |           |          |          |          |          |          |          |          |          |          |          |          |
|--------------|-----------|----------|----------|----------|----------|----------|----------|----------|----------|----------|----------|----------|
| ILMN_2850527 | Thoc1     | -0.09619 | -0.27097 | -0.56528 | -0.2943  | 7.397621 | 6.5072   | 0.003737 | 0.029504 | 7.630732 | 7.534539 | 7.359758 |
| ILMN_2732536 | Dctn5     | 0.414822 | 0.246577 | 0.375231 | 0.128655 | 10.22445 | 6.499592 | 0.003756 | 0.029643 | 9.965297 | 10.38012 | 10.21187 |
| ILMN_3001598 | Ptpn11    | 0.607854 | 0.474392 | 0.760383 | 0.285991 | 10.4342  | 6.489716 | 0.003782 | 0.02983  | 9.973543 | 10.5814  | 10.44794 |
| ILMN_2668472 | Nr1h3     | -0.71101 | -0.48569 | -0.91878 | -0.43309 | 7.023935 | 6.488912 | 0.003784 | 0.029832 | 7.552806 | 6.841795 | 7.067114 |
| ILMN_2895213 | Lrrc8a    | 0.649848 | 0.477101 | 0.629786 | 0.152685 | 7.308724 | 6.481844 | 0.003802 | 0.029963 | 6.869541 | 7.519389 | 7.346641 |
| ILMN_2883414 | Cenpl     | -0.57931 | -0.39454 | -0.55453 | -0.15999 | 9.661682 | 6.478331 | 0.003811 | 0.030018 | 10.04378 | 9.464466 | 9.64924  |
| ILMN_2716511 | Slc12a6   | 0.437723 | 0.653432 | 0.382106 | -0.27133 | 8.760777 | 6.477799 | 0.003813 | 0.030018 | 8.392462 | 8.830185 | 9.045894 |
| ILMN_1227925 | Dctn3     | -0.44195 | -0.43839 | -0.64726 | -0.20887 | 10.49062 | 6.476757 | 0.003815 | 0.030026 | 10.87252 | 10.43057 | 10.43413 |
| ILMN_1256682 | 2610304GC | 0.601286 | 0.215643 | 0.485948 | 0.270305 | 6.159419 | 6.475867 | 0.003818 | 0.030003 | 5.8337   | 6.434986 | 6.049343 |
| ILMN_2734391 | Ramp1     | -1.06191 | -0.8207  | -0.94086 | -0.12016 | 8.471224 | 6.474874 | 0.00382  | 0.030036 | 9.177089 | 8.115182 | 8.356392 |
| ILMN_2694153 | Ddef1     | 0.105541 | 0.510497 | 0.782758 | 0.272261 | 7.352084 | 6.473215 | 0.003825 | 0.030036 | 7.002385 | 7.107926 | 7.512882 |
| ILMN_2640742 | Hip2      | 0.259959 | -0.07368 | -0.28136 | -0.20769 | 9.576168 | 6.472949 | 0.003825 | 0.030036 | 9.599939 | 9.859897 | 9.526262 |
| ILMN_1243095 | Vbp1      | -1.1907  | -0.77903 | -0.71687 | 0.062157 | 5.997943 | 6.472436 | 0.003827 | 0.030036 | 6.669594 | 5.478889 | 5.890567 |
| ILMN_2634222 | Efs       | -0.32958 | 0.362082 | 0.468143 | 0.106061 | 5.516927 | 6.472307 | 0.003827 | 0.030036 | 5.391767 | 5.062182 | 5.753849 |
| ILMN_2612973 | Sult1c2   | 0.334663 | -0.69538 | -0.85243 | -0.15706 | 6.085866 | 6.47049  | 0.003832 | 0.030059 | 6.389153 | 6.723816 | 5.693775 |
| ILMN_2994380 | Nat2      | -0.73557 | -0.58285 | -0.55549 | 0.027355 | 9.78216  | 6.46819  | 0.003838 | 0.030093 | 10.25064 | 9.515064 | 9.667792 |
| ILMN_3158668 | Pde6d     | -0.60313 | -0.46641 | -0.38279 | 0.083616 | 8.254209 | 6.466119 | 0.003843 | 0.030122 | 8.617293 | 8.014164 | 8.150882 |
| ILMN_2711966 | Mrpl1     | -0.60991 | -0.42256 | -0.50607 | -0.08352 | 9.591825 | 6.464945 | 0.003846 | 0.030132 | 9.976459 | 9.366553 | 9.553904 |
| ILMN_1233153 | Psemb7    | -0.27107 | -0.3034  | -0.4865  | -0.1831  | 10.7273  | 6.462161 | 0.003853 | 0.030173 | 10.99254 | 10.72147 | 10.68914 |
| ILMN_3150677 | Sprr2a    | -1.30986 | -1.32902 | -0.48197 | 0.847047 | 7.269181 | 6.461626 | 0.003855 | 0.030173 | 8.049395 | 6.739534 | 6.720373 |
| ILMN_2700982 | Pecam1    | 0.412437 | 0.652889 | 0.731048 | 0.07816  | 6.899514 | 6.458846 | 0.003862 | 0.030195 | 6.450421 | 6.862858 | 7.103309 |
| ILMN_2760415 | Abcf1     | 0.700371 | 0.094599 | 0.113786 | 0.019187 | 7.316486 | 6.45855  | 0.003863 | 0.030195 | 7.089297 | 7.789668 | 7.183896 |
| ILMN_2610973 | Clock     | 0.329093 | 0.362861 | 0.559491 | 0.19663  | 9.354703 | 6.457244 | 0.003866 | 0.030195 | 9.041842 | 9.370935 | 9.404703 |
| ILMN_2850839 | Supt4h2   | -0.50934 | -0.21853 | -0.51432 | -0.29579 | 11.30709 | 6.456958 | 0.003867 | 0.030195 | 11.61764 | 11.1083  | 11.39911 |
| ILMN_2834370 | Cutc      | -0.63065 | -0.47258 | -0.3871  | 0.085482 | 8.396916 | 6.455597 | 0.003871 | 0.030195 | 8.769499 | 8.138852 | 8.296915 |
| ILMN_2604467 | 061002701 | -0.5555  | -0.1962  | -0.62879 | -0.4326  | 8.612295 | 6.455436 | 0.003871 | 0.030195 | 8.957417 | 8.401915 | 8.761221 |
| ILMN_1233848 | LOC381795 | -0.66324 | -0.49995 | -0.70993 | -0.20997 | 7.004497 | 6.455062 | 0.003872 | 0.030195 | 7.472777 | 6.809533 | 6.972826 |
| ILMN_2602257 | 2010300G1 | -0.64864 | -0.47689 | -0.41776 | 0.059138 | 9.369403 | 6.454819 | 0.003873 | 0.030195 | 9.755225 | 9.106586 | 9.278332 |
| ILMN_2932722 | Zfp472    | -0.69631 | -0.46708 | -0.35234 | 0.114742 | 6.776746 | 6.454675 | 0.003873 | 0.030195 | 7.155677 | 6.459369 | 6.688599 |
| ILMN_2630428 | 3830422N1 | -2.13392 | -1.53656 | -0.92251 | 0.614042 | 5.604652 | 6.452278 | 0.00388  | 0.03022  | 6.7529   | 4.618976 | 5.216345 |
| ILMN_2919786 | Erh       | -0.60803 | -0.45573 | -0.53368 | -0.07796 | 11.51475 | 6.451304 | 0.003882 | 0.03022  | 11.91411 | 11.30608 | 11.45838 |
| ILMN_2768026 | Gusb      | 0.851943 | 0.550368 | 0.583145 | 0.032777 | 6.161294 | 6.451141 | 0.003883 | 0.03022  | 5.66493  | 6.516873 | 6.215298 |
| ILMN_2744587 | Cib2      | -0.83888 | -0.2091  | -0.36933 | -0.16022 | 7.806009 | 6.450804 | 0.003883 | 0.03022  | 8.160335 | 7.321456 | 7.951234 |
| ILMN_2895862 | Psemb6    | -0.37244 | -0.22229 | -0.48477 | -0.26248 | 11.60481 | 6.449737 | 0.003886 | 0.030229 | 11.87468 | 11.50225 | 11.65239 |
| ILMN_2723631 | Hint1     | -0.56438 | -0.24636 | -0.35022 | -0.10385 | 12.93168 | 6.448959 | 0.003888 | 0.030231 | 13.22192 | 12.65755 | 12.97556 |



|              |            |          |          |          |          |          |          |          |          |          |          |          |
|--------------|------------|----------|----------|----------|----------|----------|----------|----------|----------|----------|----------|----------|
| ILMN_2800297 | Sart3      | 0.466832 | 0.095692 | 0.438408 | 0.342716 | 8.9739   | 6.442344 | 0.003906 | 0.030352 | 8.723667 | 9.190499 | 8.819359 |
| ILMN_2968731 | Nqo2       | -0.30417 | -0.39275 | -0.64819 | -0.25544 | 9.419141 | 6.441707 | 0.003908 | 0.030352 | 9.755419 | 9.451248 | 9.362666 |
| ILMN_1226528 | Kctd2      | 0.215877 | 0.057107 | 0.55899  | 0.501882 | 8.110572 | 6.441144 | 0.003909 | 0.030352 | 7.902579 | 8.118456 | 7.959686 |
| ILMN_3033823 | Brsk2      | -0.63984 | -0.4622  | -0.58568 | -0.12348 | 4.841979 | 6.437995 | 0.003918 | 0.030404 | 5.263909 | 4.624069 | 4.801711 |
| ILMN_1247636 | Ndfip2     | -1.1169  | -1.15981 | -0.55922 | 0.600591 | 8.363952 | 6.433455 | 0.00393  | 0.030481 | 9.072933 | 7.956038 | 7.913123 |
| ILMN_2940642 | St6galnac2 | 0.493041 | 0.493048 | 0.548616 | 0.055568 | 10.42071 | 6.432459 | 0.003932 | 0.030481 | 10.03704 | 10.53008 | 10.53008 |
| ILMN_2804487 | Aif1       | -0.55495 | -0.01706 | -0.09684 | -0.07978 | 7.545636 | 6.432348 | 0.003933 | 0.030481 | 7.712849 | 7.157898 | 7.695787 |
| ILMN_3155180 | Itpr2      | 0.123803 | 0.222057 | 0.655749 | 0.433692 | 7.450768 | 6.431488 | 0.003935 | 0.030485 | 7.200366 | 7.324168 | 7.422423 |
| ILMN_2717916 | Mrps18a    | -0.39984 | -0.38215 | -0.54527 | -0.16312 | 9.817247 | 6.430346 | 0.003938 | 0.030495 | 10.14906 | 9.749221 | 9.766914 |
| ILMN_3153285 | Evi2a      | -0.776   | -0.75645 | -0.54663 | 0.20982  | 5.371538 | 6.429706 | 0.00394  | 0.030495 | 5.891307 | 5.115306 | 5.13486  |
| ILMN_1258515 | Paip2      | -1.02805 | -0.55524 | -0.3019  | 0.25334  | 6.345241 | 6.429027 | 0.003942 | 0.030496 | 6.816537 | 5.788485 | 6.261301 |
| ILMN_2497616 | Uqcrb      | -0.54425 | -0.51952 | -0.63295 | -0.11344 | 9.904266 | 6.426696 | 0.003948 | 0.030517 | 10.32845 | 9.784197 | 9.808929 |
| ILMN_1240716 | 5730466H2  | -0.64601 | -0.39437 | -0.38331 | 0.011059 | 7.322051 | 6.426529 | 0.003948 | 0.030517 | 7.677975 | 7.031964 | 7.283602 |
| ILMN_2759114 | Cklfsf4    | -0.59016 | -0.14677 | -0.57682 | -0.43005 | 8.470478 | 6.426061 | 0.00395  | 0.030517 | 8.798916 | 8.20876  | 8.652143 |
| ILMN_2767791 | D15Ertd78  | 0.129256 | 0.317257 | 0.539635 | 0.222378 | 10.574   | 6.425139 | 0.003952 | 0.030523 | 10.32746 | 10.45672 | 10.64472 |
| ILMN_2454307 | Ap3m1      | 0.564747 | 0.15576  | 0.328472 | 0.172712 | 5.716864 | 6.421855 | 0.003961 | 0.030578 | 5.45462  | 6.019367 | 5.610379 |
| ILMN_2682321 | Armc6      | -0.44276 | -0.64395 | -0.791   | -0.14705 | 6.105768 | 6.416414 | 0.003976 | 0.030667 | 6.575192 | 6.132437 | 5.931245 |
| ILMN_1217043 | Got1       | 0.908061 | 0.187252 | 0.081461 | -0.10579 | 6.74862  | 6.416315 | 0.003976 | 0.030667 | 6.454427 | 7.362488 | 6.641679 |
| ILMN_2640570 | Pak4       | 0.591264 | 0.401767 | 0.623672 | 0.221905 | 9.559372 | 6.414507 | 0.003981 | 0.030691 | 9.155196 | 9.74646  | 9.556963 |
| ILMN_2916489 | Pbx2       | -0.27243 | 0.154604 | 0.294345 | 0.139742 | 6.636455 | 6.411896 | 0.003988 | 0.030733 | 6.592324 | 6.319899 | 6.746928 |
| ILMN_1222165 | Tes3       | -0.74989 | -0.86922 | -0.6354  | 0.233814 | 5.353547 | 6.410473 | 0.003992 | 0.030749 | 5.917175 | 5.167284 | 5.047959 |
| ILMN_1242829 | Prdx2      | -0.41374 | -0.41046 | -0.82341 | -0.41295 | 6.113908 | 6.408547 | 0.003997 | 0.030776 | 6.525809 | 6.11207  | 6.11535  |
| ILMN_1236906 | D11Ertd49  | -0.54504 | -0.36454 | -0.3524  | 0.012135 | 9.467896 | 6.402622 | 0.004014 | 0.030887 | 9.783393 | 9.238349 | 9.418855 |
| ILMN_1252110 | Foxj2      | 0.374121 | 0.641001 | 0.848457 | 0.207457 | 6.903055 | 6.401527 | 0.004017 | 0.030897 | 6.43716  | 6.811281 | 7.078161 |
| ILMN_2433318 | Greb1      | 0.805481 | 0.37764  | 0.757914 | 0.380274 | 5.58153  | 6.400574 | 0.004019 | 0.030903 | 5.096272 | 5.901753 | 5.473912 |
| ILMN_2789900 | Cd177      | -0.89618 | -0.82176 | -0.36477 | 0.456992 | 5.781795 | 6.393323 | 0.004039 | 0.031032 | 6.302473 | 5.406291 | 5.480713 |
| ILMN_2832886 | Foxred1    | -0.25439 | -0.31484 | -0.59984 | -0.285   | 6.539943 | 6.39276  | 0.004041 | 0.031032 | 6.832213 | 6.577822 | 6.517369 |
| ILMN_2878021 | Atp2b1     | 0.742943 | 0.607451 | 0.364924 | -0.24253 | 6.761169 | 6.392558 | 0.004041 | 0.031032 | 6.332339 | 7.075282 | 6.93979  |
| ILMN_1246495 | Tmem9b     | -0.56812 | -0.53049 | -0.63898 | -0.10849 | 8.738558 | 6.390884 | 0.004046 | 0.031054 | 9.172956 | 8.604832 | 8.642469 |
| ILMN_2798086 | Fchsd2     | 0.900252 | 0.630273 | 0.512736 | -0.11754 | 10.24836 | 6.390233 | 0.004048 | 0.031055 | 9.737544 | 10.6378  | 10.36782 |
| ILMN_2635232 | Rab6ip1    | -0.00212 | 0.664699 | 0.840546 | 0.175847 | 7.790229 | 6.386371 | 0.004058 | 0.031123 | 7.414448 | 7.412327 | 8.079147 |
| ILMN_1235499 | Pros1      | 0.528347 | 0.666925 | 0.526196 | -0.14073 | 9.071034 | 6.384804 | 0.004063 | 0.031143 | 8.640667 | 9.169013 | 9.307592 |
| ILMN_2635348 | 682044910  | -0.85505 | -0.4443  | -0.18096 | 0.263344 | 6.69344  | 6.381189 | 0.004073 | 0.031207 | 7.063516 | 6.20847  | 6.619214 |
| ILMN_2616226 | Dbp        | 1.286854 | 0.040524 | -0.06102 | -0.10154 | 10.34722 | 6.378902 | 0.004079 | 0.031242 | 10.03063 | 11.31748 | 10.07115 |
| ILMN_2884610 | Ppapdc1    | -0.08685 | 0.50605  | -0.19451 | -0.70057 | 8.77127  | 6.374846 | 0.004091 | 0.031315 | 8.715098 | 8.628251 | 9.221148 |

|              |           |          |          |          |          |          |          |          |          |          |          |          |
|--------------|-----------|----------|----------|----------|----------|----------|----------|----------|----------|----------|----------|----------|
| ILMN_1258867 | Pex5      | 0.655465 | 0.501234 | 0.329564 | -0.17167 | 7.679046 | 6.372686 | 0.004097 | 0.031348 | 7.30748  | 7.962945 | 7.808714 |
| ILMN_2780352 | D630014A  | 0.639352 | 0.82657  | 0.542833 | -0.28374 | 7.248026 | 6.36878  | 0.004108 | 0.031418 | 6.745837 | 7.385189 | 7.572407 |
| ILMN_1227712 | 5730436H2 | 0.008503 | -0.30043 | -0.54677 | -0.24634 | 8.564605 | 6.366273 | 0.004115 | 0.031458 | 8.774278 | 8.782781 | 8.473851 |
| ILMN_1247404 | B230312I1 | -0.85037 | -0.19437 | -0.36786 | -0.17349 | 6.110774 | 6.3647   | 0.004119 | 0.031479 | 6.463923 | 5.613553 | 6.269556 |
| ILMN_1216781 | Rab11fip5 | 0.367565 | 0.953281 | 1.031667 | 0.078386 | 6.366486 | 6.361643 | 0.004128 | 0.031524 | 5.778357 | 6.145923 | 6.731639 |
| ILMN_2605212 | Slc6a8    | 0.489041 | 0.537168 | 0.769321 | 0.232153 | 12.35048 | 6.361348 | 0.004129 | 0.031524 | 11.9016  | 12.39064 | 12.43877 |
| ILMN_2837189 | 6720467CC | -0.7712  | -0.40407 | -0.35925 | 0.044825 | 7.647773 | 6.359471 | 0.004134 | 0.03155  | 8.031403 | 7.260203 | 7.62733  |
| ILMN_1221835 | Tubb2b    | 0.43898  | -0.20574 | -0.28204 | -0.0763  | 5.344293 | 6.357029 | 0.004141 | 0.03159  | 5.356493 | 5.795473 | 5.150751 |
| ILMN_2628672 | Mrpl49    | -0.36225 | -0.32255 | -0.65901 | -0.33647 | 6.612006 | 6.354547 | 0.004148 | 0.031621 | 6.94796  | 6.585705 | 6.625414 |
| ILMN_1260073 | D16Ertd47 | 0.195139 | 0.358048 | 0.688554 | 0.330506 | 6.396763 | 6.354311 | 0.004149 | 0.031621 | 6.086328 | 6.281467 | 6.444376 |
| ILMN_2588050 | Ubc       | 0.648738 | 0.411681 | 0.50137  | 0.089689 | 12.91685 | 6.352681 | 0.004153 | 0.031632 | 12.5264  | 13.17514 | 12.93808 |
| ILMN_1250103 | Tle2      | 0.07494  | 0.330714 | 0.434238 | 0.103524 | 4.798499 | 6.35255  | 0.004154 | 0.031632 | 4.588526 | 4.663466 | 4.91924  |
| ILMN_2820559 | D8Ertd738 | -0.59576 | -0.2807  | -0.37066 | -0.08996 | 10.74082 | 6.34796  | 0.004167 | 0.031718 | 11.0526  | 10.45684 | 10.7719  |
| ILMN_2859558 | Insm1     | 0.755264 | 0.165294 | -0.09518 | -0.26047 | 5.563148 | 6.345424 | 0.004174 | 0.031753 | 5.356803 | 6.112068 | 5.522097 |
| ILMN_2648580 | 1500032L2 | -0.49383 | -0.25424 | -0.31048 | -0.05624 | 12.51493 | 6.345082 | 0.004175 | 0.031753 | 12.77956 | 12.28573 | 12.52532 |
| ILMN_2678576 | Numb      | 1.004203 | 0.781424 | 0.551924 | -0.2295  | 6.321141 | 6.343942 | 0.004178 | 0.031764 | 5.736753 | 6.740956 | 6.518177 |
| ILMN_2960044 | BC013476  | 2.211242 | 2.11695  | 0.321973 | -1.79498 | 5.656082 | 6.342689 | 0.004182 | 0.031766 | 4.493541 | 6.704783 | 6.610491 |
| ILMN_2601519 | Abp1      | 0.410576 | 0.648129 | 0.678997 | 0.030869 | 13.24705 | 6.342572 | 0.004182 | 0.031766 | 12.81262 | 13.2232  | 13.46075 |
| ILMN_3060442 | Dnajb6    | 0.253694 | 0.291036 | 0.559672 | 0.268636 | 8.18861  | 6.336565 | 0.0042   | 0.031884 | 7.91251  | 8.166204 | 8.203546 |
| ILMN_1250767 | Tpd52l2   | -0.74132 | -0.34173 | -0.5349  | -0.19317 | 7.398268 | 6.331821 | 0.004213 | 0.031966 | 7.802755 | 7.061431 | 7.461028 |
| ILMN_2519673 | Vwf       | 0.84933  | 0.789905 | 0.993128 | 0.203222 | 7.046889 | 6.331553 | 0.004214 | 0.031966 | 6.388798 | 7.238128 | 7.178703 |
| ILMN_2595383 | Cog8      | 0.451608 | 0.243509 | 0.438348 | 0.19484  | 9.435905 | 6.327515 | 0.004226 | 0.032036 | 9.152539 | 9.604147 | 9.396047 |
| ILMN_2772155 | Adam19    | 0.454239 | 0.499886 | 0.789115 | 0.289229 | 6.39552  | 6.32674  | 0.004228 | 0.032036 | 5.95971  | 6.413949 | 6.459596 |
| ILMN_1243395 | Wbscr1    | 0.425222 | 0.251556 | 0.47223  | 0.220674 | 12.59258 | 6.325507 | 0.004232 | 0.032036 | 12.30533 | 12.73055 | 12.55688 |
| ILMN_2965399 | Igsf11    | 0.067322 | 0.405778 | 0.341953 | -0.06382 | 4.846677 | 6.325472 | 0.004232 | 0.032036 | 4.642914 | 4.710236 | 5.048691 |
| ILMN_2602406 | 2810004N2 | -0.69447 | -0.45672 | -0.63773 | -0.181   | 10.65415 | 6.325221 | 0.004233 | 0.032036 | 11.10138 | 10.40691 | 10.64465 |
| ILMN_2620233 | Fmo5      | 0.975418 | 0.554552 | 0.26564  | -0.28891 | 6.347985 | 6.322118 | 0.004242 | 0.032091 | 5.899082 | 6.8745   | 6.453634 |
| ILMN_2666070 | Tacr2     | 0.032509 | 0.654668 | 0.61395  | -0.04072 | 5.209715 | 6.320258 | 0.004247 | 0.032118 | 4.884433 | 4.916942 | 5.539101 |
| ILMN_2701515 | Lrrk1     | 0.613945 | 0.313018 | 0.39323  | 0.080213 | 8.037175 | 6.319109 | 0.004251 | 0.032129 | 7.707127 | 8.321071 | 8.020144 |
| ILMN_2862338 | Trim40    | -1.03431 | -0.72842 | -0.63552 | 0.092905 | 8.768373 | 6.317981 | 0.004254 | 0.03214  | 9.367935 | 8.333628 | 8.639512 |
| ILMN_1244081 | Rgs4      | 0.01836  | 0.332933 | 0.501672 | 0.168739 | 6.107468 | 6.307453 | 0.004285 | 0.03236  | 5.894227 | 5.912586 | 6.22716  |
| ILMN_1247585 | 4921528GC | -0.73635 | -0.53649 | -0.51373 | 0.022764 | 8.149785 | 6.305752 | 0.00429  | 0.032384 | 8.596426 | 7.860077 | 8.059937 |
| ILMN_2937122 | Trak1     | 0.439106 | 0.500055 | 0.778007 | 0.277952 | 8.359429 | 6.303652 | 0.004296 | 0.0324   | 7.930136 | 8.369242 | 8.430192 |
| ILMN_2745889 | Acot2     | 1.129372 | 0.867418 | 0.386698 | -0.48072 | 5.510942 | 6.303194 | 0.004297 | 0.0324   | 4.91507  | 6.044442 | 5.782488 |
| ILMN_3159059 | Rheb      | -0.70475 | -0.58746 | -0.72863 | -0.14117 | 10.25534 | 6.303189 | 0.004297 | 0.0324   | 10.76055 | 10.05579 | 10.17309 |

|              |           |          |          |          |          |          |          |          |          |          |          |          |
|--------------|-----------|----------|----------|----------|----------|----------|----------|----------|----------|----------|----------|----------|
| ILMN_2711461 | Tgfb1     | 0.290571 | 0.494971 | 0.442611 | -0.05236 | 6.549642 | 6.300109 | 0.004307 | 0.032448 | 6.242604 | 6.533175 | 6.737575 |
| ILMN_2620131 | 1810055E1 | -0.24599 | -0.54213 | -0.5433  | -0.00117 | 5.009494 | 6.299749 | 0.004308 | 0.032448 | 5.342351 | 5.096362 | 4.800217 |
| ILMN_1222471 | Gmfg      | -0.83665 | -0.58344 | -0.85109 | -0.26765 | 8.392142 | 6.298127 | 0.004313 | 0.032468 | 8.959939 | 8.12329  | 8.376494 |
| ILMN_2960114 | Cyp27a1   | 0.413639 | 0.48949  | 0.916937 | 0.427447 | 10.01579 | 6.297625 | 0.004314 | 0.032468 | 9.560771 | 9.974411 | 10.05026 |
| ILMN_1224678 | Glt8d1    | -0.49731 | -0.56601 | -0.37961 | 0.186397 | 8.093112 | 6.296571 | 0.004317 | 0.032478 | 8.453845 | 7.956535 | 7.887836 |
| ILMN_2621304 | 241001711 | -0.86646 | -0.74692 | -0.59232 | 0.154595 | 7.620905 | 6.289413 | 0.004339 | 0.032613 | 8.172333 | 7.305868 | 7.425413 |
| ILMN_2708469 | Elmo2     | 1.186777 | 0.649925 | 0.533078 | -0.11685 | 6.310296 | 6.288763 | 0.004341 | 0.032613 | 5.717851 | 6.904628 | 6.367776 |
| ILMN_2660364 | Nudt14    | -0.8324  | -0.45535 | -0.75028 | -0.29493 | 7.287323 | 6.288676 | 0.004341 | 0.032613 | 7.796831 | 6.964426 | 7.341482 |
| ILMN_2685234 | Dhrs8     | 0.689893 | 1.151199 | 0.455732 | -0.69547 | 7.428401 | 6.287594 | 0.004344 | 0.032623 | 6.854195 | 7.544088 | 8.005394 |
| ILMN_3119914 | 2300002D1 | -0.74958 | 0.225055 | 0.515093 | 0.290038 | 8.135579 | 6.286541 | 0.004347 | 0.032633 | 8.137937 | 7.388356 | 8.362992 |
| ILMN_2455699 | Tyk2      | 0.760896 | 0.508125 | 0.492514 | -0.01561 | 5.346068 | 6.284806 | 0.004352 | 0.032658 | 4.905684 | 5.66658  | 5.413809 |
| ILMN_1220360 | Unc13b    | 0.585327 | 0.136358 | 0.60149  | 0.465132 | 8.109772 | 6.279075 | 0.00437  | 0.032761 | 7.778979 | 8.364305 | 7.915337 |
| ILMN_2632092 | Ppp1r9a   | -0.22041 | -0.16506 | 0.561033 | 0.726093 | 6.470066 | 6.278161 | 0.004372 | 0.032761 | 6.426175 | 6.205765 | 6.261115 |
| ILMN_3057482 | 4833426J0 | 0.722907 | 0.66106  | 0.897031 | 0.235971 | 5.882445 | 6.277085 | 0.004376 | 0.032761 | 5.312195 | 6.035102 | 5.973255 |
| ILMN_1240630 | Polk      | -0.65906 | -0.57376 | -0.37601 | 0.197748 | 5.00665  | 6.276898 | 0.004376 | 0.032761 | 5.408856 | 4.749797 | 4.8351   |
| ILMN_2632665 | Cav1      | -0.57917 | 0.199007 | 0.464577 | 0.26557  | 8.55121  | 6.276788 | 0.004377 | 0.032761 | 8.530106 | 7.950938 | 8.729113 |
| ILMN_1249524 | Cops5     | -0.23062 | -0.42473 | -0.59612 | -0.17139 | 9.556058 | 6.276493 | 0.004377 | 0.032761 | 9.868925 | 9.638303 | 9.444197 |
| ILMN_1240466 | Eif5      | -0.33835 | -0.3959  | -0.53811 | -0.14221 | 9.49765  | 6.27578  | 0.00438  | 0.032763 | 9.815741 | 9.477394 | 9.419839 |
| ILMN_2588671 | Add3      | 0.578863 | -0.29553 | 0.155144 | 0.450672 | 5.950775 | 6.275138 | 0.004382 | 0.032764 | 5.841156 | 6.420019 | 5.545628 |
| ILMN_2669782 | Phca      | -0.75657 | -0.33656 | -0.65468 | -0.31812 | 5.774545 | 6.27445  | 0.004384 | 0.032765 | 6.211495 | 5.454929 | 5.87494  |
| ILMN_2670022 | Plekhc1   | -0.68848 | -0.05532 | 0.335894 | 0.391216 | 8.445154 | 6.272708 | 0.004389 | 0.032775 | 8.547131 | 7.85865  | 8.49181  |
| ILMN_1219471 | Mylk      | 0.35345  | 0.701404 | 1.13155  | 0.430147 | 11.5199  | 6.272334 | 0.00439  | 0.032775 | 10.9733  | 11.32675 | 11.6747  |
| ILMN_2825109 | Zfp330    | -0.29322 | -0.48849 | -0.35145 | 0.13704  | 9.34593  | 6.272185 | 0.004391 | 0.032775 | 9.629219 | 9.335997 | 9.140731 |
| ILMN_1222503 | Alg5      | -0.42706 | -0.28676 | -0.46862 | -0.18186 | 11.35187 | 6.270418 | 0.004396 | 0.032801 | 11.64748 | 11.22042 | 11.36072 |
| ILMN_1252745 | Gtf2h2    | -0.27576 | -0.44103 | -0.5028  | -0.06177 | 8.817723 | 6.265513 | 0.004411 | 0.032885 | 9.122621 | 8.846861 | 8.68159  |
| ILMN_1222733 | Ptpn21    | 0.391836 | 0.543662 | 0.657741 | 0.114078 | 7.633501 | 6.265458 | 0.004411 | 0.032885 | 7.235192 | 7.627028 | 7.778854 |
| ILMN_2610899 | AA792894  | -0.41855 | -0.46279 | -0.69629 | -0.2335  | 7.87874  | 6.263756 | 0.004416 | 0.03291  | 8.273147 | 7.854602 | 7.810358 |
| ILMN_1224254 | 9530027K2 | 0.5124   | 0.113813 | 0.095552 | -0.01826 | 6.189684 | 6.262133 | 0.004421 | 0.032933 | 6.009243 | 6.521642 | 6.123056 |
| ILMN_2911307 | Gm347     | 0.586884 | 0.185742 | 0.472459 | 0.286717 | 5.21696  | 6.26004  | 0.004428 | 0.032966 | 4.905689 | 5.492573 | 5.091431 |
| ILMN_1221611 | Pitpn     | 0.616269 | 0.32868  | 0.476944 | 0.148263 | 9.887576 | 6.259131 | 0.00443  | 0.032973 | 9.532103 | 10.14837 | 9.860783 |
| ILMN_1244908 | Apip      | -0.31774 | -0.1573  | -0.78914 | -0.63184 | 6.507881 | 6.257617 | 0.004435 | 0.032994 | 6.823925 | 6.506183 | 6.666629 |
| ILMN_2736848 | Snx16     | -0.63927 | -0.59501 | -0.83896 | -0.24395 | 6.972606 | 6.254546 | 0.004444 | 0.033046 | 7.490916 | 6.851649 | 6.895903 |
| ILMN_2761273 | 2610528M  | -0.50241 | -0.57173 | -0.73445 | -0.16271 | 5.095256 | 6.254044 | 0.004446 | 0.033046 | 5.547403 | 5.044994 | 4.975669 |
| ILMN_2589915 | Hapln4    | 0.67366  | 0.249275 | 0.452216 | 0.202941 | 4.989805 | 6.252852 | 0.00445  | 0.033046 | 4.646017 | 5.319677 | 4.895292 |
| ILMN_2901903 | Pigf      | -0.43972 | -0.36904 | -0.61435 | -0.24531 | 10.17619 | 6.25285  | 0.00445  | 0.033046 | 10.53197 | 10.09225 | 10.16292 |

|              |           |          |          |          |          |          |          |          |          |          |          |          |
|--------------|-----------|----------|----------|----------|----------|----------|----------|----------|----------|----------|----------|----------|
| ILMN_1245139 | Scamp3    | 0.659213 | 0.281826 | 0.290892 | 0.009066 | 7.532564 | 6.251365 | 0.004454 | 0.033055 | 7.224581 | 7.883794 | 7.506407 |
| ILMN_2605453 | Ranbp10   | 0.496864 | 0.451425 | 0.582133 | 0.130708 | 7.851518 | 6.251133 | 0.004455 | 0.033055 | 7.468912 | 7.965777 | 7.920337 |
| ILMN_2590349 | 2510010F1 | -0.32839 | -0.21611 | -0.59496 | -0.37885 | 8.256575 | 6.250231 | 0.004458 | 0.033055 | 8.541438 | 8.21305  | 8.325329 |
| ILMN_1226138 | Jtb       | -0.48326 | -0.42321 | -0.52579 | -0.10258 | 11.46935 | 6.249984 | 0.004459 | 0.033055 | 11.82741 | 11.34415 | 11.4042  |
| ILMN_2757445 | 4921537DC | -0.33922 | -0.5014  | -0.50706 | -0.00565 | 7.457538 | 6.248886 | 0.004462 | 0.033067 | 7.794457 | 7.455235 | 7.293056 |
| ILMN_1226069 | Cklfsf6   | 0.546349 | 0.511058 | 0.404747 | -0.10631 | 9.670607 | 6.24639  | 0.00447  | 0.033107 | 9.305068 | 9.851417 | 9.816127 |
| ILMN_1247775 | Casq2     | -0.12656 | 0.412186 | 0.353542 | -0.05864 | 4.816316 | 6.245753 | 0.004472 | 0.033107 | 4.656525 | 4.529962 | 5.06871  |
| ILMN_2539564 | LOC381801 | -0.11283 | -0.3746  | -0.73073 | -0.35613 | 5.831679 | 6.245276 | 0.004473 | 0.033107 | 6.136217 | 6.023387 | 5.761622 |
| ILMN_3154581 | Gngt2     | -0.72834 | -0.27496 | -0.59971 | -0.32476 | 5.435438 | 6.238474 | 0.004494 | 0.033234 | 5.83619  | 5.107849 | 5.561235 |
| ILMN_2746283 | Mrvi1     | 0.007754 | 0.718283 | 1.277291 | 0.559007 | 8.677545 | 6.238416 | 0.004494 | 0.033234 | 8.176713 | 8.184466 | 8.894996 |
| ILMN_1222152 | Yipf3     | 0.561947 | 0.540937 | 0.575062 | 0.034125 | 10.59877 | 6.23791  | 0.004496 | 0.033234 | 10.17929 | 10.74123 | 10.72022 |
| ILMN_1254644 | Grccl9    | -0.66437 | -0.05848 | -0.03899 | 0.019486 | 7.903707 | 6.236281 | 0.004501 | 0.033247 | 8.094167 | 7.429794 | 8.035691 |
| ILMN_1256328 | Tjp2      | 0.699078 | 0.655936 | 0.703517 | 0.04758  | 8.023013 | 6.236146 | 0.004502 | 0.033247 | 7.50838  | 8.207458 | 8.164316 |
| ILMN_3163063 | Bnip2     | -0.69225 | -0.17787 | -0.23166 | -0.05379 | 7.85537  | 6.228117 | 0.004527 | 0.033418 | 8.130817 | 7.438566 | 7.952945 |
| ILMN_2658130 | BC016235  | 0.554647 | 0.284794 | 0.56436  | 0.279566 | 10.69558 | 6.226624 | 0.004531 | 0.033439 | 10.34463 | 10.89928 | 10.62942 |
| ILMN_2692399 | Thsd6     | -0.80006 | -0.77262 | -0.69556 | 0.077062 | 8.154232 | 6.223565 | 0.004541 | 0.033496 | 8.721295 | 7.92123  | 7.94867  |
| ILMN_2633275 | 2310061A2 | -0.54705 | -0.51293 | -0.46657 | 0.046359 | 5.256484 | 6.222325 | 0.004545 | 0.03351  | 5.63812  | 5.091073 | 5.125192 |
| ILMN_2807335 | 3110001A1 | 0.547682 | -0.15099 | -0.05071 | 0.100284 | 7.413512 | 6.221167 | 0.004549 | 0.03351  | 7.327017 | 7.874699 | 7.176023 |
| ILMN_1236845 | 5730466C2 | -0.6647  | -0.51681 | -0.39138 | 0.125429 | 7.144474 | 6.221117 | 0.004549 | 0.03351  | 7.537695 | 6.872996 | 7.020888 |
| ILMN_2479290 | Fas       | -0.5835  | -0.64021 | -0.94104 | -0.30082 | 7.613438 | 6.216671 | 0.004563 | 0.033592 | 8.154627 | 7.571124 | 7.514413 |
| ILMN_2913078 | Cps1      | 0.704701 | 0.258783 | -0.05678 | -0.31557 | 10.38379 | 6.216376 | 0.004564 | 0.033592 | 10.15711 | 10.86181 | 10.41589 |
| ILMN_1228132 | Lypla2    | 0.483966 | 0.367426 | 0.586325 | 0.218899 | 12.10986 | 6.214222 | 0.004571 | 0.033617 | 11.75043 | 12.2344  | 12.11786 |
| ILMN_2689025 | Pi4k2a    | 0.275679 | 0.488835 | 0.531172 | 0.042337 | 8.907141 | 6.214081 | 0.004571 | 0.033617 | 8.583219 | 8.858898 | 9.072054 |
| ILMN_1213144 | Wbp11     | 0.616981 | 0.211432 | 0.403141 | 0.191709 | 8.997965 | 6.212115 | 0.004577 | 0.033636 | 8.690076 | 9.307057 | 8.901508 |
| ILMN_2960407 | Mthfd1    | -0.13119 | -0.63083 | -0.56599 | 0.064837 | 8.516276 | 6.212081 | 0.004577 | 0.033636 | 8.848281 | 8.717086 | 8.217449 |
| ILMN_2600315 | Ckn1      | -0.31225 | -0.41024 | -0.6102  | -0.19996 | 5.88196  | 6.209262 | 0.004586 | 0.033687 | 6.215135 | 5.902882 | 5.804891 |
| ILMN_2740348 | Rhot2     | 0.501558 | 0.416843 | 0.474003 | 0.057161 | 9.865216 | 6.2085   | 0.004589 | 0.033691 | 9.517115 | 10.01867 | 9.933958 |
| ILMN_2925895 | BC006662  | -0.44879 | -0.2813  | -0.49614 | -0.21484 | 9.836693 | 6.202601 | 0.004608 | 0.033809 | 10.14325 | 9.694459 | 9.861949 |
| ILMN_2710544 | Stx8      | -0.41348 | -0.54803 | -0.5427  | 0.005321 | 9.177577 | 6.202241 | 0.004609 | 0.033809 | 9.55363  | 9.140146 | 9.005604 |
| ILMN_2751102 | Hist1h2ae | -0.67494 | -0.48035 | -0.25071 | 0.229639 | 5.558056 | 6.19717  | 0.004625 | 0.033912 | 5.909559 | 5.234615 | 5.429206 |
| ILMN_2618176 | Socs3     | -0.74711 | -0.4478  | -0.22655 | 0.221249 | 7.207017 | 6.196672 | 0.004627 | 0.033912 | 7.56238  | 6.815273 | 7.114583 |
| ILMN_2984969 | Phf23     | -0.56456 | -0.59967 | -0.52662 | 0.073045 | 5.289222 | 6.195875 | 0.004629 | 0.033915 | 5.711934 | 5.147373 | 5.112268 |
| ILMN_1223406 | Eps8l2    | 0.958537 | 0.801429 | 0.852012 | 0.050583 | 7.039802 | 6.195335 | 0.004631 | 0.033915 | 6.386807 | 7.345344 | 7.188237 |
| ILMN_2874836 | C730027E1 | 0.252334 | 0.65892  | -0.18209 | -0.84101 | 7.29216  | 6.193021 | 0.004638 | 0.03394  | 7.109868 | 7.362202 | 7.768788 |
| ILMN_2603953 | Stip1     | 0.14861  | -0.46715 | -0.33529 | 0.131863 | 9.749103 | 6.192935 | 0.004639 | 0.03394  | 9.912559 | 10.06117 | 9.44541  |

|              |           |          |          |          |          |          |          |          |          |          |          |          |
|--------------|-----------|----------|----------|----------|----------|----------|----------|----------|----------|----------|----------|----------|
| ILMN_2952841 | Usp47     | 0.521467 | 0.392518 | 0.477883 | 0.085366 | 9.207128 | 6.192447 | 0.00464  | 0.03394  | 8.859161 | 9.380628 | 9.251679 |
| ILMN_2940541 | Git1      | 0.670654 | 0.612766 | 0.568582 | -0.04418 | 5.96358  | 6.187213 | 0.004657 | 0.034029 | 5.50058  | 6.171233 | 6.113346 |
| ILMN_1254257 | Asl       | 0.519258 | -0.06631 | -0.18708 | -0.12077 | 6.180651 | 6.186932 | 0.004658 | 0.034029 | 6.114182 | 6.63344  | 6.047876 |
| ILMN_1257070 | Tcfcp2l3  | -0.88385 | -0.54848 | -0.46613 | 0.082355 | 5.983638 | 6.186382 | 0.00466  | 0.034029 | 6.458254 | 5.574404 | 5.90977  |
| ILMN_3154820 | St5       | 0.592526 | 0.567953 | 0.946646 | 0.378694 | 10.26147 | 6.186284 | 0.00466  | 0.034029 | 9.734692 | 10.32722 | 10.30264 |
| ILMN_1214488 | Pbp       | -0.3163  | -0.44911 | -0.76071 | -0.3116  | 7.623665 | 6.179504 | 0.004682 | 0.034176 | 8.005195 | 7.688892 | 7.556085 |
| ILMN_3043469 | Ret       | 0.723875 | 0.578925 | 0.561812 | -0.01711 | 5.622726 | 6.178144 | 0.004687 | 0.034185 | 5.156573 | 5.880448 | 5.735499 |
| ILMN_2595967 | Rpl35a    | -0.68729 | -0.38111 | -0.37133 | 0.009776 | 11.85354 | 6.177927 | 0.004687 | 0.034185 | 12.21347 | 11.52618 | 11.83236 |
| ILMN_2613851 | 1600021C1 | -0.6697  | -0.77215 | -0.74502 | 0.027133 | 5.187005 | 6.174726 | 0.004698 | 0.034247 | 5.733723 | 5.064023 | 4.961571 |
| ILMN_2590015 | 2700038CC | -0.27493 | -0.10787 | -0.52497 | -0.4171  | 8.869828 | 6.170923 | 0.00471  | 0.034309 | 9.096772 | 8.821841 | 8.988898 |
| ILMN_2622983 | Dusp1     | -0.87935 | -0.70907 | -0.34265 | 0.366428 | 8.639683 | 6.170668 | 0.004711 | 0.034309 | 9.122451 | 8.243098 | 8.413378 |
| ILMN_1235006 | Slc14a1   | 0.792268 | 0.474749 | 0.301296 | -0.17345 | 5.079331 | 6.170306 | 0.004712 | 0.034309 | 4.687253 | 5.479522 | 5.162002 |
| ILMN_3154007 | Copg      | 0.906452 | 0.146914 | 0.067999 | -0.07891 | 7.564741 | 6.16955  | 0.004715 | 0.034313 | 7.284399 | 8.190852 | 7.431313 |
| ILMN_2691613 | Ppp1ca    | -0.51925 | -0.39347 | -0.44575 | -0.05228 | 11.47834 | 6.167261 | 0.004722 | 0.034353 | 11.81795 | 11.29871 | 11.42449 |
| ILMN_1214952 | Cln3      | 0.523389 | 0.43989  | 0.458827 | 0.018937 | 8.274112 | 6.166433 | 0.004725 | 0.034359 | 7.918585 | 8.441974 | 8.358476 |
| ILMN_2833985 | BC003324  | -0.69581 | -0.45299 | -0.51348 | -0.06049 | 8.67601  | 6.159757 | 0.004747 | 0.034495 | 9.09158  | 8.395775 | 8.638589 |
| ILMN_3011353 | Mbp       | 0.728656 | 0.569356 | 0.781843 | 0.212487 | 8.064376 | 6.15959  | 0.004748 | 0.034495 | 7.544412 | 8.273068 | 8.113768 |
| ILMN_3131197 | Repin1    | 0.380651 | 0.566322 | 0.714635 | 0.148313 | 6.544746 | 6.156382 | 0.004758 | 0.034557 | 6.129344 | 6.509994 | 6.695666 |
| ILMN_1214811 | Psen1     | 0.599275 | 0.573516 | 0.554423 | -0.01909 | 9.190802 | 6.154477 | 0.004765 | 0.034589 | 8.758999 | 9.358274 | 9.332515 |
| ILMN_2824167 | Ecsit     | 0.273488 | -0.16196 | -0.16379 | -0.00183 | 8.529959 | 6.145794 | 0.004794 | 0.03478  | 8.543025 | 8.816513 | 8.381062 |
| ILMN_2813186 | Avpi1     | -0.7887  | -0.62746 | -0.81955 | -0.1921  | 5.810037 | 6.145377 | 0.004795 | 0.03478  | 6.368966 | 5.580264 | 5.741508 |
| ILMN_2817996 | Ppa2      | -0.60903 | -0.80421 | -0.78542 | 0.018792 | 8.595884 | 6.143951 | 0.0048   | 0.034801 | 9.145549 | 8.536518 | 8.341338 |
| ILMN_2736539 | Cyp2c55   | -2.27747 | -1.70815 | -1.41172 | 0.296429 | 7.986721 | 6.141774 | 0.004807 | 0.034839 | 9.336055 | 7.058586 | 7.627908 |
| ILMN_2834677 | Wipi1     | 0.458613 | 0.60181  | 0.76025  | 0.15844  | 6.630159 | 6.136794 | 0.004824 | 0.034943 | 6.174991 | 6.633604 | 6.776801 |
| ILMN_2753096 | Tex27     | 0.407349 | 0.411707 | 0.560947 | 0.14924  | 9.911019 | 6.136335 | 0.004825 | 0.034943 | 9.566018 | 9.973367 | 9.977725 |
| ILMN_1249426 | Socs4     | -0.59083 | -0.49452 | -0.66496 | -0.17044 | 7.725234 | 6.135125 | 0.00483  | 0.034945 | 8.162812 | 7.57198  | 7.668295 |
| ILMN_2808946 | Rps5      | -0.72629 | -0.4617  | -0.56261 | -0.10091 | 10.94311 | 6.135064 | 0.00483  | 0.034945 | 11.38076 | 10.65447 | 10.91906 |
| ILMN_2419247 | Trp53bp2  | 0.208382 | 0.474255 | 0.724968 | 0.250713 | 6.563352 | 6.134342 | 0.004832 | 0.034948 | 6.211451 | 6.419833 | 6.685706 |
| ILMN_2636435 | Ndufb2    | -0.88846 | -0.85075 | -0.77431 | 0.076438 | 6.224108 | 6.132534 | 0.004838 | 0.034977 | 6.852486 | 5.96403  | 6.001739 |
| ILMN_2464061 | Tubd1     | -0.43366 | -0.46822 | -0.72869 | -0.26048 | 6.26504  | 6.124854 | 0.004864 | 0.035145 | 6.672682 | 6.239026 | 6.204465 |
| ILMN_1255898 | 1110014D1 | -0.21906 | -0.29581 | -0.6523  | -0.35648 | 7.565079 | 6.124527 | 0.004865 | 0.035145 | 7.85687  | 7.637812 | 7.561057 |
| ILMN_2634720 | Rpo1-3    | -0.52614 | -0.33803 | -0.41049 | -0.07246 | 11.44259 | 6.123042 | 0.004871 | 0.035167 | 11.76126 | 11.23512 | 11.42323 |
| ILMN_2637241 | Dhps      | -0.43205 | -0.42826 | -0.71009 | -0.28183 | 8.043504 | 6.121577 | 0.004876 | 0.035188 | 8.436103 | 8.004057 | 8.007844 |
| ILMN_2999797 | Rpl27     | -0.39711 | -0.33048 | -0.43915 | -0.10867 | 13.49366 | 6.111217 | 0.004911 | 0.035429 | 13.78535 | 13.38823 | 13.45486 |
| ILMN_2998135 | Atg5      | -0.54888 | -0.4838  | -0.4197  | 0.064102 | 10.20446 | 6.109078 | 0.004918 | 0.035468 | 10.56755 | 10.01867 | 10.08375 |

|              |           |          |          |          |          |          |          |          |          |          |          |          |
|--------------|-----------|----------|----------|----------|----------|----------|----------|----------|----------|----------|----------|----------|
| ILMN_1226476 | 231000412 | -0.68354 | -0.36018 | -0.60957 | -0.24939 | 8.994278 | 6.101169 | 0.004946 | 0.03565  | 9.407601 | 8.724063 | 9.047419 |
| ILMN_1251416 | Sh3gl2    | 0.551799 | 0.271226 | 0.440712 | 0.169487 | 9.601764 | 6.100464 | 0.004948 | 0.035653 | 9.285829 | 9.837628 | 9.557055 |
| ILMN_2778799 | 251004911 | -0.40939 | -0.55865 | -0.66929 | -0.11064 | 5.907923 | 6.098498 | 0.004955 | 0.035676 | 6.317256 | 5.907865 | 5.758605 |
| ILMN_1251109 | AW491445  | 0.536046 | 0.490922 | 0.512163 | 0.021242 | 12.24441 | 6.098356 | 0.004955 | 0.035676 | 11.85963 | 12.39567 | 12.35055 |
| ILMN_1237140 | Sf3b3     | 0.602601 | 0.224852 | 0.372173 | 0.147321 | 8.09948  | 6.091487 | 0.004979 | 0.035834 | 7.799573 | 8.402174 | 8.024425 |
| ILMN_2733380 | Snx17     | 0.649437 | 0.151055 | 0.053354 | -0.0977  | 8.215957 | 6.089825 | 0.004985 | 0.035861 | 8.002496 | 8.651933 | 8.15355  |
| ILMN_2607926 | Kdelr2    | 0.512492 | 0.221426 | -0.0175  | -0.23892 | 10.20164 | 6.087698 | 0.004993 | 0.035899 | 10.02254 | 10.53503 | 10.24396 |
| ILMN_2729363 | Ppp1r14a  | -0.93485 | -0.1538  | -0.15993 | -0.00613 | 6.498663 | 6.086539 | 0.004997 | 0.035914 | 6.810807 | 5.875959 | 6.657008 |
| ILMN_1230485 | Csf1r     | 0.862699 | 0.680287 | 0.871195 | 0.190908 | 5.329833 | 6.08332  | 0.005008 | 0.03598  | 4.726288 | 5.588987 | 5.406575 |
| ILMN_2832524 | Gpt1      | 0.718796 | 0.384408 | 0.223219 | -0.16119 | 11.97046 | 6.080165 | 0.005019 | 0.036033 | 11.63886 | 12.35765 | 12.02326 |
| ILMN_1239330 | ORF5      | -0.55102 | -0.52732 | -0.48008 | 0.047238 | 7.07746  | 6.080014 | 0.00502  | 0.036033 | 7.467064 | 6.916043 | 6.939747 |
| ILMN_1236758 | 1600023AC | -0.76857 | -0.75762 | -0.49715 | 0.260467 | 6.088437 | 6.079444 | 0.005022 | 0.036033 | 6.594271 | 5.825706 | 5.836651 |
| ILMN_2732998 | 2310058J0 | 0.369339 | 0.395399 | 0.791351 | 0.395952 | 5.008798 | 6.075036 | 0.005037 | 0.036123 | 4.619776 | 4.989115 | 5.015175 |
| ILMN_2997379 | Mterfd3   | -0.56817 | -0.48623 | -0.6841  | -0.19787 | 5.042482 | 6.074738 | 0.005038 | 0.036123 | 5.477108 | 4.908942 | 4.990875 |
| ILMN_1245471 | BC002199  | 0.555772 | 0.337705 | 0.485266 | 0.147562 | 11.33982 | 6.071282 | 0.005051 | 0.036185 | 10.99514 | 11.55091 | 11.33284 |
| ILMN_2620326 | Cyp27a1   | 0.47872  | 0.683494 | 0.940397 | 0.256902 | 10.04195 | 6.070924 | 0.005052 | 0.036185 | 9.516296 | 9.995015 | 10.19979 |
| ILMN_2755492 | D6Wsu176  | 0.501813 | 0.510796 | 0.52651  | 0.015715 | 10.47007 | 6.070526 | 0.005053 | 0.036185 | 10.08529 | 10.5871  | 10.59609 |
| ILMN_1218263 | Pemt      | -0.30344 | -0.3463  | -0.64882 | -0.30252 | 5.484119 | 6.068962 | 0.005059 | 0.03621  | 5.808759 | 5.505323 | 5.462458 |
| ILMN_2678828 | Eif5a     | 0.000288 | -0.19595 | -0.4672  | -0.27125 | 11.14716 | 6.067882 | 0.005063 | 0.036223 | 11.31288 | 11.31317 | 11.11693 |
| ILMN_2640348 | 2310014H1 | -0.27694 | 0.179442 | 0.532643 | 0.353201 | 7.008227 | 6.066409 | 0.005068 | 0.036245 | 6.899442 | 6.622499 | 7.078884 |
| ILMN_1220261 | Tm4sf3    | -1.21233 | -1.04819 | -0.55937 | 0.488824 | 10.98549 | 6.062167 | 0.005083 | 0.036339 | 11.69046 | 10.47813 | 10.64227 |
| ILMN_2599667 | Ap4m1     | -0.53343 | -0.40657 | -0.32254 | 0.084034 | 6.40763  | 6.060051 | 0.005091 | 0.036365 | 6.723267 | 6.189834 | 6.316693 |
| ILMN_1231439 | Aatk      | -0.00347 | 0.357171 | 0.872133 | 0.514962 | 6.495823 | 6.05997  | 0.005091 | 0.036365 | 6.189364 | 6.185894 | 6.546535 |
| ILMN_2718266 | Fkbp5     | 1.261685 | 0.831375 | 0.747772 | -0.0836  | 7.316203 | 6.058904 | 0.005095 | 0.036377 | 6.605995 | 7.867679 | 7.43737  |
| ILMN_3145881 | Cnot2     | 0.857557 | 0.318762 | 0.166955 | -0.15181 | 5.012715 | 6.057068 | 0.005101 | 0.036409 | 4.676897 | 5.534454 | 4.995659 |
| ILMN_2748336 | Elf2      | 0.667546 | 0.005459 | 0.394872 | 0.389412 | 4.970438 | 6.055203 | 0.005108 | 0.036442 | 4.703469 | 5.371015 | 4.708928 |
| ILMN_2683586 | Capn2     | 0.160991 | 0.37498  | 0.798476 | 0.423495 | 5.625873 | 6.054348 | 0.005111 | 0.036449 | 5.292262 | 5.453252 | 5.667242 |
| ILMN_2850077 | Adh1      | 1.426748 | 1.154102 | 0.749537 | -0.40457 | 13.44255 | 6.051026 | 0.005123 | 0.036519 | 12.60995 | 14.0367  | 13.76406 |
| ILMN_3163134 | Arl6      | -0.71276 | -0.17334 | -0.07663 | 0.096717 | 5.954074 | 6.049933 | 0.005127 | 0.03653  | 6.194757 | 5.481993 | 6.021415 |
| ILMN_2676512 | Riok1     | -0.02033 | -0.16392 | 0.308096 | 0.472017 | 6.783712 | 6.049468 | 0.005129 | 0.03653  | 6.752751 | 6.732419 | 6.58883  |
| ILMN_2620729 | CommD9    | -0.31573 | -0.00823 | -0.36913 | -0.36091 | 7.408454 | 6.043686 | 0.005149 | 0.036663 | 7.581727 | 7.265997 | 7.5735   |
| ILMN_2767674 | AU022870  | -0.46903 | -0.39354 | -0.31318 | 0.080358 | 10.04089 | 6.043011 | 0.005152 | 0.036666 | 10.33483 | 9.865798 | 9.941292 |
| ILMN_2660864 | Klhl7     | -0.74363 | -0.34786 | -0.34978 | -0.00192 | 6.440978 | 6.041697 | 0.005157 | 0.036685 | 6.801297 | 6.057665 | 6.453437 |
| ILMN_1234388 | Ptk9l     | -0.50717 | -0.25495 | -0.38018 | -0.12522 | 7.557424 | 6.038385 | 0.005169 | 0.036751 | 7.842999 | 7.335826 | 7.588048 |
| ILMN_2810963 | Camk2n1   | 0.044855 | 0.320043 | 0.595884 | 0.275841 | 10.12935 | 6.037616 | 0.005172 | 0.036751 | 9.889155 | 9.93401  | 10.2092  |

|              |           |          |          |          |          |          |          |          |          |          |          |          |
|--------------|-----------|----------|----------|----------|----------|----------|----------|----------|----------|----------|----------|----------|
| ILMN_3003290 | Hdgf      | 0.734606 | 0.322839 | 0.645371 | 0.322533 | 11.54283 | 6.037043 | 0.005174 | 0.036751 | 11.11712 | 11.85173 | 11.43996 |
| ILMN_2619848 | Tfrc      | -0.79917 | -0.6327  | -0.55114 | 0.081556 | 10.82368 | 6.036813 | 0.005174 | 0.036751 | 11.31943 | 10.52026 | 10.68673 |
| ILMN_3024068 | Hnrpa1    | 0.193987 | 0.373868 | 0.438716 | 0.064848 | 4.807948 | 6.035908 | 0.005178 | 0.03676  | 4.556305 | 4.750291 | 4.930173 |
| ILMN_2986605 | Pdss1     | -0.35727 | -0.5115  | -0.67163 | -0.16013 | 8.797993 | 6.034585 | 0.005183 | 0.036779 | 9.183095 | 8.825822 | 8.67159  |
| ILMN_1245609 | Sgpl1     | 0.574656 | 0.882426 | 0.910115 | 0.027689 | 10.24092 | 6.03273  | 0.005189 | 0.036812 | 9.649124 | 10.22378 | 10.53155 |
| ILMN_2611931 | Surf2     | 0.048659 | -0.28431 | -0.50793 | -0.22362 | 6.944385 | 6.031683 | 0.005193 | 0.036812 | 7.13028  | 7.17894  | 6.845972 |
| ILMN_2757368 | Creld2    | 0.034628 | -0.50839 | -0.55766 | -0.04926 | 9.055984 | 6.031562 | 0.005194 | 0.036812 | 9.313839 | 9.348467 | 8.805448 |
| ILMN_1219231 | Akap1     | 0.516748 | 0.276057 | 0.270496 | -0.00556 | 7.490479 | 6.029879 | 0.0052   | 0.036836 | 7.224653 | 7.741402 | 7.50071  |
| ILMN_2751865 | Stk19     | -0.76221 | -0.33342 | -0.54924 | -0.21582 | 7.257817 | 6.029001 | 0.005203 | 0.036836 | 7.669034 | 6.906826 | 7.335613 |
| ILMN_2816660 | Chic1     | -0.60206 | -0.57019 | -0.37697 | 0.19322  | 4.884264 | 6.028451 | 0.005205 | 0.036836 | 5.271572 | 4.669509 | 4.701377 |
| ILMN_2765080 | 6330412F1 | 0.421138 | 0.458528 | 0.455844 | -0.00268 | 8.49233  | 6.028336 | 0.005205 | 0.036836 | 8.158453 | 8.579591 | 8.616981 |
| ILMN_1218266 | Meis1     | -0.42623 | 0.176665 | 0.710858 | 0.534193 | 7.197203 | 6.025016 | 0.005218 | 0.036907 | 7.081879 | 6.655653 | 7.258543 |
| ILMN_2595346 | Mab2112   | 0.083456 | 0.574514 | 0.655393 | 0.080879 | 5.718868 | 6.02122  | 0.005232 | 0.036979 | 5.390527 | 5.473983 | 5.965041 |
| ILMN_2598478 | Sncg      | -0.64268 | 0.508445 | -0.26718 | -0.77563 | 7.303184 | 6.020927 | 0.005233 | 0.036979 | 7.403539 | 6.760857 | 7.911983 |
| ILMN_2706061 | Sfpq      | 0.697096 | 0.041099 | 0.377766 | 0.336667 | 8.599698 | 6.020545 | 0.005234 | 0.036979 | 8.320708 | 9.017804 | 8.361807 |
| ILMN_2742861 | BC049975  | 0.858497 | 0.947267 | 0.498849 | -0.44842 | 5.632458 | 6.019098 | 0.005239 | 0.03698  | 5.056305 | 5.914802 | 6.003571 |
| ILMN_2611648 | Mrpl16    | -0.22536 | -0.58583 | -0.67033 | -0.0845  | 8.238298 | 6.018479 | 0.005242 | 0.03698  | 8.60868  | 8.383318 | 8.022847 |
| ILMN_2643264 | Mrpl3     | -0.31583 | -0.39829 | -0.6322  | -0.23391 | 9.775409 | 6.018219 | 0.005243 | 0.03698  | 10.11199 | 9.796158 | 9.7137   |
| ILMN_2718791 | Sphk2     | 0.615179 | 0.400673 | 0.646954 | 0.246281 | 9.780836 | 6.018185 | 0.005243 | 0.03698  | 9.365135 | 9.980314 | 9.765807 |
| ILMN_2709997 | ORF9      | -1.09919 | -0.87339 | -0.88623 | -0.01284 | 9.220168 | 6.015009 | 0.005255 | 0.037048 | 9.93487  | 8.835684 | 9.061477 |
| ILMN_2543108 | Wdt3-penc | -0.49549 | -0.48329 | -0.56352 | -0.08023 | 6.895955 | 6.013803 | 0.005259 | 0.037054 | 7.28153  | 6.786038 | 6.798243 |
| ILMN_2737479 | Slc12a9   | 0.553828 | 0.456574 | 0.631955 | 0.175381 | 5.622198 | 6.013638 | 0.00526  | 0.037054 | 5.211608 | 5.765436 | 5.668182 |
| ILMN_2648455 | Nfatc1    | 0.509145 | 0.572126 | 0.591458 | 0.019331 | 6.408613 | 6.009228 | 0.005276 | 0.037137 | 5.990431 | 6.499575 | 6.562557 |
| ILMN_2643455 | Trabd     | -0.2967  | -0.52275 | -0.65211 | -0.12936 | 7.409539 | 6.008772 | 0.005278 | 0.037137 | 7.777426 | 7.480727 | 7.254681 |
| ILMN_2457585 | Trp53inp2 | 0.203252 | 0.590257 | 0.896459 | 0.306203 | 8.306433 | 6.008742 | 0.005278 | 0.037137 | 7.883941 | 8.087193 | 8.474197 |
| ILMN_2718854 | Mettl2    | -0.42272 | -0.43274 | -0.58398 | -0.15124 | 6.99498  | 6.006388 | 0.005287 | 0.037178 | 7.354841 | 6.932117 | 6.922102 |
| ILMN_2493231 | Zswim5    | 0.719561 | 0.400502 | 0.614586 | 0.214083 | 6.584582 | 6.00593  | 0.005288 | 0.037178 | 6.15092  | 6.87048  | 6.551422 |
| ILMN_2732961 | 5230400G2 | -0.25291 | -0.34795 | -0.57588 | -0.22793 | 7.366917 | 6.005204 | 0.005291 | 0.037178 | 7.661104 | 7.408192 | 7.313151 |
| ILMN_3107114 | Stx3      | 0.343531 | 0.82752  | 0.394152 | -0.43337 | 8.163671 | 6.004638 | 0.005293 | 0.037178 | 7.77237  | 8.115901 | 8.59989  |
| ILMN_2742636 | Lipe      | 0.697075 | 0.71052  | 0.647912 | -0.06261 | 6.012118 | 6.004339 | 0.005294 | 0.037178 | 5.498242 | 6.195317 | 6.208761 |
| ILMN_2677332 | Hic2      | 0.210192 | 0.256306 | 0.65189  | 0.395584 | 4.99784  | 6.001254 | 0.005306 | 0.037236 | 4.718243 | 4.928435 | 4.974549 |
| ILMN_1215537 | BC048937  | 0.282146 | 0.35744  | 0.638377 | 0.280937 | 7.425518 | 6.000312 | 0.005309 | 0.037236 | 7.106027 | 7.388174 | 7.463467 |
| ILMN_2767057 | 311008211 | -0.58087 | -0.44531 | -0.62206 | -0.17675 | 6.42825  | 6.000016 | 0.005311 | 0.037236 | 6.84031  | 6.259439 | 6.395001 |
| ILMN_1257666 | D14Ert221 | 0.484394 | 0.572731 | 0.51148  | -0.06125 | 8.363395 | 5.999839 | 0.005311 | 0.037236 | 7.971244 | 8.455638 | 8.543974 |
| ILMN_1216623 | 0610007P2 | -0.35286 | -0.35628 | -0.54995 | -0.19367 | 7.678334 | 5.997225 | 0.005321 | 0.037277 | 7.993108 | 7.640244 | 7.636828 |

|              |           |          |          |          |          |          |          |          |          |          |          |          |
|--------------|-----------|----------|----------|----------|----------|----------|----------|----------|----------|----------|----------|----------|
| ILMN_3092653 | Palld     | 0.225522 | 0.624656 | 1.045104 | 0.420447 | 6.903391 | 5.997141 | 0.005321 | 0.037277 | 6.42957  | 6.655092 | 7.054226 |
| ILMN_2635024 | Nupl1     | -0.43484 | -0.69537 | -0.92745 | -0.23208 | 6.016605 | 5.994493 | 0.005331 | 0.037332 | 6.531022 | 6.096182 | 5.835649 |
| ILMN_1220132 | A130042E2 | 0.168605 | -0.44023 | -0.07373 | 0.366499 | 5.252656 | 5.990405 | 0.005347 | 0.037407 | 5.338997 | 5.507602 | 4.898764 |
| ILMN_2892222 | Acsf5     | 0.362861 | 0.457378 | 0.294931 | -0.16245 | 14.15034 | 5.990057 | 0.005348 | 0.037407 | 13.87155 | 14.23441 | 14.32893 |
| ILMN_2679619 | Rb1       | 0.608149 | 0.36536  | 0.418288 | 0.052928 | 8.705262 | 5.98995  | 0.005348 | 0.037407 | 8.357313 | 8.965461 | 8.722673 |
| ILMN_3141195 | Zfp692    | -0.32475 | -0.26752 | 0.346028 | 0.613548 | 5.06246  | 5.98905  | 0.005352 | 0.037415 | 5.12402  | 4.799269 | 4.856501 |
| ILMN_2714936 | Mki67ip   | 0.024676 | -0.31355 | -0.46572 | -0.15217 | 8.294506 | 5.98608  | 0.005363 | 0.037479 | 8.483156 | 8.507831 | 8.169604 |
| ILMN_1225033 | Myg1      | -0.30142 | -0.49548 | -0.48472 | 0.010766 | 8.056098 | 5.982607 | 0.005376 | 0.037545 | 8.376503 | 8.07508  | 7.881021 |
| ILMN_2919263 | Slc25a1   | 0.571639 | 0.561553 | 0.174812 | -0.38674 | 10.2078  | 5.982197 | 0.005378 | 0.037545 | 9.880803 | 10.45244 | 10.44236 |
| ILMN_2803399 | Mcm6      | 0.258922 | -0.53796 | -0.27831 | 0.259656 | 8.22373  | 5.981898 | 0.005379 | 0.037545 | 8.363066 | 8.621988 | 7.825105 |
| ILMN_2419185 | Tuft1     | -0.49137 | -0.01442 | 0.283167 | 0.297591 | 10.7852  | 5.974269 | 0.005408 | 0.037733 | 10.84086 | 10.34949 | 10.82643 |
| ILMN_1227159 | Dutp      | -0.1142  | -0.57662 | -0.55648 | 0.020147 | 5.830971 | 5.972616 | 0.005414 | 0.037762 | 6.142796 | 6.028595 | 5.566174 |
| ILMN_2729607 | Scnn1a    | 0.644175 | 0.780633 | 0.443452 | -0.33718 | 6.569838 | 5.967814 | 0.005433 | 0.037864 | 6.102773 | 6.746948 | 6.883406 |
| ILMN_1226819 | Tapbp     | 0.828207 | 0.678852 | 0.532452 | -0.1464  | 8.221068 | 5.967684 | 0.005433 | 0.037864 | 7.71119  | 8.539397 | 8.390042 |
| ILMN_1237328 | Mboat5    | 0.890034 | 0.987503 | 0.799276 | -0.18823 | 7.966811 | 5.966857 | 0.005437 | 0.037871 | 7.297608 | 8.187642 | 8.285111 |
| ILMN_1228942 | Cd59a     | -1.13266 | -0.21689 | -0.01234 | 0.204547 | 10.39532 | 5.964668 | 0.005445 | 0.037914 | 10.73579 | 9.603136 | 10.5189  |
| ILMN_1216919 | Sec24c    | 0.603191 | 0.456225 | 0.514782 | 0.058557 | 9.673274 | 5.963024 | 0.005451 | 0.037943 | 9.279725 | 9.882916 | 9.73595  |
| ILMN_2724942 | Ptgis     | -1.00203 | -0.07695 | -0.04797 | 0.028977 | 7.161841 | 5.956205 | 0.005478 | 0.038112 | 7.443578 | 6.441548 | 7.36663  |
| ILMN_3004151 | 1600002KC | -0.72238 | -0.32358 | -0.47753 | -0.15395 | 9.133066 | 5.95222  | 0.005493 | 0.038204 | 9.513938 | 8.791559 | 9.19036  |
| ILMN_1256795 | Eif2s2    | -0.28764 | -0.45284 | -0.42031 | 0.03253  | 9.069123 | 5.946578 | 0.005515 | 0.038329 | 9.359322 | 9.071684 | 8.906478 |
| ILMN_2754015 | D030070LC | -0.48276 | -0.45998 | -0.87076 | -0.41078 | 7.394628 | 5.946514 | 0.005515 | 0.038329 | 7.848002 | 7.365242 | 7.388021 |
| ILMN_2620799 | A930010I2 | -0.05316 | 0.53113  | 0.179041 | -0.35209 | 4.889492 | 5.94443  | 0.005524 | 0.03837  | 4.72524  | 4.672078 | 5.256369 |
| ILMN_2892507 | Fut4      | 0.935182 | 0.523127 | 0.57988  | 0.056754 | 9.174122 | 5.939386 | 0.005543 | 0.038492 | 8.664574 | 9.599756 | 9.187701 |
| ILMN_3078306 | Cyb561d1  | 0.327738 | 0.3984   | 0.599609 | 0.20121  | 7.639859 | 5.937753 | 0.00555  | 0.038521 | 7.308423 | 7.636161 | 7.706822 |
| ILMN_2644827 | Pte2a     | 1.901263 | 1.74812  | 0.480966 | -1.26715 | 5.852125 | 5.93627  | 0.005556 | 0.038525 | 4.819537 | 6.7208   | 6.567657 |
| ILMN_1220244 | Pitx2     | -0.03663 | -0.55059 | -0.64685 | -0.09626 | 7.154801 | 5.936156 | 0.005556 | 0.038525 | 7.46332  | 7.426687 | 6.912731 |
| ILMN_2688236 | Atp2a3    | 0.277473 | 0.239489 | 0.789462 | 0.549973 | 11.10833 | 5.935951 | 0.005557 | 0.038525 | 10.78172 | 11.0592  | 11.02121 |
| ILMN_3118569 | Cdc2l5    | 0.45132  | 0.293869 | 0.414505 | 0.120636 | 7.605446 | 5.935318 | 0.005559 | 0.038525 | 7.315522 | 7.766843 | 7.609392 |
| ILMN_2699466 | Pla2g12b  | -0.59787 | -0.16728 | -0.34759 | -0.18031 | 11.47944 | 5.934807 | 0.005561 | 0.038525 | 11.75763 | 11.15976 | 11.59035 |
| ILMN_2835723 | Manba     | 0.51683  | 0.41365  | 0.394655 | -0.019   | 8.38814  | 5.933341 | 0.005567 | 0.03855  | 8.056856 | 8.573686 | 8.470506 |
| ILMN_2624209 | St14      | 0.458224 | 0.787439 | 0.665421 | -0.12202 | 9.611793 | 5.931686 | 0.005574 | 0.03858  | 9.134022 | 9.592245 | 9.921461 |
| ILMN_2944576 | Pex6      | 0.483124 | 0.37137  | 0.507413 | 0.136043 | 7.634967 | 5.929199 | 0.005584 | 0.038633 | 7.29449  | 7.777614 | 7.665861 |
| ILMN_2662602 | Mylk      | 0.418254 | 0.792415 | 1.18397  | 0.391556 | 11.33105 | 5.927296 | 0.005591 | 0.03867  | 10.73239 | 11.15065 | 11.52481 |
| ILMN_2512740 | Tm6sf2    | 0.401498 | 0.474441 | 0.342096 | -0.13234 | 11.6747  | 5.923711 | 0.005605 | 0.038751 | 11.37019 | 11.77169 | 11.84463 |
| ILMN_2755660 | Ptma      | -0.53403 | -1.0376  | -0.43983 | 0.597772 | 7.425521 | 5.923222 | 0.005607 | 0.038751 | 7.928386 | 7.394355 | 6.890785 |



|              |           |          |          |          |          |          |          |          |          |          |          |          |
|--------------|-----------|----------|----------|----------|----------|----------|----------|----------|----------|----------|----------|----------|
| ILMN_2987107 | 2310056PC | -0.8862  | -0.71244 | -0.95164 | -0.23921 | 10.06738 | 5.922228 | 0.005611 | 0.038763 | 10.70495 | 9.81875  | 9.992515 |
| ILMN_1224112 | Vti1b     | -0.85796 | -0.84736 | -0.4946  | 0.352763 | 8.667179 | 5.919387 | 0.005623 | 0.038826 | 9.217159 | 8.359202 | 8.369797 |
| ILMN_2896229 | Zfp219    | 0.36391  | 0.352957 | 0.61522  | 0.262263 | 7.152887 | 5.918278 | 0.005627 | 0.038841 | 6.819865 | 7.183776 | 7.172822 |
| ILMN_2709525 | Cdc16     | -0.36496 | -0.58977 | -0.42851 | 0.161262 | 6.589499 | 5.917458 | 0.00563  | 0.038848 | 6.935309 | 6.570346 | 6.34554  |
| ILMN_1259356 | Snrk      | 0.787476 | 0.568622 | 0.682346 | 0.113724 | 6.441154 | 5.915792 | 0.005637 | 0.038879 | 5.931543 | 6.719019 | 6.500165 |
| ILMN_2633697 | Skp2      | 0.069815 | -0.31211 | -0.30653 | 0.005575 | 5.054474 | 5.914028 | 0.005644 | 0.038911 | 5.19168  | 5.261495 | 4.879574 |
| ILMN_1226133 | Dgcr8     | -1.06498 | -0.49575 | -0.51476 | -0.01901 | 7.059568 | 5.913533 | 0.005646 | 0.038911 | 7.578441 | 6.513463 | 7.082688 |
| ILMN_1253942 | Bop1      | -0.07481 | -0.47787 | -0.38936 | 0.088502 | 7.259846 | 5.912134 | 0.005652 | 0.038934 | 7.495356 | 7.420546 | 7.01749  |
| ILMN_2754435 | Ldb2      | -0.0703  | 0.16917  | 0.757383 | 0.588213 | 5.552468 | 5.908694 | 0.005666 | 0.039004 | 5.338404 | 5.268105 | 5.507575 |
| ILMN_3161790 | AI451557  | 0.328432 | 0.7958   | 0.385625 | -0.41017 | 5.052182 | 5.908086 | 0.005668 | 0.039004 | 4.674718 | 5.00315  | 5.470518 |
| ILMN_2844153 | BC024868  | 0.49703  | 0.556231 | 0.4165   | -0.13973 | 6.394855 | 5.907391 | 0.005671 | 0.039004 | 6.027415 | 6.524444 | 6.583646 |
| ILMN_1221936 | 2810437L1 | -0.49435 | -0.40977 | -0.47916 | -0.06939 | 10.74187 | 5.907002 | 0.005672 | 0.039004 | 11.08769 | 10.59334 | 10.67792 |
| ILMN_2680054 | DOH4S114  | -0.46662 | 0.13412  | 0.443996 | 0.309877 | 8.300224 | 5.906839 | 0.005673 | 0.039004 | 8.272352 | 7.805727 | 8.406471 |
| ILMN_1252195 | Arf3      | 0.682798 | 0.421804 | 0.557222 | 0.135418 | 7.658432 | 5.901144 | 0.005696 | 0.039147 | 7.242976 | 7.925774 | 7.66478  |
| ILMN_2709690 | Rhbdd2    | 0.724711 | 0.775251 | 0.342988 | -0.43226 | 6.043438 | 5.899656 | 0.005702 | 0.039173 | 5.5827   | 6.307411 | 6.357952 |
| ILMN_1237767 | Hnf4a     | 0.499898 | 0.351989 | 0.732895 | 0.380906 | 10.67233 | 5.896197 | 0.005716 | 0.039254 | 10.27613 | 10.77603 | 10.62812 |
| ILMN_1251426 | Klf7      | 0.568586 | 0.414884 | 0.970355 | 0.555472 | 6.936042 | 5.891599 | 0.005735 | 0.039367 | 6.447586 | 7.016172 | 6.862469 |
| ILMN_2856697 | Calm2     | -0.42223 | -0.69043 | -0.48513 | 0.205295 | 10.50044 | 5.890456 | 0.00574  | 0.039383 | 10.89989 | 10.47765 | 10.20946 |
| ILMN_2666483 | Ruvbl1    | -0.20869 | -0.31114 | -0.61445 | -0.30331 | 8.151337 | 5.889584 | 0.005743 | 0.039388 | 8.434906 | 8.226221 | 8.123764 |
| ILMN_2687661 | Mfng      | -0.55783 | -0.51548 | -0.52324 | -0.00776 | 4.934593 | 5.889185 | 0.005745 | 0.039388 | 5.33373  | 4.775903 | 4.818248 |
| ILMN_1253473 | Ppp1r1b   | 0.237441 | -0.65503 | -0.56283 | 0.0922   | 6.419163 | 5.888599 | 0.005747 | 0.039389 | 6.664266 | 6.901707 | 6.009239 |
| ILMN_2727847 | 2210407G1 | 0.270083 | -0.2766  | 0.418571 | 0.695173 | 6.246803 | 5.888032 | 0.00575  | 0.039389 | 6.14379  | 6.413873 | 5.867188 |
| ILMN_2659168 | Cib2      | -0.80838 | -0.20495 | -0.50238 | -0.29743 | 6.276725 | 5.887308 | 0.005753 | 0.039394 | 6.655653 | 5.847268 | 6.450702 |
| ILMN_2918114 | Apex1     | 0.163425 | -0.38994 | -0.48758 | -0.09764 | 5.763203 | 5.885652 | 0.005759 | 0.039425 | 5.941729 | 6.105154 | 5.551784 |
| ILMN_2895847 | Mthfs     | -0.63475 | -0.35276 | -0.53502 | -0.18226 | 6.321964 | 5.883124 | 0.00577  | 0.039481 | 6.702595 | 6.067845 | 6.349838 |
| ILMN_2698767 | Cdc20     | 0.455167 | -0.27519 | -0.28465 | -0.00945 | 6.327114 | 5.881646 | 0.005776 | 0.039507 | 6.353283 | 6.80845  | 6.078089 |
| ILMN_3102825 | Ncam1     | -0.53055 | -0.44869 | -0.54929 | -0.1006  | 4.84376  | 5.87961  | 0.005784 | 0.039528 | 5.225892 | 4.695347 | 4.777199 |
| ILMN_2793946 | Csnk1g3   | 0.391955 | 0.248809 | 0.574808 | 0.325999 | 8.882612 | 5.879441 | 0.005785 | 0.039528 | 8.578719 | 8.970674 | 8.827528 |
| ILMN_2732317 | Pik3r2    | 0.282897 | 0.514526 | 0.811023 | 0.296497 | 7.257012 | 5.879258 | 0.005786 | 0.039528 | 6.8549   | 7.137797 | 7.369426 |
| ILMN_2991864 | Ogg1      | -0.72179 | -0.58982 | -0.4197  | 0.170122 | 5.361347 | 5.876796 | 0.005796 | 0.039582 | 5.794173 | 5.072381 | 5.204356 |
| ILMN_2680463 | 1500019G2 | -0.07443 | -0.21917 | -0.58254 | -0.36338 | 7.432967 | 5.875742 | 0.0058   | 0.039596 | 7.652002 | 7.577573 | 7.432834 |
| ILMN_2647627 | Ppp1cb    | -0.63413 | -1.00662 | -0.95308 | 0.053533 | 7.252638 | 5.872959 | 0.005812 | 0.039659 | 7.901095 | 7.266966 | 6.894479 |
| ILMN_2718251 | Csnk1g2   | 0.318416 | 0.398649 | 0.602761 | 0.204112 | 11.541   | 5.871504 | 0.005818 | 0.039684 | 11.21105 | 11.52946 | 11.6097  |
| ILMN_2609568 | Pygo2     | 0.306372 | 0.350125 | 0.603358 | 0.253233 | 9.559956 | 5.870566 | 0.005822 | 0.039695 | 9.244993 | 9.551365 | 9.595118 |
| ILMN_2694320 | Mia2      | 0.888967 | 0.632711 | 0.025307 | -0.6074  | 6.306945 | 5.868077 | 0.005832 | 0.03975  | 5.920199 | 6.809165 | 6.552909 |

|              |           |          |          |          |          |          |          |          |          |          |          |          |
|--------------|-----------|----------|----------|----------|----------|----------|----------|----------|----------|----------|----------|----------|
| ILMN_3005828 | Mrps26    | -0.39758 | -0.36574 | -0.54934 | -0.1836  | 9.394928 | 5.867534 | 0.005834 | 0.03975  | 9.723091 | 9.325516 | 9.357351 |
| ILMN_1228385 | Itpr3     | 0.080769 | -0.01259 | 0.4893   | 0.50189  | 8.138871 | 5.866039 | 0.00584  | 0.039777 | 7.999501 | 8.080271 | 7.986912 |
| ILMN_2630593 | Emd       | -0.10861 | -0.32623 | -0.60729 | -0.28106 | 7.518731 | 5.864286 | 0.005848 | 0.039811 | 7.779265 | 7.670652 | 7.453035 |
| ILMN_2946905 | Slc25a38  | -0.4714  | -0.2643  | -0.30624 | -0.04194 | 10.50794 | 5.863039 | 0.005853 | 0.039826 | 10.76843 | 10.29703 | 10.50413 |
| ILMN_2434144 | Ysg2      | 0.239669 | 0.770935 | 0.974174 | 0.203239 | 5.913347 | 5.862679 | 0.005854 | 0.039826 | 5.417152 | 5.656821 | 6.188087 |
| ILMN_2896049 | Npepl1    | 0.370825 | 0.41209  | 0.339067 | -0.07302 | 10.29172 | 5.862119 | 0.005857 | 0.039826 | 10.01122 | 10.38205 | 10.42331 |
| ILMN_1220418 | Hcst      | -0.73317 | -0.30191 | -0.60008 | -0.29818 | 8.024441 | 5.855158 | 0.005886 | 0.040009 | 8.433231 | 7.700064 | 8.131324 |
| ILMN_1235374 | Decr1     | 0.846043 | 0.554649 | 0.487358 | -0.06729 | 8.054361 | 5.85306  | 0.005895 | 0.04004  | 7.582349 | 8.428392 | 8.136998 |
| ILMN_2711754 | Foxred1   | -0.03285 | -0.4797  | -0.65137 | -0.17167 | 5.519873 | 5.85299  | 0.005895 | 0.04004  | 5.810854 | 5.778007 | 5.33115  |
| ILMN_2763825 | lpmk      | 0.412184 | 0.664447 | 0.901765 | 0.237318 | 9.890534 | 5.851363 | 0.005902 | 0.040071 | 9.395935 | 9.808119 | 10.06038 |
| ILMN_2616956 | 4933434E2 | -0.53735 | -0.40238 | -0.36305 | 0.039326 | 9.095638 | 5.847484 | 0.005918 | 0.040159 | 9.421331 | 8.883985 | 9.018956 |
| ILMN_2962606 | Psma5     | -0.24305 | -0.33519 | -0.49365 | -0.15846 | 12.45309 | 5.847202 | 0.00592  | 0.040159 | 12.72106 | 12.47801 | 12.38587 |
| ILMN_1242204 | Slc5a9    | 0.573537 | 0.611229 | 0.557951 | -0.05328 | 8.300764 | 5.845191 | 0.005928 | 0.040201 | 7.865085 | 8.438622 | 8.476314 |
| ILMN_3015387 | Myo1a     | 1.004366 | 0.320056 | 0.58337  | 0.263314 | 9.184423 | 5.843743 | 0.005934 | 0.040227 | 8.707475 | 9.711841 | 9.027531 |
| ILMN_1251870 | Smarcad1  | -0.2397  | -0.51971 | -0.29619 | 0.223524 | 6.572274 | 5.839199 | 0.005954 | 0.040342 | 6.836176 | 6.596475 | 6.316461 |
| ILMN_1238661 | Trappc3   | -0.47442 | -0.3862  | -0.63343 | -0.24723 | 7.907979 | 5.837724 | 0.00596  | 0.040369 | 8.281489 | 7.80707  | 7.895294 |
| ILMN_1220362 | 2410011GC | -0.37899 | -0.45463 | -0.64141 | -0.18678 | 11.88984 | 5.836917 | 0.005963 | 0.040371 | 12.2586  | 11.87961 | 11.80397 |
| ILMN_2439341 | Vars      | 0.80185  | 0.238128 | 0.393673 | 0.155545 | 7.65945  | 5.836553 | 0.005965 | 0.040371 | 7.301037 | 8.102887 | 7.539165 |
| ILMN_2943319 | 1200003CC | -0.37849 | -0.40757 | -0.48722 | -0.07965 | 8.689325 | 5.834292 | 0.005974 | 0.040421 | 9.007643 | 8.629154 | 8.600075 |
| ILMN_2709681 | Hdlbp     | 0.888458 | 0.04466  | 0.256778 | 0.212118 | 5.897548 | 5.833085 | 0.00598  | 0.04044  | 5.600075 | 6.488533 | 5.644734 |
| ILMN_3138439 | Dyrk2     | 0.61753  | 0.639573 | 0.356197 | -0.28338 | 5.788756 | 5.831565 | 0.005986 | 0.040468 | 5.385431 | 6.002961 | 6.025004 |
| ILMN_2729953 | Ppm1b     | 0.851681 | 0.786701 | 0.328618 | -0.45808 | 6.354614 | 5.830752 | 0.00599  | 0.040476 | 5.862864 | 6.714545 | 6.649565 |
| ILMN_2629528 | Atp9a     | 0.574589 | 0.603777 | 0.315209 | -0.28857 | 7.324511 | 5.828884 | 0.005998 | 0.040501 | 6.951117 | 7.525706 | 7.554894 |
| ILMN_1257102 | Cecr5     | -0.52001 | -0.48781 | -0.27065 | 0.217161 | 6.763003 | 5.828802 | 0.005998 | 0.040501 | 7.082622 | 6.56261  | 6.59481  |
| ILMN_1221935 | Glb1      | 0.351819 | 0.474342 | 0.474935 | 0.000594 | 8.937548 | 5.822389 | 0.006026 | 0.040672 | 8.612274 | 8.964093 | 9.086615 |
| ILMN_2724347 | Acin1     | 0.85577  | 0.27054  | 0.669889 | 0.399349 | 5.070832 | 5.821522 | 0.006029 | 0.040681 | 4.621783 | 5.477552 | 4.892322 |
| ILMN_1215246 | Mccc1     | -0.46009 | -0.43822 | -0.48961 | -0.05139 | 4.637699 | 5.819353 | 0.006039 | 0.040698 | 4.984677 | 4.52459  | 4.546462 |
| ILMN_1228613 | Pycl      | -0.17964 | -0.26004 | -0.51382 | -0.25378 | 10.27953 | 5.819187 | 0.006039 | 0.040698 | 10.5179  | 10.33826 | 10.25786 |
| ILMN_3151642 | Myocd     | -0.07452 | 0.280276 | 0.931097 | 0.650821 | 5.485925 | 5.819008 | 0.00604  | 0.040698 | 5.201711 | 5.127194 | 5.481987 |
| ILMN_2689259 | Pik4cb    | -0.65827 | -0.3757  | -0.49845 | -0.12275 | 8.364992 | 5.818803 | 0.006041 | 0.040698 | 8.748098 | 8.089826 | 8.372399 |
| ILMN_2947568 | Gadd45a   | -0.52736 | -0.81504 | -0.3997  | 0.415335 | 8.769771 | 5.811666 | 0.006072 | 0.04089  | 9.205297 | 8.677936 | 8.390258 |
| ILMN_2609516 | 1300006C1 | 0.49433  | 0.269659 | 0.523251 | 0.253592 | 12.06369 | 5.808361 | 0.006086 | 0.040972 | 11.74188 | 12.23621 | 12.01154 |
| ILMN_2706421 | A430005L1 | -0.40354 | -0.46166 | -0.75482 | -0.29316 | 6.452986 | 5.806736 | 0.006094 | 0.041004 | 6.857989 | 6.454448 | 6.396333 |
| ILMN_1242802 | Rab6      | 0.721783 | 0.235518 | -0.00239 | -0.23791 | 8.637117 | 5.804695 | 0.006102 | 0.041048 | 8.398389 | 9.120172 | 8.633907 |
| ILMN_2725807 | 4932409F1 | 0.355673 | -0.14835 | 0.126115 | 0.27447  | 4.764685 | 5.803305 | 0.006109 | 0.04107  | 4.681327 | 5.037    | 4.532972 |

|              |          |          |          |          |          |          |          |          |          |          |          |          |
|--------------|----------|----------|----------|----------|----------|----------|----------|----------|----------|----------|----------|----------|
| ILMN_2660175 | Fbxo6b   | -0.5365  | -0.23188 | -0.18287 | 0.049003 | 11.08915 | 5.80255  | 0.006112 | 0.04107  | 11.32696 | 10.79046 | 11.09509 |
| ILMN_1225077 | Mical1   | 0.414185 | 0.669027 | 0.702224 | 0.033198 | 7.764571 | 5.802309 | 0.006113 | 0.04107  | 7.318212 | 7.732397 | 7.987239 |
| ILMN_2721357 | Lhfp12   | -0.49168 | 0.143978 | 0.527411 | 0.383433 | 9.617089 | 5.801635 | 0.006116 | 0.041074 | 9.572162 | 9.08048  | 9.71614  |
| ILMN_2651462 | Mus81    | 0.157619 | 0.459944 | -0.14768 | -0.60762 | 5.325608 | 5.800806 | 0.006119 | 0.041083 | 5.208137 | 5.365756 | 5.668081 |
| ILMN_2720763 | BC025546 | -0.43002 | -0.51157 | -0.39656 | 0.115015 | 7.930648 | 5.799283 | 0.006126 | 0.041101 | 8.265186 | 7.835166 | 7.753613 |
| ILMN_1234997 | Crry     | 0.517256 | 0.081985 | -0.12546 | -0.20745 | 7.117052 | 5.798654 | 0.006129 | 0.041101 | 6.998608 | 7.515864 | 7.080593 |
| ILMN_2794460 | Ncoa5    | 0.401693 | 0.192596 | 0.458831 | 0.266235 | 8.248825 | 5.798588 | 0.006129 | 0.041101 | 7.985545 | 8.387238 | 8.178142 |
| ILMN_2939522 | Phtf1    | 0.65654  | 0.333998 | 0.641159 | 0.307162 | 5.279372 | 5.797621 | 0.006133 | 0.041114 | 4.871448 | 5.527988 | 5.205446 |
| ILMN_2740217 | Rasip1   | 0.273262 | 0.485267 | 0.672863 | 0.187596 | 5.358359 | 5.794957 | 0.006145 | 0.041176 | 5.000511 | 5.273774 | 5.485778 |
| ILMN_2711772 | A930021H | 0.297454 | 0.644682 | 0.51515  | -0.12953 | 7.841914 | 5.792714 | 0.006155 | 0.041227 | 7.477592 | 7.775047 | 8.122274 |
| ILMN_1213692 | Pcbp3    | 0.145895 | 0.355491 | 0.560294 | 0.204802 | 4.975102 | 5.790865 | 0.006163 | 0.041266 | 4.709682 | 4.855577 | 5.065173 |
| ILMN_2640357 | Olf1317  | 0.131884 | 0.332155 | -0.21048 | -0.54263 | 4.675099 | 5.788818 | 0.006172 | 0.04131  | 4.611708 | 4.743593 | 4.943864 |
| ILMN_2707771 | Keap1    | 0.574445 | 0.334312 | 0.488847 | 0.154535 | 7.750146 | 5.787873 | 0.006177 | 0.041323 | 7.400745 | 7.97519  | 7.735057 |
| ILMN_3162388 | Bbs5     | -0.6332  | -0.7806  | -0.78123 | -0.00063 | 5.580505 | 5.785678 | 0.006186 | 0.041372 | 6.129261 | 5.496063 | 5.348664 |
| ILMN_2656805 | Acad9    | -0.00505 | -0.4947  | -0.56362 | -0.06891 | 6.663363 | 5.782474 | 0.006201 | 0.041451 | 6.929207 | 6.924156 | 6.434503 |
| ILMN_2668927 | Apod     | -0.47906 | 0.33967  | 0.444316 | 0.104646 | 5.597053 | 5.778993 | 0.006216 | 0.041539 | 5.520822 | 5.041759 | 5.860492 |
| ILMN_2963700 | Sfxn3    | 0.230166 | 0.691136 | 0.278158 | -0.41298 | 5.086612 | 5.77571  | 0.006231 | 0.041621 | 4.786747 | 5.016913 | 5.477883 |
| ILMN_2473122 | Wrb      | -0.44114 | -0.4593  | -0.63628 | -0.17698 | 6.888652 | 5.774588 | 0.006236 | 0.041639 | 7.272833 | 6.831695 | 6.813528 |
| ILMN_2946608 | 2310047M | 0.410578 | 0.530801 | 0.761904 | 0.231103 | 8.542955 | 5.773396 | 0.006241 | 0.041659 | 8.117134 | 8.527713 | 8.647935 |
| ILMN_2604885 | Lmod1    | -0.17111 | 0.34482  | 1.030254 | 0.685434 | 6.564084 | 5.77229  | 0.006246 | 0.041676 | 6.263093 | 6.091982 | 6.607913 |
| ILMN_2642681 | Atf4     | -0.56839 | -0.52167 | -0.52222 | -0.00055 | 10.37857 | 5.770623 | 0.006254 | 0.04171  | 10.78164 | 10.21325 | 10.25997 |
| ILMN_2870672 | Fbln1    | 0.464447 | 0.557698 | 0.648092 | 0.090394 | 11.40932 | 5.767326 | 0.006268 | 0.041766 | 10.99176 | 11.45621 | 11.54946 |
| ILMN_3149944 | Cklf     | -0.30473 | -0.45164 | -0.84284 | -0.3912  | 6.275908 | 5.767167 | 0.006269 | 0.041766 | 6.675713 | 6.370979 | 6.224071 |
| ILMN_2946440 | Rab24    | -0.54553 | -0.14533 | -0.0715  | 0.073829 | 8.960243 | 5.767141 | 0.006269 | 0.041766 | 9.150832 | 8.605301 | 9.005504 |
| ILMN_2688378 | Nol1     | 0.7282   | 0.272463 | 0.106783 | -0.16568 | 6.307268 | 5.766492 | 0.006272 | 0.04177  | 6.030406 | 6.758606 | 6.30287  |
| ILMN_1214810 | Arf2     | -0.44821 | -0.25061 | -0.06439 | 0.186214 | 8.621573 | 5.764615 | 0.006281 | 0.041796 | 8.812375 | 8.364168 | 8.561767 |
| ILMN_2716567 | Bnip3l   | -0.71861 | -0.33397 | -0.3691  | -0.03513 | 10.13217 | 5.76433  | 0.006282 | 0.041796 | 10.4876  | 9.768983 | 10.15362 |
| ILMN_2815889 | Grwd1    | 0.314965 | -0.40634 | -0.19133 | 0.215012 | 5.6812   | 5.763606 | 0.006285 | 0.041796 | 5.751875 | 6.066841 | 5.345536 |
| ILMN_1246201 | Cacna1h  | 0.026313 | 0.309359 | 0.833805 | 0.524446 | 7.131141 | 5.763491 | 0.006286 | 0.041796 | 6.838771 | 6.865084 | 7.14813  |
| ILMN_2867147 | Tyropb   | -0.65523 | -0.21788 | -0.60516 | -0.38729 | 7.913395 | 5.762675 | 0.006289 | 0.041805 | 8.282963 | 7.627733 | 8.065085 |
| ILMN_1235735 | Slco3a1  | 0.662581 | 0.16824  | 0.379475 | 0.211235 | 5.046259 | 5.761091 | 0.006297 | 0.041836 | 4.743685 | 5.406266 | 4.911925 |
| ILMN_2771766 | Ccl12    | -0.966   | -0.42216 | -0.49979 | -0.07763 | 5.541767 | 5.760321 | 0.0063   | 0.041844 | 6.013756 | 5.047753 | 5.591594 |
| ILMN_2957614 | Adss     | 0.407555 | -0.12109 | -0.42565 | -0.30457 | 8.899531 | 5.757375 | 0.006313 | 0.041903 | 8.934327 | 9.341883 | 8.81324  |
| ILMN_2896601 | Icam1    | 0.432175 | 0.639669 | 0.52497  | -0.1147  | 6.857243 | 5.757299 | 0.006314 | 0.041903 | 6.45804  | 6.890215 | 7.097709 |
| ILMN_1221684 | Scp2     | 0.7478   | 0.178058 | 0.062714 | -0.11534 | 8.353223 | 5.756433 | 0.006318 | 0.041903 | 8.106079 | 8.853879 | 8.284138 |

|              |           |          |          |          |          |          |          |          |          |          |          |          |
|--------------|-----------|----------|----------|----------|----------|----------|----------|----------|----------|----------|----------|----------|
| ILMN_2596522 | Mt1       | 1.104926 | 0.895877 | 1.050264 | 0.154386 | 13.39495 | 5.756218 | 0.006319 | 0.041903 | 12.63218 | 13.73711 | 13.52806 |
| ILMN_2748708 | Papd1     | -0.52878 | -0.53496 | -0.4901  | 0.044859 | 6.606048 | 5.754337 | 0.006327 | 0.041927 | 6.994509 | 6.465726 | 6.459549 |
| ILMN_2774486 | Bcdo2     | 0.822337 | 0.415986 | 0.217219 | -0.19877 | 9.256829 | 5.753954 | 0.006329 | 0.041927 | 8.892943 | 9.71528  | 9.308929 |
| ILMN_2667842 | Tbrg1     | 0.029752 | -0.37751 | -0.43289 | -0.05537 | 10.60776 | 5.752919 | 0.006334 | 0.041927 | 10.80292 | 10.83267 | 10.42541 |
| ILMN_2606973 | AV028368  | 0.810624 | 0.511285 | 0.700269 | 0.188984 | 5.971336 | 5.752866 | 0.006334 | 0.041927 | 5.465791 | 6.276415 | 5.977076 |
| ILMN_2727437 | 0610031J0 | 0.5013   | 0.69015  | 0.412936 | -0.27721 | 7.304071 | 5.751833 | 0.006339 | 0.041927 | 6.902974 | 7.404274 | 7.593124 |
| ILMN_2604904 | Slc2a2    | 1.405217 | 0.416804 | 0.480219 | 0.063415 | 9.25986  | 5.751807 | 0.006339 | 0.041927 | 8.6843   | 10.08952 | 9.101104 |
| ILMN_3132898 | Ypel3     | -0.02967 | 0.46242  | 0.65069  | 0.188271 | 10.94481 | 5.751741 | 0.006339 | 0.041927 | 10.67395 | 10.64428 | 11.13637 |
| ILMN_2675874 | Alas2     | -0.53148 | -0.6517  | -0.63206 | 0.019638 | 4.780774 | 5.749612 | 0.006349 | 0.041975 | 5.234586 | 4.703103 | 4.582884 |
| ILMN_2972371 | Paf1      | 0.489305 | -0.07985 | -0.00719 | 0.07266  | 6.786376 | 5.74768  | 0.006358 | 0.042018 | 6.685811 | 7.175117 | 6.605958 |
| ILMN_1229161 | Eng       | 0.325092 | 0.486961 | 0.792212 | 0.305251 | 6.512568 | 5.746856 | 0.006361 | 0.042027 | 6.111502 | 6.436594 | 6.598463 |
| ILMN_2607474 | Abcd4     | 0.47872  | 0.498875 | 0.572296 | 0.073422 | 6.19485  | 5.745331 | 0.006368 | 0.042057 | 5.807377 | 6.286098 | 6.306252 |
| ILMN_3154419 | P2ry14    | -1.03789 | -0.50505 | -0.20893 | 0.296117 | 8.021639 | 5.744724 | 0.006371 | 0.042059 | 8.459607 | 7.421718 | 7.954556 |
| ILMN_1247242 | Sdccag1   | 0.573101 | -0.06656 | 0.154941 | 0.221497 | 6.228315 | 5.7441   | 0.006374 | 0.042062 | 6.062943 | 6.636044 | 5.996387 |
| ILMN_2769285 | Sema6b    | 0.443478 | 0.474383 | 0.42135  | -0.05303 | 5.865118 | 5.740197 | 0.006392 | 0.042162 | 5.530315 | 5.973793 | 6.004698 |
| ILMN_2985497 | Birc1b    | -0.75078 | -0.69476 | -0.53499 | 0.15977  | 7.960039 | 5.739765 | 0.006394 | 0.042162 | 8.455168 | 7.704393 | 7.760413 |
| ILMN_1260064 | Pfn2      | -0.69526 | -0.39114 | -0.09722 | 0.293923 | 6.051532 | 5.738362 | 0.006401 | 0.042189 | 6.347439 | 5.652175 | 5.956296 |
| ILMN_1218205 | Taf5      | -0.63895 | -0.49642 | -0.41649 | 0.079927 | 6.700923 | 5.735851 | 0.006412 | 0.042243 | 7.088888 | 6.449934 | 6.592471 |
| ILMN_2501267 | Tmc7      | 0.827997 | 0.913478 | 0.5636   | -0.34988 | 8.236213 | 5.735245 | 0.006415 | 0.042243 | 7.659944 | 8.487942 | 8.573422 |
| ILMN_2826157 | Taf12     | -0.44067 | -0.41289 | -0.36407 | 0.048819 | 8.92036  | 5.735016 | 0.006416 | 0.042243 | 9.224768 | 8.784094 | 8.811879 |
| ILMN_2634108 | Ap1s1     | -0.58346 | -0.37911 | -0.56634 | -0.18723 | 9.015818 | 5.733138 | 0.006425 | 0.042284 | 9.398048 | 8.814586 | 9.018934 |
| ILMN_2680549 | Pik3cb    | 0.635219 | 0.317181 | 0.583611 | 0.26643  | 7.703322 | 5.732591 | 0.006427 | 0.042285 | 7.319319 | 7.954538 | 7.6365   |
| ILMN_2736611 | Gtf2f2    | -0.42874 | -0.44198 | -0.48434 | -0.04236 | 10.21594 | 5.729438 | 0.006442 | 0.042359 | 10.5547  | 10.12596 | 10.11272 |
| ILMN_1244130 | Pon3      | -0.42325 | -0.85271 | -0.55756 | 0.295149 | 5.351801 | 5.729088 | 0.006443 | 0.042359 | 5.810183 | 5.386932 | 4.957471 |
| ILMN_2628629 | Cdh1      | 0.38406  | 0.47064  | 0.658861 | 0.188221 | 9.725757 | 5.72778  | 0.00645  | 0.042383 | 9.347367 | 9.731427 | 9.818007 |
| ILMN_2662934 | Reg3g     | -2.87821 | -3.54583 | -1.19544 | 2.350392 | 8.431078 | 5.727156 | 0.006452 | 0.042387 | 10.33595 | 7.457736 | 6.790117 |
| ILMN_2672147 | 9130214HC | 0.364957 | 1.139191 | 0.87063  | -0.26856 | 8.292519 | 5.724584 | 0.006464 | 0.04244  | 7.698825 | 8.063782 | 8.838016 |
| ILMN_1234905 | Polr2e    | 0.233836 | 0.052888 | -0.29304 | -0.34593 | 8.907115 | 5.724091 | 0.006467 | 0.04244  | 8.908694 | 9.14253  | 8.961582 |
| ILMN_2640239 | Pqlc3     | 0.190825 | -0.31057 | -0.61462 | -0.30405 | 6.696306 | 5.72385  | 0.006468 | 0.04244  | 6.879898 | 7.070722 | 6.569328 |
| ILMN_2806720 | Rbks      | -0.37575 | -0.40242 | -0.53622 | -0.1338  | 9.309473 | 5.722862 | 0.006472 | 0.042454 | 9.63807  | 9.262322 | 9.235651 |
| ILMN_3121687 | 1700029P1 | -0.50174 | -0.34291 | -0.52042 | -0.17751 | 8.817175 | 5.719911 | 0.006486 | 0.042528 | 9.158443 | 8.656705 | 8.815531 |
| ILMN_2692960 | 1300013B2 | 1.000432 | 0.666345 | 0.383499 | -0.28285 | 6.981287 | 5.712798 | 0.00652  | 0.042731 | 6.468718 | 7.46915  | 7.135063 |
| ILMN_2588521 | 1200016D2 | 0.432093 | 0.553222 | 0.450938 | -0.10228 | 6.982668 | 5.71118  | 0.006527 | 0.042765 | 6.623605 | 7.055697 | 7.176826 |
| ILMN_2708877 | AA960558  | 0.082082 | 0.386999 | 0.601861 | 0.214862 | 11.30024 | 5.710254 | 0.006532 | 0.042778 | 11.0325  | 11.11458 | 11.4195  |
| ILMN_2810443 | 2610204K1 | -0.35632 | -0.44182 | -0.49609 | -0.05428 | 7.300704 | 5.708553 | 0.00654  | 0.042814 | 7.62426  | 7.267943 | 7.182445 |

|              |           |          |          |          |          |          |          |          |          |          |          |          |
|--------------|-----------|----------|----------|----------|----------|----------|----------|----------|----------|----------|----------|----------|
| ILMN_2823778 | Sc4mol    | -0.55485 | -0.5878  | -0.63807 | -0.05027 | 10.36972 | 5.706256 | 0.006551 | 0.042856 | 10.8149  | 10.26005 | 10.2271  |
| ILMN_2699624 | 2310008HC | -0.51778 | -0.54176 | -0.69758 | -0.15583 | 5.909569 | 5.705808 | 0.006553 | 0.042856 | 6.348849 | 5.831067 | 5.807092 |
| ILMN_2893605 | 1300018P1 | -0.69233 | -0.5037  | -0.20804 | 0.295657 | 7.169906 | 5.705643 | 0.006553 | 0.042856 | 7.520922 | 6.828595 | 7.017225 |
| ILMN_1233040 | Lemd2     | 0.309345 | 0.307095 | 0.555011 | 0.247916 | 10.03025 | 5.704603 | 0.006558 | 0.042866 | 9.737386 | 10.04673 | 10.04448 |
| ILMN_2637661 | Prpf8     | 0.828375 | 0.11302  | 0.595103 | 0.482083 | 5.080123 | 5.704285 | 0.00656  | 0.042866 | 4.695999 | 5.524374 | 4.809018 |
| ILMN_2895991 | 2610205H1 | -0.87425 | -0.78806 | -0.75381 | 0.034256 | 8.160001 | 5.702717 | 0.006567 | 0.042882 | 8.76403  | 7.88978  | 7.975969 |
| ILMN_1252364 | Furin     | 0.429239 | 0.836063 | 0.604629 | -0.23143 | 5.048443 | 5.702598 | 0.006568 | 0.042882 | 4.58096  | 5.010199 | 5.417023 |
| ILMN_1239645 | Sf3b2     | 0.503038 | 0.187286 | 0.43167  | 0.244384 | 10.22041 | 5.702046 | 0.006571 | 0.042882 | 9.939907 | 10.44294 | 10.12719 |
| ILMN_2681805 | Ly64      | 0.590833 | 0.57698  | 0.53844  | -0.03854 | 12.83089 | 5.701696 | 0.006572 | 0.042882 | 12.40433 | 12.99516 | 12.98131 |
| ILMN_1232989 | Ehd3      | 0.471123 | 0.55776  | 0.58742  | 0.02966  | 5.204773 | 5.69992  | 0.006581 | 0.042921 | 4.800697 | 5.27182  | 5.358457 |
| ILMN_2819558 | Bach2     | 0.503208 | 0.561257 | 0.834524 | 0.273267 | 5.392746 | 5.69733  | 0.006593 | 0.042973 | 4.917999 | 5.421207 | 5.479256 |
| ILMN_3129206 | D4Ertd22e | 0.237879 | 0.367005 | 0.513419 | 0.146414 | 11.02064 | 5.69721  | 0.006594 | 0.042973 | 10.74107 | 10.97894 | 11.10807 |
| ILMN_2856986 | Scg3      | 0.690405 | 0.415369 | 0.354376 | -0.06099 | 5.216454 | 5.695972 | 0.006599 | 0.042995 | 4.851417 | 5.541822 | 5.266786 |
| ILMN_2769777 | Msc       | -0.76107 | 0.091775 | -0.02469 | -0.11647 | 7.315506 | 5.69379  | 0.00661  | 0.043047 | 7.489004 | 6.72793  | 7.580779 |
| ILMN_2939295 | Fis1      | -0.45036 | -0.31386 | -0.41536 | -0.10149 | 11.80996 | 5.692767 | 0.006615 | 0.043058 | 12.10485 | 11.65449 | 11.79099 |
| ILMN_2709279 | 4930538D1 | 0.622991 | 0.531994 | 0.42648  | -0.10551 | 7.242023 | 5.692397 | 0.006617 | 0.043058 | 6.846657 | 7.469648 | 7.378651 |
| ILMN_2625377 | Rgs1      | -0.83046 | -0.60728 | -0.67511 | -0.06783 | 7.441308 | 5.691437 | 0.006621 | 0.043072 | 7.969521 | 7.139063 | 7.362236 |
| ILMN_2760979 | Tgfbr2    | 0.642029 | 0.670971 | 0.920145 | 0.249174 | 9.507566 | 5.690168 | 0.006627 | 0.043083 | 8.949279 | 9.591309 | 9.62025  |
| ILMN_1229082 | 1810045KC | 0.532813 | 0.488596 | 0.566336 | 0.07774  | 8.141914 | 5.69005  | 0.006628 | 0.043083 | 7.744978 | 8.277791 | 8.233574 |
| ILMN_1259473 | Fen1      | 0.387046 | -0.29686 | -0.29371 | 0.00315  | 8.991674 | 5.686781 | 0.006643 | 0.043169 | 9.042557 | 9.429603 | 8.745694 |
| ILMN_2767949 | D14Ertd23 | 0.557201 | 0.060704 | 0.074872 | 0.014168 | 5.134972 | 5.684774 | 0.006653 | 0.043216 | 4.961778 | 5.518979 | 5.022482 |
| ILMN_2860196 | Farsb     | 0.575214 | 0.007058 | -0.00623 | -0.01329 | 10.58203 | 5.680996 | 0.006671 | 0.043307 | 10.43802 | 11.01324 | 10.44508 |
| ILMN_2440066 | Tpra40    | 0.324491 | 0.425566 | 0.390869 | -0.0347  | 7.323122 | 5.68083  | 0.006672 | 0.043307 | 7.03789  | 7.362381 | 7.463456 |
| ILMN_2679770 | Mrpl9     | -0.29226 | -0.33261 | -0.48044 | -0.14783 | 9.549912 | 5.678845 | 0.006682 | 0.043353 | 9.826242 | 9.533978 | 9.493629 |
| ILMN_2695217 | 2810485IO | -0.70736 | -0.3094  | -0.14683 | 0.16257  | 8.888271 | 5.677668 | 0.006687 | 0.043374 | 9.179168 | 8.471807 | 8.869769 |
| ILMN_1216883 | 1300006N2 | 0.672744 | 0.402804 | 0.519445 | 0.116642 | 6.745095 | 5.676874 | 0.006691 | 0.043374 | 6.346347 | 7.019091 | 6.749151 |
| ILMN_2721809 | Mapk14    | 0.539661 | 0.286162 | 0.480141 | 0.193979 | 8.966813 | 5.676645 | 0.006692 | 0.043374 | 8.640322 | 9.179983 | 8.926484 |
| ILMN_2888181 | Echs1     | -0.29876 | -0.37876 | -0.54351 | -0.16475 | 10.691   | 5.672643 | 0.006712 | 0.04348  | 10.99625 | 10.69749 | 10.61749 |
| ILMN_2592358 | Gbif      | -0.36389 | -0.56188 | -0.39202 | 0.169858 | 8.203659 | 5.672235 | 0.006714 | 0.04348  | 8.533107 | 8.16922  | 7.971225 |
| ILMN_1219717 | Sort1     | 0.724613 | 0.222092 | 0.873646 | 0.651554 | 10.12099 | 5.670381 | 0.006723 | 0.043522 | 9.6659   | 10.39051 | 9.887991 |
| ILMN_2673233 | Pfkip     | 1.187379 | 0.145273 | 0.322045 | 0.176772 | 8.639101 | 5.669239 | 0.006728 | 0.043542 | 8.225426 | 9.412805 | 8.3707   |
| ILMN_2955818 | Ugt2b36   | 0.261594 | 0.435192 | -0.61989 | -1.05508 | 8.654474 | 5.665715 | 0.006746 | 0.043619 | 8.635249 | 8.896843 | 9.070442 |
| ILMN_2982781 | Kcnk5     | 0.575961 | 0.326531 | 0.369153 | 0.042622 | 11.12321 | 5.665465 | 0.006747 | 0.043619 | 10.8053  | 11.38126 | 11.13183 |
| ILMN_1235186 | Cox15     | 0.526034 | 0.117419 | 0.016656 | -0.10076 | 8.267035 | 5.665269 | 0.006748 | 0.043619 | 8.102007 | 8.628041 | 8.219426 |
| ILMN_2939303 | Pcyt2     | 0.325248 | 0.54191  | 0.579869 | 0.037959 | 10.98807 | 5.662091 | 0.006763 | 0.043703 | 10.62631 | 10.95156 | 11.16822 |

|              |           |          |          |          |          |          |          |          |          |          |          |          |
|--------------|-----------|----------|----------|----------|----------|----------|----------|----------|----------|----------|----------|----------|
| ILMN_2418128 | Zipro1    | -0.72878 | -0.37889 | -0.38139 | -0.00249 | 5.77052  | 5.661522 | 0.006766 | 0.043705 | 6.142783 | 5.414007 | 5.763892 |
| ILMN_2738345 | Lims2     | 0.793387 | 1.015304 | 1.267774 | 0.25247  | 7.683079 | 5.660368 | 0.006772 | 0.043725 | 6.913963 | 7.707349 | 7.929267 |
| ILMN_2764781 | Pls3      | -0.29141 | -0.17534 | 0.396853 | 0.572196 | 5.398753 | 5.658874 | 0.006779 | 0.043757 | 5.416227 | 5.124819 | 5.240884 |
| ILMN_1218651 | Dnmbp     | 0.838736 | 0.636893 | 0.773671 | 0.136779 | 6.531961 | 5.65762  | 0.006785 | 0.04378  | 5.969637 | 6.808372 | 6.606529 |
| ILMN_2882164 | Thrap3    | 0.511267 | 0.115526 | 0.039051 | -0.07647 | 4.654506 | 5.655565 | 0.006795 | 0.043829 | 4.488045 | 4.999312 | 4.603571 |
| ILMN_1237074 | Slc25a19  | -0.54497 | -0.26318 | -0.29199 | -0.02881 | 8.141792 | 5.65304  | 0.006808 | 0.043887 | 8.416829 | 7.871856 | 8.153649 |
| ILMN_1239507 | Mrpl15    | -0.74278 | -0.78095 | -0.46278 | 0.318175 | 7.089215 | 5.652588 | 0.00681  | 0.043887 | 7.585844 | 6.843062 | 6.80489  |
| ILMN_1250689 | Rgs9      | 0.174924 | 0.846593 | 0.598095 | -0.2485  | 6.005452 | 5.652221 | 0.006812 | 0.043887 | 5.600549 | 5.775473 | 6.447141 |
| ILMN_2803344 | Tmem143   | 0.595839 | 0.565941 | 0.360715 | -0.20523 | 7.773053 | 5.649879 | 0.006824 | 0.043945 | 7.392428 | 7.988268 | 7.95837  |
| ILMN_2891688 | O610010E2 | -0.74509 | -0.66462 | -0.60327 | 0.061349 | 8.588916 | 5.64937  | 0.006826 | 0.043945 | 9.092161 | 8.347069 | 8.427542 |
| ILMN_2682787 | Cops7a    | -0.19906 | -0.24009 | -0.55255 | -0.31247 | 7.734716 | 5.64866  | 0.00683  | 0.043952 | 7.982641 | 7.783583 | 7.742553 |
| ILMN_2859613 | Ogn       | -0.77781 | 0.187787 | 0.332758 | 0.144971 | 9.027317 | 5.648101 | 0.006832 | 0.043953 | 9.091635 | 8.313821 | 9.279422 |
| ILMN_2688653 | Epha2     | 0.627161 | 0.650714 | 0.484573 | -0.16614 | 5.97798  | 5.646657 | 0.00684  | 0.04397  | 5.537368 | 6.164529 | 6.188082 |
| ILMN_2716968 | 9130217G2 | 0.320596 | 0.638173 | 0.769635 | 0.131462 | 5.968878 | 5.646402 | 0.006841 | 0.04397  | 5.536777 | 5.857373 | 6.174949 |
| ILMN_2725835 | Ptp4a2    | -0.59991 | -0.8526  | -0.43557 | 0.417034 | 6.385072 | 5.646066 | 0.006842 | 0.04397  | 6.857091 | 6.257183 | 6.004491 |
| ILMN_1259684 | Endogl1   | -0.112   | -0.54741 | -0.40097 | 0.146439 | 6.203409 | 5.644813 | 0.006849 | 0.043989 | 6.468506 | 6.356503 | 5.921093 |
| ILMN_2944870 | Klhl5     | -0.5482  | -0.34988 | -0.34194 | 0.007938 | 4.700301 | 5.644452 | 0.00685  | 0.043989 | 5.010306 | 4.462108 | 4.660426 |
| ILMN_2949596 | Dpysl2    | 0.642379 | 0.37463  | 0.803759 | 0.429129 | 9.569468 | 5.643345 | 0.006856 | 0.044008 | 9.114276 | 9.756655 | 9.488906 |
| ILMN_1235757 | Bloc1s1   | -0.60124 | -0.2687  | -0.4757  | -0.207   | 10.6852  | 5.642281 | 0.006861 | 0.044026 | 11.02161 | 10.42037 | 10.75291 |
| ILMN_2753057 | Hars2     | -0.75407 | -0.8182  | -0.90214 | -0.08394 | 5.892572 | 5.638454 | 0.00688  | 0.044132 | 6.511175 | 5.757106 | 5.692973 |
| ILMN_1215849 | Dpp8      | 0.553182 | 0.271933 | 0.230697 | -0.04124 | 8.170857 | 5.636584 | 0.00689  | 0.044176 | 7.906904 | 8.460086 | 8.178837 |
| ILMN_2806188 | Zdhhc13   | 0.207256 | -0.23061 | -0.39051 | -0.1599  | 9.135672 | 5.633991 | 0.006903 | 0.044243 | 9.239137 | 9.446393 | 9.008531 |
| ILMN_2620323 | Tex14     | -0.96658 | -0.78273 | -0.73266 | 0.050073 | 5.206718 | 5.630599 | 0.00692  | 0.044336 | 5.82721  | 4.860626 | 5.044482 |
| ILMN_2594807 | 4933434E2 | -0.73219 | -0.86814 | -0.64573 | 0.222401 | 5.367697 | 5.62992  | 0.006923 | 0.044337 | 5.929212 | 5.19702  | 5.061077 |
| ILMN_1248340 | D16Bwg15  | 0.399057 | -0.21735 | -0.22156 | -0.00422 | 5.492018 | 5.62928  | 0.006926 | 0.044337 | 5.501982 | 5.901039 | 5.284635 |
| ILMN_2821460 | Ptpn18    | -0.66046 | -0.52236 | -0.52759 | -0.00523 | 7.987897 | 5.629041 | 0.006928 | 0.044337 | 8.415498 | 7.755036 | 7.893142 |
| ILMN_3041906 | Timm9     | 0.259282 | 0.011358 | -0.37221 | -0.38356 | 5.100345 | 5.625801 | 0.006944 | 0.044425 | 5.125736 | 5.385018 | 5.137094 |
| ILMN_2924419 | H2-Q7     | 0.634071 | 1.034456 | 0.606845 | -0.42761 | 9.567528 | 5.624786 | 0.006949 | 0.04443  | 8.998685 | 9.632756 | 10.03314 |
| ILMN_2748680 | Fhit      | -0.75785 | -0.96233 | -0.68702 | 0.27531  | 5.979233 | 5.62444  | 0.006951 | 0.04443  | 6.58103  | 5.823182 | 5.618704 |
| ILMN_2673790 | AV249152  | -0.36249 | -0.54123 | -0.1118  | 0.429432 | 5.066025 | 5.624121 | 0.006952 | 0.04443  | 5.319905 | 4.957417 | 4.778672 |
| ILMN_2954824 | Ppp1r1b   | 0.357024 | -0.20273 | 0.113847 | 0.316578 | 11.77124 | 5.62203  | 0.006963 | 0.044482 | 11.7042  | 12.06123 | 11.50147 |
| ILMN_2612774 | Hrbl      | -0.15567 | 0.233135 | 0.649185 | 0.41605  | 7.582461 | 5.620536 | 0.006971 | 0.0445   | 7.400798 | 7.245131 | 7.633933 |
| ILMN_2974480 | Snip1     | -0.437   | -0.44406 | -0.48691 | -0.04285 | 7.973529 | 5.620444 | 0.006971 | 0.0445   | 8.315521 | 7.878524 | 7.87146  |
| ILMN_1212693 | E130307J0 | 0.512223 | 0.741762 | 0.523081 | -0.21868 | 5.214708 | 5.619873 | 0.006974 | 0.044503 | 4.770442 | 5.282664 | 5.512203 |
| ILMN_2656071 | 1810059G2 | -0.45923 | -0.18467 | -0.39014 | -0.20547 | 8.56259  | 5.618553 | 0.006981 | 0.044529 | 8.821099 | 8.361873 | 8.636428 |

|              |           |          |          |          |          |          |          |          |          |          |          |          |
|--------------|-----------|----------|----------|----------|----------|----------|----------|----------|----------|----------|----------|----------|
| ILMN_2702101 | Pld3      | 0.70629  | 0.518126 | 0.52609  | 0.007963 | 6.94409  | 5.617075 | 0.006988 | 0.044552 | 6.506463 | 7.212754 | 7.02459  |
| ILMN_2896492 | 2610003J0 | 0.592904 | 0.402404 | 0.363229 | -0.03917 | 8.794231 | 5.616837 | 0.006989 | 0.044552 | 8.454596 | 9.0475   | 8.857    |
| ILMN_1252919 | Lman2     | 0.355745 | 0.373055 | 0.457596 | 0.084541 | 9.658559 | 5.614971 | 0.006999 | 0.044596 | 9.36196  | 9.717705 | 9.735014 |
| ILMN_3160517 | Cox17     | -0.49699 | -0.24446 | -0.43803 | -0.19357 | 12.46684 | 5.611316 | 0.007018 | 0.044699 | 12.76171 | 12.26472 | 12.51726 |
| ILMN_2614161 | Lss       | -0.2173  | -0.88326 | -0.45655 | 0.426708 | 6.915189 | 5.608387 | 0.007033 | 0.044778 | 7.304465 | 7.087169 | 6.421206 |
| ILMN_2990197 | Bola3     | -0.61962 | -0.53867 | -0.70191 | -0.16324 | 10.54437 | 5.606799 | 0.007041 | 0.044811 | 11.00942 | 10.3898  | 10.47075 |
| ILMN_3088934 | 2700094K1 | -0.67022 | -0.28664 | -0.35203 | -0.06539 | 11.38179 | 5.606359 | 0.007043 | 0.044811 | 11.70901 | 11.0388  | 11.42238 |
| ILMN_3146204 | Ndor1     | -1.05396 | -1.04144 | -0.47908 | 0.562361 | 7.025609 | 5.604538 | 0.007052 | 0.044854 | 7.669227 | 6.615269 | 6.62779  |
| ILMN_2766720 | Coq6      | -0.08565 | -0.32986 | -0.43012 | -0.10026 | 10.23319 | 5.603335 | 0.007058 | 0.044877 | 10.4446  | 10.35895 | 10.11474 |
| ILMN_2818189 | Thrap4    | 0.643662 | 0.293471 | 0.551226 | 0.257755 | 8.167317 | 5.60059  | 0.007073 | 0.044951 | 7.795227 | 8.438889 | 8.088699 |
| ILMN_2699148 | Olf1412   | 0.799857 | 0.35281  | 0.354246 | 0.001436 | 5.162981 | 5.599718 | 0.007077 | 0.044963 | 4.786253 | 5.58611  | 5.139063 |
| ILMN_2627441 | Peli1     | -0.07208 | -0.59098 | 0.060842 | 0.651822 | 6.75844  | 5.595493 | 0.007099 | 0.045085 | 6.908995 | 6.836914 | 6.318015 |
| ILMN_3133835 | Magi1     | 0.288018 | 0.374478 | 0.611469 | 0.23699  | 5.188131 | 5.593499 | 0.007109 | 0.045134 | 4.869639 | 5.157657 | 5.244118 |
| ILMN_2920708 | Zc3h7a    | -0.57075 | -0.40222 | -0.11462 | 0.287598 | 6.401591 | 5.588341 | 0.007136 | 0.045283 | 6.673491 | 6.102737 | 6.271269 |
| ILMN_2933431 | Pps       | 0.188634 | 0.350045 | 0.541892 | 0.191847 | 7.166718 | 5.587982 | 0.007138 | 0.045283 | 6.896576 | 7.08521  | 7.246621 |
| ILMN_2683794 | Oaz2      | -0.02608 | 0.400102 | 0.438186 | 0.038085 | 7.801352 | 5.586678 | 0.007145 | 0.045305 | 7.598298 | 7.572222 | 7.9984   |
| ILMN_1231873 | 1110032D1 | -0.70022 | -0.26641 | -0.70997 | -0.44355 | 5.314997 | 5.586252 | 0.007147 | 0.045305 | 5.734146 | 5.033926 | 5.467734 |
| ILMN_2603178 | Tfam      | -0.46271 | -0.45872 | -0.72214 | -0.26342 | 8.626502 | 5.585802 | 0.007149 | 0.045305 | 9.037394 | 8.574686 | 8.578674 |
| ILMN_2705407 | Pabpc1    | 0.968154 | 0.424977 | 0.453991 | 0.029014 | 6.672678 | 5.582126 | 0.007168 | 0.045398 | 6.210898 | 7.179052 | 6.635875 |
| ILMN_1228748 | Foxa3     | -0.29159 | -0.54599 | -0.31858 | 0.227408 | 10.01043 | 5.582004 | 0.007169 | 0.045398 | 10.29947 | 10.00787 | 9.753482 |
| ILMN_3006729 | Olf1052   | 0.30942  | 0.430502 | 0.022778 | -0.40772 | 4.586    | 5.579673 | 0.007181 | 0.045459 | 4.395325 | 4.704745 | 4.825827 |
| ILMN_3113686 | Hps5      | 0.688766 | -0.36766 | -0.30873 | 0.058921 | 6.881086 | 5.57867  | 0.007187 | 0.045476 | 6.877992 | 7.566758 | 6.510337 |
| ILMN_2795949 | D2Ertd750 | -0.50304 | -0.51105 | -0.65384 | -0.14279 | 6.744789 | 5.575274 | 0.007204 | 0.045561 | 7.161771 | 6.658734 | 6.650718 |
| ILMN_2765936 | 5730472N0 | 0.722601 | 0.663147 | 0.337029 | -0.32612 | 9.332209 | 5.574217 | 0.00721  | 0.045561 | 8.901515 | 9.624116 | 9.564662 |
| ILMN_3120014 | Sri       | -0.41296 | -0.45145 | -0.40512 | 0.046334 | 11.32159 | 5.574128 | 0.00721  | 0.045561 | 11.63897 | 11.22601 | 11.18752 |
| ILMN_2675740 | C730026E2 | -0.16482 | -0.4697  | -0.66636 | -0.19666 | 6.776569 | 5.574076 | 0.007211 | 0.045561 | 7.101791 | 6.936972 | 6.632087 |
| ILMN_2809334 | Zfp37     | -0.94495 | -0.53076 | -0.32576 | 0.205001 | 5.451376 | 5.573499 | 0.007214 | 0.045561 | 5.901742 | 4.95679  | 5.370986 |
| ILMN_2677494 | Drg2      | 0.382145 | -0.02528 | 0.202975 | 0.228258 | 8.344497 | 5.572965 | 0.007217 | 0.045561 | 8.204538 | 8.586683 | 8.179255 |
| ILMN_2699167 | Etfa      | 0.143116 | -0.0858  | -0.49561 | -0.40981 | 10.37763 | 5.572629 | 0.007218 | 0.045561 | 10.48721 | 10.63032 | 10.40141 |
| ILMN_1239208 | Rgs3      | 0.429068 | 0.370737 | 0.420852 | 0.050115 | 7.383355 | 5.568633 | 0.007239 | 0.045677 | 7.078191 | 7.507258 | 7.448927 |
| ILMN_1231396 | Sertad3   | -0.63572 | -0.21948 | -0.19002 | 0.029458 | 7.960108 | 5.552464 | 0.007325 | 0.046204 | 8.221411 | 7.585693 | 8.001934 |
| ILMN_1232458 | C1qtnf2   | -0.84647 | -0.25753 | -0.28795 | -0.03042 | 6.616766 | 5.551444 | 0.007331 | 0.046221 | 6.964755 | 6.118283 | 6.707222 |
| ILMN_2775655 | Akap1     | 0.573983 | 0.41468  | 0.181724 | -0.23296 | 5.917303 | 5.550598 | 0.007335 | 0.046233 | 5.624706 | 6.198689 | 6.039386 |
| ILMN_2714031 | 1300002F1 | 0.731957 | 0.749808 | 0.371074 | -0.37873 | 10.14456 | 5.549375 | 0.007342 | 0.046258 | 9.68135  | 10.41331 | 10.43116 |
| ILMN_1234453 | Rbm3      | -0.19222 | -0.36968 | -0.82483 | -0.45515 | 11.44849 | 5.547566 | 0.007352 | 0.046302 | 11.79518 | 11.60296 | 11.42549 |

|              |           |          |          |          |          |          |          |          |          |          |          |          |
|--------------|-----------|----------|----------|----------|----------|----------|----------|----------|----------|----------|----------|----------|
| ILMN_2637953 | Plcb3     | 0.43284  | 0.102723 | 0.354972 | 0.25225  | 10.96097 | 5.542993 | 0.007376 | 0.046441 | 10.73833 | 11.17117 | 10.84105 |
| ILMN_2707079 | Sirt5     | 0.618711 | 0.188475 | -0.0189  | -0.20738 | 5.478992 | 5.542001 | 0.007382 | 0.046458 | 5.28192  | 5.900632 | 5.470396 |
| ILMN_2992836 | Zfp87     | 0.273295 | 0.278514 | 0.528149 | 0.249635 | 7.257018 | 5.540212 | 0.007391 | 0.046483 | 6.987029 | 7.260323 | 7.265543 |
| ILMN_2872537 | Nupl1     | -0.32099 | -0.37855 | -0.51784 | -0.13929 | 8.082169 | 5.539209 | 0.007397 | 0.046483 | 8.386515 | 8.065526 | 8.007965 |
| ILMN_3009910 | Rbm13     | -0.26502 | -0.41076 | -0.54624 | -0.13547 | 7.521588 | 5.539079 | 0.007398 | 0.046483 | 7.827093 | 7.562075 | 7.416329 |
| ILMN_2968032 | 2010003JO | 0.537455 | 0.497682 | 0.383076 | -0.11461 | 8.520417 | 5.538868 | 0.007399 | 0.046483 | 8.165863 | 8.703319 | 8.663546 |
| ILMN_2427063 | Uxt       | -0.46077 | -0.34054 | -0.48396 | -0.14341 | 10.60357 | 5.538788 | 0.007399 | 0.046483 | 10.92489 | 10.46412 | 10.58434 |
| ILMN_1254630 | Ptpre     | -1.16731 | -0.99271 | -0.66223 | 0.33048  | 9.990168 | 5.535425 | 0.007417 | 0.046574 | 10.69573 | 9.528416 | 9.703023 |
| ILMN_2680262 | Polr2g    | -0.59519 | -0.53736 | -0.34109 | 0.196269 | 7.960025 | 5.534793 | 0.007421 | 0.046574 | 8.328433 | 7.733242 | 7.791078 |
| ILMN_2718189 | Chn2      | 0.614226 | 0.234776 | 0.500007 | 0.265231 | 7.65672  | 5.534647 | 0.007422 | 0.046574 | 7.319468 | 7.933693 | 7.554244 |
| ILMN_2476885 | Zadh1     | -0.16615 | -0.28476 | -0.71759 | -0.43283 | 6.866177 | 5.533065 | 0.00743  | 0.046611 | 7.158301 | 6.992152 | 6.87354  |
| ILMN_2863362 | Mme       | 0.935961 | 0.78542  | 0.670571 | -0.11485 | 11.03723 | 5.531199 | 0.00744  | 0.046653 | 10.43924 | 11.3752  | 11.22466 |
| ILMN_2625991 | Akr7a5    | 0.488238 | 0.205662 | -0.10381 | -0.30947 | 9.682461 | 5.530852 | 0.007442 | 0.046653 | 9.534938 | 10.02318 | 9.740601 |
| ILMN_2642922 | BC051083  | -0.89316 | 0.268351 | 0.107688 | -0.16066 | 9.08438  | 5.530351 | 0.007445 | 0.046654 | 9.213661 | 8.320499 | 9.482012 |
| ILMN_2596016 | 0610038FO | -0.59464 | -0.34237 | -0.5562  | -0.21383 | 7.43828  | 5.523774 | 0.007481 | 0.046862 | 7.811582 | 7.216941 | 7.469213 |
| ILMN_1226293 | Slc39a4   | 0.567223 | 0.587023 | 0.550999 | -0.03602 | 11.60233 | 5.522519 | 0.007488 | 0.046885 | 11.17602 | 11.74325 | 11.76305 |
| ILMN_2773800 | Mmp17     | -0.14466 | 0.440854 | 0.499849 | 0.058995 | 5.434068 | 5.52209  | 0.00749  | 0.046885 | 5.235056 | 5.090401 | 5.67591  |
| ILMN_1244123 | Slc38a2   | 0.246178 | 0.556357 | 0.847777 | 0.29142  | 8.542068 | 5.521641 | 0.007493 | 0.046885 | 8.12949  | 8.375668 | 8.685847 |
| ILMN_2802714 | Pgam5     | 0.124508 | -0.26587 | -0.29258 | -0.02672 | 8.817489 | 5.520552 | 0.007499 | 0.046905 | 8.925975 | 9.050483 | 8.660108 |
| ILMN_2725035 | Ebpl      | -0.73247 | -0.69134 | -0.73    | -0.03865 | 5.510085 | 5.519092 | 0.007507 | 0.046928 | 6.048536 | 5.31607  | 5.357194 |
| ILMN_2819603 | Gloxd1    | 0.109536 | -0.45663 | -0.42636 | 0.030272 | 6.379332 | 5.518917 | 0.007508 | 0.046928 | 6.572697 | 6.682233 | 6.116063 |
| ILMN_2971286 | Ppp3ca    | 0.341692 | 0.283619 | 0.519402 | 0.235783 | 8.651256 | 5.516125 | 0.007523 | 0.046976 | 8.365078 | 8.70677  | 8.648696 |
| ILMN_1239627 | 4631426JO | 0.393413 | 0.7044   | 0.748378 | 0.043978 | 6.523058 | 5.516108 | 0.007523 | 0.046976 | 6.06151  | 6.454923 | 6.76591  |
| ILMN_2625047 | C430004E1 | -0.13464 | 0.225034 | 0.398009 | 0.172975 | 10.99897 | 5.516039 | 0.007524 | 0.046976 | 10.87687 | 10.74223 | 11.1019  |
| ILMN_2937261 | Mod1      | 1.039991 | 0.972564 | -0.0583  | -1.03086 | 5.643231 | 5.514675 | 0.007531 | 0.047005 | 5.154667 | 6.194658 | 6.127231 |
| ILMN_2658054 | Dhrs4     | 0.422783 | 0.394355 | -0.32618 | -0.72054 | 9.287005 | 5.514243 | 0.007534 | 0.047005 | 9.164266 | 9.587049 | 9.558621 |
| ILMN_2975900 | Rnf123    | 0.561874 | 0.417132 | 0.703448 | 0.286316 | 5.707276 | 5.510066 | 0.007557 | 0.047121 | 5.286662 | 5.848536 | 5.703794 |
| ILMN_1244460 | Efna1     | -0.51415 | 0.085247 | -0.38245 | -0.4677  | 9.680412 | 5.50965  | 0.007559 | 0.047121 | 9.88325  | 9.369104 | 9.968498 |
| ILMN_1238801 | Arl3      | -0.68025 | -0.6902  | -0.34296 | 0.347237 | 6.571605 | 5.509369 | 0.00756  | 0.047121 | 6.999959 | 6.319704 | 6.30976  |
| ILMN_2610981 | Ostb      | -0.77103 | -0.62878 | -0.68818 | -0.0594  | 11.9215  | 5.508911 | 0.007563 | 0.047121 | 12.4435  | 11.67247 | 11.81472 |
| ILMN_2762944 | 2310061N2 | -1.25926 | -0.27481 | -0.38773 | -0.11293 | 9.004024 | 5.505538 | 0.007582 | 0.047221 | 9.484474 | 8.225216 | 9.209666 |
| ILMN_2599659 | Fmnl3     | 0.487044 | 0.689153 | 0.84143  | 0.152277 | 7.032179 | 5.500764 | 0.007608 | 0.04737  | 6.527772 | 7.014816 | 7.216925 |
| ILMN_2623451 | lft172    | -0.95713 | -0.84204 | -0.77469 | 0.067349 | 8.434041 | 5.4992   | 0.007617 | 0.047408 | 9.077507 | 8.120381 | 8.235464 |
| ILMN_2677408 | Hrmt1l2   | -0.46853 | -0.52983 | -0.48599 | 0.043834 | 10.54604 | 5.497632 | 0.007626 | 0.04743  | 10.91713 | 10.4486  | 10.3873  |
| ILMN_1256971 | Nedd8     | -0.44376 | -0.2494  | -0.36134 | -0.11194 | 11.66144 | 5.497264 | 0.007628 | 0.04743  | 11.92507 | 11.48132 | 11.67567 |



|              |           |          |          |          |          |          |          |          |          |          |          |          |
|--------------|-----------|----------|----------|----------|----------|----------|----------|----------|----------|----------|----------|----------|
| ILMN_2955919 | Mcam      | -0.39617 | 0.133486 | 0.379363 | 0.245877 | 6.934244 | 5.497095 | 0.007629 | 0.04743  | 6.905074 | 6.508905 | 7.03856  |
| ILMN_2592779 | C5300500  | -0.25043 | -0.44807 | -0.75965 | -0.31158 | 6.639238 | 5.495427 | 0.007638 | 0.047471 | 7.003773 | 6.753347 | 6.555707 |
| ILMN_1246609 | Rasgrp1   | 0.348986 | 0.559423 | 0.501234 | -0.05819 | 6.846204 | 5.491682 | 0.007659 | 0.047585 | 6.493794 | 6.84278  | 7.053217 |
| ILMN_3131887 | Spag9     | -0.39081 | 0.249725 | 0.176136 | -0.07359 | 7.921436 | 5.488702 | 0.007676 | 0.047665 | 7.912673 | 7.521863 | 8.162399 |
| ILMN_2834971 | Bnpl      | -0.522   | -0.41581 | -0.31828 | 0.097532 | 5.060403 | 5.488423 | 0.007678 | 0.047665 | 5.374424 | 4.852424 | 4.958616 |
| ILMN_2710151 | 1110031BC | 0.625933 | 0.190301 | 0.335448 | 0.145148 | 5.712567 | 5.487752 | 0.007682 | 0.047672 | 5.424647 | 6.050579 | 5.614948 |
| ILMN_2892480 | 5330431N1 | -0.62214 | -0.36112 | -0.32182 | 0.039292 | 6.15537  | 5.483057 | 0.007708 | 0.04782  | 6.481639 | 5.859503 | 6.120523 |
| ILMN_1220440 | Ppil3     | -0.3359  | -0.42059 | -0.44637 | -0.02578 | 8.770114 | 5.47943  | 0.007729 | 0.047927 | 9.070829 | 8.73493  | 8.650237 |
| ILMN_2751072 | Gna11     | 0.647447 | 0.296086 | 0.470435 | 0.174348 | 11.72758 | 5.479018 | 0.007731 | 0.047927 | 11.37409 | 12.02154 | 11.67017 |
| ILMN_2691798 | Clns1a    | -0.33792 | -0.33562 | -0.48035 | -0.14474 | 9.770985 | 5.478566 | 0.007734 | 0.047927 | 10.05946 | 9.721539 | 9.72384  |
| ILMN_2677231 | Hist1h2bc | -0.63275 | -0.5629  | -0.32167 | 0.241229 | 4.720209 | 5.476148 | 0.007747 | 0.047982 | 5.09954  | 4.466793 | 4.536637 |
| ILMN_2736071 | Polr2k    | -0.97139 | -0.79498 | -0.6648  | 0.13018  | 5.163775 | 5.475978 | 0.007748 | 0.047982 | 5.771565 | 4.800179 | 4.976589 |
| ILMN_2783852 | Lphn1     | -0.4096  | 0.271571 | 0.51554  | 0.243969 | 5.354683 | 5.475539 | 0.007751 | 0.047982 | 5.260306 | 4.850705 | 5.531877 |
| ILMN_1254734 | Mrps12    | -0.55629 | -0.50096 | -0.393   | 0.107954 | 10.99297 | 5.47122  | 0.007776 | 0.048118 | 11.35553 | 10.79924 | 10.85457 |
| ILMN_2591626 | Rbm10     | 0.952956 | 0.586844 | 0.255038 | -0.33181 | 5.639296 | 5.468995 | 0.007788 | 0.048162 | 5.190587 | 6.143543 | 5.777431 |
| ILMN_1216880 | Emr1      | -0.80368 | -0.35871 | -0.35074 | 0.007966 | 5.583732 | 5.468773 | 0.00779  | 0.048162 | 5.962015 | 5.158339 | 5.603304 |
| ILMN_2735981 | Grc2f     | -0.79407 | -0.47569 | -0.50848 | -0.03279 | 8.106598 | 5.468291 | 0.007792 | 0.048162 | 8.551159 | 7.757088 | 8.075468 |
| ILMN_2601118 | Atpaf2    | -0.32231 | -0.41991 | -0.50375 | -0.08384 | 8.523948 | 5.4677   | 0.007796 | 0.048162 | 8.835441 | 8.513129 | 8.415531 |
| ILMN_1218901 | Tbc1d13   | 0.466347 | 0.248217 | 0.457955 | 0.209738 | 9.415065 | 5.467557 | 0.007797 | 0.048162 | 9.121935 | 9.588282 | 9.370152 |
| ILMN_2699488 | Lamb2     | -0.2519  | 0.324803 | 0.589996 | 0.265193 | 6.48959  | 5.465809 | 0.007807 | 0.048207 | 6.323865 | 6.071965 | 6.648669 |
| ILMN_2640203 | 2310050B2 | 0.040775 | -0.31629 | -0.54352 | -0.22723 | 7.821051 | 5.465166 | 0.00781  | 0.048213 | 8.025809 | 8.066584 | 7.709523 |
| ILMN_2643067 | 1700022N2 | 0.393558 | 0.366487 | 0.431861 | 0.065374 | 9.275946 | 5.463396 | 0.00782  | 0.048233 | 8.977969 | 9.371527 | 9.344456 |
| ILMN_1233129 | Zfp297    | 0.32719  | 0.395956 | 0.490179 | 0.094223 | 8.508514 | 5.463327 | 0.007821 | 0.048233 | 8.205183 | 8.532373 | 8.601139 |
| ILMN_2715664 | Atf1      | 0.184606 | 0.635885 | -0.03948 | -0.67537 | 4.830706 | 5.463012 | 0.007823 | 0.048233 | 4.635454 | 4.82006  | 5.271339 |
| ILMN_1215157 | 0610007P2 | -0.18539 | -0.34876 | -0.46255 | -0.11379 | 8.136785 | 5.462692 | 0.007824 | 0.048233 | 8.385961 | 8.200567 | 8.037203 |
| ILMN_2662192 | 9130427AC | 0.667118 | 0.396243 | 0.016773 | -0.37947 | 9.073739 | 5.46136  | 0.007832 | 0.048263 | 8.803706 | 9.470824 | 9.199949 |
| ILMN_2606243 | Ppp2r1a   | 0.768993 | 0.291298 | 0.347563 | 0.056265 | 9.48055  | 5.459153 | 0.007845 | 0.048324 | 9.128587 | 9.89758  | 9.419885 |
| ILMN_2641431 | Trak2     | -0.19292 | 0.178983 | 0.436305 | 0.257322 | 7.609135 | 5.455187 | 0.007868 | 0.048447 | 7.503544 | 7.310622 | 7.682527 |
| ILMN_1225635 | Senp3     | -0.7022  | -0.27326 | -0.41726 | -0.144   | 8.88897  | 5.454757 | 0.00787  | 0.048447 | 9.23715  | 8.534951 | 8.963887 |
| ILMN_2758896 | 2410019GC | -0.3014  | -0.21942 | 0.290507 | 0.509931 | 7.343688 | 5.451642 | 0.007888 | 0.048541 | 7.401268 | 7.099865 | 7.181844 |
| ILMN_3002281 | Yeats4    | -0.41455 | -0.36342 | -0.28392 | 0.0795   | 9.946075 | 5.450229 | 0.007897 | 0.048563 | 10.21155 | 9.796993 | 9.84813  |
| ILMN_2754479 | Stx8      | -0.25477 | -0.42366 | -0.48171 | -0.05804 | 9.153247 | 5.450064 | 0.007898 | 0.048563 | 9.443284 | 9.18851  | 9.019619 |
| ILMN_2726315 | Sdf4      | 0.428081 | 0.503195 | 0.595051 | 0.091856 | 7.153061 | 5.448429 | 0.007907 | 0.048574 | 6.771479 | 7.19956  | 7.274674 |
| ILMN_2855423 | Ube3b     | 0.319523 | 0.197384 | 0.566632 | 0.369248 | 7.733695 | 5.448426 | 0.007907 | 0.048574 | 7.46281  | 7.782333 | 7.660194 |
| ILMN_2778428 | Thoc6     | -0.35834 | -0.42136 | -0.57084 | -0.14948 | 7.762609 | 5.447468 | 0.007913 | 0.048574 | 8.100243 | 7.741907 | 7.678885 |

|              |           |          |          |          |          |          |          |          |          |          |          |          |
|--------------|-----------|----------|----------|----------|----------|----------|----------|----------|----------|----------|----------|----------|
| ILMN_2653617 | Cd63      | -0.43218 | -0.20423 | -0.29377 | -0.08954 | 12.95335 | 5.446799 | 0.007917 | 0.048574 | 13.1859  | 12.75372 | 12.98166 |
| ILMN_2811705 | Fbxo18    | -0.75741 | -0.60607 | -0.42833 | 0.177735 | 6.657658 | 5.446736 | 0.007917 | 0.048574 | 7.105608 | 6.348202 | 6.499543 |
| ILMN_2834728 | Prkcn     | 0.243943 | 0.34788  | 0.881608 | 0.533728 | 7.384961 | 5.446585 | 0.007918 | 0.048574 | 7.016603 | 7.260546 | 7.364483 |
| ILMN_2508745 | Zfyve21   | -0.3979  | -0.36625 | -0.31216 | 0.054093 | 12.23323 | 5.446101 | 0.007921 | 0.048574 | 12.50231 | 12.1044  | 12.13606 |
| ILMN_2715198 | Golga2    | 0.359635 | 0.643959 | 0.689882 | 0.045923 | 7.789967 | 5.445945 | 0.007922 | 0.048574 | 7.366599 | 7.726233 | 8.010557 |
| ILMN_1225520 | 2310008HC | -0.35749 | -0.29723 | -0.51915 | -0.22193 | 7.551814 | 5.443906 | 0.007934 | 0.048621 | 7.845281 | 7.487792 | 7.548056 |
| ILMN_2429025 | Wbp5      | -0.87779 | -0.5309  | -0.42447 | 0.106432 | 10.27346 | 5.443683 | 0.007935 | 0.048621 | 10.73175 | 9.853964 | 10.20085 |
| ILMN_2983714 | Apitd1    | -0.80727 | -0.60311 | -0.88774 | -0.28463 | 6.956474 | 5.442923 | 0.007939 | 0.048631 | 7.531005 | 6.723731 | 6.927892 |
| ILMN_1217670 | D330028D  | -0.65543 | -0.42248 | -0.5443  | -0.12182 | 6.206068 | 5.442237 | 0.007943 | 0.048638 | 6.611623 | 5.956189 | 6.189143 |
| ILMN_1255736 | Vcp       | 0.545199 | 0.196943 | 0.421579 | 0.224636 | 11.57757 | 5.438575 | 0.007965 | 0.04874  | 11.28664 | 11.83184 | 11.48358 |
| ILMN_2663367 | Pou2f1    | 0.636443 | 0.712734 | 0.883576 | 0.170842 | 5.832848 | 5.43845  | 0.007966 | 0.04874  | 5.27466  | 5.911103 | 5.987394 |
| ILMN_2770066 | Cyp4f18   | 0.355411 | 0.69147  | 0.546955 | -0.14451 | 8.623837 | 5.43628  | 0.007978 | 0.048801 | 8.225378 | 8.58079  | 8.916848 |
| ILMN_1229547 | Spon2     | -0.43931 | 0.269567 | 0.505522 | 0.235955 | 10.5253  | 5.432223 | 0.008002 | 0.048914 | 10.44136 | 10.00205 | 10.71093 |
| ILMN_1230545 | Mobk1b    | 0.629151 | 0.326635 | 0.363355 | 0.03672  | 8.271328 | 5.432189 | 0.008003 | 0.048914 | 7.941543 | 8.570694 | 8.268178 |
| ILMN_1224250 | B230342M  | 0.979327 | 0.773346 | 0.179281 | -0.59407 | 8.677489 | 5.43097  | 0.00801  | 0.048926 | 8.194501 | 9.173828 | 8.967847 |
| ILMN_1237990 | Gale      | -0.51967 | -0.49825 | -0.77793 | -0.27968 | 9.068598 | 5.430837 | 0.008011 | 0.048926 | 9.517559 | 8.997891 | 9.01931  |
| ILMN_2673894 | Cdv3      | 0.64155  | 0.208528 | 0.436061 | 0.227533 | 10.14295 | 5.430448 | 0.008013 | 0.048926 | 9.821417 | 10.46297 | 10.02995 |
| ILMN_2769261 | Ercc5     | 0.076374 | 0.094055 | 0.474032 | 0.379977 | 7.558559 | 5.429226 | 0.00802  | 0.048934 | 7.397444 | 7.473818 | 7.491499 |
| ILMN_1234172 | AA589584  | -0.55127 | -0.22887 | -0.28821 | -0.05933 | 10.95924 | 5.42915  | 0.008021 | 0.048934 | 11.22633 | 10.67506 | 10.99746 |
| ILMN_2913206 | BC031181  | -0.37898 | -0.3265  | -0.3927  | -0.0662  | 11.2322  | 5.428805 | 0.008023 | 0.048934 | 11.50674 | 11.12777 | 11.18024 |
| ILMN_1245717 | Epb4.9    | 0.31327  | 0.597745 | 0.612931 | 0.015186 | 5.165608 | 5.4273   | 0.008031 | 0.048971 | 4.784621 | 5.097891 | 5.382367 |
| ILMN_2497190 | Bmf       | 0.525189 | 0.643507 | 1.00839  | 0.364884 | 5.501477 | 5.425674 | 0.008041 | 0.049013 | 4.957205 | 5.482394 | 5.600712 |
| ILMN_1249547 | Zfp292    | 0.404046 | 0.353192 | 0.652664 | 0.299472 | 7.352549 | 5.422694 | 0.008059 | 0.049103 | 7.000074 | 7.40412  | 7.353265 |
| ILMN_1223353 | Hp1bp3    | 0.444574 | 0.319376 | 0.555447 | 0.23607  | 11.09903 | 5.418496 | 0.008084 | 0.049239 | 10.76918 | 11.21375 | 11.08856 |
| ILMN_2591156 | Il27ra    | 0.419768 | 0.673022 | 0.635674 | -0.03735 | 4.999535 | 5.416835 | 0.008094 | 0.049282 | 4.567419 | 4.987187 | 5.24044  |
| ILMN_2704509 | Sumo1     | -0.4649  | -0.31374 | -0.22344 | 0.090295 | 12.834   | 5.414299 | 0.008109 | 0.049355 | 13.08452 | 12.61962 | 12.77078 |
| ILMN_2690575 | Pcbd      | -0.68783 | -0.66803 | -0.78365 | -0.11562 | 8.289785 | 5.413901 | 0.008111 | 0.049355 | 8.824663 | 8.136831 | 8.156633 |
| ILMN_2846255 | Pgpep1    | 0.432864 | 0.539935 | 0.773244 | 0.233309 | 9.428057 | 5.410554 | 0.008132 | 0.04946  | 8.991546 | 9.42441  | 9.531481 |
| ILMN_1248381 | Mat2b     | -0.53356 | -0.28544 | -0.55518 | -0.26973 | 8.164303 | 5.408837 | 0.008142 | 0.049488 | 8.507848 | 7.974288 | 8.222404 |
| ILMN_2511768 | Ttc17     | 0.415751 | 0.52805  | 0.466443 | -0.06161 | 8.831282 | 5.408826 | 0.008142 | 0.049488 | 8.478722 | 8.894473 | 9.006771 |
| ILMN_2596396 | Grasp     | 0.143627 | 0.433983 | 0.739974 | 0.305991 | 6.431524 | 5.406219 | 0.008158 | 0.049555 | 6.102128 | 6.245756 | 6.536111 |
| ILMN_1237132 | AW549877  | 0.401579 | 0.387377 | 0.661816 | 0.274439 | 8.922696 | 5.405901 | 0.00816  | 0.049555 | 8.560003 | 8.961583 | 8.947381 |
| ILMN_3112837 | 3110052NC | -0.12994 | -0.37469 | -0.41542 | -0.04073 | 6.668995 | 5.40558  | 0.008161 | 0.049555 | 6.899008 | 6.769072 | 6.524314 |
| ILMN_2765759 | Asb2      | 0.10383  | 0.452257 | 0.750229 | 0.297972 | 9.473082 | 5.40454  | 0.008168 | 0.049576 | 9.146503 | 9.250334 | 9.59876  |
| ILMN_1252294 | Eef2      | 1.059394 | 0.50268  | 0.673027 | 0.170347 | 9.884402 | 5.404064 | 0.008171 | 0.049576 | 9.325627 | 10.38502 | 9.828307 |

|              |         |          |          |          |          |          |          |          |          |          |          |          |
|--------------|---------|----------|----------|----------|----------|----------|----------|----------|----------|----------|----------|----------|
| ILMN_2744478 | Lrrc1   | 0.46633  | 0.514131 | 0.463785 | -0.05035 | 8.930172 | 5.403086 | 0.008177 | 0.049595 | 8.569111 | 9.03544  | 9.083242 |
| ILMN_2769064 | Sdhb    | -0.3946  | -0.42608 | -0.58087 | -0.15479 | 11.15003 | 5.401967 | 0.008183 | 0.049619 | 11.50041 | 11.10582 | 11.07433 |
| ILMN_2820948 | Dbt     | -0.05938 | -0.55179 | -0.00246 | 0.549332 | 6.450127 | 5.399992 | 0.008195 | 0.049674 | 6.603535 | 6.544155 | 6.051742 |
| ILMN_2627179 | Ell3    | -0.23989 | -0.78024 | -0.5177  | 0.262534 | 6.581776 | 5.398563 | 0.008204 | 0.049709 | 6.966233 | 6.726343 | 6.185997 |
| ILMN_2686924 | Epha1   | 0.433498 | -0.0704  | -0.41541 | -0.345   | 6.102736 | 5.397419 | 0.008211 | 0.049734 | 6.115814 | 6.549313 | 6.04541  |
| ILMN_2780489 | Fh1     | -0.17856 | -0.59691 | -0.67134 | -0.07443 | 10.40459 | 5.396816 | 0.008215 | 0.049739 | 10.76629 | 10.58774 | 10.16938 |
| ILMN_2721894 | Eif2b4  | 0.185005 | -0.24705 | -0.2126  | 0.034449 | 9.758946 | 5.396013 | 0.00822  | 0.049751 | 9.827606 | 10.01261 | 9.580559 |
| ILMN_2888742 | Ntan1   | -0.37829 | -0.38993 | -0.33407 | 0.05586  | 10.15084 | 5.3919   | 0.008245 | 0.049886 | 10.42642 | 10.04812 | 10.03648 |
| ILMN_2643377 | Slc24a6 | 0.158004 | 0.443276 | 0.453304 | 0.010028 | 7.003298 | 5.388956 | 0.008263 | 0.049978 | 6.739652 | 6.897656 | 7.182927 |

| WD_Tg_To | WD - Chow | WD_Empty_Vector - Chow | WD_Tg_Tomatoes - Chow | WD_Tg_Tomatoes - WD_Empty_Vector |
|----------|-----------|------------------------|-----------------------|----------------------------------|
| 6.442145 | 1         | 1                      | 1                     | 1                                |
| 10.00119 | 1         | 1                      | 1                     | 0                                |
| 7.245161 | 1         | 1                      | 1                     | 0                                |
| 6.138205 | 1         | 1                      | 1                     | 0                                |
| 12.48379 | 1         | 1                      | 1                     | 0                                |
| 7.816463 | 1         | 1                      | 1                     | 0                                |
| 11.4117  | 1         | 1                      | 1                     | -1                               |
| 8.521308 | 1         | 1                      | 1                     | 0                                |
| 8.046207 | -1        | -1                     | -1                    | 0                                |
| 11.94558 | 1         | 1                      | 1                     | 0                                |
| 10.78552 | 1         | 1                      | 1                     | 0                                |
| 7.528032 | -1        | -1                     | -1                    | 0                                |
| 9.683925 | 1         | 1                      | 1                     | 0                                |
| 8.683752 | 1         | 1                      | 1                     | 0                                |
| 7.352513 | 1         | 1                      | 1                     | 1                                |
| 10.68759 | 1         | 1                      | 1                     | 0                                |
| 11.31226 | 1         | 1                      | 1                     | -1                               |
| 8.494579 | 1         | 1                      | 1                     | 0                                |
| 10.42738 | 1         | 1                      | 1                     | 0                                |
| 11.3217  | 1         | 1                      | 1                     | 0                                |
| 7.996482 | -1        | -1                     | -1                    | -1                               |
| 11.11278 | 1         | 1                      | 1                     | 0                                |
| 7.919865 | 1         | 1                      | 1                     | 0                                |
| 8.59881  | 1         | 1                      | 1                     | 0                                |
| 10.55565 | 1         | 1                      | 1                     | 0                                |
| 10.22195 | -1        | -1                     | -1                    | 0                                |
| 11.03396 | 1         | 1                      | 1                     | 0                                |
| 10.23281 | 1         | 1                      | 1                     | 0                                |
| 10.90155 | 1         | 1                      | 1                     | 0                                |
| 7.130221 | 1         | 1                      | 1                     | 1                                |
| 8.789226 | -1        | -1                     | -1                    | -1                               |
| 9.379312 | 1         | 1                      | 1                     | 0                                |
| 10.78033 | 1         | 1                      | 1                     | 0                                |
| 9.523339 | 1         | 1                      | 1                     | 1                                |

|          |    |    |    |    |
|----------|----|----|----|----|
| 12.38321 | 1  | 1  | 1  | 0  |
| 6.688859 | 1  | 1  | 1  | 0  |
| 7.55844  | -1 | -1 | -1 | 0  |
| 10.97518 | 1  | 1  | 1  | 0  |
| 9.46431  | -1 | -1 | -1 | -1 |
| 10.13572 | 1  | 1  | 1  | 0  |
| 11.61133 | 1  | 1  | 1  | 0  |
| 10.67283 | 1  | 1  | 1  | 0  |
| 11.32572 | 1  | 1  | 1  | 0  |
| 6.84633  | -1 | -1 | -1 | 0  |
| 12.60045 | 1  | 1  | 1  | 0  |
| 5.618361 | 1  | 1  | 1  | 0  |
| 8.637959 | 1  | 1  | 1  | 0  |
| 9.163225 | 1  | 1  | 1  | 0  |
| 8.68231  | 1  | 1  | 1  | 0  |
| 9.058772 | -1 | -1 | -1 | 0  |
| 9.947793 | -1 | -1 | -1 | 0  |
| 6.720957 | -1 | -1 | -1 | 0  |
| 8.829228 | 1  | 1  | 1  | 0  |
| 9.090986 | 1  | 1  | 1  | 0  |
| 8.44102  | 1  | 1  | 1  | 0  |
| 7.930579 | 1  | 1  | 1  | 0  |
| 8.761444 | 1  | 1  | 1  | 0  |
| 8.381697 | 1  | 1  | 1  | 0  |
| 9.637666 | 1  | 1  | 1  | 0  |
| 9.68991  | -1 | -1 | -1 | 0  |
| 6.425053 | -1 | -1 | -1 | 0  |
| 6.078361 | -1 | -1 | -1 | 0  |
| 9.299288 | -1 | -1 | -1 | -1 |
| 10.06289 | -1 | -1 | -1 | 0  |
| 7.282748 | 1  | 1  | 1  | 0  |
| 11.63503 | 1  | 1  | 1  | 0  |
| 9.006911 | 1  | 1  | 1  | 0  |
| 9.840893 | 1  | 1  | 1  | 0  |
| 9.203227 | 1  | 1  | 1  | 0  |

|          |    |    |    |    |
|----------|----|----|----|----|
| 7.672534 | 1  | 1  | 1  | 0  |
| 8.027958 | -1 | -1 | -1 | 0  |
| 11.51771 | -1 | -1 | -1 | 0  |
| 11.41614 | -1 | 0  | -1 | 0  |
| 10.09558 | -1 | -1 | -1 | 0  |
| 7.999936 | -1 | -1 | -1 | 0  |
| 7.531734 | 1  | 1  | 1  | 0  |
| 11.64373 | 1  | 1  | 1  | 0  |
| 9.299836 | 1  | 1  | 1  | 0  |
| 9.299971 | 1  | 1  | 1  | 0  |
| 9.280775 | -1 | -1 | -1 | 0  |
| 11.60152 | -1 | -1 | -1 | 0  |
| 7.373036 | -1 | -1 | -1 | 0  |
| 8.82859  | -1 | -1 | -1 | -1 |
| 8.371776 | -1 | -1 | -1 | 0  |
| 11.14692 | 1  | 1  | 1  | 0  |
| 10.25176 | -1 | -1 | -1 | 0  |
| 6.895079 | -1 | -1 | -1 | 1  |
| 10.86958 | 1  | 1  | 1  | 0  |
| 6.457543 | 1  | 1  | 1  | 0  |
| 10.6071  | 1  | 1  | 1  | 0  |
| 9.858251 | 1  | 1  | 1  | 0  |
| 10.33687 | -1 | -1 | -1 | 0  |
| 8.727396 | 1  | 1  | 1  | 0  |
| 8.203363 | -1 | -1 | -1 | 0  |
| 7.976196 | -1 | -1 | -1 | 0  |
| 7.936038 | 1  | 1  | 1  | 1  |
| 9.915017 | 1  | 1  | 1  | 0  |
| 7.763964 | -1 | -1 | -1 | 1  |
| 11.39478 | 1  | 1  | 1  | 0  |
| 7.631454 | -1 | -1 | -1 | -1 |
| 10.65537 | 1  | 1  | 1  | 0  |
| 6.776429 | 1  | 1  | 1  | 0  |
| 8.178107 | -1 | -1 | -1 | 0  |
| 9.072121 | 1  | 1  | 1  | 0  |

|          |    |    |    |    |
|----------|----|----|----|----|
| 10.50861 | 1  | 1  | 1  | 0  |
| 10.12387 | -1 | -1 | -1 | 0  |
| 7.829436 | 1  | 1  | 1  | 0  |
| 9.217353 | -1 | -1 | -1 | 0  |
| 11.37942 | 1  | 1  | 1  | 0  |
| 9.80618  | 1  | 1  | 1  | 0  |
| 8.41372  | -1 | -1 | -1 | 0  |
| 8.945981 | 1  | 1  | 1  | 0  |
| 7.833576 | -1 | -1 | -1 | 0  |
| 8.827046 | 1  | 1  | 1  | 0  |
| 9.546765 | 1  | 1  | 1  | 1  |
| 9.34798  | 1  | 1  | 1  | 0  |
| 9.2417   | 1  | 1  | 1  | 0  |
| 7.652361 | -1 | -1 | -1 | 0  |
| 6.355081 | 1  | 1  | 0  | -1 |
| 7.779331 | 1  | 1  | 1  | 0  |
| 7.240377 | -1 | -1 | -1 | 0  |
| 9.901687 | -1 | -1 | -1 | 0  |
| 13.16676 | 1  | 1  | 1  | 0  |
| 7.855703 | -1 | -1 | -1 | 0  |
| 9.093722 | 1  | 1  | 1  | 0  |
| 5.960962 | -1 | -1 | -1 | 0  |
| 6.692504 | -1 | -1 | -1 | 0  |
| 8.784992 | -1 | -1 | 0  | 1  |
| 6.753548 | 0  | -1 | -1 | 0  |
| 10.37636 | 1  | 1  | 1  | 0  |
| 7.082141 | 1  | 0  | 1  | 1  |
| 9.257871 | -1 | -1 | -1 | 0  |
| 9.688723 | 1  | 1  | 1  | 0  |
| 7.942601 | 1  | 1  | 1  | 0  |
| 11.71861 | 1  | 1  | 1  | 0  |
| 13.3765  | 1  | 1  | 1  | 0  |
| 12.65832 | 1  | 1  | 0  | -1 |
| 11.5746  | -1 | -1 | -1 | 0  |
| 10.26168 | 1  | 1  | 1  | 0  |

|          |    |    |    |    |
|----------|----|----|----|----|
| 9.718611 | 1  | 0  | 1  | 1  |
| 6.244813 | -1 | -1 | -1 | 0  |
| 9.313468 | 1  | 1  | 1  | 0  |
| 7.549403 | 1  | 1  | 1  | 1  |
| 7.299227 | 1  | 1  | 1  | 0  |
| 13.07964 | 1  | 1  | 1  | 0  |
| 9.556449 | 1  | 1  | 1  | 0  |
| 11.25985 | 1  | 1  | 1  | 0  |
| 8.898805 | 1  | 1  | 1  | 0  |
| 7.22652  | -1 | 0  | 0  | 0  |
| 9.953544 | 1  | 1  | 1  | 0  |
| 7.467593 | 0  | 1  | 1  | 0  |
| 6.511183 | -1 | -1 | -1 | 0  |
| 9.014486 | -1 | -1 | -1 | 0  |
| 6.88869  | 1  | 1  | 1  | 0  |
| 8.089161 | 1  | 1  | 1  | 0  |
| 9.798733 | -1 | -1 | -1 | 0  |
| 10.64366 | 1  | 1  | 1  | 0  |
| 7.089982 | 1  | 1  | 1  | 0  |
| 7.3197   | 1  | 1  | 1  | 0  |
| 10.00881 | 1  | 1  | 1  | 0  |
| 10.46326 | 1  | 1  | 1  | 0  |
| 7.062897 | 1  | 1  | 1  | -1 |
| 8.971026 | 1  | 1  | 1  | 0  |
| 8.934569 | 1  | 1  | 1  | 0  |
| 5.171971 | -1 | -1 | -1 | 0  |
| 7.364224 | 1  | 1  | 1  | 0  |
| 7.119238 | -1 | -1 | -1 | 0  |
| 9.863206 | 1  | 1  | 1  | 0  |
| 8.024204 | -1 | -1 | -1 | 0  |
| 9.868204 | 1  | 1  | 1  | 1  |
| 7.647726 | -1 | -1 | 0  | 0  |
| 9.938455 | 1  | 1  | 1  | 0  |
| 9.455498 | 1  | 1  | 1  | 0  |
| 8.451327 | -1 | -1 | -1 | 0  |



|          |    |    |    |    |
|----------|----|----|----|----|
| 10.28071 | 1  | 1  | 1  | 0  |
| 8.979854 | -1 | -1 | -1 | 0  |
| 12.60957 | 1  | 1  | 1  | 0  |
| 7.968421 | -1 | -1 | -1 | 0  |
| 7.973448 | 1  | 1  | 1  | 0  |
| 9.603233 | 1  | 1  | 1  | 0  |
| 11.26987 | 1  | 1  | 1  | 0  |
| 10.48007 | 1  | 1  | 1  | 0  |
| 5.851541 | 1  | 1  | 1  | 0  |
| 11.43838 | -1 | -1 | -1 | 0  |
| 8.490841 | -1 | -1 | -1 | 0  |
| 5.822977 | -1 | -1 | -1 | 0  |
| 10.58665 | 1  | 1  | 1  | 0  |
| 11.61746 | 1  | 1  | 1  | 0  |
| 9.505421 | -1 | -1 | -1 | 0  |
| 7.601702 | 1  | 1  | 1  | 0  |
| 9.568239 | 1  | 1  | 1  | 0  |
| 7.939351 | 1  | 1  | 1  | 0  |
| 6.498702 | 0  | -1 | -1 | -1 |
| 8.380024 | -1 | -1 | -1 | 0  |
| 8.809403 | -1 | -1 | -1 | 0  |
| 7.531841 | 1  | 1  | 1  | 0  |
| 5.337062 | -1 | -1 | -1 | 0  |
| 10.25974 | -1 | -1 | -1 | 0  |
| 13.08803 | 1  | 1  | 1  | 0  |
| 10.99004 | -1 | -1 | -1 | 0  |
| 8.037467 | 0  | -1 | -1 | 0  |
| 7.470114 | 1  | 1  | 1  | 0  |
| 9.573602 | -1 | -1 | -1 | 0  |
| 8.061657 | 1  | 0  | 0  | 0  |
| 9.877769 | 1  | 1  | 1  | 0  |
| 7.410569 | -1 | -1 | -1 | 0  |
| 9.964138 | 1  | 1  | 1  | 0  |
| 10.01319 | -1 | -1 | -1 | 0  |
| 6.422689 | 1  | 1  | 1  | 1  |

|          |    |    |    |   |
|----------|----|----|----|---|
| 7.750125 | -1 | -1 | -1 | 0 |
| 5.948661 | -1 | -1 | -1 | 0 |
| 9.530397 | -1 | -1 | -1 | 0 |
| 9.320151 | 1  | 1  | 1  | 0 |
| 6.792031 | -1 | -1 | -1 | 0 |
| 8.545121 | 1  | 1  | 1  | 0 |
| 6.59289  | 1  | 1  | 1  | 0 |
| 9.325537 | 1  | 1  | 1  | 0 |
| 9.380469 | 1  | 1  | 1  | 0 |
| 11.348   | -1 | -1 | -1 | 0 |
| 7.85691  | -1 | -1 | -1 | 0 |
| 9.762576 | 1  | 1  | 1  | 0 |
| 11.28972 | -1 | 0  | 0  | 0 |
| 9.382795 | 1  | 1  | 1  | 0 |
| 9.40609  | 1  | 1  | 1  | 0 |
| 6.518499 | 1  | 1  | 1  | 0 |
| 8.207062 | -1 | -1 | -1 | 0 |
| 7.796914 | -1 | -1 | -1 | 0 |
| 8.955991 | 1  | 1  | 1  | 0 |
| 8.920301 | -1 | -1 | -1 | 0 |
| 8.743356 | -1 | -1 | -1 | 0 |
| 9.026428 | -1 | -1 | -1 | 0 |
| 13.01604 | 1  | 1  | 1  | 0 |
| 9.1392   | -1 | -1 | -1 | 0 |
| 10.91627 | -1 | -1 | -1 | 0 |
| 11.40973 | 1  | 1  | 1  | 0 |
| 9.672959 | -1 | -1 | -1 | 0 |
| 6.00089  | 1  | 0  | 0  | 0 |
| 9.91584  | -1 | -1 | -1 | 0 |
| 8.978502 | 1  | 1  | 1  | 0 |
| 11.46832 | 1  | 1  | 1  | 0 |
| 7.30669  | 1  | 1  | 1  | 0 |
| 4.917045 | -1 | -1 | -1 | 0 |
| 9.509061 | 0  | -1 | -1 | 0 |
| 8.555709 | 1  | 1  | 1  | 0 |

|          |    |    |    |    |
|----------|----|----|----|----|
| 7.36891  | -1 | -1 | -1 | 0  |
| 8.256223 | 0  | -1 | -1 | 0  |
| 10.13157 | -1 | -1 | -1 | 0  |
| 8.493463 | 0  | -1 | -1 | 0  |
| 9.725943 | 1  | 1  | 0  | -1 |
| 9.545948 | -1 | -1 | -1 | 0  |
| 6.938194 | 1  | 1  | 1  | 0  |
| 7.271185 | 1  | 1  | 1  | 0  |
| 11.33244 | 1  | 1  | 0  | -1 |
| 6.966121 | 1  | 1  | 1  | 0  |
| 8.947641 | -1 | -1 | -1 | 0  |
| 6.465942 | 1  | 1  | 1  | 0  |
| 7.588573 | 1  | 1  | 1  | 0  |
| 10.12277 | 1  | 1  | 1  | 0  |
| 6.554425 | 1  | 1  | 1  | 0  |
| 9.08507  | 1  | 1  | 1  | 0  |
| 9.11466  | 1  | 1  | 1  | 0  |
| 12.55642 | 1  | 1  | 1  | 0  |
| 9.129109 | 1  | 1  | 1  | 0  |
| 8.011749 | -1 | -1 | -1 | 0  |
| 7.424905 | -1 | -1 | -1 | 0  |
| 9.070208 | 1  | 1  | 1  | 0  |
| 7.516929 | 1  | 0  | 1  | 1  |
| 8.1934   | 1  | 0  | 1  | 1  |
| 9.45252  | -1 | -1 | -1 | 0  |
| 6.621479 | -1 | -1 | -1 | 0  |
| 8.413551 | -1 | -1 | -1 | 0  |
| 7.56134  | 1  | -1 | -1 | 0  |
| 8.091257 | -1 | -1 | -1 | 0  |
| 9.451652 | 1  | 1  | 1  | 0  |
| 11.97271 | -1 | -1 | -1 | 0  |
| 11.39643 | 1  | 1  | 1  | 0  |
| 8.674383 | 1  | 1  | 1  | 0  |
| 9.081579 | -1 | -1 | -1 | 0  |
| 7.548076 | -1 | 0  | 0  | 0  |

|          |    |    |    |   |
|----------|----|----|----|---|
| 10.29951 | -1 | -1 | -1 | 0 |
| 9.650813 | -1 | -1 | -1 | 0 |
| 10.57174 | 1  | 1  | 1  | 0 |
| 11.97396 | -1 | -1 | -1 | 0 |
| 7.44701  | -1 | -1 | -1 | 0 |
| 12.28856 | -1 | 0  | 0  | 0 |
| 12.63337 | 1  | 1  | 1  | 0 |
| 12.06892 | 1  | 1  | 1  | 0 |
| 9.252259 | -1 | -1 | -1 | 0 |
| 10.70938 | -1 | -1 | -1 | 0 |
| 9.70417  | 1  | 1  | 1  | 0 |
| 9.214457 | 1  | 1  | 1  | 0 |
| 12.05481 | 1  | 1  | 1  | 0 |
| 7.022281 | -1 | -1 | -1 | 0 |
| 5.486389 | -1 | -1 | -1 | 0 |
| 12.69962 | 1  | 1  | 1  | 1 |
| 7.023844 | 1  | 0  | 1  | 0 |
| 12.35711 | 1  | 1  | 1  | 0 |
| 10.23716 | 1  | 1  | 1  | 0 |
| 8.514847 | -1 | -1 | -1 | 0 |
| 6.49004  | 1  | 1  | 1  | 0 |
| 8.10264  | -1 | -1 | -1 | 0 |
| 9.315259 | 1  | 1  | 1  | 0 |
| 11.20224 | 1  | 1  | 1  | 0 |
| 10.66128 | 1  | 1  | 1  | 0 |
| 7.378985 | 1  | 1  | 1  | 0 |
| 10.67701 | -1 | -1 | -1 | 0 |
| 7.608595 | -1 | -1 | -1 | 0 |
| 8.466569 | -1 | -1 | -1 | 0 |
| 10.11287 | -1 | -1 | -1 | 0 |
| 9.516614 | -1 | -1 | -1 | 0 |
| 7.669739 | -1 | -1 | -1 | 0 |
| 7.391132 | 1  | 1  | 1  | 0 |
| 9.151899 | 1  | 1  | 1  | 0 |
| 7.239001 | -1 | -1 | -1 | 0 |

|          |    |    |    |   |
|----------|----|----|----|---|
| 10.04236 | 1  | 0  | 0  | 0 |
| 7.164717 | -1 | -1 | -1 | 0 |
| 11.12598 | 1  | 1  | 1  | 0 |
| 8.133755 | -1 | -1 | -1 | 0 |
| 11.56377 | -1 | -1 | -1 | 0 |
| 8.702663 | -1 | -1 | -1 | 0 |
| 9.724916 | 1  | 1  | 1  | 0 |
| 12.39474 | 1  | 1  | 1  | 0 |
| 9.7854   | -1 | -1 | -1 | 0 |
| 8.268575 | -1 | -1 | -1 | 0 |
| 10.73637 | 1  | 1  | 1  | 0 |
| 7.349138 | 1  | 1  | 1  | 0 |
| 7.465192 | -1 | -1 | -1 | 0 |
| 11.46994 | -1 | 0  | 0  | 0 |
| 10.05678 | -1 | -1 | -1 | 0 |
| 11.29379 | -1 | -1 | -1 | 0 |
| 7.342447 | -1 | -1 | -1 | 0 |
| 6.887051 | 1  | 1  | 1  | 0 |
| 6.888128 | 1  | 1  | 1  | 0 |
| 6.560574 | -1 | -1 | -1 | 0 |
| 7.059592 | 1  | 1  | 1  | 0 |
| 8.707231 | -1 | -1 | -1 | 0 |
| 7.9975   | 1  | 1  | 1  | 0 |
| 7.881076 | -1 | -1 | -1 | 0 |
| 10.02366 | -1 | -1 | -1 | 0 |
| 8.613545 | -1 | 0  | -1 | 0 |
| 11.31764 | 1  | 1  | 1  | 0 |
| 10.30945 | -1 | 0  | 0  | 0 |
| 5.440769 | -1 | -1 | 0  | 0 |
| 12.23637 | 1  | 1  | 1  | 0 |
| 10.00457 | 0  | 1  | 1  | 0 |
| 8.52013  | 1  | 1  | 1  | 0 |
| 11.01833 | 1  | 1  | 1  | 0 |
| 6.199691 | 1  | 1  | 1  | 0 |
| 8.840003 | 1  | 0  | 1  | 0 |

|          |    |    |    |    |
|----------|----|----|----|----|
| 8.356199 | -1 | -1 | -1 | 0  |
| 5.056161 | 0  | -1 | -1 | 0  |
| 6.928753 | -1 | 0  | 0  | 0  |
| 9.897702 | 1  | 1  | 1  | 0  |
| 8.079152 | -1 | -1 | -1 | 0  |
| 9.291367 | 1  | 1  | 1  | 0  |
| 10.42363 | -1 | -1 | -1 | 0  |
| 8.757192 | 1  | 1  | 1  | 0  |
| 6.176713 | 0  | -1 | -1 | 0  |
| 7.782185 | 1  | 1  | 1  | 0  |
| 12.57832 | 1  | 1  | 1  | 0  |
| 8.947406 | -1 | -1 | -1 | 0  |
| 11.64608 | 1  | 1  | 1  | 0  |
| 6.851832 | 1  | 1  | 1  | 0  |
| 6.978525 | 1  | 1  | 1  | 0  |
| 6.249591 | 0  | -1 | -1 | 0  |
| 6.300291 | 1  | 1  | 0  | 0  |
| 8.943272 | 1  | 1  | 1  | 0  |
| 7.849207 | -1 | -1 | -1 | 0  |
| 11.91453 | 1  | 1  | 1  | 0  |
| 7.128261 | -1 | -1 | -1 | 0  |
| 9.239621 | -1 | -1 | -1 | 0  |
| 11.12335 | 1  | 1  | 1  | 0  |
| 10.98399 | 1  | 1  | 1  | 0  |
| 11.37838 | 1  | 1  | 1  | -1 |
| 4.622655 | 1  | 0  | 0  | 0  |
| 9.464279 | 1  | 1  | 1  | 0  |
| 6.122622 | 1  | 1  | 1  | 0  |
| 6.998369 | 1  | 1  | 1  | 0  |
| 5.907351 | -1 | -1 | -1 | 0  |
| 9.503983 | -1 | -1 | -1 | 0  |
| 7.581377 | 1  | 1  | 1  | 0  |
| 8.186891 | 1  | 1  | 1  | 0  |
| 11.65691 | 1  | 1  | 1  | 0  |
| 9.07231  | 1  | 1  | 1  | 0  |

|          |    |    |    |    |
|----------|----|----|----|----|
| 7.297411 | -1 | -1 | -1 | 0  |
| 6.409123 | 1  | 1  | 1  | 0  |
| 7.962584 | 0  | -1 | -1 | 0  |
| 10.43646 | -1 | 0  | 0  | 0  |
| 6.629813 | 1  | 0  | 1  | 0  |
| 7.760784 | 1  | 1  | 1  | 0  |
| 8.324323 | -1 | -1 | -1 | 0  |
| 10.8005  | 1  | 1  | 1  | 0  |
| 6.720381 | -1 | -1 | -1 | 0  |
| 10.01077 | -1 | -1 | -1 | 0  |
| 5.743204 | 1  | 1  | 1  | 0  |
| 8.245097 | -1 | 0  | -1 | 0  |
| 7.572751 | 0  | 1  | 1  | 0  |
| 9.177411 | -1 | -1 | -1 | 0  |
| 8.803615 | -1 | -1 | -1 | 0  |
| 9.590231 | 1  | 1  | 1  | 0  |
| 9.087802 | -1 | 0  | -1 | 0  |
| 6.976649 | -1 | 0  | -1 | -1 |
| 7.785604 | 1  | 1  | 1  | 0  |
| 9.157161 | 1  | 1  | 1  | 0  |
| 9.319282 | -1 | -1 | -1 | 0  |
| 8.80996  | -1 | -1 | -1 | 0  |
| 6.953888 | 1  | 1  | 1  | 0  |
| 11.65348 | -1 | -1 | -1 | 0  |
| 6.66074  | -1 | -1 | -1 | 0  |
| 8.036466 | -1 | -1 | -1 | 0  |
| 11.49534 | 1  | 1  | 1  | 0  |
| 7.796189 | -1 | -1 | -1 | 0  |
| 6.863939 | 1  | 1  | 1  | 0  |
| 11.01563 | 1  | 1  | 1  | 0  |
| 9.926697 | -1 | -1 | -1 | 0  |
| 6.868671 | -1 | -1 | -1 | 0  |
| 8.138916 | 1  | 1  | 1  | 0  |
| 9.968689 | -1 | -1 | -1 | 0  |
| 8.972135 | 1  | 1  | 1  | 0  |

|          |    |    |    |    |
|----------|----|----|----|----|
| 9.666406 | -1 | -1 | -1 | 0  |
| 8.522877 | 1  | 1  | 0  | -1 |
| 4.729432 | -1 | 0  | -1 | 0  |
| 10.74739 | 1  | 1  | 1  | 0  |
| 11.0631  | 1  | 1  | 1  | 0  |
| 9.870638 | 1  | 1  | 1  | 0  |
| 7.739289 | -1 | -1 | -1 | -1 |
| 11.67291 | 0  | -1 | -1 | -1 |
| 8.778589 | -1 | -1 | -1 | 0  |
| 7.289296 | 1  | 1  | 1  | 1  |
| 8.014538 | 1  | 1  | 1  | 0  |
| 7.559987 | 1  | 0  | -1 | -1 |
| 7.710515 | 1  | 1  | 1  | 0  |
| 7.247139 | 0  | -1 | -1 | -1 |
| 10.40968 | 1  | 1  | 1  | 0  |
| 6.360664 | -1 | 0  | 0  | 0  |
| 5.604387 | -1 | -1 | -1 | 0  |
| 11.02073 | 0  | 1  | 1  | 0  |
| 10.30441 | -1 | -1 | -1 | 0  |
| 10.73    | 1  | 1  | 1  | 0  |
| 6.096704 | -1 | -1 | -1 | 0  |
| 5.498505 | 1  | 1  | 1  | 0  |
| 12.27349 | 1  | 1  | 1  | 0  |
| 8.688619 | 1  | 1  | 1  | 0  |
| 9.00269  | 1  | 1  | 1  | 0  |
| 8.945741 | -1 | 0  | -1 | 0  |
| 12.01149 | 1  | 1  | 1  | 0  |
| 9.306219 | 1  | 0  | 1  | 0  |
| 4.530197 | 1  | 0  | 0  | 0  |
| 8.133934 | -1 | -1 | -1 | 0  |
| 7.489661 | -1 | -1 | -1 | 0  |
| 8.10225  | 1  | 1  | 1  | 0  |
| 7.922592 | -1 | -1 | -1 | 0  |
| 8.992791 | 1  | 1  | 1  | 0  |
| 9.031313 | 1  | 1  | 1  | 0  |



|          |    |    |    |    |
|----------|----|----|----|----|
| 12.82528 | 1  | 1  | 1  | 0  |
| 7.01715  | 1  | 1  | 1  | 0  |
| 9.169075 | 1  | 1  | 1  | 0  |
| 7.103333 | 1  | 1  | 1  | 0  |
| 11.67256 | -1 | -1 | -1 | 0  |
| 6.569503 | -1 | -1 | -1 | -1 |
| 8.613536 | 1  | 1  | 1  | 0  |
| 10.70465 | 0  | -1 | -1 | 0  |
| 10.82472 | -1 | -1 | -1 | 0  |
| 8.297109 | 0  | 1  | 1  | 0  |
| 9.260485 | 0  | -1 | -1 | 0  |
| 10.22128 | 1  | 1  | 1  | 0  |
| 9.737866 | 1  | 1  | 1  | 0  |
| 5.911491 | 0  | -1 | -1 | 0  |
| 10.4383  | -1 | -1 | -1 | 0  |
| 7.239683 | -1 | -1 | -1 | 0  |
| 8.00674  | 1  | 1  | 1  | 0  |
| 7.720868 | -1 | -1 | -1 | 0  |
| 8.11202  | 1  | 1  | 1  | 0  |
| 12.16894 | 1  | 1  | 1  | 0  |
| 10.59374 | -1 | 0  | -1 | 0  |
| 7.663389 | -1 | -1 | -1 | 0  |
| 10.38006 | -1 | -1 | -1 | 0  |
| 7.944749 | 1  | 1  | 1  | 0  |
| 12.46523 | -1 | 0  | 0  | 0  |
| 11.43704 | 1  | 1  | 1  | 0  |
| 5.613136 | 1  | -1 | -1 | -1 |
| 5.964095 | -1 | -1 | -1 | 0  |
| 6.937426 | 0  | -1 | -1 | -1 |
| 11.23851 | 1  | 0  | 0  | 0  |
| 10.36588 | 1  | 1  | 1  | 0  |
| 7.98901  | 1  | 1  | 1  | 0  |
| 6.869785 | -1 | -1 | -1 | 0  |
| 8.333383 | 1  | 1  | 1  | 0  |
| 8.679838 | 0  | -1 | -1 | 0  |

|          |    |    |    |    |
|----------|----|----|----|----|
| 6.977186 | -1 | -1 | -1 | 0  |
| 10.79405 | -1 | 0  | 0  | 0  |
| 10.63646 | -1 | -1 | -1 | 0  |
| 6.718412 | -1 | -1 | -1 | 0  |
| 6.940408 | -1 | -1 | -1 | 0  |
| 9.386157 | 1  | 1  | 1  | 0  |
| 8.915253 | 1  | 1  | 1  | 0  |
| 7.600802 | 1  | 1  | 1  | 0  |
| 8.403395 | 1  | 1  | 1  | 0  |
| 11.36806 | 1  | 1  | 1  | 0  |
| 12.96737 | 1  | 1  | 1  | 0  |
| 6.04157  | 1  | 1  | 1  | 0  |
| 7.935633 | -1 | -1 | -1 | 0  |
| 6.643395 | 1  | 1  | 1  | 0  |
| 9.085944 | -1 | -1 | -1 | 0  |
| 10.6182  | -1 | -1 | -1 | 0  |
| 9.169204 | -1 | 0  | -1 | 0  |
| 7.948278 | 1  | 1  | 1  | 0  |
| 5.73666  | -1 | -1 | -1 | 0  |
| 10.62288 | 1  | 1  | 1  | 0  |
| 10.00033 | -1 | -1 | -1 | 0  |
| 7.217881 | -1 | 0  | 0  | 0  |
| 6.417736 | 0  | -1 | -1 | 0  |
| 7.496454 | 1  | 1  | 1  | 0  |
| 10.62539 | -1 | -1 | -1 | 0  |
| 10.96335 | 1  | 1  | 1  | 0  |
| 10.66427 | 1  | 1  | 1  | 0  |
| 8.344809 | -1 | -1 | -1 | 0  |
| 9.90234  | -1 | 0  | -1 | 0  |
| 9.783654 | 1  | 1  | 1  | 0  |
| 4.57139  | -1 | -1 | -1 | 0  |
| 8.326891 | -1 | -1 | -1 | 0  |
| 10.33857 | 1  | 1  | 0  | -1 |
| 9.631463 | 0  | -1 | -1 | 0  |
| 6.3649   | 1  | 1  | 1  | 0  |

|          |    |    |    |   |
|----------|----|----|----|---|
| 9.033385 | -1 | -1 | -1 | 0 |
| 8.638306 | -1 | -1 | -1 | 0 |
| 9.385412 | -1 | -1 | -1 | 0 |
| 7.069312 | -1 | 0  | 0  | 0 |
| 7.527026 | 1  | 1  | 1  | 0 |
| 7.949803 | -1 | -1 | -1 | 0 |
| 10.79137 | 1  | 1  | 0  | 0 |
| 7.255448 | 1  | 1  | 0  | 0 |
| 9.219279 | 1  | 1  | 1  | 0 |
| 6.734729 | 1  | 1  | 1  | 0 |
| 9.219288 | -1 | -1 | -1 | 0 |
| 12.54809 | -1 | 0  | 0  | 0 |
| 8.878724 | 0  | -1 | -1 | 0 |
| 8.652402 | 1  | 1  | 1  | 0 |
| 10.56624 | -1 | 0  | 0  | 0 |
| 9.904564 | -1 | 0  | -1 | 0 |
| 10.90502 | -1 | -1 | -1 | 0 |
| 9.186608 | 1  | 1  | 1  | 0 |
| 8.063849 | 1  | 1  | 1  | 0 |
| 9.669993 | -1 | -1 | -1 | 0 |
| 8.189976 | -1 | -1 | -1 | 0 |
| 6.268437 | -1 | -1 | -1 | 0 |
| 8.429178 | 1  | 1  | 1  | 0 |
| 8.782853 | -1 | -1 | -1 | 0 |
| 7.863258 | 0  | -1 | -1 | 0 |
| 7.447683 | 1  | 1  | 1  | 0 |
| 9.622524 | 1  | 1  | 1  | 0 |
| 6.733373 | -1 | -1 | -1 | 0 |
| 10.96664 | 1  | 1  | 1  | 0 |
| 7.461779 | -1 | -1 | -1 | 0 |
| 12.22786 | 1  | 1  | 1  | 0 |
| 6.899747 | 0  | -1 | -1 | 0 |
| 8.112384 | 1  | 0  | 0  | 0 |
| 6.455587 | 1  | 1  | 1  | 0 |
| 5.171495 | 0  | -1 | -1 | 0 |

|          |    |    |    |    |
|----------|----|----|----|----|
| 6.617521 | 1  | 1  | 1  | 0  |
| 10.06381 | -1 | -1 | -1 | 0  |
| 6.430108 | -1 | 0  | -1 | 0  |
| 8.719397 | 1  | 1  | 1  | 0  |
| 9.17126  | -1 | -1 | -1 | 0  |
| 6.453519 | -1 | -1 | -1 | 0  |
| 8.149378 | -1 | 0  | 0  | 0  |
| 11.28666 | 1  | 1  | 0  | 0  |
| 7.839487 | 0  | 1  | 1  | 0  |
| 7.985648 | 0  | -1 | -1 | 0  |
| 9.525864 | 0  | -1 | -1 | 0  |
| 9.664272 | 1  | 1  | 1  | 0  |
| 9.167788 | -1 | -1 | -1 | 0  |
| 7.537973 | -1 | -1 | -1 | 0  |
| 10.69066 | 1  | 1  | 0  | 0  |
| 10.47804 | -1 | -1 | -1 | 0  |
| 8.129347 | -1 | 0  | -1 | 0  |
| 8.721146 | -1 | -1 | -1 | 0  |
| 6.552439 | 1  | 1  | 1  | 0  |
| 11.60275 | -1 | -1 | -1 | 0  |
| 6.124858 | 1  | -1 | -1 | 0  |
| 7.673447 | 1  | 1  | 1  | 0  |
| 6.442516 | -1 | -1 | -1 | 0  |
| 11.66361 | 1  | 1  | 1  | 0  |
| 8.579276 | 0  | -1 | -1 | 0  |
| 8.536185 | -1 | -1 | -1 | 0  |
| 7.513902 | 1  | 0  | 1  | 0  |
| 5.614755 | -1 | -1 | -1 | 0  |
| 10.97272 | -1 | -1 | -1 | 0  |
| 7.551345 | -1 | -1 | -1 | 0  |
| 7.444312 | 0  | -1 | -1 | 0  |
| 6.294208 | -1 | -1 | -1 | -1 |
| 6.275106 | -1 | 0  | -1 | 0  |
| 8.275832 | 1  | 1  | 1  | 0  |
| 7.319966 | 0  | -1 | -1 | 0  |

|          |    |    |    |    |
|----------|----|----|----|----|
| 10.99735 | -1 | -1 | -1 | 0  |
| 7.599556 | -1 | -1 | -1 | 0  |
| 12.49464 | 1  | 1  | 1  | 0  |
| 6.995816 | -1 | 0  | 0  | 0  |
| 9.913407 | -1 | -1 | 0  | 0  |
| 5.913329 | 0  | 1  | 1  | 0  |
| 6.864281 | 1  | 0  | 1  | 0  |
| 7.382472 | 1  | 0  | 1  | 1  |
| 8.122167 | 1  | 0  | 1  | 0  |
| 9.133803 | 0  | -1 | -1 | 0  |
| 9.920252 | -1 | -1 | -1 | 0  |
| 8.804438 | 1  | 1  | 1  | 0  |
| 5.350557 | -1 | -1 | -1 | 0  |
| 6.539223 | -1 | -1 | -1 | 0  |
| 6.245705 | -1 | -1 | -1 | 0  |
| 8.312547 | 1  | 1  | 0  | -1 |
| 9.426576 | -1 | -1 | -1 | 0  |
| 7.08201  | 1  | 0  | 0  | 0  |
| 5.059799 | -1 | -1 | -1 | 0  |
| 9.643295 | -1 | 0  | 0  | 0  |
| 8.012897 | 1  | 0  | 1  | 0  |
| 11.1938  | -1 | 0  | -1 | 0  |
| 9.762354 | 1  | 1  | 1  | 0  |
| 6.082895 | 1  | 1  | 1  | 0  |
| 8.109117 | 1  | 1  | 1  | 0  |
| 9.661105 | -1 | -1 | -1 | 0  |
| 12.61418 | -1 | 0  | -1 | 0  |
| 8.32989  | 1  | 1  | 1  | 0  |
| 7.132295 | -1 | 0  | -1 | 0  |
| 10.70906 | 1  | 1  | 1  | 0  |
| 8.057831 | -1 | 0  | -1 | 0  |
| 7.021282 | 1  | 1  | 1  | 0  |
| 5.408458 | -1 | -1 | -1 | 0  |
| 7.762928 | -1 | 0  | -1 | 0  |
| 11.67276 | -1 | 0  | 0  | 0  |

|          |    |    |    |   |
|----------|----|----|----|---|
| 7.668646 | -1 | 0  | -1 | 0 |
| 9.215239 | 0  | 0  | -1 | 0 |
| 11.98768 | 1  | 1  | 1  | 0 |
| 7.354351 | 1  | 1  | 1  | 0 |
| 5.62667  | 0  | 1  | 1  | 0 |
| 7.532144 | 1  | 1  | 1  | 0 |
| 8.100004 | 1  | 1  | 1  | 0 |
| 10.63227 | 1  | 1  | 1  | 0 |
| 9.571283 | 1  | 1  | 1  | 0 |
| 8.418628 | -1 | -1 | -1 | 0 |
| 11.93916 | -1 | -1 | -1 | 0 |
| 4.527395 | 1  | 0  | 0  | 0 |
| 7.520588 | 1  | 0  | 1  | 0 |
| 9.198009 | -1 | -1 | -1 | 0 |
| 8.822691 | 1  | 0  | 1  | 0 |
| 10.36701 | 1  | 1  | 1  | 0 |
| 8.509745 | 0  | 1  | 1  | 0 |
| 6.329885 | 1  | 1  | 1  | 0 |
| 12.43432 | 1  | 0  | 1  | 0 |
| 8.021565 | -1 | -1 | -1 | 0 |
| 7.684298 | 1  | 0  | 1  | 1 |
| 7.679846 | -1 | -1 | -1 | 0 |
| 10.39327 | -1 | -1 | -1 | 0 |
| 7.811994 | 1  | 1  | 1  | 0 |
| 9.481592 | -1 | -1 | -1 | 0 |
| 9.557897 | 1  | 1  | 1  | 0 |
| 4.999685 | -1 | -1 | -1 | 0 |
| 7.865803 | -1 | -1 | -1 | 0 |
| 9.459026 | 1  | 1  | 1  | 0 |
| 5.828611 | -1 | -1 | 0  | 0 |
| 7.96453  | 1  | 1  | 1  | 0 |
| 7.464121 | -1 | -1 | -1 | 0 |
| 11.22831 | -1 | -1 | -1 | 0 |
| 6.70943  | 1  | 1  | 1  | 0 |
| 5.964546 | 1  | 1  | 1  | 0 |

|          |    |    |    |    |
|----------|----|----|----|----|
| 8.429283 | -1 | 0  | -1 | 0  |
| 5.142014 | -1 | -1 | -1 | 0  |
| 9.814304 | -1 | -1 | 0  | 0  |
| 11.61242 | -1 | -1 | -1 | 0  |
| 10.60372 | -1 | -1 | -1 | 0  |
| 8.975376 | 1  | 1  | 1  | 0  |
| 8.729471 | 1  | 0  | 1  | 0  |
| 8.080501 | -1 | 0  | -1 | 0  |
| 8.463453 | 1  | 1  | 1  | 0  |
| 8.263992 | -1 | -1 | -1 | 0  |
| 8.608217 | 1  | 1  | 1  | 0  |
| 5.558897 | -1 | 0  | 0  | 0  |
| 6.627669 | -1 | -1 | -1 | 0  |
| 10.92046 | -1 | 0  | -1 | 0  |
| 12.20437 | 1  | 1  | 1  | 0  |
| 9.764253 | -1 | -1 | -1 | 0  |
| 8.233069 | -1 | 0  | 0  | 0  |
| 7.709441 | 1  | 0  | 0  | 0  |
| 11.91191 | -1 | -1 | -1 | 0  |
| 8.281452 | 1  | 1  | 1  | 0  |
| 4.774771 | -1 | -1 | -1 | 0  |
| 8.545128 | 1  | 1  | 1  | 0  |
| 6.317984 | -1 | -1 | -1 | 0  |
| 10.27137 | 1  | 1  | 1  | 0  |
| 5.643347 | -1 | -1 | -1 | 0  |
| 9.286751 | -1 | -1 | -1 | 0  |
| 8.482163 | -1 | -1 | -1 | 0  |
| 6.447873 | -1 | -1 | -1 | 0  |
| 6.932032 | 1  | 1  | 0  | 0  |
| 6.160619 | -1 | -1 | -1 | 0  |
| 7.450819 | -1 | -1 | -1 | 0  |
| 9.958962 | -1 | 0  | 0  | 0  |
| 5.901869 | -1 | 0  | -1 | -1 |
| 8.204378 | 0  | -1 | -1 | -1 |
| 12.01785 | 1  | 1  | 1  | 0  |

|          |    |    |    |   |
|----------|----|----|----|---|
| 5.411192 | -1 | -1 | -1 | 0 |
| 6.667021 | 0  | 1  | 1  | 0 |
| 10.25086 | 1  | 1  | 1  | 0 |
| 10.39035 | 1  | 1  | 0  | 0 |
| 5.38733  | -1 | -1 | -1 | 0 |
| 5.878845 | 1  | 0  | 0  | 0 |
| 5.782949 | -1 | -1 | -1 | 0 |
| 7.518451 | -1 | -1 | -1 | 0 |
| 9.119847 | 1  | 1  | 1  | 0 |
| 8.421818 | 1  | 1  | 1  | 1 |
| 9.498371 | -1 | -1 | -1 | 0 |
| 7.776266 | -1 | 0  | 0  | 0 |
| 8.291783 | 0  | 1  | 1  | 0 |
| 7.080735 | 1  | 0  | 0  | 0 |
| 7.946521 | 1  | 0  | 1  | 0 |
| 10.41301 | -1 | 0  | -1 | 0 |
| 6.864909 | 1  | 1  | 1  | 0 |
| 8.128156 | -1 | -1 | -1 | 0 |
| 7.126758 | 1  | 0  | 0  | 0 |
| 7.082467 | 0  | -1 | -1 | 0 |
| 5.88237  | -1 | 0  | -1 | 0 |
| 9.548801 | 1  | 1  | 1  | 0 |
| 7.557207 | 1  | 0  | 1  | 0 |
| 10.58542 | -1 | 0  | 0  | 0 |
| 10.90529 | -1 | -1 | -1 | 0 |
| 9.510143 | -1 | -1 | -1 | 0 |
| 10.11234 | -1 | -1 | -1 | 0 |
| 5.927025 | 1  | 1  | 1  | 0 |
| 7.276204 | -1 | -1 | -1 | 0 |
| 10.48263 | 1  | 0  | 0  | 0 |
| 6.788201 | 1  | 1  | 1  | 0 |
| 7.543958 | -1 | 0  | 0  | 0 |
| 9.605497 | -1 | -1 | -1 | 0 |
| 9.498399 | 1  | 1  | 1  | 0 |
| 5.845021 | -1 | -1 | -1 | 0 |



|          |    |    |    |    |
|----------|----|----|----|----|
| 6.351189 | -1 | -1 | -1 | 0  |
| 5.893079 | 1  | 1  | 0  | 0  |
| 9.587734 | -1 | -1 | -1 | 0  |
| 7.586647 | -1 | -1 | -1 | 0  |
| 10.53332 | -1 | -1 | -1 | 0  |
| 10.36638 | 1  | 1  | 1  | 0  |
| 5.838799 | 1  | 1  | 1  | 0  |
| 9.150067 | 1  | 1  | 1  | 0  |
| 10.81203 | -1 | 0  | -1 | 0  |
| 7.889223 | 0  | 0  | 1  | 1  |
| 11.25898 | 1  | 1  | 1  | 0  |
| 8.804611 | 1  | 1  | 1  | 0  |
| 6.35978  | 0  | 0  | -1 | -1 |
| 7.480693 | 1  | 1  | 1  | 0  |
| 8.315631 | 1  | 1  | 1  | 0  |
| 12.03499 | 1  | 1  | 1  | 0  |
| 8.732292 | -1 | -1 | -1 | 0  |
| 12.44815 | 1  | 1  | 1  | 0  |
| 10.74424 | 1  | 1  | 1  | 0  |
| 6.496943 | -1 | -1 | -1 | 0  |
| 6.763906 | 1  | 0  | 1  | 0  |
| 11.27791 | 1  | 1  | 1  | 0  |
| 4.929544 | 1  | 0  | 0  | 0  |
| 6.852237 | -1 | -1 | -1 | 0  |
| 9.930728 | -1 | -1 | 0  | 0  |
| 5.965427 | -1 | -1 | -1 | 0  |
| 9.711131 | 1  | 1  | 1  | 0  |
| 7.83792  | -1 | 0  | 0  | 0  |
| 8.270394 | -1 | -1 | -1 | 0  |
| 5.701719 | 1  | 1  | 0  | 0  |
| 11.13605 | -1 | -1 | -1 | 0  |
| 8.107955 | -1 | -1 | -1 | 0  |
| 6.660274 | -1 | 0  | -1 | -1 |
| 10.01076 | -1 | -1 | -1 | 0  |
| 4.993691 | -1 | -1 | -1 | 0  |

|          |    |    |    |    |
|----------|----|----|----|----|
| 6.706979 | -1 | -1 | -1 | 0  |
| 7.755677 | 0  | -1 | -1 | 0  |
| 11.31935 | 1  | 1  | 1  | 0  |
| 9.805243 | -1 | 0  | -1 | 0  |
| 8.501405 | -1 | -1 | -1 | 0  |
| 10.12252 | -1 | -1 | -1 | 0  |
| 6.454562 | 1  | 1  | 0  | -1 |
| 10.73602 | 1  | 1  | 1  | 0  |
| 7.574247 | 0  | -1 | -1 | 0  |
| 8.806574 | -1 | -1 | -1 | 0  |
| 7.887961 | -1 | -1 | 0  | 0  |
| 10.52419 | 1  | 1  | 1  | 0  |
| 9.108501 | 1  | 1  | 0  | 0  |
| 10.35732 | 1  | 0  | 1  | 0  |
| 8.634921 | -1 | -1 | -1 | 0  |
| 7.525703 | 1  | 1  | 1  | 0  |
| 7.707191 | -1 | -1 | -1 | 0  |
| 8.22719  | 1  | 0  | 1  | 0  |
| 9.116178 | 0  | -1 | -1 | 0  |
| 7.590954 | 1  | 1  | 1  | 0  |
| 12.07036 | 1  | 1  | 1  | 0  |
| 7.534519 | 1  | 1  | 1  | 0  |
| 8.249471 | -1 | -1 | -1 | 0  |
| 13.02975 | 1  | 1  | 1  | 0  |
| 8.433308 | -1 | -1 | -1 | 0  |
| 8.21455  | 1  | 1  | 1  | 0  |
| 9.44283  | -1 | 0  | -1 | 0  |
| 8.6823   | -1 | -1 | -1 | 0  |
| 8.743176 | -1 | 0  | -1 | 0  |
| 6.875866 | -1 | 0  | 0  | 0  |
| 6.029784 | -1 | -1 | -1 | 0  |
| 7.860643 | -1 | 0  | 0  | 0  |
| 8.121414 | 0  | -1 | -1 | 0  |
| 6.323858 | 1  | 0  | 0  | 0  |
| 6.95297  | -1 | -1 | -1 | 0  |

|          |    |    |    |   |
|----------|----|----|----|---|
| 8.674572 | 1  | 1  | 1  | 0 |
| 9.014518 | 0  | 0  | 1  | 0 |
| 12.01597 | 1  | 1  | 1  | 0 |
| 9.237348 | -1 | -1 | 0  | 0 |
| 7.781445 | 1  | 1  | 1  | 0 |
| 10.4016  | -1 | 0  | 0  | 1 |
| 6.312191 | 1  | 1  | 1  | 0 |
| 6.235666 | -1 | -1 | 0  | 0 |
| 8.007222 | -1 | -1 | -1 | 0 |
| 7.245343 | 1  | 1  | 1  | 0 |
| 6.397837 | 0  | 1  | 1  | 0 |
| 7.419621 | -1 | -1 | -1 | 0 |
| 8.613131 | 0  | 1  | 1  | 0 |
| 5.469411 | 1  | 1  | 1  | 0 |
| 6.774475 | -1 | 0  | 0  | 0 |
| 6.309867 | 0  | -1 | -1 | 0 |
| 9.682762 | 0  | 0  | 1  | 0 |
| 5.012307 | 1  | 1  | 1  | 0 |
| 8.22987  | 1  | 1  | 1  | 0 |
| 9.108843 | -1 | -1 | -1 | 0 |
| 7.190471 | -1 | -1 | -1 | 0 |
| 8.830595 | 1  | 1  | 1  | 0 |
| 6.670694 | 1  | 1  | 1  | 0 |
| 5.724311 | -1 | 0  | -1 | 0 |
| 10.22758 | 1  | 1  | 1  | 0 |
| 8.768149 | 1  | 1  | 1  | 0 |
| 8.87557  | -1 | -1 | -1 | 0 |
| 7.052205 | -1 | -1 | -1 | 0 |
| 5.462306 | -1 | -1 | -1 | 0 |
| 8.093953 | 1  | 0  | 1  | 0 |
| 10.09956 | -1 | -1 | -1 | 0 |
| 6.920743 | 1  | 1  | 1  | 0 |
| 7.811076 | 0  | 1  | 1  | 0 |
| 9.761368 | 1  | 0  | 1  | 0 |
| 9.127576 | -1 | 0  | 0  | 0 |

|          |    |    |    |    |
|----------|----|----|----|----|
| 9.939201 | -1 | -1 | -1 | 0  |
| 11.29377 | 1  | 1  | 1  | 0  |
| 8.885381 | 1  | 1  | 1  | 0  |
| 8.191788 | 0  | -1 | -1 | 0  |
| 12.17933 | 1  | 1  | 1  | 0  |
| 9.62037  | 1  | 0  | 1  | 0  |
| 9.568446 | 1  | 0  | 1  | 0  |
| 10.39784 | -1 | 0  | 0  | 0  |
| 6.66398  | -1 | -1 | -1 | 0  |
| 11.41701 | 1  | 1  | 1  | 0  |
| 9.992836 | 1  | 1  | 0  | 0  |
| 11.6396  | 0  | 1  | 1  | 0  |
| 7.676394 | 0  | -1 | -1 | 0  |
| 5.902456 | -1 | -1 | -1 | 0  |
| 9.281914 | 1  | 1  | 1  | 0  |
| 4.948597 | 1  | 0  | 0  | 0  |
| 9.325911 | 0  | 1  | 1  | 0  |
| 4.749459 | 0  | 0  | -1 | -1 |
| 6.068094 | -1 | -1 | -1 | 0  |
| 9.091656 | -1 | -1 | -1 | 0  |
| 7.022309 | -1 | -1 | -1 | 0  |
| 11.73575 | 1  | 0  | 1  | 0  |
| 9.508167 | -1 | 0  | -1 | -1 |
| 6.125679 | -1 | -1 | -1 | 0  |
| 9.915614 | 1  | 1  | 1  | 0  |
| 6.292843 | 1  | 0  | 0  | 0  |
| 6.113023 | 1  | 0  | 0  | 0  |
| 4.894912 | -1 | -1 | -1 | 0  |
| 5.917367 | -1 | 0  | 0  | 0  |
| 9.166748 | 0  | -1 | -1 | 0  |
| 10.46396 | 1  | 1  | 0  | 0  |
| 7.279802 | 0  | 1  | 1  | 0  |
| 7.222127 | -1 | -1 | -1 | 0  |
| 5.402713 | -1 | -1 | 0  | 1  |
| 6.859679 | 1  | 1  | 1  | 0  |

|          |    |    |    |   |
|----------|----|----|----|---|
| 9.278111 | 1  | 0  | 0  | 0 |
| 10.98526 | -1 | -1 | -1 | 0 |
| 11.29187 | -1 | 0  | 0  | 0 |
| 6.048375 | 0  | -1 | -1 | 0 |
| 8.345252 | 0  | 1  | 1  | 0 |
| 5.041596 | 1  | 1  | 0  | 0 |
| 5.921582 | 1  | 0  | 0  | 0 |
| 9.374637 | -1 | -1 | 0  | 1 |
| 7.27024  | 1  | 0  | 1  | 0 |
| 6.265246 | 1  | 1  | 1  | 0 |
| 11.73496 | -1 | -1 | -1 | 0 |
| 9.673169 | 0  | -1 | -1 | 0 |
| 7.877263 | 1  | 0  | 1  | 0 |
| 9.234067 | -1 | -1 | -1 | 0 |
| 7.153078 | 0  | -1 | -1 | 0 |
| 9.49149  | -1 | 0  | -1 | 0 |
| 7.311059 | -1 | -1 | -1 | 0 |
| 5.946954 | -1 | -1 | -1 | 0 |
| 9.977872 | 1  | 1  | 1  | 0 |
| 7.415475 | 1  | 1  | 1  | 0 |
| 10.87563 | 0  | -1 | -1 | 0 |
| 8.604172 | -1 | -1 | -1 | 0 |
| 6.412322 | -1 | -1 | -1 | 0 |
| 9.896864 | -1 | 0  | 0  | 0 |
| 8.681432 | -1 | -1 | -1 | 0 |
| 9.950787 | 1  | 0  | 0  | 0 |
| 10.49546 | 1  | 0  | 1  | 1 |
| 8.790676 | 1  | 1  | 1  | 0 |
| 8.378984 | -1 | -1 | -1 | 0 |
| 10.79026 | 1  | 0  | 0  | 0 |
| 11.5991  | 1  | 0  | 1  | 0 |
| 5.26924  | 1  | 0  | 1  | 0 |
| 10.8016  | 1  | 1  | 1  | 0 |
| 7.634715 | -1 | -1 | 0  | 0 |
| 8.208102 | 1  | 1  | 1  | 0 |

|          |    |    |    |    |
|----------|----|----|----|----|
| 7.795705 | -1 | -1 | -1 | 0  |
| 7.351376 | 1  | 0  | 1  | 0  |
| 8.309109 | -1 | 0  | -1 | 0  |
| 10.24444 | -1 | -1 | -1 | 0  |
| 6.149599 | -1 | -1 | -1 | 0  |
| 7.546632 | -1 | -1 | -1 | 0  |
| 8.269293 | -1 | -1 | 0  | 0  |
| 8.767533 | -1 | -1 | -1 | 0  |
| 7.90976  | 1  | 1  | 1  | 0  |
| 5.093904 | 0  | -1 | -1 | 0  |
| 8.888737 | 1  | 0  | 1  | 0  |
| 9.55716  | 1  | 1  | 0  | 0  |
| 10.04627 | 1  | 1  | 1  | 0  |
| 9.715285 | -1 | -1 | -1 | 0  |
| 11.20366 | -1 | -1 | -1 | 0  |
| 9.277833 | 1  | 1  | 0  | -1 |
| 7.004042 | 1  | 1  | 1  | 0  |
| 6.175486 | 1  | 0  | 1  | 0  |
| 4.783726 | -1 | -1 | -1 | 0  |
| 12.68489 | 1  | 1  | 1  | 0  |
| 9.26253  | -1 | 0  | -1 | 0  |
| 6.970352 | 1  | 1  | 1  | 0  |
| 8.103161 | 1  | 1  | 0  | 0  |
| 9.513676 | 0  | -1 | -1 | 0  |
| 4.891695 | -1 | -1 | -1 | 0  |
| 7.058817 | 1  | 1  | 1  | 0  |
| 8.574158 | 1  | 1  | 1  | 0  |
| 6.589268 | 1  | 1  | 1  | 0  |
| 9.130043 | -1 | 0  | 0  | 0  |
| 8.797774 | 0  | 1  | 1  | 0  |
| 6.632069 | -1 | 0  | -1 | -1 |
| 6.315381 | -1 | -1 | -1 | 0  |
| 6.675395 | -1 | 0  | 0  | 0  |
| 7.786976 | -1 | -1 | -1 | 0  |
| 7.02681  | 1  | 0  | 0  | 0  |

|          |    |    |    |    |
|----------|----|----|----|----|
| 6.417436 | -1 | -1 | -1 | 0  |
| 9.850726 | -1 | 0  | -1 | 0  |
| 7.381436 | 1  | 1  | 0  | 0  |
| 11.30305 | -1 | 0  | -1 | 0  |
| 8.499595 | -1 | -1 | -1 | 0  |
| 9.860966 | 1  | 0  | 1  | 0  |
| 8.478322 | 1  | 0  | 1  | 0  |
| 6.813101 | -1 | 0  | -1 | -1 |
| 11.96066 | -1 | -1 | -1 | 0  |
| 8.682199 | 0  | 0  | -1 | 0  |
| 9.038    | 1  | 0  | 1  | 0  |
| 5.970883 | -1 | -1 | -1 | 0  |
| 7.221696 | 1  | 1  | 1  | 0  |
| 10.3272  | 1  | 0  | 0  | 0  |
| 9.995061 | -1 | 0  | 0  | 0  |
| 7.398007 | 0  | -1 | -1 | 0  |
| 5.951075 | -1 | 0  | -1 | 0  |
| 7.343143 | 0  | -1 | -1 | 0  |
| 7.798885 | -1 | -1 | -1 | 0  |
| 6.45873  | -1 | 0  | 0  | 0  |
| 7.735571 | 1  | 1  | 1  | 0  |
| 6.597753 | 1  | 0  | 1  | 0  |
| 10.68616 | 0  | 1  | 1  | 0  |
| 6.914461 | 1  | 1  | 1  | 0  |
| 11.15159 | 1  | 1  | 1  | 0  |
| 10.25912 | -1 | -1 | 0  | 0  |
| 6.944458 | -1 | -1 | -1 | 0  |
| 10.04213 | -1 | -1 | 0  | 0  |
| 8.118248 | -1 | -1 | -1 | 0  |
| 10.71729 | -1 | -1 | -1 | 0  |
| 8.129718 | -1 | 0  | 0  | 0  |
| 8.545726 | 0  | 1  | 1  | 0  |
| 6.732868 | -1 | 0  | -1 | 0  |
| 8.742163 | -1 | -1 | -1 | 0  |
| 6.000775 | -1 | -1 | -1 | 0  |

|          |    |    |    |    |
|----------|----|----|----|----|
| 8.057008 | 1  | 1  | 1  | 0  |
| 10.29498 | -1 | -1 | -1 | 0  |
| 7.399727 | 0  | 1  | 1  | 0  |
| 9.092219 | -1 | 0  | 0  | 0  |
| 5.854386 | 1  | 1  | 0  | 0  |
| 7.74875  | -1 | -1 | -1 | 0  |
| 7.064047 | -1 | -1 | -1 | 0  |
| 9.371121 | -1 | -1 | -1 | 0  |
| 8.483917 | 0  | 1  | 1  | 1  |
| 11.51847 | -1 | 0  | 0  | 0  |
| 7.216616 | -1 | -1 | -1 | 0  |
| 6.540404 | 1  | 1  | 1  | 0  |
| 6.452741 | 0  | -1 | -1 | 0  |
| 12.95    | 1  | 1  | 0  | 0  |
| 7.483131 | -1 | -1 | -1 | 0  |
| 8.091769 | 1  | 1  | 0  | -1 |
| 9.218122 | 1  | 0  | 0  | 0  |
| 8.253578 | 1  | 1  | 1  | 0  |
| 10.73356 | -1 | 0  | 0  | 0  |
| 10.27183 | 1  | 0  | 0  | 0  |
| 9.368373 | -1 | -1 | -1 | 0  |
| 7.631678 | 1  | 0  | 1  | 0  |
| 11.61932 | 1  | 1  | 0  | 0  |
| 6.706311 | 1  | 1  | 1  | 0  |
| 8.333828 | -1 | 0  | 0  | 0  |
| 6.294116 | 0  | 0  | -1 | -1 |
| 9.305889 | 1  | 1  | 1  | 0  |
| 8.853659 | 1  | 1  | 1  | 0  |
| 9.425355 | 1  | 0  | 1  | 0  |
| 12.66556 | 1  | 1  | 1  | 0  |
| 10.1761  | 1  | 0  | 1  | 0  |
| 9.742045 | 0  | 0  | -1 | 0  |
| 9.537868 | 0  | 1  | 1  | 0  |
| 8.094494 | -1 | -1 | -1 | 0  |
| 10.12092 | -1 | 0  | 0  | 0  |



|          |    |    |    |   |
|----------|----|----|----|---|
| 5.795299 | 1  | 1  | 1  | 0 |
| 11.60452 | 1  | 0  | 1  | 0 |
| 8.098161 | 1  | 0  | 0  | 0 |
| 7.761149 | -1 | 0  | 0  | 0 |
| 7.342079 | -1 | -1 | -1 | 0 |
| 10.26766 | 1  | 0  | 0  | 0 |
| 6.975613 | -1 | 0  | 0  | 0 |
| 6.137107 | 0  | 1  | 1  | 0 |
| 6.735813 | 1  | 1  | 1  | 0 |
| 10.4419  | -1 | 0  | -1 | 0 |
| 9.0203   | 0  | 0  | -1 | 0 |
| 8.698953 | 1  | 0  | 0  | 0 |
| 6.416068 | 0  | 1  | 1  | 0 |
| 10.16133 | -1 | -1 | -1 | 0 |
| 6.789965 | -1 | 0  | -1 | 0 |
| 10.77221 | 1  | 1  | 1  | 0 |
| 7.867838 | -1 | -1 | -1 | 0 |
| 10.11778 | 1  | 1  | 1  | 0 |
| 5.983305 | 1  | 0  | 0  | 0 |
| 8.344659 | 0  | -1 | -1 | 0 |
| 9.606027 | 0  | 1  | 1  | 0 |
| 9.048882 | -1 | 0  | -1 | 0 |
| 6.993607 | 1  | 1  | 1  | 0 |
| 9.657104 | 1  | 0  | 0  | 0 |
| 9.993763 | -1 | 0  | 1  | 0 |
| 11.40003 | -1 | 0  | 0  | 0 |
| 8.000139 | 1  | 0  | 0  | 0 |
| 7.330488 | 1  | 0  | 1  | 1 |
| 8.52009  | 1  | 1  | 1  | 0 |
| 6.873653 | -1 | -1 | -1 | 0 |
| 9.155194 | 1  | 1  | 1  | 0 |
| 7.232167 | -1 | 0  | -1 | 0 |
| 8.385132 | -1 | 0  | 0  | 0 |
| 6.572245 | 1  | -1 | -1 | 0 |
| 12.01299 | 1  | 0  | 1  | 0 |

|          |    |    |    |    |
|----------|----|----|----|----|
| 6.12486  | 1  | 1  | 1  | 0  |
| 10.71667 | -1 | 0  | 0  | 0  |
| 9.375895 | 1  | 0  | 1  | 0  |
| 7.080991 | -1 | 0  | 0  | 0  |
| 6.865617 | 1  | 0  | 0  | 0  |
| 9.020358 | 1  | 1  | 1  | 0  |
| 7.911637 | 1  | 1  | 1  | 0  |
| 12.49554 | 1  | 0  | 1  | 0  |
| 5.64248  | 0  | 0  | 1  | 0  |
| 9.288111 | -1 | -1 | -1 | 0  |
| 7.950445 | -1 | -1 | -1 | 0  |
| 7.181352 | -1 | 0  | 0  | 0  |
| 6.20505  | -1 | -1 | -1 | 0  |
| 7.589682 | 0  | 0  | -1 | 0  |
| 6.355095 | -1 | -1 | 0  | 0  |
| 12.53036 | 1  | 1  | 1  | 0  |
| 7.016706 | -1 | -1 | -1 | 0  |
| 7.70707  | 0  | 0  | 1  | 0  |
| 9.605119 | -1 | -1 | -1 | 0  |
| 11.8352  | -1 | 0  | -1 | 0  |
| 6.31642  | 1  | 0  | 1  | 0  |
| 7.205849 | 1  | 0  | 0  | 0  |
| 10.47375 | 1  | 1  | 1  | 0  |
| 10.00612 | -1 | -1 | -1 | 0  |
| 8.458647 | 1  | 0  | 1  | 0  |
| 5.517646 | 1  | 0  | 0  | -1 |
| 6.167384 | -1 | 0  | -1 | 0  |
| 12.30493 | 1  | 0  | 0  | 0  |
| 8.40133  | 1  | 1  | 1  | 0  |
| 9.503741 | -1 | 0  | 0  | 0  |
| 9.548747 | -1 | 0  | -1 | 0  |
| 8.802891 | -1 | -1 | 0  | 0  |
| 6.330101 | -1 | -1 | 0  | 0  |
| 8.62537  | 0  | -1 | -1 | 0  |
| 7.688119 | -1 | -1 | -1 | 0  |

|          |    |    |    |    |
|----------|----|----|----|----|
| 8.657068 | 1  | 0  | 1  | 0  |
| 7.401992 | 1  | 0  | 0  | 0  |
| 7.293338 | -1 | -1 | -1 | 0  |
| 10.32132 | -1 | -1 | 0  | 0  |
| 8.484764 | -1 | -1 | -1 | 0  |
| 7.47202  | -1 | 0  | 0  | 0  |
| 12.91595 | 1  | 0  | 1  | 0  |
| 6.686045 | -1 | -1 | -1 | 0  |
| 7.59437  | -1 | 0  | 0  | 0  |
| 6.073467 | -1 | -1 | -1 | 0  |
| 6.484354 | -1 | 0  | -1 | -1 |
| 7.777586 | 0  | -1 | -1 | 0  |
| 5.349359 | -1 | -1 | -1 | 0  |
| 8.46613  | -1 | 0  | 0  | 0  |
| 10.80039 | 1  | 1  | 1  | 0  |
| 9.3341   | -1 | 0  | 0  | 0  |
| 6.382774 | -1 | -1 | -1 | 0  |
| 11.02921 | 0  | 0  | -1 | 0  |
| 8.57303  | 0  | -1 | -1 | 0  |
| 9.37322  | 0  | -1 | -1 | 0  |
| 10.07743 | 1  | 1  | 0  | -1 |
| 9.477036 | 1  | 1  | 1  | 0  |
| 10.86673 | 1  | 1  | 1  | 0  |
| 9.459106 | 1  | 1  | 1  | 0  |
| 7.357315 | -1 | -1 | -1 | 0  |
| 7.241356 | 1  | 0  | 0  | 0  |
| 7.939205 | 1  | 1  | 1  | 0  |
| 7.454573 | -1 | 0  | -1 | -1 |
| 4.584482 | -1 | -1 | -1 | 0  |
| 8.848146 | 1  | 1  | 0  | 0  |
| 9.398002 | -1 | -1 | -1 | 0  |
| 7.260144 | 1  | 0  | 1  | 0  |
| 5.23422  | 1  | 0  | 0  | 0  |
| 9.309897 | 1  | 0  | -1 | 0  |
| 6.165055 | -1 | 0  | -1 | 0  |

|          |    |    |    |   |
|----------|----|----|----|---|
| 6.592328 | 1  | 0  | 0  | 0 |
| 7.736973 | 0  | -1 | -1 | 0 |
| 11.84385 | -1 | 0  | 0  | 0 |
| 7.184855 | 0  | 0  | -1 | 0 |
| 8.006035 | 0  | 0  | -1 | 0 |
| 6.233573 | 0  | -1 | -1 | 0 |
| 5.189711 | 0  | -1 | -1 | 0 |
| 11.4693  | -1 | 0  | 0  | 0 |
| 10.57229 | -1 | 0  | -1 | 0 |
| 9.091089 | 1  | 1  | 0  | 0 |
| 9.04756  | -1 | -1 | -1 | 0 |
| 6.936852 | 1  | 0  | 0  | 0 |
| 10.92378 | -1 | -1 | -1 | 0 |
| 11.95182 | 0  | 0  | -1 | 0 |
| 7.944138 | 1  | 0  | 1  | 0 |
| 6.408268 | -1 | -1 | -1 | 0 |
| 12.82177 | 1  | 1  | 1  | 0 |
| 7.621541 | 1  | 0  | 0  | 0 |
| 11.19649 | -1 | 0  | -1 | 0 |
| 7.79356  | 0  | -1 | -1 | 0 |
| 6.411834 | 1  | 1  | 1  | 0 |
| 6.879617 | 1  | 0  | 1  | 0 |
| 7.123392 | 1  | 1  | 1  | 0 |
| 7.150779 | -1 | -1 | -1 | 0 |
| 9.116654 | -1 | -1 | -1 | 0 |
| 14.14518 | 1  | 1  | 1  | 0 |
| 5.671455 | 1  | 1  | 0  | 0 |
| 9.033912 | 1  | 0  | 0  | 0 |
| 7.773454 | 1  | 1  | 1  | 0 |
| 7.338867 | 0  | -1 | -1 | 0 |
| 6.87065  | 1  | 1  | 1  | 0 |
| 6.389469 | 0  | -1 | -1 | 0 |
| 7.5634   | -1 | -1 | 0  | 0 |
| 8.952834 | 1  | 0  | 1  | 0 |
| 11.96836 | 1  | 0  | 1  | 0 |

|          |    |    |    |    |
|----------|----|----|----|----|
| 9.356239 | 1  | 1  | 1  | 0  |
| 7.782521 | 1  | 0  | 0  | 0  |
| 9.488896 | -1 | -1 | -1 | 0  |
| 6.399566 | -1 | -1 | -1 | 0  |
| 7.164778 | 1  | 1  | 1  | 0  |
| 9.352579 | -1 | 0  | -1 | 0  |
| 6.24561  | 1  | 0  | 0  | 0  |
| 9.441285 | -1 | -1 | -1 | 0  |
| 6.486535 | -1 | -1 | -1 | 0  |
| 10.42412 | -1 | 0  | 0  | 0  |
| 8.022746 | 1  | 1  | 1  | 0  |
| 12.01972 | -1 | -1 | -1 | 0  |
| 7.754571 | 1  | 1  | 0  | 0  |
| 6.719021 | 1  | 0  | 0  | 0  |
| 7.196682 | 0  | -1 | -1 | 0  |
| 5.561458 | -1 | 0  | 0  | 0  |
| 7.49037  | -1 | 0  | -1 | 0  |
| 8.775562 | 1  | 0  | 1  | 0  |
| 7.91754  | -1 | 0  | -1 | 0  |
| 7.325783 | -1 | 0  | -1 | -1 |
| 9.786342 | 1  | 1  | 1  | 0  |
| 8.448167 | 1  | 0  | 1  | 0  |
| 7.410944 | -1 | 0  | 0  | 0  |
| 6.901618 | -1 | 0  | 0  | 0  |
| 7.984218 | 1  | 0  | 1  | 0  |
| 9.001115 | 1  | 1  | 0  | 0  |
| 9.527758 | -1 | -1 | -1 | 0  |
| 12.49335 | 1  | 0  | 0  | 0  |
| 10.84059 | -1 | -1 | 0  | 0  |
| 8.770597 | -1 | 0  | -1 | 0  |
| 7.704965 | 0  | 1  | 1  | 0  |
| 9.297785 | -1 | 0  | 0  | 0  |
| 8.70688  | 1  | 1  | 1  | 0  |
| 9.278354 | 1  | 0  | 0  | 0  |
| 7.965223 | 1  | 0  | 1  | 0  |

|          |    |    |    |    |
|----------|----|----|----|----|
| 7.46047  | 1  | 1  | 1  | 0  |
| 5.305552 | -1 | -1 | -1 | 0  |
| 10.39208 | -1 | 0  | 0  | 0  |
| 11.0119  | 0  | -1 | -1 | 0  |
| 10.08861 | -1 | -1 | -1 | 0  |
| 6.241144 | -1 | 0  | 0  | 0  |
| 8.410179 | 1  | 1  | 0  | 0  |
| 6.547989 | 1  | 1  | 0  | -1 |
| 6.046804 | -1 | 0  | 0  | 0  |
| 10.78018 | -1 | 0  | 1  | 0  |
| 5.903717 | -1 | -1 | -1 | 0  |
| 4.930315 | 1  | 0  | 0  | 0  |
| 5.372731 | 1  | 0  | 1  | 0  |
| 7.10268  | -1 | -1 | -1 | 0  |
| 12.38071 | -1 | 0  | 0  | 0  |
| 11.51327 | 1  | 0  | 1  | 0  |
| 9.990315 | 0  | 0  | 1  | 0  |
| 8.931051 | -1 | 0  | 0  | 0  |
| 8.85556  | 1  | 1  | 1  | 0  |
| 7.311641 | 0  | 0  | -1 | 0  |
| 6.732438 | -1 | 0  | -1 | 0  |
| 5.990535 | -1 | 0  | 1  | 1  |
| 8.361234 | 1  | 0  | 1  | 0  |
| 5.483201 | 1  | 1  | 1  | 0  |
| 6.519635 | 0  | 0  | -1 | 0  |
| 9.597083 | 1  | 0  | 1  | 0  |
| 6.299779 | 0  | 0  | -1 | -1 |
| 9.111758 | 0  | 1  | 1  | 0  |
| 6.328383 | 0  | -1 | -1 | 0  |
| 6.460153 | 1  | 0  | 1  | 0  |
| 8.87403  | -1 | 0  | -1 | 0  |
| 8.251078 | -1 | -1 | -1 | 0  |
| 8.47896  | 1  | 1  | 0  | 0  |
| 8.811359 | 1  | 0  | 1  | 0  |
| 6.224525 | -1 | 0  | 0  | 0  |

|          |    |    |    |   |
|----------|----|----|----|---|
| 9.191784 | 1  | 0  | 0  | 0 |
| 12.47211 | -1 | 0  | 0  | 0 |
| 10.50989 | 1  | 0  | 0  | 0 |
| 9.268727 | -1 | 0  | -1 | 0 |
| 7.061671 | -1 | -1 | 0  | 1 |
| 8.570757 | -1 | 0  | 0  | 0 |
| 6.718222 | -1 | -1 | -1 | 0 |
| 12.86556 | 1  | 0  | 1  | 0 |
| 6.487131 | -1 | 0  | -1 | 0 |
| 11.48659 | -1 | -1 | -1 | 0 |
| 11.06075 | 0  | 1  | 1  | 0 |
| 12.42893 | -1 | 0  | 1  | 1 |
| 8.252619 | -1 | 0  | -1 | 0 |
| 10.70407 | 1  | 0  | 0  | 0 |
| 11.6594  | 0  | 1  | 1  | 0 |
| 7.730872 | -1 | 0  | 0  | 0 |
| 8.987203 | 0  | 1  | 1  | 0 |
| 6.642028 | 1  | 0  | 1  | 0 |
| 6.076747 | -1 | 0  | 0  | 0 |
| 11.29892 | 1  | 1  | 1  | 0 |
| 6.308482 | 0  | 0  | -1 | 0 |
| 7.611086 | -1 | -1 | -1 | 0 |
| 7.658417 | 0  | 0  | -1 | 0 |
| 10.33327 | 1  | 1  | 1  | 0 |
| 11.72213 | -1 | -1 | -1 | 0 |
| 8.112467 | 1  | 0  | 1  | 0 |
| 6.400605 | 0  | -1 | -1 | 0 |
| 8.461738 | 1  | 1  | 0  | 0 |
| 5.957823 | 1  | 0  | 1  | 0 |
| 6.259819 | 1  | 1  | 1  | 0 |
| 6.352771 | -1 | 0  | -1 | 0 |
| 5.734304 | 0  | 0  | -1 | 0 |
| 5.503618 | 1  | 0  | 0  | 0 |
| 6.629308 | -1 | 0  | 1  | 1 |
| 8.407492 | 1  | 0  | 1  | 0 |

|          |    |    |    |   |
|----------|----|----|----|---|
| 11.83945 | 1  | 1  | 1  | 0 |
| 6.206923 | -1 | 0  | 0  | 0 |
| 8.341469 | -1 | 0  | -1 | 0 |
| 9.638283 | -1 | 0  | -1 | 0 |
| 8.670424 | 1  | 0  | 1  | 0 |
| 7.379861 | 1  | -1 | -1 | 0 |
| 5.23007  | -1 | -1 | -1 | 0 |
| 8.890322 | -1 | 0  | 0  | 0 |
| 6.72703  | 1  | 1  | 1  | 0 |
| 8.942144 | -1 | 0  | -1 | 0 |
| 9.456644 | 0  | 1  | 1  | 0 |
| 9.393312 | 1  | 0  | 1  | 0 |
| 7.708485 | 1  | 1  | 0  | 0 |
| 6.264362 | -1 | 0  | 0  | 0 |
| 7.258232 | 1  | 0  | 0  | 0 |
| 11.54217 | -1 | 0  | 0  | 0 |
| 8.063663 | 0  | 0  | 1  | 0 |
| 8.082214 | -1 | -1 | 0  | 0 |
| 7.279072 | -1 | -1 | -1 | 0 |
| 7.238658 | -1 | 0  | -1 | 0 |
| 11.00701 | 1  | 0  | 1  | 0 |
| 6.77668  | -1 | -1 | -1 | 0 |
| 9.346713 | 1  | 1  | 0  | 0 |
| 8.047927 | -1 | -1 | -1 | 0 |
| 7.368426 | 0  | 0  | 1  | 0 |
| 8.40524  | 1  | 1  | 1  | 0 |
| 6.129812 | -1 | 0  | -1 | 0 |
| 5.105493 | -1 | -1 | -1 | 0 |
| 7.826754 | 1  | 1  | 1  | 0 |
| 9.962769 | 1  | 0  | 0  | 0 |
| 7.672924 | 0  | -1 | -1 | 0 |
| 8.285678 | 0  | 0  | -1 | 0 |
| 7.514704 | 1  | 0  | 0  | 0 |
| 7.428483 | 0  | 0  | -1 | 0 |
| 7.431028 | 1  | 1  | 1  | 0 |



|          |    |    |    |    |
|----------|----|----|----|----|
| 6.238948 | -1 | -1 | -1 | 0  |
| 7.672668 | -1 | 0  | 0  | 0  |
| 10.8681  | -1 | -1 | -1 | 0  |
| 5.995557 | -1 | 0  | -1 | 0  |
| 5.950742 | 1  | 0  | -1 | 0  |
| 11.97562 | -1 | 0  | -1 | 0  |
| 9.221692 | -1 | -1 | -1 | 0  |
| 9.35094  | -1 | 0  | 0  | 0  |
| 5.419461 | 0  | -1 | 0  | 1  |
| 7.952479 | 0  | 0  | -1 | 0  |
| 5.968062 | 1  | -1 | -1 | 0  |
| 5.945581 | 0  | 1  | 0  | 0  |
| 6.7449   | 0  | 0  | -1 | -1 |
| 13.10894 | 1  | 0  | 1  | 0  |
| 10.74142 | -1 | 0  | -1 | 0  |
| 6.855462 | 0  | -1 | -1 | 0  |
| 7.302236 | -1 | 0  | -1 | 0  |
| 9.369053 | 0  | -1 | -1 | 0  |
| 8.815848 | 0  | -1 | -1 | 0  |
| 6.45905  | 1  | 0  | 0  | 0  |
| 9.681254 | -1 | 0  | -1 | 0  |
| 8.326692 | 1  | 1  | 1  | 0  |
| 7.852673 | 1  | 0  | 0  | 0  |
| 4.998471 | 1  | 0  | 0  | 0  |
| 8.62211  | 1  | 0  | 0  | 0  |
| 8.737517 | -1 | 0  | 0  | 0  |
| 4.75118  | -1 | -1 | 0  | 0  |
| 6.9725   | 1  | 0  | 1  | 0  |
| 6.637417 | 0  | 1  | 0  | -1 |
| 8.708561 | 1  | 1  | 1  | 0  |
| 9.70678  | 0  | 0  | 1  | 0  |
| 5.892831 | -1 | -1 | -1 | 0  |
| 12.15214 | -1 | 0  | 0  | 0  |
| 7.176354 | 0  | 1  | 1  | 0  |
| 8.374664 | -1 | 0  | -1 | 0  |

|          |    |    |    |   |
|----------|----|----|----|---|
| 8.849327 | 0  | 0  | 1  | 0 |
| 8.737377 | 0  | 1  | 1  | 0 |
| 8.005607 | 0  | -1 | -1 | 0 |
| 9.790765 | 0  | 0  | 1  | 0 |
| 12.36207 | -1 | 0  | 0  | 0 |
| 12.12931 | 1  | 0  | 1  | 0 |
| 11.31921 | -1 | 0  | -1 | 0 |
| 5.503489 | 0  | 1  | 1  | 0 |
| 6.994893 | 0  | 0  | 1  | 0 |
| 7.902782 | -1 | -1 | -1 | 0 |
| 8.387429 | 0  | -1 | -1 | 0 |
| 7.070795 | -1 | -1 | -1 | 0 |
| 10.38316 | -1 | -1 | -1 | 0 |
| 7.872052 | 1  | 0  | 0  | 0 |
| 5.678363 | -1 | -1 | 0  | 0 |
| 6.068198 | 1  | 1  | 1  | 0 |
| 5.012185 | 0  | 1  | 1  | 0 |
| 8.308878 | 0  | -1 | -1 | 0 |
| 6.966848 | 1  | 1  | 1  | 0 |
| 9.733772 | 1  | 1  | 1  | 0 |
| 7.253978 | 1  | 0  | 0  | 0 |
| 13.7535  | 1  | 1  | 0  | 0 |
| 6.206699 | -1 | -1 | -1 | 0 |
| 7.806315 | 0  | -1 | -1 | 0 |
| 11.06948 | -1 | 0  | 0  | 0 |
| 8.345082 | 1  | 1  | 1  | 0 |
| 7.44465  | 1  | 1  | 0  | 0 |
| 6.256835 | 0  | 0  | 1  | 0 |
| 7.253246 | 1  | 0  | 0  | 0 |
| 9.56095  | 0  | 0  | 1  | 0 |
| 9.639091 | 1  | 1  | 1  | 0 |
| 9.034744 | 1  | 1  | 1  | 0 |
| 10.24016 | 0  | 1  | 1  | 0 |
| 7.839453 | 1  | 1  | 0  | 0 |
| 6.60155  | 1  | 0  | 1  | 0 |

|          |    |    |    |    |
|----------|----|----|----|----|
| 8.299219 | -1 | -1 | -1 | 0  |
| 10.10737 | -1 | 0  | 0  | 0  |
| 8.674391 | -1 | 0  | -1 | 0  |
| 5.186336 | -1 | -1 | 0  | 0  |
| 10.63225 | 0  | -1 | -1 | 0  |
| 7.330448 | 0  | -1 | -1 | 0  |
| 9.301422 | 1  | 1  | 0  | 0  |
| 7.908223 | 0  | 1  | 0  | -1 |
| 7.699581 | 1  | 0  | 1  | 0  |
| 6.850333 | -1 | -1 | -1 | 0  |
| 9.295348 | -1 | 0  | 0  | 0  |
| 8.756063 | 0  | 0  | -1 | -1 |
| 7.925236 | -1 | -1 | -1 | 0  |
| 7.294191 | -1 | 0  | -1 | 0  |
| 6.944837 | -1 | -1 | 0  | 0  |
| 11.04835 | -1 | -1 | -1 | 0  |
| 7.823813 | 1  | 0  | 1  | 0  |
| 5.366373 | -1 | -1 | -1 | 0  |
| 5.286314 | -1 | -1 | -1 | 0  |
| 9.698429 | 1  | 0  | 1  | 0  |
| 5.415278 | 1  | 0  | 0  | 0  |
| 10.88326 | -1 | 0  | -1 | 0  |
| 9.949948 | 1  | 1  | 0  | 0  |
| 8.389013 | -1 | 0  | 0  | 0  |
| 8.432079 | 1  | 1  | 1  | 0  |
| 7.537245 | -1 | 0  | 0  | 0  |
| 10.71272 | -1 | 0  | 0  | 0  |
| 11.33549 | -1 | -1 | 0  | 0  |
| 7.59082  | -1 | 0  | -1 | 0  |
| 8.224052 | -1 | 0  | 0  | 0  |
| 7.466853 | 0  | 0  | 1  | 0  |
| 7.115397 | 1  | 0  | 0  | 0  |
| 7.292595 | -1 | 0  | 0  | 0  |
| 6.329896 | 0  | -1 | -1 | 0  |
| 7.346127 | 0  | 0  | 1  | 0  |

|          |    |    |    |   |
|----------|----|----|----|---|
| 9.943669 | 1  | 0  | 0  | 0 |
| 11.17694 | 1  | 1  | 1  | 0 |
| 6.759739 | -1 | -1 | 0  | 0 |
| 7.355048 | -1 | 0  | 0  | 0 |
| 8.962913 | 1  | 0  | 0  | 0 |
| 6.245935 | 1  | 1  | 1  | 0 |
| 6.668574 | 1  | 0  | 0  | 0 |
| 8.130885 | -1 | -1 | -1 | 0 |
| 7.928781 | 1  | 1  | 1  | 0 |
| 7.20111  | -1 | 0  | 0  | 0 |
| 6.439073 | 1  | 0  | 1  | 0 |
| 6.916481 | 1  | 1  | 1  | 0 |
| 5.263888 | 1  | 1  | 1  | 0 |
| 7.283676 | 1  | 0  | 1  | 0 |
| 8.926887 | -1 | 0  | -1 | 0 |
| 6.919697 | 1  | 1  | 1  | 0 |
| 5.030804 | 0  | 1  | 1  | 0 |
| 11.94849 | 1  | 0  | 0  | 0 |
| 8.504453 | 1  | 0  | 0  | 0 |
| 8.376572 | -1 | 0  | 0  | 0 |
| 7.249627 | 1  | 0  | 1  | 0 |
| 8.912229 | 0  | -1 | -1 | 0 |
| 6.495564 | -1 | 0  | 1  | 0 |
| 9.786826 | -1 | 0  | -1 | 0 |
| 8.924689 | -1 | 0  | -1 | 0 |
| 9.207105 | 1  | 0  | 0  | 0 |
| 9.062221 | 1  | 0  | 1  | 0 |
| 7.772309 | -1 | -1 | 0  | 0 |
| 7.077703 | 0  | 0  | -1 | 0 |
| 8.786017 | 1  | 1  | 1  | 0 |
| 8.217679 | 1  | 0  | 1  | 0 |
| 6.663156 | -1 | -1 | -1 | 0 |
| 6.239498 | -1 | -1 | -1 | 0 |
| 6.785469 | 0  | 0  | -1 | 0 |
| 8.789247 | 1  | 0  | 1  | 0 |

|          |    |    |    |   |
|----------|----|----|----|---|
| 10.23326 | -1 | -1 | -1 | 0 |
| 6.991321 | 1  | 1  | 1  | 0 |
| 6.744543 | 1  | 0  | 0  | 0 |
| 6.460768 | -1 | -1 | -1 | 0 |
| 11.24963 | -1 | -1 | -1 | 0 |
| 9.888448 | 1  | 0  | 1  | 0 |
| 4.934456 | 0  | -1 | -1 | 0 |
| 7.67156  | 0  | 0  | 1  | 0 |
| 9.218422 | 0  | 1  | 1  | 0 |
| 12.16733 | 1  | 0  | 0  | 0 |
| 8.132432 | -1 | -1 | -1 | 0 |
| 8.669347 | -1 | -1 | 0  | 0 |
| 5.931139 | 1  | 1  | 1  | 0 |
| 9.471242 | 1  | 0  | 1  | 0 |
| 8.087109 | -1 | -1 | -1 | 0 |
| 8.090976 | 0  | -1 | -1 | 0 |
| 8.012926 | -1 | 0  | 0  | 0 |
| 8.156449 | 0  | -1 | -1 | 0 |
| 7.68126  | -1 | -1 | 0  | 1 |
| 7.988516 | -1 | 0  | 0  | 0 |
| 4.720967 | -1 | 0  | -1 | 0 |
| 9.052887 | -1 | -1 | -1 | 0 |
| 9.72738  | -1 | 0  | -1 | 0 |
| 10.9565  | -1 | 0  | 0  | 0 |
| 12.0154  | -1 | 0  | 0  | 0 |
| 5.912103 | 1  | 0  | 0  | 0 |
| 8.572888 | 1  | 1  | 1  | 0 |
| 10.58295 | 1  | 0  | 1  | 0 |
| 8.966786 | -1 | -1 | -1 | 0 |
| 5.846734 | 0  | -1 | -1 | 0 |
| 6.20782  | 0  | 1  | 1  | 0 |
| 9.079676 | -1 | 0  | -1 | 0 |
| 7.162142 | -1 | -1 | -1 | 0 |
| 12.77502 | -1 | 0  | -1 | 0 |
| 11.57273 | 1  | 1  | 1  | 0 |

|          |    |    |    |    |
|----------|----|----|----|----|
| 10.56662 | 1  | 0  | 0  | 0  |
| 11.68417 | 1  | 1  | 1  | 0  |
| 9.671693 | -1 | 0  | -1 | 0  |
| 7.226687 | -1 | -1 | -1 | 0  |
| 5.603983 | -1 | 0  | 0  | 0  |
| 5.665572 | 1  | 1  | 1  | 0  |
| 7.803146 | -1 | -1 | 0  | 0  |
| 10.91016 | -1 | 0  | -1 | 0  |
| 6.431528 | 0  | -1 | -1 | 0  |
| 8.295273 | 0  | 1  | 1  | 0  |
| 4.714294 | 1  | 0  | 0  | 0  |
| 11.45824 | 0  | 1  | 1  | 0  |
| 10.80634 | -1 | 0  | -1 | 0  |
| 10.80218 | 0  | -1 | -1 | 0  |
| 6.280746 | 1  | 1  | 1  | 0  |
| 6.517177 | 0  | 0  | -1 | 0  |
| 9.79683  | -1 | -1 | 0  | 0  |
| 7.843992 | 1  | 0  | 1  | 0  |
| 8.402049 | 1  | 0  | -1 | 0  |
| 9.883453 | -1 | 0  | 0  | 0  |
| 6.160501 | -1 | 0  | -1 | 0  |
| 8.010037 | 1  | 1  | 0  | 0  |
| 5.518719 | 1  | 0  | 0  | 0  |
| 5.628547 | 0  | 0  | -1 | 0  |
| 9.797239 | 0  | 0  | -1 | 0  |
| 5.275556 | 0  | 0  | -1 | -1 |
| 5.554294 | -1 | -1 | -1 | 0  |
| 10.93859 | 0  | 0  | 1  | 0  |
| 7.704955 | 1  | 0  | 1  | 0  |
| 9.457569 | 1  | 1  | 0  | 0  |
| 10.07825 | 1  | 1  | 1  | 0  |
| 8.623462 | 1  | 1  | 1  | 0  |
| 12.10406 | -1 | 0  | -1 | 0  |
| 8.540985 | 0  | -1 | -1 | 0  |
| 6.005421 | 1  | 1  | 1  | 0  |

|          |    |    |    |    |
|----------|----|----|----|----|
| 7.434581 | -1 | 0  | 0  | 0  |
| 7.197747 | -1 | -1 | -1 | 0  |
| 9.887404 | -1 | 0  | -1 | 0  |
| 5.877117 | 0  | -1 | -1 | 0  |
| 8.18798  | 1  | 1  | 1  | 0  |
| 5.905247 | -1 | 0  | -1 | 0  |
| 11.81797 | -1 | 0  | -1 | 0  |
| 8.85951  | -1 | 0  | 0  | 0  |
| 6.325717 | -1 | 0  | -1 | 0  |
| 9.743612 | 0  | -1 | 0  | 0  |
| 5.523604 | 1  | 1  | 0  | 0  |
| 10.73435 | -1 | -1 | 0  | 0  |
| 8.127332 | 1  | 1  | 1  | 0  |
| 4.652519 | 0  | 1  | 0  | -1 |
| 10.20774 | 1  | 1  | 1  | 0  |
| 6.977596 | -1 | 0  | 0  | 0  |
| 7.846814 | -1 | -1 | -1 | 0  |
| 8.980665 | 1  | 0  | 1  | 0  |
| 11.30295 | -1 | -1 | 0  | 1  |
| 9.09118  | -1 | 0  | -1 | 0  |
| 7.216262 | 0  | -1 | -1 | 0  |
| 8.76215  | 0  | 1  | 1  | 0  |
| 10.17453 | 0  | 0  | 1  | 0  |
| 10.32832 | 0  | -1 | -1 | 0  |
| 9.624915 | -1 | 0  | 0  | 0  |
| 11.01404 | 0  | 0  | -1 | 0  |
| 7.098129 | 1  | 0  | 0  | 0  |
| 8.829482 | 0  | 0  | 1  | 0  |
| 7.92973  | -1 | 0  | 0  | 0  |
| 8.861479 | 1  | 0  | 1  | 0  |
| 10.0585  | 0  | 0  | 1  | 1  |
| 4.969278 | 1  | 0  | 0  | 0  |
| 8.927809 | 0  | -1 | -1 | 0  |
| 4.806988 | -1 | -1 | -1 | 0  |
| 7.413007 | 0  | 0  | 1  | 0  |

|          |    |    |    |    |
|----------|----|----|----|----|
| 9.50463  | -1 | 0  | 0  | 0  |
| 9.829093 | 0  | -1 | 0  | 1  |
| 9.438284 | -1 | 0  | 0  | 0  |
| 9.729177 | 0  | 0  | -1 | 0  |
| 7.204545 | -1 | 0  | -1 | 0  |
| 8.513294 | -1 | -1 | -1 | 0  |
| 10.68701 | -1 | -1 | 0  | 0  |
| 8.812499 | -1 | 0  | 0  | 0  |
| 6.835352 | -1 | 0  | 0  | 0  |
| 7.810813 | -1 | -1 | -1 | 0  |
| 4.832624 | 1  | 0  | 0  | 0  |
| 6.747317 | -1 | 0  | 0  | 0  |
| 10.83743 | 1  | 1  | 1  | 0  |
| 7.448326 | 1  | 0  | 0  | 0  |
| 9.132872 | -1 | 0  | -1 | 0  |
| 5.730766 | -1 | -1 | -1 | 0  |
| 8.277149 | 1  | 0  | 1  | 0  |
| 5.913572 | -1 | -1 | -1 | 0  |
| 10.75572 | -1 | -1 | -1 | 0  |
| 6.787403 | -1 | 0  | -1 | 0  |
| 4.94228  | 0  | -1 | 0  | 0  |
| 6.708524 | 0  | 0  | -1 | -1 |
| 5.950376 | -1 | 0  | 0  | 0  |
| 5.490403 | -1 | -1 | -1 | 0  |
| 12.21605 | -1 | -1 | -1 | 0  |
| 8.31148  | 1  | 1  | 1  | 0  |
| 6.137633 | 0  | 0  | -1 | 0  |
| 9.710453 | 0  | 0  | -1 | 0  |
| 5.327351 | -1 | -1 | -1 | 0  |
| 11.90019 | -1 | 0  | 0  | 0  |
| 6.855599 | -1 | 0  | -1 | 0  |
| 6.747731 | -1 | 0  | 0  | 0  |
| 8.589439 | -1 | -1 | 0  | 1  |
| 7.557156 | -1 | 0  | -1 | 0  |
| 10.83499 | -1 | 0  | -1 | 0  |



|          |    |    |    |   |
|----------|----|----|----|---|
| 7.889176 | 1  | 1  | 0  | 0 |
| 6.134749 | -1 | -1 | 0  | 0 |
| 5.050019 | 1  | 0  | 0  | 0 |
| 7.349637 | -1 | 0  | 0  | 0 |
| 10.48868 | -1 | -1 | -1 | 0 |
| 8.628075 | -1 | 0  | 0  | 0 |
| 8.47386  | -1 | 0  | -1 | 0 |
| 5.302857 | 0  | 0  | 1  | 0 |
| 10.62527 | 0  | 0  | 1  | 0 |
| 7.118349 | 0  | 0  | 1  | 1 |
| 7.106687 | 0  | 0  | 1  | 0 |
| 9.468423 | 1  | 0  | 0  | 0 |
| 6.391999 | 1  | 0  | 0  | 0 |
| 4.718729 | -1 | -1 | -1 | 0 |
| 8.114754 | 1  | 0  | 0  | 0 |
| 8.722577 | 0  | 1  | 1  | 0 |
| 7.813437 | 1  | 1  | 1  | 0 |
| 8.165572 | -1 | 0  | 0  | 0 |
| 8.353214 | -1 | 0  | 0  | 0 |
| 8.581977 | -1 | -1 | 0  | 0 |
| 9.129372 | -1 | 0  | -1 | 0 |
| 8.830711 | -1 | 0  | 0  | 0 |
| 9.054391 | 1  | 0  | 1  | 0 |
| 11.42099 | -1 | -1 | -1 | 0 |
| 9.171143 | 1  | 1  | 1  | 0 |
| 7.46318  | 0  | -1 | -1 | 0 |
| 6.793194 | -1 | 0  | -1 | 0 |
| 8.227988 | 0  | -1 | -1 | 0 |
| 8.141858 | 1  | 0  | -1 | 0 |
| 4.724365 | 0  | -1 | -1 | 0 |
| 6.042273 | 1  | 1  | 1  | 0 |
| 6.634826 | 1  | 0  | 0  | 0 |
| 8.353353 | 1  | 0  | 0  | 0 |
| 10.7234  | 1  | 0  | 0  | 0 |
| 7.102401 | 0  | 0  | -1 | 0 |

|          |    |    |    |    |
|----------|----|----|----|----|
| 10.20662 | 0  | 0  | -1 | -1 |
| 8.688815 | 1  | 0  | 0  | 0  |
| 6.696146 | 0  | 0  | 1  | 0  |
| 9.069941 | 1  | 1  | 0  | 0  |
| 6.518753 | 1  | 1  | 0  | -1 |
| 10.3671  | -1 | 0  | -1 | 0  |
| 8.083929 | 0  | 0  | -1 | 0  |
| 10.77847 | -1 | 0  | -1 | 0  |
| 8.301059 | 1  | 0  | 0  | 0  |
| 7.734384 | 0  | 0  | -1 | 0  |
| 8.582268 | -1 | -1 | 0  | 0  |
| 6.438166 | 1  | 0  | 0  | 0  |
| 4.952214 | -1 | -1 | -1 | 0  |
| 11.33003 | 1  | 1  | 1  | 0  |
| 5.548147 | 1  | 0  | 0  | 0  |
| 7.764157 | 1  | 0  | 0  | 0  |
| 10.73027 | 1  | 0  | 0  | 0  |
| 4.741876 | 0  | -1 | -1 | 0  |
| 9.933601 | 1  | 1  | 1  | 0  |
| 5.198738 | 0  | 0  | 1  | 0  |
| 9.604533 | 1  | 1  | 1  | 0  |
| 5.590567 | -1 | -1 | 0  | 1  |
| 7.067929 | 0  | 0  | -1 | 0  |
| 7.021536 | 1  | 0  | -1 | -1 |
| 7.211976 | 0  | 0  | -1 | 0  |
| 8.708099 | -1 | 0  | 0  | 0  |
| 8.417927 | 0  | 0  | -1 | 0  |
| 6.454414 | -1 | -1 | -1 | 0  |
| 4.883813 | 0  | -1 | -1 | 0  |
| 5.34962  | -1 | -1 | -1 | 0  |
| 12.1854  | -1 | 0  | 0  | 0  |
| 9.645939 | -1 | 0  | 0  | 0  |
| 9.966492 | 0  | 1  | 0  | 0  |
| 5.615941 | 0  | 0  | -1 | -1 |
| 6.617324 | 0  | 0  | 1  | 0  |

|          |    |    |    |    |
|----------|----|----|----|----|
| 6.58737  | 1  | 0  | 0  | 0  |
| 7.522502 | -1 | -1 | -1 | 0  |
| 6.151459 | 1  | 1  | 1  | 0  |
| 9.363423 | 0  | 1  | 1  | 0  |
| 6.930595 | 1  | 1  | 1  | 0  |
| 10.44262 | -1 | -1 | -1 | 0  |
| 8.633754 | -1 | 0  | 0  | 0  |
| 8.219123 | 0  | 0  | 1  | 0  |
| 9.625543 | -1 | 0  | 0  | 0  |
| 13.83768 | 1  | 0  | 1  | 0  |
| 12.31316 | -1 | -1 | 0  | 0  |
| 10.08224 | -1 | 0  | -1 | 0  |
| 8.277732 | 1  | 0  | 0  | 0  |
| 6.228605 | 1  | 0  | 0  | 0  |
| 8.772748 | 0  | 0  | -1 | 0  |
| 7.935246 | 1  | 1  | 1  | 0  |
| 10.05984 | -1 | -1 | -1 | 0  |
| 10.37478 | 1  | 0  | 0  | -1 |
| 7.142029 | 0  | 1  | 1  | 0  |
| 8.59778  | 0  | 0  | -1 | 0  |
| 8.996888 | -1 | 0  | 0  | 0  |
| 6.148581 | -1 | -1 | -1 | 0  |
| 7.022161 | 0  | 0  | -1 | 0  |
| 6.775751 | 0  | 1  | 1  | 0  |
| 8.603907 | -1 | -1 | -1 | 0  |
| 13.11156 | -1 | -1 | -1 | 0  |
| 4.547287 | -1 | -1 | -1 | 0  |
| 5.751453 | 1  | 0  | 0  | 0  |
| 12.79631 | -1 | 0  | -1 | 0  |
| 5.621463 | 1  | 0  | 0  | 0  |
| 6.613235 | 0  | -1 | -1 | 0  |
| 9.296702 | -1 | -1 | 0  | 0  |
| 8.800736 | 1  | 1  | 0  | 0  |
| 9.830792 | 1  | 0  | 0  | 0  |
| 6.299521 | 0  | 0  | 1  | 1  |

|          |    |    |    |    |
|----------|----|----|----|----|
| 5.342366 | 1  | 0  | -1 | 0  |
| 5.245465 | 0  | 1  | 0  | 0  |
| 7.849852 | 1  | 0  | 0  | 0  |
| 10.65189 | -1 | 0  | 0  | 0  |
| 5.328564 | -1 | 0  | -1 | 0  |
| 6.854368 | -1 | -1 | -1 | 0  |
| 12.12286 | 1  | 1  | 0  | 0  |
| 11.60529 | 1  | 1  | 0  | 0  |
| 5.612215 | -1 | 0  | 0  | 0  |
| 11.99194 | -1 | 0  | -1 | 0  |
| 5.625428 | 0  | -1 | -1 | 0  |
| 7.049395 | 0  | 1  | 1  | 0  |
| 10.33846 | 1  | 1  | 1  | 0  |
| 6.386873 | 1  | 0  | 0  | 0  |
| 7.569961 | 0  | -1 | -1 | 0  |
| 6.372192 | 0  | 1  | 0  | 0  |
| 7.867797 | 1  | 1  | 1  | 0  |
| 6.182935 | 0  | 0  | -1 | 0  |
| 9.223369 | 1  | 0  | 0  | 0  |
| 6.740507 | 0  | 0  | 1  | 0  |
| 6.815882 | 1  | 0  | 0  | 0  |
| 7.343462 | 0  | 1  | 1  | 0  |
| 6.465114 | 1  | 0  | 0  | 0  |
| 8.995897 | 1  | 1  | 1  | 0  |
| 8.220784 | -1 | 0  | 0  | -1 |
| 9.479326 | 0  | 0  | -1 | 0  |
| 4.794778 | -1 | 0  | -1 | 0  |
| 8.13266  | 1  | 0  | 1  | 0  |
| 7.540337 | 1  | 0  | 1  | 0  |
| 5.456487 | 1  | 0  | 0  | 0  |
| 8.806571 | 0  | 0  | -1 | 0  |
| 7.348765 | 0  | 0  | -1 | 0  |
| 5.208855 | 0  | -1 | -1 | 0  |
| 7.345397 | 0  | -1 | -1 | 0  |
| 8.489336 | -1 | 0  | -1 | 0  |

|          |    |    |    |   |
|----------|----|----|----|---|
| 7.175254 | 0  | 0  | -1 | 0 |
| 5.528602 | 1  | 0  | 0  | 0 |
| 7.273754 | -1 | -1 | 0  | 0 |
| 8.79778  | 0  | 1  | 1  | 0 |
| 4.691403 | -1 | 0  | -1 | 0 |
| 10.99711 | 1  | 0  | 1  | 0 |
| 8.57607  | 1  | 0  | 0  | 0 |
| 6.414087 | 1  | 0  | -1 | 0 |
| 10.02703 | -1 | 0  | 0  | 0 |
| 6.999438 | 0  | -1 | -1 | 0 |
| 11.05003 | -1 | 0  | 0  | 0 |
| 13.07358 | -1 | -1 | -1 | 0 |
| 7.559826 | -1 | 0  | -1 | 0 |
| 9.701233 | 1  | 0  | 1  | 0 |
| 6.130871 | 0  | 1  | 1  | 0 |
| 7.741342 | -1 | 0  | -1 | 0 |
| 12.39015 | -1 | 0  | -1 | 0 |
| 9.990741 | 1  | 1  | 1  | 0 |
| 6.893082 | -1 | -1 | -1 | 0 |
| 7.005104 | -1 | 0  | 0  | 0 |
| 7.202482 | 0  | 1  | 1  | 0 |
| 5.758756 | 0  | 0  | 1  | 0 |
| 5.780816 | -1 | 0  | 0  | 0 |
| 10.10337 | 1  | 0  | 1  | 0 |
| 5.812192 | -1 | 0  | 0  | 0 |
| 10.2725  | -1 | 0  | 0  | 0 |
| 11.71453 | -1 | -1 | 0  | 0 |
| 8.345134 | 0  | 1  | 1  | 0 |
| 10.41126 | -1 | 0  | 0  | 0 |
| 6.505659 | 1  | 0  | 0  | 0 |
| 12.64284 | 0  | 1  | 1  | 0 |
| 10.93154 | 0  | 1  | 1  | 0 |
| 8.685385 | 1  | 0  | 0  | 0 |
| 11.1907  | 1  | 0  | -1 | 0 |
| 8.528457 | -1 | 0  | -1 | 0 |

|          |    |    |    |    |
|----------|----|----|----|----|
| 9.863871 | -1 | 0  | 0  | 0  |
| 8.078522 | -1 | 0  | -1 | 0  |
| 6.111939 | 0  | 0  | -1 | 0  |
| 7.097698 | 0  | -1 | -1 | 0  |
| 5.918546 | 0  | 1  | 1  | 0  |
| 11.91185 | 0  | 0  | 1  | 0  |
| 6.44497  | -1 | -1 | -1 | 0  |
| 8.282526 | 0  | 0  | -1 | 0  |
| 9.896625 | 1  | 0  | 0  | 0  |
| 9.817056 | 0  | 0  | -1 | 0  |
| 7.249922 | 1  | 0  | 1  | 0  |
| 12.62219 | -1 | 0  | 0  | 0  |
| 10.06671 | 1  | 0  | 0  | 0  |
| 8.864353 | 0  | 0  | -1 | 0  |
| 10.02461 | -1 | -1 | -1 | 0  |
| 6.474644 | 0  | 0  | -1 | 0  |
| 5.098184 | -1 | -1 | -1 | 0  |
| 7.16869  | -1 | 0  | -1 | 0  |
| 10.09896 | -1 | 0  | -1 | 0  |
| 8.343486 | 0  | 0  | 1  | 0  |
| 6.749368 | 0  | 1  | 1  | 0  |
| 10.91754 | 0  | -1 | 0  | 1  |
| 6.774854 | 0  | 0  | -1 | 0  |
| 8.534969 | -1 | 0  | 0  | 0  |
| 5.102148 | 1  | 0  | 0  | 0  |
| 7.177895 | -1 | 0  | -1 | 0  |
| 5.397098 | 0  | 0  | -1 | -1 |
| 7.758005 | 1  | 0  | 0  | 0  |
| 8.944887 | 1  | 0  | 1  | 0  |
| 8.771307 | -1 | 0  | 0  | 0  |
| 6.978574 | 0  | -1 | -1 | 0  |
| 8.811576 | -1 | 0  | 0  | 0  |
| 8.730579 | -1 | 0  | -1 | 0  |
| 8.742095 | -1 | -1 | 0  | 0  |
| 11.12026 | 1  | 1  | 1  | 0  |

|          |    |    |    |    |
|----------|----|----|----|----|
| 6.37876  | 0  | -1 | -1 | 0  |
| 5.785337 | -1 | -1 | -1 | 0  |
| 9.543895 | -1 | -1 | -1 | 0  |
| 5.645657 | 0  | 1  | 0  | -1 |
| 12.39374 | -1 | 0  | -1 | 0  |
| 8.327647 | 1  | 1  | 1  | 0  |
| 5.05516  | 1  | 0  | 0  | 0  |
| 9.619304 | 1  | 0  | 0  | 0  |
| 9.239619 | -1 | -1 | -1 | 0  |
| 5.414324 | -1 | -1 | -1 | 0  |
| 12.76246 | -1 | 0  | 0  | 0  |
| 7.316462 | -1 | -1 | -1 | 0  |
| 5.135815 | 0  | 0  | -1 | 0  |
| 11.1731  | 1  | 0  | 1  | 0  |
| 12.97684 | -1 | 0  | -1 | 0  |
| 11.17402 | 0  | 0  | 1  | 1  |
| 10.49648 | 1  | 1  | 1  | 0  |
| 7.886374 | -1 | 0  | 0  | 0  |
| 12.37382 | 0  | 0  | 1  | 0  |
| 11.68328 | -1 | 0  | 0  | 0  |
| 8.038184 | -1 | 0  | 0  | 0  |
| 8.543786 | -1 | 0  | -1 | 0  |
| 11.28283 | 1  | 0  | 0  | 0  |
| 7.582512 | -1 | 0  | 0  | 0  |
| 6.763704 | 0  | 0  | -1 | 0  |
| 6.849115 | -1 | -1 | -1 | 0  |
| 9.697942 | 0  | 0  | 0  | -1 |
| 9.936495 | 1  | 0  | 1  | 0  |
| 8.910182 | -1 | 0  | 0  | 0  |
| 7.53459  | 1  | 1  | 0  | 0  |
| 6.682412 | 1  | 1  | 1  | 0  |
| 7.431597 | 0  | 0  | -1 | 0  |
| 5.59235  | -1 | 0  | 0  | 0  |
| 4.966539 | 0  | -1 | -1 | 0  |
| 5.635531 | -1 | -1 | 0  | 0  |

|          |    |    |    |   |
|----------|----|----|----|---|
| 5.565432 | 0  | 0  | -1 | 0 |
| 7.844839 | 0  | -1 | -1 | 0 |
| 8.773105 | 0  | 1  | 1  | 0 |
| 5.954453 | -1 | -1 | 0  | 0 |
| 5.257786 | -1 | -1 | 0  | 0 |
| 13.65392 | 1  | 0  | 1  | 0 |
| 5.216121 | -1 | -1 | 0  | 0 |
| 5.764441 | 0  | -1 | -1 | 0 |
| 9.845316 | 1  | 1  | 0  | 0 |
| 5.917981 | 0  | 0  | -1 | 0 |
| 7.39911  | -1 | 0  | 0  | 0 |
| 7.349296 | 0  | -1 | 0  | 0 |
| 11.73653 | 0  | 0  | 1  | 0 |
| 6.809485 | 1  | 0  | 1  | 0 |
| 9.064263 | -1 | 0  | 0  | 0 |
| 9.185397 | 1  | 1  | 1  | 0 |
| 11.95357 | -1 | 0  | -1 | 0 |
| 7.48339  | 1  | 0  | 1  | 0 |
| 7.085445 | 1  | 0  | 0  | 0 |
| 9.604847 | 0  | 0  | 1  | 0 |
| 6.934863 | -1 | 0  | -1 | 0 |
| 10.16294 | 1  | 0  | 0  | 0 |
| 10.87483 | 1  | 1  | 1  | 0 |
| 9.741185 | 0  | 1  | 1  | 0 |
| 6.742524 | 0  | 0  | -1 | 0 |
| 11.65324 | 0  | 1  | 1  | 0 |
| 8.463571 | -1 | -1 | 0  | 0 |
| 10.05215 | 1  | 0  | 1  | 0 |
| 7.803806 | 1  | 0  | 1  | 0 |
| 9.227995 | 0  | 1  | 1  | 0 |
| 8.788321 | 1  | 0  | 0  | 0 |
| 5.743065 | 1  | 0  | 0  | 0 |
| 8.206953 | 1  | 0  | 1  | 0 |
| 6.549099 | -1 | 0  | 0  | 0 |
| 8.477619 | 0  | 1  | 1  | 0 |



|          |    |    |    |    |
|----------|----|----|----|----|
| 8.644984 | -1 | -1 | -1 | 0  |
| 7.840195 | -1 | 0  | 0  | 0  |
| 7.496811 | -1 | 0  | 0  | 0  |
| 7.297327 | 1  | 1  | 1  | 0  |
| 7.126113 | 0  | 0  | -1 | -1 |
| 5.895831 | -1 | -1 | 0  | 0  |
| 8.618873 | -1 | 0  | -1 | 0  |
| 5.100078 | 1  | 1  | 0  | 0  |
| 9.527748 | 1  | 1  | 1  | 0  |
| 5.911576 | -1 | 0  | 0  | 0  |
| 8.321863 | 0  | 1  | 1  | 0  |
| 6.312571 | 1  | 0  | 0  | 0  |
| 10.00842 | 0  | 0  | -1 | 0  |
| 8.234898 | 1  | 0  | 0  | 0  |
| 9.96804  | 1  | 0  | 1  | 0  |
| 5.453471 | -1 | 0  | 0  | 0  |
| 9.991619 | 1  | 1  | 1  | 0  |
| 8.826574 | 1  | 1  | 0  | 0  |
| 7.789564 | 1  | 0  | 0  | 0  |
| 7.700508 | 1  | 0  | 0  | 0  |
| 10.19505 | 1  | 0  | 1  | 0  |
| 8.466706 | -1 | 0  | 0  | 0  |
| 5.343824 | 0  | 0  | -1 | 0  |
| 6.736112 | -1 | 1  | 0  | 0  |
| 6.808983 | 0  | 0  | -1 | 0  |
| 10.44032 | 1  | 0  | 0  | 0  |
| 6.838925 | -1 | 0  | -1 | 0  |
| 9.384262 | 0  | 1  | 0  | 0  |
| 8.179028 | 0  | 1  | 1  | 0  |
| 6.662284 | -1 | 0  | 0  | 0  |
| 7.134447 | 1  | 0  | 1  | 0  |
| 8.960911 | -1 | 0  | -1 | 0  |
| 9.983248 | 1  | 0  | 0  | 0  |
| 10.46726 | 1  | 0  | -1 | 0  |
| 5.581332 | 0  | 1  | 1  | 0  |

|          |    |    |    |   |
|----------|----|----|----|---|
| 6.776716 | 1  | 0  | 0  | 0 |
| 10.67308 | -1 | -1 | 0  | 0 |
| 8.620956 | -1 | 0  | -1 | 0 |
| 7.396107 | 1  | 0  | 1  | 0 |
| 6.869493 | 0  | 0  | -1 | 0 |
| 4.568166 | -1 | -1 | -1 | 0 |
| 5.139775 | 0  | -1 | -1 | 0 |
| 9.060014 | -1 | 0  | 0  | 0 |
| 6.518241 | 1  | 1  | 0  | 0 |
| 6.130662 | 1  | 0  | 0  | 0 |
| 10.60634 | -1 | 0  | 1  | 0 |
| 7.191444 | 1  | 0  | 1  | 0 |
| 4.874155 | 0  | 1  | 0  | 0 |
| 5.116265 | -1 | 0  | 0  | 0 |
| 10.44784 | 1  | 0  | 0  | 0 |
| 5.972276 | 0  | 0  | -1 | 0 |
| 7.439692 | 1  | 0  | 0  | 0 |
| 9.795554 | -1 | -1 | 0  | 0 |
| 8.536137 | -1 | 0  | 0  | 0 |
| 11.963   | 1  | 0  | 0  | 0 |
| 9.310179 | 1  | 0  | 1  | 0 |
| 11.35867 | 0  | -1 | -1 | 0 |
| 6.029357 | -1 | 0  | -1 | 0 |
| 9.225649 | -1 | -1 | -1 | 0 |
| 10.26037 | 0  | 0  | 1  | 0 |
| 8.480664 | 1  | 0  | 0  | 0 |
| 5.691788 | 0  | 1  | 1  | 0 |
| 5.507283 | 1  | 0  | 1  | 0 |
| 7.246917 | 1  | 0  | 0  | 0 |
| 7.849736 | 0  | 0  | -1 | 0 |
| 7.916496 | 1  | 0  | 1  | 0 |
| 5.791056 | 0  | 0  | 1  | 0 |
| 8.32583  | -1 | 0  | 0  | 0 |
| 5.706535 | 0  | -1 | -1 | 0 |
| 5.182334 | 0  | -1 | 0  | 0 |

|          |    |    |    |    |
|----------|----|----|----|----|
| 10.28906 | -1 | -1 | -1 | 0  |
| 11.29432 | 1  | 0  | 1  | 0  |
| 9.548921 | 0  | -1 | -1 | 0  |
| 6.986012 | 0  | 0  | 0  | 1  |
| 5.053181 | 0  | -1 | 0  | 1  |
| 7.527454 | 1  | 0  | 1  | 0  |
| 7.419881 | 0  | 0  | -1 | 0  |
| 5.640178 | -1 | 0  | 0  | 0  |
| 10.08848 | 1  | 0  | 1  | 0  |
| 9.442175 | 0  | 1  | 1  | 0  |
| 7.355379 | 0  | 1  | 0  | 0  |
| 9.49111  | 0  | 1  | 1  | 0  |
| 8.385607 | -1 | 0  | 0  | 0  |
| 8.235564 | 0  | 1  | 1  | 0  |
| 6.047849 | 0  | 0  | -1 | 0  |
| 8.332682 | -1 | 0  | -1 | 0  |
| 6.054487 | 0  | 0  | 1  | 0  |
| 12.44892 | -1 | 0  | -1 | 0  |
| 7.444704 | 0  | -1 | -1 | 0  |
| 7.334031 | -1 | 0  | -1 | 0  |
| 5.090531 | -1 | 0  | -1 | 0  |
| 6.897575 | -1 | -1 | -1 | 0  |
| 7.396256 | 1  | 1  | 0  | 0  |
| 10.46666 | 1  | 0  | 0  | 0  |
| 4.535049 | 0  | 0  | 0  | -1 |
| 6.600616 | 0  | 1  | 1  | 0  |
| 10.00847 | 0  | 0  | 1  | 0  |
| 5.047114 | 1  | 1  | 0  | 0  |
| 11.42692 | 0  | 0  | 1  | 0  |
| 9.009684 | 1  | 0  | 0  | 0  |
| 7.585672 | -1 | 0  | -1 | 0  |
| 5.9102   | -1 | 0  | 0  | 0  |
| 8.209976 | 1  | 0  | 0  | 0  |
| 6.992263 | 1  | 0  | 0  | 0  |
| 6.242431 | 1  | 0  | 1  | 0  |

|          |    |    |    |   |
|----------|----|----|----|---|
| 12.16619 | -1 | 0  | 0  | 0 |
| 5.926985 | 1  | 0  | 0  | 0 |
| 10.28279 | 1  | 0  | 1  | 0 |
| 9.427925 | -1 | -1 | -1 | 0 |
| 7.808131 | -1 | 0  | 0  | 0 |
| 6.504996 | 1  | 0  | 0  | 0 |
| 8.834702 | 0  | 0  | 1  | 0 |
| 6.604409 | -1 | -1 | 0  | 0 |
| 8.597298 | 1  | 1  | 1  | 0 |
| 9.392625 | 0  | 1  | 0  | 0 |
| 9.950479 | 0  | 0  | 1  | 0 |
| 12.59462 | 0  | -1 | -1 | 0 |
| 8.749084 | -1 | -1 | -1 | 0 |
| 7.92493  | 1  | 0  | 0  | 0 |
| 10.73744 | 0  | 1  | 1  | 0 |
| 6.574213 | 1  | 1  | 1  | 0 |
| 7.848723 | 1  | 1  | 1  | 0 |
| 6.575158 | 1  | 0  | 0  | 0 |
| 4.460037 | -1 | 0  | -1 | 0 |
| 7.843942 | 0  | 0  | 1  | 0 |
| 7.942659 | -1 | -1 | 0  | 0 |
| 5.966061 | -1 | -1 | 0  | 0 |
| 7.732821 | -1 | 0  | 0  | 0 |
| 10.15309 | 1  | 0  | 1  | 0 |
| 6.733928 | -1 | 0  | 0  | 0 |
| 8.751238 | 0  | 0  | -1 | 0 |
| 11.45013 | 0  | 0  | 1  | 0 |
| 10.48858 | -1 | 0  | -1 | 0 |
| 11.24689 | 0  | 1  | 1  | 0 |
| 9.67832  | 0  | 0  | 1  | 0 |
| 11.0846  | 1  | 1  | 0  | 0 |
| 5.308782 | 1  | 0  | 0  | 0 |
| 8.778398 | -1 | 0  | -1 | 0 |
| 7.487291 | 0  | 0  | 1  | 0 |
| 5.95205  | 0  | -1 | 0  | 0 |

|          |    |    |    |    |
|----------|----|----|----|----|
| 5.944871 | 0  | -1 | -1 | 0  |
| 10.94192 | 1  | 1  | 1  | 0  |
| 5.541522 | -1 | 0  | 0  | 1  |
| 9.569445 | -1 | -1 | -1 | 0  |
| 7.242637 | -1 | 0  | 0  | 0  |
| 8.321387 | -1 | -1 | -1 | 0  |
| 8.552666 | 0  | 1  | 1  | 0  |
| 7.615835 | 0  | 1  | 1  | 0  |
| 5.366818 | 1  | 0  | 0  | 0  |
| 9.523211 | 1  | 0  | 1  | 0  |
| 6.336073 | 1  | 0  | 1  | 0  |
| 5.936943 | 0  | 0  | 1  | 0  |
| 6.419702 | 1  | 1  | 0  | 0  |
| 9.282609 | -1 | 0  | 0  | 0  |
| 8.196031 | 1  | 0  | 0  | 0  |
| 8.029404 | 0  | 0  | 1  | 0  |
| 4.760177 | 1  | 0  | 0  | 0  |
| 6.53183  | 0  | 0  | -1 | 0  |
| 7.187581 | -1 | 0  | 0  | 0  |
| 9.261887 | 0  | 0  | 1  | 0  |
| 12.08985 | 1  | 0  | 1  | 0  |
| 4.529806 | 0  | 1  | 0  | -1 |
| 7.314998 | 0  | -1 | -1 | 0  |
| 7.124437 | -1 | -1 | -1 | 0  |
| 5.845461 | -1 | 0  | 0  | 0  |
| 4.872994 | 1  | 0  | 0  | 0  |
| 5.34271  | 0  | 0  | 1  | 0  |
| 12.15335 | 1  | 1  | 0  | 0  |
| 6.607314 | -1 | 0  | 0  | 0  |
| 9.501892 | 0  | 0  | -1 | 0  |
| 6.122359 | 0  | -1 | 0  | 0  |
| 5.826792 | 0  | 0  | -1 | 0  |
| 6.428813 | -1 | 0  | -1 | 0  |
| 7.788501 | -1 | 0  | 0  | 0  |
| 8.471197 | 0  | 0  | -1 | 0  |

|          |    |    |    |    |
|----------|----|----|----|----|
| 10.23692 | 0  | 0  | 1  | 0  |
| 4.719882 | -1 | -1 | 0  | 0  |
| 8.647366 | 0  | 0  | 1  | 0  |
| 7.141047 | 0  | 0  | 1  | 0  |
| 8.745502 | -1 | -1 | 0  | 0  |
| 8.759221 | -1 | 0  | -1 | 0  |
| 5.324326 | 0  | 0  | 0  | 1  |
| 5.726277 | -1 | -1 | -1 | 0  |
| 8.066781 | -1 | 0  | 0  | 0  |
| 8.845663 | 1  | 0  | 0  | 0  |
| 8.210035 | 0  | 0  | 1  | 0  |
| 5.204162 | -1 | 0  | 0  | 0  |
| 7.142052 | 0  | 1  | 1  | 0  |
| 4.702472 | 1  | 0  | 0  | 0  |
| 6.805161 | 0  | 0  | -1 | 0  |
| 11.09894 | 0  | 1  | 0  | -1 |
| 6.565367 | 0  | 1  | 1  | 0  |
| 6.118149 | 1  | 0  | 0  | 0  |
| 8.218903 | 1  | 1  | 0  | 0  |
| 5.226836 | 0  | 0  | -1 | 0  |
| 7.401722 | -1 | 0  | 0  | 0  |
| 10.59018 | -1 | 0  | 0  | 0  |
| 10.23074 | 0  | -1 | -1 | 0  |
| 7.045265 | -1 | 0  | 1  | 0  |
| 10.63021 | 1  | 0  | 1  | 0  |
| 4.859519 | -1 | -1 | -1 | 0  |
| 5.76846  | 1  | 0  | 1  | 0  |
| 5.240312 | 0  | -1 | 0  | 0  |
| 10.66547 | 0  | 0  | 1  | 0  |
| 5.42439  | 1  | 0  | 0  | 0  |
| 4.472846 | -1 | -1 | -1 | 0  |
| 8.370715 | -1 | 0  | 0  | 0  |
| 6.352424 | -1 | 0  | -1 | 0  |
| 9.792674 | 1  | 1  | 1  | 0  |
| 11.81889 | 1  | 0  | 0  | 0  |

|          |    |    |    |    |
|----------|----|----|----|----|
| 7.79144  | 0  | 0  | -1 | 0  |
| 5.607215 | 0  | -1 | -1 | 0  |
| 6.628611 | -1 | 0  | 0  | 0  |
| 13.06349 | 1  | 0  | 1  | 0  |
| 9.08111  | 0  | 0  | -1 | 0  |
| 8.395374 | 1  | 0  | 1  | 0  |
| 10.28371 | -1 | -1 | -1 | 0  |
| 11.24595 | 1  | 1  | 1  | 0  |
| 5.421134 | 0  | -1 | -1 | 0  |
| 7.080087 | 1  | 0  | 0  | -1 |
| 7.939655 | 1  | 0  | 0  | 0  |
| 8.227795 | -1 | 0  | -1 | 0  |
| 7.747928 | -1 | 0  | 0  | 0  |
| 5.97725  | 1  | 0  | 1  | 1  |
| 8.314187 | -1 | 0  | 0  | 0  |
| 9.841964 | 1  | 0  | 0  | 0  |
| 7.286152 | -1 | 0  | 0  | 0  |
| 10.02915 | 0  | 0  | 1  | 1  |
| 6.832477 | 1  | 1  | 1  | 0  |
| 11.71999 | -1 | -1 | 0  | 0  |
| 11.89155 | -1 | 0  | 0  | 0  |
| 10.5732  | 1  | 1  | 1  | 0  |
| 5.944307 | 0  | -1 | 0  | 0  |
| 8.725817 | 1  | 1  | 0  | 0  |
| 7.828151 | 1  | 1  | 0  | 0  |
| 6.690135 | 0  | 0  | -1 | 0  |
| 8.216948 | -1 | 0  | 0  | 0  |
| 11.94464 | 1  | 0  | 1  | 0  |
| 7.819399 | -1 | 0  | 0  | 0  |
| 9.215303 | 0  | 0  | 1  | 0  |
| 5.219093 | 1  | 0  | 0  | 0  |
| 8.297061 | 1  | 0  | 0  | 0  |
| 6.995714 | 0  | 0  | -1 | 0  |
| 5.08344  | 1  | 1  | 0  | 0  |
| 10.17079 | 0  | 0  | 1  | 0  |

|          |    |    |    |   |
|----------|----|----|----|---|
| 6.006846 | 0  | -1 | -1 | 0 |
| 10.06196 | 1  | 0  | 0  | 0 |
| 6.153221 | 1  | -1 | 0  | 0 |
| 4.445627 | -1 | 0  | -1 | 0 |
| 11.03769 | -1 | 0  | 0  | 0 |
| 5.631716 | -1 | -1 | -1 | 0 |
| 9.747451 | -1 | 0  | -1 | 0 |
| 5.606397 | -1 | 0  | 0  | 0 |
| 8.732409 | -1 | 0  | 1  | 0 |
| 7.677705 | 1  | 1  | 1  | 0 |
| 9.857292 | 0  | 0  | -1 | 0 |
| 9.118676 | -1 | 0  | 0  | 0 |
| 6.883061 | -1 | 0  | -1 | 0 |
| 8.750286 | 1  | 0  | -1 | 0 |
| 5.534061 | 0  | 0  | 1  | 0 |
| 6.477536 | -1 | 0  | -1 | 0 |
| 7.18472  | 0  | -1 | 0  | 0 |
| 12.42036 | 1  | 0  | 1  | 0 |
| 6.882281 | 0  | 0  | -1 | 0 |
| 10.37247 | 0  | 0  | -1 | 0 |
| 9.761867 | 0  | -1 | -1 | 0 |
| 5.404921 | 0  | 1  | 0  | 0 |
| 11.04417 | 1  | 0  | 1  | 0 |
| 6.436645 | -1 | 0  | -1 | 0 |
| 7.415682 | -1 | 0  | -1 | 0 |
| 8.159132 | -1 | 0  | -1 | 0 |
| 10.36368 | 1  | 1  | 0  | 0 |
| 5.31722  | 1  | 0  | 0  | 0 |
| 8.90579  | 0  | 0  | 1  | 0 |
| 7.284045 | 0  | 0  | 1  | 0 |
| 6.941058 | -1 | 0  | 0  | 0 |
| 9.923527 | 1  | 0  | 1  | 0 |
| 7.974035 | 0  | 0  | -1 | 0 |
| 6.951875 | 0  | 0  | -1 | 0 |
| 6.655148 | -1 | 0  | 0  | 0 |



|          |    |    |    |    |
|----------|----|----|----|----|
| 4.984152 | 0  | 0  | 1  | 1  |
| 11.39165 | -1 | 0  | -1 | 0  |
| 6.572701 | -1 | 0  | 0  | 0  |
| 9.146405 | -1 | 0  | -1 | 0  |
| 7.89409  | 0  | 0  | -1 | 0  |
| 9.982709 | -1 | 0  | 0  | 0  |
| 7.743055 | -1 | 0  | 0  | 0  |
| 8.290262 | 0  | 0  | 0  | -1 |
| 6.448387 | -1 | 0  | 0  | 0  |
| 6.631601 | 0  | 0  | 1  | 0  |
| 11.65208 | -1 | -1 | 0  | 0  |
| 7.843993 | -1 | 0  | 0  | 0  |
| 9.741996 | -1 | 0  | 0  | 0  |
| 14.14609 | 0  | 0  | 1  | 0  |
| 7.287403 | -1 | 0  | 0  | 0  |
| 6.221707 | 1  | 0  | 0  | 0  |
| 6.841157 | -1 | 0  | -1 | 0  |
| 10.7622  | -1 | 0  | 0  | 0  |
| 11.87429 | 0  | 0  | -1 | 0  |
| 8.456536 | -1 | 0  | 0  | 0  |
| 9.030928 | -1 | 0  | 0  | 0  |
| 6.894904 | -1 | -1 | 0  | 0  |
| 7.934181 | 1  | 0  | 1  | 0  |
| 10.33962 | -1 | 0  | 0  | 0  |
| 8.994949 | 0  | 0  | 1  | 0  |
| 6.041616 | -1 | 0  | 0  | 0  |
| 6.134023 | -1 | 0  | 0  | 0  |
| 10.69861 | -1 | 0  | 0  | 0  |
| 10.20383 | 0  | 0  | 1  | 0  |
| 6.851459 | -1 | 0  | 0  | 0  |
| 4.923911 | 0  | -1 | -1 | 0  |
| 7.24638  | 1  | 0  | 0  | 0  |
| 12.74339 | -1 | -1 | 0  | 0  |
| 5.770491 | 0  | -1 | -1 | 0  |
| 8.285688 | 0  | 0  | -1 | 0  |

|          |    |    |    |    |
|----------|----|----|----|----|
| 6.715863 | 1  | 0  | 0  | 0  |
| 8.615585 | 0  | 0  | -1 | 0  |
| 9.419793 | 1  | 0  | 0  | 0  |
| 8.082076 | -1 | 0  | -1 | 0  |
| 6.097615 | 1  | 0  | 1  | 0  |
| 4.894183 | 0  | 0  | -1 | 0  |
| 7.366651 | -1 | 0  | 0  | 0  |
| 6.619976 | -1 | -1 | 0  | 0  |
| 8.89084  | -1 | 0  | 0  | 0  |
| 8.176588 | 1  | 0  | 1  | 0  |
| 8.652768 | 0  | 0  | 1  | 1  |
| 5.938542 | -1 | 0  | -1 | 0  |
| 6.583122 | 0  | 0  | 1  | 0  |
| 4.794562 | 1  | 0  | 0  | 0  |
| 6.416711 | 1  | 0  | 1  | 0  |
| 5.758845 | -1 | -1 | -1 | 0  |
| 5.773626 | 0  | 0  | 1  | 0  |
| 8.752995 | 0  | 0  | 1  | 0  |
| 7.913142 | 0  | -1 | -1 | 0  |
| 5.133199 | -1 | 0  | -1 | 0  |
| 7.832651 | 0  | 1  | 0  | -1 |
| 8.565751 | 0  | 1  | 0  | 0  |
| 10.05586 | 1  | 1  | 0  | 0  |
| 7.520647 | 0  | 0  | -1 | 0  |
| 9.56547  | -1 | 0  | 0  | 0  |
| 7.253176 | -1 | 0  | -1 | 0  |
| 6.648934 | 1  | 0  | 0  | 0  |
| 10.78365 | 1  | 0  | 0  | 0  |
| 6.562976 | -1 | 0  | 0  | 0  |
| 8.585065 | 0  | 0  | 1  | 0  |
| 8.378114 | 1  | 0  | 0  | 0  |
| 6.288929 | 0  | 0  | 1  | 0  |
| 8.587715 | 0  | 0  | -1 | 0  |
| 11.571   | -1 | 0  | 0  | 0  |
| 5.499137 | 1  | 0  | 1  | 0  |

|          |    |    |    |   |
|----------|----|----|----|---|
| 7.065454 | 0  | 0  | -1 | 0 |
| 10.34053 | 1  | 0  | 1  | 0 |
| 10.73393 | 0  | 0  | 1  | 0 |
| 6.634026 | 0  | 0  | -1 | 0 |
| 7.499327 | 1  | 0  | 1  | 0 |
| 9.489245 | -1 | 0  | -1 | 0 |
| 8.774568 | 0  | 1  | 0  | 0 |
| 10.22526 | 0  | 0  | -1 | 0 |
| 6.319648 | 1  | 0  | 0  | 0 |
| 8.236232 | -1 | 0  | -1 | 0 |
| 7.785143 | 0  | 0  | 1  | 0 |
| 9.318574 | 1  | 0  | -1 | 0 |
| 5.952723 | -1 | 0  | 0  | 0 |
| 5.85991  | 0  | 1  | 1  | 0 |
| 5.536719 | 0  | -1 | -1 | 0 |
| 9.695147 | -1 | 0  | 0  | 0 |
| 8.234499 | -1 | 0  | 0  | 0 |
| 9.470385 | -1 | 0  | 0  | 0 |
| 10.50604 | 0  | 0  | -1 | 0 |
| 7.56742  | -1 | -1 | 0  | 0 |
| 7.181469 | 0  | 1  | 1  | 0 |
| 7.203084 | 1  | 0  | 0  | 0 |
| 9.601333 | 0  | 0  | 1  | 0 |
| 11.10332 | -1 | 0  | -1 | 0 |
| 8.382397 | -1 | 0  | 0  | 0 |
| 8.328626 | -1 | 0  | -1 | 0 |
| 6.762851 | -1 | 0  | -1 | 0 |
| 9.33747  | -1 | 0  | 0  | 0 |
| 6.803341 | -1 | 0  | 0  | 0 |
| 5.830386 | -1 | 0  | 0  | 0 |
| 11.38042 | -1 | 0  | -1 | 0 |
| 6.248074 | 1  | 0  | 0  | 0 |
| 7.79101  | -1 | 0  | 0  | 0 |
| 11.38992 | 0  | 0  | -1 | 0 |
| 12.87171 | -1 | 0  | 0  | 0 |

|          |    |    |    |    |
|----------|----|----|----|----|
| 9.162075 | 1  | 0  | 1  | 0  |
| 9.10723  | 0  | 0  | -1 | 0  |
| 8.461569 | 0  | 0  | 1  | 1  |
| 4.678227 | -1 | 0  | -1 | 0  |
| 8.513714 | -1 | -1 | 0  | 0  |
| 10.58565 | 1  | 1  | 1  | 0  |
| 7.616011 | -1 | 0  | 0  | 0  |
| 7.856115 | 0  | 0  | 1  | 0  |
| 9.603791 | 0  | 0  | -1 | 0  |
| 5.344679 | -1 | -1 | 0  | 0  |
| 6.514642 | -1 | 0  | 0  | 0  |
| 9.695492 | -1 | 0  | -1 | 0  |
| 7.294661 | -1 | 0  | 0  | 0  |
| 8.222092 | -1 | 0  | -1 | 0  |
| 10.8671  | 0  | 0  | 1  | 0  |
| 5.783092 | 1  | 0  | 0  | 0  |
| 5.784196 | 0  | 0  | -1 | 0  |
| 6.535888 | 1  | 0  | 0  | 0  |
| 9.778868 | 1  | 0  | 1  | 0  |
| 6.88667  | -1 | 0  | 1  | 0  |
| 5.281772 | -1 | -1 | 0  | 0  |
| 5.702403 | 0  | 0  | -1 | 0  |
| 9.43099  | -1 | 0  | 0  | 0  |
| 7.285618 | 0  | 0  | 1  | 0  |
| 5.854186 | 1  | 0  | 1  | 0  |
| 5.937705 | -1 | -1 | 0  | 0  |
| 6.23237  | 0  | 0  | -1 | 0  |
| 6.697263 | 1  | 0  | 0  | 0  |
| 8.533975 | -1 | 0  | -1 | 0  |
| 10.25028 | 1  | 0  | 0  | 0  |
| 8.254994 | 0  | 0  | 1  | 0  |
| 9.166862 | 0  | 1  | 0  | 0  |
| 6.882558 | -1 | 0  | 0  | 0  |
| 9.96961  | 1  | 0  | 0  | 0  |
| 8.520583 | 0  | 0  | 0  | -1 |

|          |    |   |    |   |
|----------|----|---|----|---|
| 7.637044 | 1  | 0 | 0  | 0 |
| 7.28867  | 0  | 1 | 0  | 0 |
| 8.22751  | 0  | 0 | -1 | 0 |
| 6.096066 | -1 | 0 | 0  | 0 |
| 6.810024 | 0  | 1 | 1  | 0 |
| 12.67092 | 0  | 0 | 1  | 0 |
| 7.672154 | -1 | 0 | 0  | 0 |
| 5.074456 | 1  | 0 | 0  | 0 |
| 6.288945 | 0  | 0 | -1 | 0 |
| 6.774882 | 0  | 0 | 1  | 0 |
| 13.02777 | 1  | 0 | 0  | 0 |
| 5.022764 | 0  | 0 | 1  | 0 |
| 10.68194 | -1 | 0 | 0  | 0 |
| 5.261624 | 1  | 0 | 0  | 0 |
| 12.46909 | -1 | 0 | 0  | 0 |
| 6.288677 | 1  | 0 | 0  | 0 |
| 4.815514 | 1  | 1 | 0  | 0 |
| 13.49162 | 0  | 1 | 1  | 0 |
| 8.472181 | 0  | 0 | 1  | 0 |
| 7.267859 | -1 | 0 | 0  | 0 |
| 7.381926 | 1  | 0 | 1  | 0 |
| 9.590887 | 1  | 0 | 1  | 0 |
| 6.748825 | 0  | 0 | 1  | 0 |
| 12.77756 | 1  | 0 | 1  | 0 |
| 4.984867 | 0  | 1 | 0  | 0 |
| 10.46365 | -1 | 0 | -1 | 0 |
| 6.164723 | 1  | 0 | 0  | 0 |
| 5.498383 | 0  | 1 | 1  | 0 |
| 8.100357 | 1  | 0 | 0  | 0 |
| 8.732417 | -1 | 0 | 0  | 0 |
| 6.395898 | 0  | 0 | 1  | 0 |
| 8.0827   | -1 | 0 | 0  | 0 |
| 8.708144 | 0  | 0 | 1  | 0 |
| 5.301768 | 1  | 0 | 0  | 0 |
| 10.03191 | -1 | 0 | -1 | 0 |

|          |    |    |    |   |
|----------|----|----|----|---|
| 6.685215 | 0  | 1  | 1  | 0 |
| 4.799046 | 0  | -1 | -1 | 0 |
| 8.108846 | -1 | 0  | -1 | 0 |
| 10.47771 | 0  | 0  | 1  | 0 |
| 8.074233 | -1 | -1 | 0  | 0 |
| 7.580008 | -1 | 0  | 0  | 0 |
| 6.250929 | 1  | 0  | 0  | 0 |
| 7.046554 | -1 | 0  | -1 | 0 |
| 7.309927 | 0  | 1  | 0  | 0 |
| 8.65303  | -1 | 0  | 0  | 0 |
| 5.398198 | 1  | 0  | 0  | 0 |
| 8.380468 | 1  | 0  | 1  | 0 |
| 6.987208 | 0  | 0  | 0  | 1 |
| 6.209226 | 0  | 0  | 1  | 0 |
| 5.032848 | -1 | 0  | 0  | 0 |
| 8.994683 | -1 | 0  | 0  | 0 |
| 9.272805 | 0  | 0  | -1 | 0 |
| 9.277627 | 0  | 0  | -1 | 0 |
| 5.9963   | 1  | 0  | 0  | 0 |
| 5.556818 | -1 | 0  | 0  | 0 |
| 8.883025 | -1 | 0  | 0  | 0 |
| 12.10485 | 0  | 0  | 1  | 0 |
| 9.277772 | 0  | -1 | 0  | 0 |
| 11.17885 | -1 | 0  | -1 | 0 |
| 8.619821 | 0  | -1 | -1 | 0 |
| 7.892932 | 0  | 0  | 1  | 0 |
| 7.576855 | 0  | 0  | -1 | 0 |
| 6.104794 | 1  | 0  | 0  | 0 |
| 5.378148 | 1  | 0  | 0  | 0 |
| 10.00905 | 1  | 0  | 0  | 0 |
| 6.034785 | 0  | 0  | -1 | 0 |
| 6.651957 | 0  | 0  | -1 | 0 |
| 4.812957 | 0  | 0  | -1 | 0 |
| 5.098233 | 1  | 0  | 0  | 0 |
| 9.917616 | 0  | 0  | -1 | 0 |

|          |    |    |    |    |
|----------|----|----|----|----|
| 7.515473 | 1  | 0  | 0  | 0  |
| 8.051045 | 1  | 0  | 1  | 0  |
| 7.946482 | 0  | 0  | -1 | 0  |
| 11.30163 | -1 | 0  | -1 | 0  |
| 7.287402 | 0  | -1 | -1 | 0  |
| 9.709815 | 1  | 1  | 0  | 0  |
| 5.010067 | 0  | 1  | 1  | 0  |
| 5.405491 | 0  | 0  | -1 | 0  |
| 5.236476 | -1 | 0  | 0  | 0  |
| 9.454003 | 0  | 0  | 1  | 0  |
| 10.75435 | 1  | 1  | 1  | 0  |
| 8.055177 | -1 | 0  | 0  | 0  |
| 8.211897 | 1  | 1  | 1  | 0  |
| 7.899155 | -1 | 0  | 0  | 0  |
| 10.90899 | 1  | 0  | 1  | 0  |
| 8.025732 | -1 | -1 | 0  | 0  |
| 5.17155  | -1 | -1 | 0  | 0  |
| 7.276308 | 1  | 0  | 0  | 0  |
| 7.146317 | -1 | 0  | 0  | 0  |
| 7.213589 | 0  | 0  | -1 | 0  |
| 10.10033 | 1  | 0  | 0  | 0  |
| 12.33676 | 0  | 0  | 1  | 0  |
| 9.114392 | 0  | 1  | 1  | 0  |
| 9.093217 | 1  | 0  | 0  | 0  |
| 8.282286 | 0  | -1 | -1 | 0  |
| 5.604933 | 0  | 0  | -1 | 0  |
| 9.991118 | 1  | 0  | 1  | 0  |
| 9.647112 | -1 | 0  | -1 | 0  |
| 9.010926 | 0  | -1 | -1 | 0  |
| 5.658845 | -1 | 0  | 0  | 0  |
| 7.335832 | -1 | 0  | 0  | 0  |
| 5.185313 | -1 | -1 | 0  | 0  |
| 7.238819 | 1  | 0  | 1  | 0  |
| 6.927781 | 0  | 0  | 0  | -1 |
| 9.577273 | 0  | -1 | 0  | 0  |

|          |    |    |    |   |
|----------|----|----|----|---|
| 9.337045 | 1  | 0  | 1  | 0 |
| 6.069161 | 1  | 1  | 0  | 0 |
| 5.927104 | 1  | 0  | 0  | 0 |
| 5.992126 | -1 | 0  | 0  | 0 |
| 10.68134 | 0  | 0  | 1  | 0 |
| 7.244489 | 0  | 0  | -1 | 0 |
| 5.718385 | 1  | 0  | 0  | 0 |
| 11.84214 | -1 | 0  | 0  | 0 |
| 4.988704 | 0  | -1 | -1 | 0 |
| 8.5718   | 0  | 0  | -1 | 0 |
| 8.779806 | -1 | 0  | 0  | 0 |
| 4.988549 | 1  | 0  | 0  | 0 |
| 7.352398 | 1  | 0  | 0  | 0 |
| 11.3722  | -1 | 0  | 0  | 0 |
| 8.377412 | 1  | 0  | 1  | 0 |
| 8.578097 | -1 | 0  | 0  | 0 |
| 8.326255 | 1  | 0  | 1  | 0 |
| 6.843979 | 0  | 0  | 1  | 0 |
| 9.313422 | 1  | 1  | 1  | 0 |
| 8.379234 | 1  | 0  | 0  | 0 |
| 5.549412 | -1 | 0  | -1 | 0 |
| 8.36013  | 0  | -1 | -1 | 0 |
| 7.924337 | -1 | 0  | 0  | 0 |
| 6.935241 | 0  | 0  | 1  | 0 |
| 10.12697 | 0  | 0  | 1  | 0 |
| 7.497851 | -1 | 0  | -1 | 0 |
| 10.81815 | -1 | 0  | 0  | 0 |
| 6.936419 | 0  | 0  | 1  | 0 |
| 6.078177 | -1 | -1 | 0  | 0 |
| 5.943988 | 0  | 0  | -1 | 0 |
| 7.204574 | 0  | 0  | -1 | 0 |
| 11.35077 | -1 | 0  | 0  | 0 |
| 7.726013 | 0  | 0  | -1 | 0 |
| 13.3462  | -1 | 0  | -1 | 0 |
| 10.14785 | -1 | -1 | 0  | 0 |



|          |    |    |    |    |
|----------|----|----|----|----|
| 8.798031 | -1 | 0  | 0  | 0  |
| 9.726542 | 1  | 0  | 0  | 0  |
| 5.647965 | 0  | 0  | -1 | 0  |
| 12.37179 | 1  | 1  | 1  | 0  |
| 8.171746 | 1  | 0  | 0  | 0  |
| 8.055849 | 1  | 0  | 0  | 0  |
| 10.00504 | 1  | 0  | 0  | 0  |
| 6.650876 | -1 | 0  | 0  | 0  |
| 5.597483 | 1  | 0  | 1  | 0  |
| 11.86208 | 1  | 0  | 0  | 0  |
| 6.986985 | -1 | -1 | 0  | 0  |
| 6.097119 | -1 | -1 | 0  | 0  |
| 5.411127 | 0  | 0  | 1  | 0  |
| 4.793003 | 0  | 0  | -1 | 0  |
| 11.48041 | 1  | 0  | 0  | 0  |
| 10.45669 | 0  | 0  | 1  | 0  |
| 10.6118  | 1  | 1  | 1  | 0  |
| 5.159937 | 0  | 0  | -1 | 0  |
| 10.84568 | 0  | 0  | -1 | 0  |
| 7.432085 | 0  | 0  | 1  | 0  |
| 11.13109 | -1 | 0  | 0  | 0  |
| 6.400727 | -1 | 0  | 0  | 0  |
| 7.061497 | 0  | 0  | 1  | 0  |
| 7.353767 | 1  | 0  | 0  | 0  |
| 4.843852 | 1  | 0  | 0  | 0  |
| 5.098341 | 1  | 0  | 0  | 0  |
| 6.090737 | 0  | 0  | 1  | 0  |
| 13.35949 | 1  | 0  | 0  | 0  |
| 6.118132 | -1 | 0  | 0  | 0  |
| 7.060847 | 0  | 0  | 0  | 1  |
| 7.212593 | 0  | 0  | -1 | -1 |
| 10.02165 | -1 | 0  | 0  | 0  |
| 6.451513 | -1 | 0  | 0  | 0  |
| 7.462823 | -1 | 0  | 0  | 0  |
| 10.48504 | 0  | 0  | 1  | 0  |

|          |    |    |    |    |
|----------|----|----|----|----|
| 11.76249 | 1  | 0  | 0  | 0  |
| 10.76829 | -1 | 0  | 0  | 0  |
| 4.995021 | 0  | 0  | 1  | 0  |
| 8.511464 | 0  | 0  | -1 | 0  |
| 10.55924 | 0  | 1  | 1  | 0  |
| 6.622349 | 0  | 0  | -1 | 0  |
| 8.756183 | 0  | -1 | -1 | 0  |
| 7.495149 | 1  | 0  | 0  | 0  |
| 7.119793 | -1 | 0  | 0  | 0  |
| 4.894598 | -1 | -1 | 0  | 0  |
| 8.614297 | 0  | 1  | 1  | 0  |
| 7.792736 | 0  | 0  | 1  | 0  |
| 6.04592  | 0  | 0  | 1  | 0  |
| 7.136357 | -1 | 0  | 0  | -1 |
| 8.698474 | 1  | 0  | 0  | 0  |
| 5.555154 | 1  | 1  | 0  | 0  |
| 7.938346 | 0  | 0  | -1 | 0  |
| 9.479789 | 0  | 0  | -1 | 0  |
| 10.01209 | 1  | 0  | 1  | 0  |
| 9.048641 | -1 | 0  | 0  | 0  |
| 6.718009 | -1 | 0  | -1 | 0  |
| 5.843564 | 1  | 0  | 1  | 0  |
| 6.581889 | 0  | 1  | 1  | 0  |
| 7.12532  | 0  | 0  | -1 | 0  |
| 8.7804   | 0  | 0  | 1  | 0  |
| 6.770858 | 0  | 0  | -1 | 0  |
| 6.765505 | 1  | 0  | 0  | 0  |
| 7.085221 | 0  | 0  | -1 | 0  |
| 8.166522 | 0  | 1  | 0  | 0  |
| 6.146153 | 1  | 1  | 0  | 0  |
| 5.370133 | 0  | 0  | 1  | 0  |
| 7.744404 | 0  | 0  | 1  | 0  |
| 6.218249 | -1 | 0  | -1 | 0  |
| 8.482724 | 0  | 1  | 1  | 0  |
| 7.443155 | 0  | 0  | -1 | 0  |

|          |    |    |    |   |
|----------|----|----|----|---|
| 7.474674 | 0  | 0  | 1  | 0 |
| 5.603568 | 0  | 0  | -1 | 0 |
| 5.265262 | 0  | -1 | 0  | 0 |
| 14.16648 | 0  | 1  | 0  | 0 |
| 8.7756   | 1  | 0  | 0  | 0 |
| 5.470049 | 0  | 0  | 0  | 1 |
| 8.017433 | 0  | 0  | -1 | 0 |
| 7.891787 | 0  | -1 | -1 | 0 |
| 10.05561 | 1  | 1  | 0  | 0 |
| 8.084761 | 0  | -1 | 0  | 0 |
| 11.12402 | -1 | 0  | 0  | 0 |
| 5.586321 | 0  | -1 | -1 | 0 |
| 6.546225 | 0  | 1  | 0  | 0 |
| 8.243642 | 1  | 0  | 0  | 0 |
| 8.096884 | 1  | 1  | 0  | 0 |
| 10.72345 | -1 | 0  | 0  | 0 |
| 9.794507 | 1  | 0  | 0  | 0 |
| 7.395607 | -1 | 0  | 0  | 0 |
| 9.036408 | -1 | 0  | 0  | 0 |
| 8.939008 | 0  | -1 | -1 | 0 |
| 6.977246 | 0  | 0  | -1 | 0 |
| 4.904281 | 0  | 1  | 0  | 0 |
| 9.244455 | 1  | 0  | 0  | 0 |
| 7.908032 | 0  | 0  | 1  | 0 |
| 5.300503 | 1  | 0  | 0  | 0 |
| 6.816467 | 0  | 0  | -1 | 0 |
| 11.57118 | 0  | 0  | 1  | 0 |
| 7.730027 | 1  | 0  | 1  | 0 |
| 11.41004 | -1 | 0  | 0  | 0 |
| 8.451511 | 1  | 0  | 0  | 0 |
| 9.799443 | 0  | 1  | 0  | 0 |
| 7.801903 | 1  | 0  | 1  | 0 |
| 11.91636 | 0  | 0  | 1  | 0 |
| 11.71229 | 0  | 1  | 0  | 0 |
| 7.488557 | 0  | -1 | 0  | 0 |

|          |    |    |    |   |
|----------|----|----|----|---|
| 9.753307 | -1 | 0  | -1 | 0 |
| 8.72256  | -1 | -1 | 0  | 0 |
| 7.435085 | 0  | 0  | 1  | 0 |
| 6.506802 | 0  | -1 | 0  | 0 |
| 6.613889 | 1  | 0  | 0  | 0 |
| 4.885149 | 0  | -1 | -1 | 0 |
| 7.063681 | -1 | 0  | 0  | 0 |
| 7.105993 | 0  | -1 | 0  | 0 |
| 6.095787 | 0  | 0  | 1  | 0 |
| 5.060343 | 0  | 1  | 0  | 0 |
| 6.443915 | 1  | 1  | 0  | 0 |
| 10.60853 | -1 | 0  | -1 | 0 |
| 8.716348 | -1 | 0  | 1  | 0 |
| 7.800198 | 1  | 0  | 0  | 0 |
| 5.925688 | 1  | 1  | 0  | 0 |
| 11.00903 | 0  | 0  | 1  | 0 |
| 7.417941 | 0  | 0  | 1  | 0 |
| 10.41475 | 0  | -1 | 0  | 0 |
| 7.820458 | 0  | 0  | -1 | 0 |
| 4.81049  | -1 | -1 | -1 | 0 |
| 6.10144  | 0  | -1 | 0  | 0 |
| 6.56236  | 0  | 0  | 0  | 1 |
| 6.153277 | -1 | 0  | 0  | 0 |
| 5.454145 | 0  | 0  | -1 | 0 |
| 6.167578 | -1 | 0  | 0  | 0 |
| 6.068635 | 1  | 0  | 0  | 0 |
| 4.676602 | -1 | 0  | -1 | 0 |
| 9.153527 | 0  | 0  | 1  | 0 |
| 7.665923 | 0  | 0  | 1  | 0 |
| 5.374478 | -1 | 0  | 0  | 0 |
| 7.069459 | 0  | 0  | -1 | 0 |
| 6.948012 | 0  | -1 | -1 | 0 |
| 11.81381 | 0  | 0  | 1  | 0 |
| 9.848351 | 0  | 0  | 1  | 0 |
| 5.945506 | 1  | 0  | 0  | 0 |

|          |    |    |    |   |
|----------|----|----|----|---|
| 9.173753 | 0  | 0  | -1 | 0 |
| 8.488802 | 0  | 0  | 1  | 1 |
| 7.171971 | 0  | 0  | -1 | 0 |
| 10.46219 | -1 | 0  | 0  | 0 |
| 6.391326 | 0  | 0  | 1  | 0 |
| 10.35029 | 1  | 1  | 0  | 0 |
| 7.833147 | -1 | 0  | 0  | 0 |
| 8.069707 | 1  | 0  | 0  | 0 |
| 5.159483 | 0  | 0  | -1 | 0 |
| 10.2977  | 0  | 0  | 1  | 0 |
| 9.058282 | -1 | 0  | 0  | 0 |
| 12.22741 | 0  | 0  | -1 | 0 |
| 8.423035 | 1  | 1  | 0  | 0 |
| 9.290845 | 1  | 0  | 0  | 0 |
| 6.539985 | 0  | -1 | 0  | 0 |
| 7.648063 | 0  | 0  | -1 | 0 |
| 11.61719 | 0  | 0  | -1 | 0 |
| 7.694711 | 1  | 0  | 0  | 0 |
| 8.520427 | 0  | 0  | -1 | 0 |
| 5.856852 | 1  | 0  | 0  | 0 |
| 5.741628 | 1  | 1  | 0  | 0 |
| 6.191483 | 1  | 0  | 0  | 0 |
| 7.266326 | 1  | 1  | 0  | 0 |
| 6.811972 | -1 | -1 | 0  | 0 |
| 9.087209 | 0  | 1  | 1  | 0 |
| 5.291672 | 1  | 0  | 0  | 0 |
| 4.495068 | -1 | 0  | -1 | 0 |
| 10.00408 | 0  | 0  | -1 | 0 |
| 6.132808 | 0  | 0  | 1  | 0 |
| 8.249646 | -1 | 0  | 0  | 0 |
| 8.805593 | 0  | -1 | 0  | 0 |
| 12.26513 | 1  | 0  | 1  | 0 |
| 6.103174 | 0  | 0  | -1 | 0 |
| 8.395999 | 1  | 0  | 0  | 0 |
| 4.807441 | 1  | 0  | 0  | 0 |

|          |    |    |    |    |
|----------|----|----|----|----|
| 11.14409 | -1 | 0  | 0  | 0  |
| 8.020437 | 0  | 1  | 1  | 0  |
| 10.09957 | -1 | 0  | 1  | 0  |
| 5.060457 | 0  | 0  | 0  | -1 |
| 7.868628 | 0  | -1 | 0  | 0  |
| 6.873144 | 1  | 0  | 0  | 0  |
| 8.444376 | 0  | 0  | 1  | 0  |
| 5.512607 | 1  | 0  | 1  | 0  |
| 5.673374 | 0  | 0  | 1  | 0  |
| 7.992742 | 0  | 1  | 0  | 0  |
| 5.269976 | 0  | 0  | 1  | 0  |
| 4.401232 | 0  | 0  | 0  | -1 |
| 7.889592 | 1  | 0  | 0  | 0  |
| 5.348031 | 0  | -1 | -1 | 0  |
| 6.365588 | 0  | 0  | -1 | 0  |
| 5.965138 | -1 | 0  | 0  | 0  |
| 5.064905 | 0  | 1  | 0  | 0  |
| 6.636551 | 0  | 0  | -1 | 0  |
| 8.879039 | 0  | 0  | 1  | 0  |
| 7.293348 | 0  | 0  | 1  | 0  |
| 10.25943 | -1 | -1 | -1 | 0  |
| 11.63985 | 0  | 0  | 1  | 0  |
| 5.83287  | 0  | 0  | -1 | 0  |
| 9.079334 | -1 | 0  | 0  | 0  |
| 6.13719  | 1  | 0  | 0  | 0  |
| 8.747981 | -1 | 0  | 0  | 0  |
| 10.11849 | -1 | 0  | 0  | 0  |
| 5.560547 | 0  | -1 | 0  | 0  |
| 7.672576 | 0  | 0  | 1  | 0  |
| 7.677798 | -1 | 0  | 0  | 0  |
| 5.12316  | 1  | 0  | 0  | 0  |
| 5.513964 | -1 | 0  | 0  | 0  |
| 8.508673 | 1  | 0  | -1 | 0  |
| 6.98301  | 0  | 1  | 0  | 0  |
| 8.168794 | 1  | 0  | 0  | 0  |

|          |    |    |    |    |
|----------|----|----|----|----|
| 13.68245 | 1  | 0  | 1  | 0  |
| 6.504408 | -1 | -1 | 0  | 0  |
| 9.110162 | 1  | 0  | 0  | 0  |
| 10.37003 | 0  | 0  | -1 | 0  |
| 6.16606  | 1  | 0  | 0  | 0  |
| 7.31591  | 0  | 1  | 0  | 0  |
| 9.164519 | 1  | 0  | 0  | 0  |
| 11.32464 | 0  | 0  | 1  | 0  |
| 4.602522 | 0  | -1 | -1 | 0  |
| 6.678617 | 1  | 0  | 0  | 0  |
| 6.903714 | 0  | 0  | 1  | 0  |
| 6.379674 | 0  | 0  | 1  | 0  |
| 8.250673 | -1 | 0  | 0  | 0  |
| 6.217884 | 1  | 0  | 0  | 0  |
| 5.951665 | 1  | 1  | 0  | 0  |
| 7.920182 | -1 | 0  | 0  | 0  |
| 6.250219 | -1 | 0  | 0  | 0  |
| 6.672398 | -1 | 0  | 0  | 0  |
| 8.223544 | 0  | 1  | 0  | 0  |
| 8.860698 | -1 | -1 | 0  | 0  |
| 8.831703 | -1 | 0  | -1 | 0  |
| 7.90293  | 1  | 0  | 0  | 0  |
| 10.07036 | 0  | 0  | -1 | 0  |
| 5.25262  | 0  | -1 | 0  | 0  |
| 10.00623 | 0  | 0  | 1  | 0  |
| 9.140509 | 0  | -1 | 0  | 0  |
| 8.569454 | 0  | 1  | 0  | 0  |
| 8.615654 | 0  | 0  | 0  | -1 |
| 6.265276 | 0  | 0  | -1 | 0  |
| 9.101848 | 0  | 0  | -1 | 0  |
| 8.63802  | -1 | 0  | -1 | 0  |
| 6.852217 | 1  | 0  | 0  | 0  |
| 7.074542 | 0  | 1  | 0  | 0  |
| 11.63436 | 0  | 0  | 1  | 0  |
| 7.128169 | 0  | 0  | -1 | 0  |

|          |    |    |    |    |
|----------|----|----|----|----|
| 10.17683 | 0  | 0  | -1 | 0  |
| 5.651267 | 0  | 0  | -1 | 0  |
| 7.312881 | -1 | 0  | 0  | 0  |
| 10.2924  | 0  | 0  | 1  | 0  |
| 5.291102 | 1  | 0  | 0  | 0  |
| 8.010225 | -1 | 0  | 0  | 0  |
| 5.185589 | 0  | 1  | 0  | 0  |
| 10.37158 | 1  | 0  | 0  | 0  |
| 12.94277 | 1  | 1  | 0  | 0  |
| 5.388117 | 0  | 1  | 1  | 0  |
| 5.752523 | 0  | 0  | 1  | 0  |
| 11.25448 | 0  | 0  | 1  | 0  |
| 5.205793 | 1  | 0  | 0  | 0  |
| 7.464311 | -1 | 0  | 0  | 0  |
| 11.6895  | -1 | 0  | 0  | 0  |
| 7.273137 | 1  | 0  | 0  | 0  |
| 7.29441  | -1 | 0  | 0  | 0  |
| 9.869425 | 0  | 0  | 1  | 0  |
| 8.311314 | 1  | 0  | 1  | 0  |
| 8.748844 | 1  | 0  | 0  | 0  |
| 5.03665  | 1  | 0  | 0  | 0  |
| 10.43179 | 1  | 0  | 0  | 0  |
| 7.42876  | 0  | 1  | 0  | 0  |
| 9.345799 | 0  | 0  | -1 | 0  |
| 9.032338 | -1 | 0  | 0  | 0  |
| 6.865792 | 1  | 0  | 0  | 0  |
| 9.120463 | 1  | 0  | 0  | 0  |
| 10.45275 | 0  | 0  | -1 | 0  |
| 8.141083 | 0  | -1 | 0  | 0  |
| 10.53955 | 0  | 0  | 1  | 0  |
| 8.547472 | 1  | 0  | 0  | 0  |
| 8.015362 | 0  | 0  | 0  | -1 |
| 11.17445 | 1  | 0  | 0  | 0  |
| 8.118663 | 1  | 0  | 0  | 0  |
| 11.20618 | 0  | 0  | 1  | 0  |



|          |    |    |    |    |
|----------|----|----|----|----|
| 5.761398 | -1 | 0  | 0  | 0  |
| 8.181737 | 0  | 0  | 1  | 0  |
| 5.81308  | 0  | 0  | 0  | 1  |
| 6.743308 | 1  | 0  | 0  | 0  |
| 4.527096 | 1  | 0  | 0  | 0  |
| 8.124835 | -1 | 0  | 0  | 0  |
| 7.123065 | -1 | -1 | 0  | 0  |
| 6.198644 | 0  | 1  | 0  | 0  |
| 7.753144 | 1  | 0  | 0  | 0  |
| 8.48889  | -1 | 0  | 0  | 0  |
| 7.430086 | 0  | 0  | -1 | 0  |
| 9.424393 | -1 | 0  | 0  | 0  |
| 6.021941 | 1  | 1  | 0  | 0  |
| 6.306412 | 0  | 0  | 1  | 0  |
| 6.421525 | 0  | -1 | 0  | 0  |
| 6.067533 | 0  | -1 | 0  | 0  |
| 4.668363 | -1 | 0  | 0  | 0  |
| 9.918035 | 0  | 0  | 1  | 0  |
| 10.54591 | -1 | 0  | 0  | 0  |
| 5.609033 | 0  | 0  | -1 | 0  |
| 8.137601 | 1  | 0  | 0  | 0  |
| 8.848627 | 0  | 0  | -1 | 0  |
| 5.094555 | -1 | 0  | 0  | 0  |
| 5.283478 | 0  | -1 | 0  | 0  |
| 5.280418 | 1  | 0  | 0  | 0  |
| 7.88791  | -1 | 0  | 0  | 0  |
| 4.753529 | 0  | 0  | -1 | -1 |
| 9.60553  | 0  | 1  | 0  | 0  |
| 5.894015 | 0  | -1 | 0  | 0  |
| 5.208105 | 0  | -1 | 0  | 0  |
| 11.81805 | 1  | 0  | 0  | 0  |
| 8.049983 | 0  | 0  | 1  | 0  |
| 7.828613 | 0  | 0  | -1 | 0  |
| 5.293523 | 0  | 1  | 0  | 0  |
| 8.43096  | -1 | 0  | 0  | 0  |

|          |    |    |    |    |
|----------|----|----|----|----|
| 7.032553 | 1  | 0  | 0  | 0  |
| 8.817825 | 1  | 0  | 0  | 0  |
| 9.819555 | 0  | 0  | 1  | 0  |
| 12.32368 | -1 | 0  | 0  | 0  |
| 6.847914 | 0  | -1 | 0  | 0  |
| 10.30751 | 0  | 0  | -1 | 0  |
| 11.35699 | -1 | 0  | 0  | 0  |
| 7.190151 | -1 | -1 | 0  | 0  |
| 10.01448 | 0  | 0  | -1 | 0  |
| 8.346453 | 1  | 0  | 0  | 0  |
| 5.140498 | 1  | 0  | 0  | 0  |
| 6.969837 | 0  | 0  | 0  | 1  |
| 5.481108 | 0  | 0  | 1  | 0  |
| 6.558866 | -1 | 0  | 0  | 0  |
| 7.438468 | 0  | 0  | 1  | 0  |
| 8.036485 | 0  | 0  | 1  | 0  |
| 5.02418  | -1 | 0  | -1 | 0  |
| 8.315253 | 0  | 0  | -1 | 0  |
| 6.664889 | 1  | 0  | 0  | 0  |
| 9.980891 | 0  | -1 | 0  | 0  |
| 4.418102 | 0  | 1  | 0  | -1 |
| 6.569258 | 1  | 0  | 0  | 0  |
| 6.507931 | 0  | 0  | -1 | 0  |
| 9.238544 | 1  | 0  | 0  | 0  |
| 11.23385 | 0  | -1 | 0  | 0  |
| 6.435426 | 0  | 0  | -1 | 0  |
| 5.575987 | -1 | 0  | 0  | 0  |
| 8.407513 | 1  | 0  | 0  | 0  |
| 9.991595 | 0  | 0  | -1 | 0  |
| 7.499042 | 1  | 0  | 1  | 0  |
| 8.031392 | -1 | 0  | 0  | 0  |
| 6.676802 | -1 | 0  | 0  | 0  |
| 5.80643  | 1  | 0  | 0  | 0  |
| 10.05242 | 1  | 1  | 0  | 0  |
| 10.97035 | 0  | 0  | -1 | 0  |

|          |    |    |    |    |
|----------|----|----|----|----|
| 11.0933  | 1  | 0  | 0  | 0  |
| 5.263021 | 1  | 0  | 0  | 0  |
| 7.515178 | 0  | 0  | 1  | 0  |
| 7.868672 | 0  | 0  | -1 | 0  |
| 7.280855 | 0  | 0  | -1 | 0  |
| 8.54894  | 1  | 0  | 0  | 0  |
| 10.44093 | 0  | 0  | -1 | 0  |
| 10.0335  | -1 | 0  | 0  | 0  |
| 7.987347 | -1 | 0  | 0  | 0  |
| 7.819475 | 1  | 0  | 0  | 0  |
| 6.440714 | 0  | 0  | -1 | 0  |
| 11.10981 | 1  | 0  | 0  | 0  |
| 9.431127 | 1  | 0  | 0  | 0  |
| 9.321349 | -1 | 0  | 0  | 0  |
| 7.255385 | -1 | 0  | 0  | 0  |
| 11.72702 | 1  | 1  | 0  | 0  |
| 5.734905 | 0  | 0  | 1  | 0  |
| 8.977267 | 0  | 0  | 1  | 0  |
| 8.633391 | 0  | 0  | -1 | 0  |
| 5.318541 | -1 | 0  | -1 | 0  |
| 6.146335 | 0  | -1 | 0  | 0  |
| 8.884479 | 0  | 0  | 1  | 0  |
| 6.809888 | 0  | 0  | 1  | 0  |
| 11.27488 | 0  | 0  | 1  | 0  |
| 5.096367 | 1  | 0  | 0  | -1 |
| 8.838083 | 0  | 0  | 0  | -1 |
| 5.99011  | 0  | 0  | 1  | 0  |
| 9.500796 | -1 | 0  | 0  | 0  |
| 6.656997 | -1 | -1 | 0  | 0  |
| 11.75532 | -1 | 0  | 0  | 0  |
| 9.096739 | -1 | 0  | 0  | 0  |
| 7.369203 | 0  | 0  | 1  | 0  |
| 8.302813 | -1 | 0  | 0  | 0  |
| 10.43113 | 0  | -1 | 0  | 0  |
| 11.56373 | -1 | 0  | 0  | 0  |

|          |    |   |    |    |
|----------|----|---|----|----|
| 7.284437 | -1 | 0 | 0  | 0  |
| 6.244125 | 0  | 0 | -1 | 0  |
| 6.995027 | 0  | 1 | 0  | 0  |
| 8.088809 | -1 | 0 | 0  | 0  |
| 5.056147 | -1 | 0 | 0  | 0  |
| 5.760095 | 1  | 0 | 0  | 0  |
| 6.159815 | -1 | 0 | 0  | 0  |
| 8.62446  | 0  | 0 | -1 | 0  |
| 11.84452 | 1  | 0 | 0  | 0  |
| 9.579105 | 0  | 0 | -1 | 0  |
| 4.777865 | -1 | 0 | 0  | 0  |
| 5.106769 | -1 | 0 | 0  | 0  |
| 5.775845 | 0  | 0 | 1  | 0  |
| 10.96253 | -1 | 0 | 0  | 0  |
| 5.445625 | 1  | 0 | 0  | 0  |
| 5.61127  | -1 | 0 | 0  | 0  |
| 8.042677 | -1 | 0 | 0  | 0  |
| 8.331691 | 0  | 0 | -1 | 0  |
| 9.57989  | 1  | 0 | 0  | 0  |
| 6.913861 | 0  | 0 | 1  | 0  |
| 7.482288 | 0  | 0 | -1 | 0  |
| 9.40983  | 0  | 0 | 1  | 0  |
| 8.695362 | 0  | 0 | 1  | 0  |
| 4.595973 | 0  | 0 | 0  | -1 |
| 7.92341  | 0  | 0 | -1 | 0  |
| 8.820479 | 1  | 0 | 0  | 0  |
| 9.47615  | 1  | 0 | 0  | 0  |
| 7.939849 | 0  | 0 | 1  | 0  |
| 8.819892 | -1 | 0 | 0  | 0  |
| 7.691775 | 0  | 0 | 0  | 1  |
| 9.92763  | -1 | 0 | 0  | 0  |
| 8.961576 | 0  | 0 | -1 | 0  |
| 7.36653  | 0  | 0 | 1  | 0  |
| 8.029442 | 0  | 0 | 1  | 0  |
| 7.529401 | 0  | 0 | -1 | 0  |

|          |    |   |    |   |
|----------|----|---|----|---|
| 12.89213 | -1 | 0 | 0  | 0 |
| 6.677278 | -1 | 0 | 0  | 0 |
| 7.898211 | 0  | 0 | 1  | 0 |
| 12.19015 | -1 | 0 | 0  | 0 |
| 8.056481 | 0  | 0 | 1  | 0 |
| 7.326129 | 0  | 0 | -1 | 0 |
| 10.30728 | -1 | 0 | 0  | 0 |
| 6.643267 | 0  | 0 | -1 | 0 |
| 6.067319 | -1 | 0 | 0  | 0 |
| 11.70822 | 1  | 0 | 0  | 0 |
| 6.158236 | 0  | 0 | 1  | 0 |
| 8.772333 | 0  | 1 | 0  | 0 |
| 10.94688 | 0  | 0 | 1  | 0 |
| 8.304898 | 1  | 0 | 0  | 0 |
| 8.373781 | 1  | 0 | 0  | 0 |
| 8.739633 | 0  | 0 | -1 | 0 |
| 10.25748 | 1  | 0 | 0  | 0 |
| 7.871476 | 0  | 0 | 1  | 0 |
| 10.93812 | -1 | 0 | 0  | 0 |
| 11.11404 | 0  | 0 | -1 | 0 |
| 5.397553 | 0  | 0 | 1  | 0 |
| 5.965595 | 0  | 0 | 1  | 0 |
| 7.652738 | 0  | 0 | 1  | 0 |
| 11.32463 | 0  | 0 | 1  | 0 |
| 5.203093 | 0  | 1 | 0  | 0 |
| 12.86108 | -1 | 0 | 0  | 0 |
| 8.041013 | 0  | 0 | -1 | 0 |
| 9.76479  | 0  | 0 | 1  | 0 |
| 7.952671 | 0  | 0 | -1 | 0 |
| 8.945164 | 0  | 1 | 0  | 0 |
| 6.842102 | 0  | 0 | 1  | 0 |
| 9.221819 | 0  | 0 | 1  | 0 |
| 6.483587 | 0  | 0 | -1 | 0 |
| 9.896732 | 0  | 0 | 1  | 0 |
| 9.998654 | 1  | 0 | 0  | 0 |

|          |   |    |    |   |
|----------|---|----|----|---|
| 9.032895 | 0 | 1  | 0  | 0 |
| 10.91954 | 0 | 0  | -1 | 0 |
| 6.601074 | 0 | -1 | 0  | 0 |
| 6.448531 | 0 | -1 | 0  | 0 |
| 5.700406 | 1 | 0  | 0  | 0 |
| 10.09495 | 0 | 0  | -1 | 0 |
| 9.615008 | 0 | -1 | 0  | 0 |
| 10.09234 | 0 | -1 | 0  | 0 |
| 7.192956 | 0 | 0  | 1  | 0 |
