# Supplementary material
Source: PubMed Central journal article supplement (PMC3826687)
Supplement: supp_M042051_jlr.M042051-3.pdf [file supp_M042051_jlr.M042051-3.pdf]

| PROBE_ID     | SYMBOL   | WD...Chow | WD_Empty | WD_Tg_Tc | WD_Tg_Tc | AveExpr  | F        | P.Value  | adj.P.Val | Chow     | WD       | WD_Empty |
|--------------|----------|-----------|----------|----------|----------|----------|----------|----------|-----------|----------|----------|----------|
| ILMN_2705324 | Hipk2    | 1.042257  | 0.942314 | 1.500481 | 0.558167 | 5.812927 | 45.59528 | 1.73E-08 | 0.000133  | 4.941664 | 5.983921 | 5.883978 |
| ILMN_1227936 | Cyp2d26  | 1.244765  | 1.335455 | 0.694381 | -0.64107 | 11.53597 | 38.76802 | 5.98E-08 | 0.000133  | 10.71732 | 11.96208 | 12.05277 |
| ILMN_2881681 | Tnrc6c   | 1.016635  | 0.924206 | 1.636324 | 0.712118 | 6.610481 | 34.37547 | 1.47E-07 | 0.000171  | 5.71619  | 6.732824 | 6.640396 |
| ILMN_2642975 | Cyp2d26  | 1.178808  | 1.321149 | 0.642459 | -0.67869 | 11.45541 | 32.96426 | 2.01E-07 | 0.00019   | 10.66981 | 11.84861 | 11.99095 |
| ILMN_2964785 | Zfhx2    | 1.263711  | 0.990677 | 1.530793 | 0.540116 | 6.545724 | 29.28821 | 4.77E-07 | 0.000272  | 5.599429 | 6.86314  | 6.590106 |
| ILMN_2645275 | Mvd      | -0.99707  | -1.21755 | -0.7091  | 0.508453 | 6.873249 | 22.69146 | 2.89E-06 | 0.000573  | 7.60418  | 6.60711  | 6.386626 |
| ILMN_1248181 | Zbtb7    | 1.346494  | 0.993899 | 1.69716  | 0.703261 | 7.248266 | 22.39862 | 3.16E-06 | 0.000573  | 6.238878 | 7.585371 | 7.232776 |
| ILMN_2953596 | E2f5     | -1.32449  | -1.11503 | -0.57417 | 0.540865 | 7.584708 | 22.29007 | 3.27E-06 | 0.00058   | 8.338131 | 7.013638 | 7.223099 |
| ILMN_2473531 | Pik3r1   | 1.13839   | 0.63873  | 1.22887  | 0.59014  | 9.069393 | 21.22097 | 4.57E-06 | 0.000691  | 8.317895 | 9.456285 | 8.956625 |
| ILMN_3062267 | Acot1    | 3.244852  | 3.625319 | 1.11847  | -2.50685 | 7.233771 | 21.03158 | 4.85E-06 | 0.00071   | 5.236611 | 8.481462 | 8.86193  |
| ILMN_1242912 | Pof1b    | -1.62659  | -0.8899  | -0.19243 | 0.697468 | 8.300192 | 20.43193 | 5.90E-06 | 0.000802  | 8.977421 | 7.35083  | 8.087524 |
| ILMN_2528345 | LOC23910 | 0.871927  | 0.426436 | 1.22485  | 0.798414 | 6.488094 | 20.16128 | 6.45E-06 | 0.000857  | 5.85729  | 6.729218 | 6.283727 |
| ILMN_1240471 | 0610039N | 1.757229  | 1.833797 | 0.778046 | -1.05575 | 12.97254 | 19.95047 | 6.92E-06 | 0.000859  | 11.88027 | 13.6375  | 13.71407 |
| ILMN_1243900 | Eppk1    | 0.430236  | 0.325296 | 0.913634 | 0.588338 | 9.222268 | 19.93129 | 6.97E-06 | 0.000859  | 8.804977 | 9.235213 | 9.130273 |
| ILMN_2611022 | Bcl11b   | 1.468135  | 0.78712  | 1.446169 | 0.659049 | 7.02859  | 19.87157 | 7.11E-06 | 0.000859  | 6.103234 | 7.57137  | 6.890354 |
| ILMN_2792089 | Srebf1   | 2.910583  | 3.200975 | 1.386988 | -1.81399 | 7.550546 | 19.29484 | 8.64E-06 | 0.000924  | 5.67591  | 8.586493 | 8.876885 |
| ILMN_3114641 | Pik3r1   | 1.161104  | 0.702799 | 1.261061 | 0.558263 | 9.388383 | 18.91834 | 9.85E-06 | 0.000994  | 8.607142 | 9.768247 | 9.309941 |
| ILMN_2655929 | 2700055K | -1.83886  | -1.19039 | -0.69375 | 0.496642 | 7.410723 | 18.90185 | 9.90E-06 | 0.000994  | 8.341471 | 6.502612 | 7.151084 |
| ILMN_2629266 | Por      | 1.717489  | 1.586172 | 0.890593 | -0.69558 | 6.009512 | 18.67009 | 1.07E-05 | 0.001016  | 4.960948 | 6.678438 | 6.547121 |
| ILMN_2914957 | Znhit3   | -1.27777  | -0.56415 | -1.05848 | -0.49433 | 8.713407 | 18.43412 | 1.17E-05 | 0.001048  | 9.438507 | 8.16074  | 8.874356 |
| ILMN_1239411 | 6430510M | 0.685354  | 0.663844 | 1.229145 | 0.565301 | 5.83813  | 18.0953  | 1.32E-05 | 0.001098  | 5.193544 | 5.878898 | 5.857388 |
| ILMN_3139875 | Acot1    | 2.968899  | 3.437789 | 1.129237 | -2.30855 | 10.48069 | 17.10775 | 1.90E-05 | 0.001325  | 8.596705 | 11.5656  | 12.03449 |
| ILMN_2769680 | 0610039N | 2.01655   | 2.189183 | 0.803175 | -1.38601 | 11.78149 | 16.97027 | 2.00E-05 | 0.001367  | 10.52926 | 12.54581 | 12.71844 |
| ILMN_2701824 | BC060631 | 1.15559   | 0.469768 | 1.040889 | 0.571121 | 7.819073 | 16.78989 | 2.14E-05 | 0.001388  | 7.152511 | 8.3081   | 7.622279 |
| ILMN_1250928 | Atbf1    | 1.161024  | 0.96285  | 1.488117 | 0.525267 | 6.301932 | 15.55877 | 3.46E-05 | 0.001814  | 5.398935 | 6.559958 | 6.361784 |
| ILMN_1225764 | 1700018O | 1.749246  | 2.020081 | 1.085155 | -0.93493 | 10.02617 | 15.23503 | 3.94E-05 | 0.001945  | 8.812546 | 10.56179 | 10.83263 |
| ILMN_2704777 | Cyp2d26  | 0.934984  | 1.157952 | 0.60429  | -0.55366 | 11.4484  | 14.95931 | 4.42E-05 | 0.00205   | 10.77409 | 11.70908 | 11.93204 |
| ILMN_2971845 | Dtymk    | -1.10698  | -0.52128 | -1.0261  | -0.50482 | 9.450313 | 14.64996 | 5.02E-05 | 0.002177  | 10.1139  | 9.006922 | 9.592627 |
| ILMN_2687744 | Rnf167   | 0.673888  | 0.964633 | 0.436287 | -0.52835 | 8.605293 | 14.42198 | 5.53E-05 | 0.002286  | 8.086591 | 8.760479 | 9.051223 |
| ILMN_2673566 | Eif4ebp2 | 0.911621  | 0.653307 | 1.212136 | 0.558829 | 6.771427 | 14.33213 | 5.74E-05 | 0.002329  | 6.077161 | 6.988782 | 6.730467 |
| ILMN_1217378 | Pts      | -0.85075  | -0.65101 | -1.18904 | -0.53803 | 8.006    | 14.1491  | 6.21E-05 | 0.002399  | 8.678702 | 7.827948 | 8.027687 |
| ILMN_3086136 | Centg2   | 1.314992  | 0.97147  | 1.477433 | 0.505963 | 8.632616 | 14.0876  | 6.38E-05 | 0.00243   | 7.691642 | 9.006634 | 8.663112 |
| ILMN_2704826 | Acaa2    | 1.147225  | 0.757933 | 0.027913 | -0.73002 | 10.79392 | 13.4536  | 8.42E-05 | 0.002807  | 10.31066 | 11.45788 | 11.06859 |

|              |           |          |          |          |          |          |          |          |          |          |          |          |
|--------------|-----------|----------|----------|----------|----------|----------|----------|----------|----------|----------|----------|----------|
| ILMN_2704822 | Acaa2     | 1.182596 | 0.679095 | 0.089727 | -0.58937 | 11.18949 | 13.35251 | 8.81E-05 | 0.002887 | 10.70164 | 11.88424 | 11.38074 |
| ILMN_2638781 | 2310057G  | -0.89258 | -0.81502 | -1.34416 | -0.52914 | 6.849659 | 13.16373 | 9.59E-05 | 0.003056 | 7.612597 | 6.720019 | 6.797582 |
| ILMN_2604224 | Sema5a    | 1.221195 | 0.873763 | 1.421254 | 0.547491 | 7.733631 | 12.67922 | 0.00012  | 0.003503 | 6.854579 | 8.075773 | 7.728342 |
| ILMN_2604494 | Podxl     | 0.81064  | 0.479646 | 1.094266 | 0.61462  | 6.884344 | 12.64536 | 0.000121 | 0.003512 | 6.288206 | 7.098845 | 6.767852 |
| ILMN_1229534 | Rnf167    | 0.672134 | 0.955281 | 0.420837 | -0.53444 | 8.403773 | 12.60251 | 0.000124 | 0.003536 | 7.89171  | 8.563844 | 8.846991 |
| ILMN_2771709 | Ppargc1b  | 1.157458 | 0.581034 | 1.139074 | 0.558041 | 7.593214 | 12.56113 | 0.000126 | 0.003576 | 6.873822 | 8.031281 | 7.454856 |
| ILMN_2844097 | Ches1     | 0.55256  | 0.593863 | 1.110043 | 0.516179 | 6.986218 | 12.35108 | 0.000139 | 0.003812 | 6.422101 | 6.974661 | 7.015964 |
| ILMN_2498659 | Tom1l2    | 0.771728 | 0.557708 | 1.088174 | 0.530466 | 5.480775 | 12.09697 | 0.000157 | 0.004122 | 4.876372 | 5.6481   | 5.43408  |
| ILMN_2742599 | Nfix      | 1.169534 | 1.042793 | 1.607915 | 0.565121 | 7.892273 | 11.82811 | 0.000179 | 0.004533 | 6.937213 | 8.106747 | 7.980006 |
| ILMN_2641069 | Plekhj1   | -0.69869 | -0.53337 | -1.10351 | -0.57013 | 6.421484 | 11.77253 | 0.000184 | 0.00459  | 7.005376 | 6.306689 | 6.472003 |
| ILMN_2810539 | EG630499  | 0.926325 | 1.307603 | 0.758903 | -0.5487  | 10.24017 | 11.73696 | 0.000187 | 0.004637 | 9.491958 | 10.41828 | 10.79956 |
| ILMN_2704823 | Acaa2     | 1.071917 | 0.587673 | -0.02011 | -0.60779 | 10.91261 | 11.54677 | 0.000205 | 0.004895 | 10.50274 | 11.57466 | 11.09041 |
| ILMN_2602687 | Rpa2      | -0.11862 | -0.31433 | -0.82347 | -0.50914 | 6.869148 | 11.46515 | 0.000214 | 0.004978 | 7.183253 | 7.064636 | 6.868922 |
| ILMN_2663230 | Slco3a1   | 1.123575 | 0.54658  | 1.059876 | 0.513297 | 6.386537 | 11.41308 | 0.000219 | 0.005054 | 5.70403  | 6.827605 | 6.250609 |
| ILMN_2882425 | Fahd2a    | -0.65686 | -0.31518 | -0.91119 | -0.59601 | 7.100657 | 11.2936  | 0.000233 | 0.005279 | 7.571464 | 6.914603 | 7.256286 |
| ILMN_2676852 | Slc6a3    | 2.180522 | 3.009134 | 0.450313 | -2.55882 | 7.414241 | 11.21156 | 0.000242 | 0.005436 | 6.004249 | 8.184771 | 9.013382 |
| ILMN_2705361 | Dhrs8     | 0.697109 | 1.095754 | 0.601131 | -0.49462 | 12.06772 | 11.13958 | 0.000251 | 0.005536 | 11.46922 | 12.16633 | 12.56498 |
| ILMN_2705804 | Pap       | -2.78937 | -3.07359 | -1.74134 | 1.33225  | 6.075931 | 11.05238 | 0.000263 | 0.005629 | 7.977005 | 5.187637 | 4.903415 |
| ILMN_1227458 | B230104P  | 0.511175 | 0.750635 | 1.282981 | 0.532346 | 5.751053 | 11.04208 | 0.000264 | 0.005632 | 5.114856 | 5.62603  | 5.86549  |
| ILMN_2636463 | Tcf4      | 0.072571 | 0.392514 | 0.900434 | 0.50792  | 9.123708 | 11.02211 | 0.000267 | 0.005653 | 8.782328 | 8.854899 | 9.174842 |
| ILMN_1243722 | Prosapip1 | 0.825566 | 0.443895 | 0.949845 | 0.505949 | 9.225352 | 10.8846  | 0.000286 | 0.005882 | 8.670526 | 9.496091 | 9.114421 |
| ILMN_2648445 | Slc27a2   | 1.610784 | 1.743156 | 0.761872 | -0.98128 | 10.25992 | 10.8758  | 0.000287 | 0.005882 | 9.230965 | 10.84175 | 10.97412 |
| ILMN_1247173 | Tyms      | -0.7349  | -0.79017 | -1.34078 | -0.55061 | 6.52677  | 10.86233 | 0.000289 | 0.005901 | 7.243232 | 6.508329 | 6.453062 |
| ILMN_2718204 | Scgf      | -0.44551 | -0.17124 | -1.04495 | -0.87371 | 5.378986 | 10.83905 | 0.000293 | 0.00594  | 5.79441  | 5.348902 | 5.623174 |
| ILMN_2670427 | 2010100O  | -0.57689 | -0.28735 | -0.80696 | -0.51961 | 9.89733  | 10.8234  | 0.000295 | 0.005957 | 10.31513 | 9.738241 | 10.02778 |
| ILMN_1216446 | Slc5a4b   | 1.125917 | 1.194003 | 0.680751 | -0.51325 | 10.53337 | 10.7675  | 0.000304 | 0.006074 | 9.783207 | 10.90912 | 10.97721 |
| ILMN_2591592 | BC049806  | -0.54793 | -0.76096 | -0.26566 | 0.495291 | 5.27474  | 10.73656 | 0.000308 | 0.006142 | 5.668377 | 5.120447 | 4.907422 |
| ILMN_2737163 | Sqle      | -0.84946 | -1.14848 | -0.35859 | 0.789892 | 9.144094 | 10.69622 | 0.000315 | 0.006215 | 9.733229 | 8.883764 | 8.584745 |
| ILMN_2605512 | Lamb3     | 1.427968 | 1.977088 | 1.018471 | -0.95862 | 9.644571 | 10.47551 | 0.000353 | 0.006671 | 8.538689 | 9.966657 | 10.51578 |
| ILMN_1248415 | Tgoln1    | 0.917474 | 0.983661 | 0.335942 | -0.64772 | 9.501161 | 10.46392 | 0.000355 | 0.006686 | 8.941891 | 9.859366 | 9.925552 |
| ILMN_1217041 | Cd86      | -0.59698 | 0.125201 | -0.41983 | -0.54503 | 6.828997 | 10.34012 | 0.000379 | 0.007021 | 7.051897 | 6.454921 | 7.177098 |
| ILMN_2743244 | Cd86      | -0.69438 | 0.132494 | -0.53208 | -0.66458 | 7.071694 | 10.26466 | 0.000395 | 0.007215 | 7.345186 | 6.650809 | 7.47768  |
| ILMN_2979824 | Rgs5      | -0.33183 | 0.524107 | 1.05015  | 0.526043 | 7.744374 | 10.07711 | 0.000436 | 0.007681 | 7.433766 | 7.101939 | 7.957873 |
| ILMN_2680128 | 3110050K  | 0.801918 | 0.715797 | 1.275952 | 0.560155 | 5.962869 | 10.05189 | 0.000442 | 0.007756 | 5.264452 | 6.06637  | 5.980249 |

|              |           |          |          |          |          |          |          |          |          |          |          |          |
|--------------|-----------|----------|----------|----------|----------|----------|----------|----------|----------|----------|----------|----------|
| ILMN_2852533 | Ahcy      | 1.12293  | 1.011648 | 0.194395 | -0.81725 | 8.479618 | 10.02146 | 0.000449 | 0.007858 | 7.897375 | 9.020305 | 8.909023 |
| ILMN_2883016 | Nav1      | 0.880756 | 0.753508 | 1.371069 | 0.617561 | 7.011943 | 9.999434 | 0.000454 | 0.007904 | 6.26061  | 7.141366 | 7.014118 |
| ILMN_2658219 | M6pr      | -0.00227 | -0.12791 | -0.62745 | -0.49954 | 6.732157 | 9.986343 | 0.000458 | 0.007928 | 6.921564 | 6.919291 | 6.793657 |
| ILMN_1226703 | Ndor1     | -1.24046 | -1.23651 | -0.51078 | 0.725737 | 6.118934 | 9.725212 | 0.000527 | 0.008628 | 6.865871 | 5.625411 | 5.629358 |
| ILMN_3038404 | Tcf25     | 0.714732 | 0.589999 | 1.225697 | 0.635698 | 5.72333  | 9.710099 | 0.000532 | 0.008643 | 5.090723 | 5.805455 | 5.680722 |
| ILMN_2699989 | 2510038A: | -0.6005  | -0.26829 | -0.82485 | -0.55657 | 6.885799 | 9.604164 | 0.000564 | 0.008946 | 7.309209 | 6.708712 | 7.04092  |
| ILMN_1237375 | Scd1      | 3.047694 | 3.876356 | 1.21968  | -2.65668 | 10.89368 | 9.575098 | 0.000573 | 0.009021 | 8.857752 | 11.90545 | 12.73411 |
| ILMN_2619574 | Slc35e3   | 1.567928 | 1.51134  | 1.008468 | -0.50287 | 9.104555 | 9.4594   | 0.000611 | 0.009414 | 8.08262  | 9.650549 | 9.59396  |
| ILMN_2604226 | Sema5a    | 1.113445 | 0.819398 | 1.4067   | 0.587301 | 8.203748 | 9.334391 | 0.000655 | 0.009719 | 7.368862 | 8.482308 | 8.18826  |
| ILMN_1225090 | Gdf9      | 0.922178 | 1.176303 | -0.07143 | -1.24773 | 7.126181 | 9.243013 | 0.000689 | 0.010022 | 6.619418 | 7.541596 | 7.795721 |
| ILMN_2733193 | Cth       | 0.170596 | -0.2739  | -0.86333 | -0.58943 | 6.921453 | 9.180785 | 0.000714 | 0.010218 | 7.163113 | 7.333708 | 6.88921  |
| ILMN_2613682 | Ace       | 1.427315 | 1.62799  | 1.034486 | -0.5935  | 8.466922 | 9.153498 | 0.000725 | 0.010326 | 7.444474 | 8.871789 | 9.072464 |
| ILMN_2733185 | Cdc42ep3  | -0.51785 | -0.43933 | 0.19859  | 0.637918 | 6.673433 | 9.135734 | 0.000732 | 0.010371 | 6.863081 | 6.345227 | 6.423753 |
| ILMN_2654952 | Hmgcs1    | -0.35221 | -0.19636 | 0.389262 | 0.585617 | 11.99984 | 9.079473 | 0.000756 | 0.010647 | 12.03967 | 11.68746 | 11.84331 |
| ILMN_1259322 | Pdk4      | 2.612085 | 2.650517 | 1.242112 | -1.40841 | 8.845804 | 8.997149 | 0.000792 | 0.011017 | 7.219626 | 9.83171  | 9.870143 |
| ILMN_2815138 | Myom1     | -0.42068 | -0.00311 | 0.495984 | 0.499097 | 6.151371 | 8.967596 | 0.000806 | 0.011151 | 6.133323 | 5.712643 | 6.13021  |
| ILMN_2613683 | Ace       | 1.347163 | 1.633539 | 1.115494 | -0.51804 | 8.313795 | 8.860981 | 0.000857 | 0.011597 | 7.289746 | 8.636909 | 8.923284 |
| ILMN_2795395 | Hmgb2l1   | -0.3802  | -0.86093 | -0.25823 | 0.6027   | 5.302849 | 8.808721 | 0.000883 | 0.011798 | 5.677688 | 5.297487 | 4.816761 |
| ILMN_2709167 | Papln     | 0.516053 | 1.051323 | 0.443435 | -0.60789 | 6.004849 | 8.804457 | 0.000885 | 0.0118   | 5.502146 | 6.018199 | 6.553469 |
| ILMN_2695964 | Lep       | -0.56586 | 1.63915  | 0.456294 | -1.18286 | 6.563519 | 8.72363  | 0.000928 | 0.012208 | 6.181123 | 5.61526  | 7.820273 |
| ILMN_1214880 | Dmn       | 0.233954 | 0.945324 | 1.668273 | 0.722949 | 8.604565 | 8.599414 | 0.000998 | 0.01278  | 7.892678 | 8.126632 | 8.838001 |
| ILMN_1222246 | Adfp      | 1.027548 | 0.831933 | 0.1443   | -0.68763 | 8.196098 | 8.586412 | 0.001005 | 0.01284  | 7.695153 | 8.722701 | 8.527086 |
| ILMN_3077758 | Unc93a    | 0.535628 | 1.044281 | 0.089336 | -0.95495 | 8.236199 | 8.560981 | 0.001021 | 0.012948 | 7.818887 | 8.354516 | 8.863168 |
| ILMN_2642985 | Dhrs8     | 0.728677 | 1.165952 | 0.586065 | -0.57989 | 9.984057 | 8.521488 | 0.001045 | 0.01311  | 9.363883 | 10.09256 | 10.52984 |
| ILMN_3119954 | Mysm1     | 0.346269 | 0.542079 | 1.049293 | 0.507214 | 6.781245 | 8.480906 | 0.00107  | 0.013301 | 6.296835 | 6.643103 | 6.838913 |
| ILMN_2752327 | Pank3     | 1.428081 | 0.699077 | 0.198379 | -0.5007  | 7.051579 | 8.470874 | 0.001076 | 0.013301 | 6.470195 | 7.898276 | 7.169271 |
| ILMN_2594855 | Pdpk1     | 0.784888 | 0.587972 | 1.080601 | 0.492629 | 6.816441 | 8.461196 | 0.001082 | 0.013336 | 6.203075 | 6.987963 | 6.791048 |
| ILMN_2476329 | Whrn      | 0.489667 | 0.470782 | 1.035    | 0.564218 | 7.135422 | 8.353933 | 0.001154 | 0.013926 | 6.63656  | 7.126227 | 7.107342 |
| ILMN_2617977 | 2010109I0 | -2.24131 | -1.23191 | -0.50472 | 0.727194 | 11.52564 | 8.308263 | 0.001186 | 0.014146 | 12.52012 | 10.27881 | 11.28821 |
| ILMN_2756023 | Pcsk9     | -1.27545 | -1.31258 | -0.65994 | 0.652633 | 7.651097 | 8.251424 | 0.001227 | 0.014468 | 8.463089 | 7.18764  | 7.150513 |
| ILMN_2755915 | Pet112l   | -0.09051 | -0.07176 | -0.68593 | -0.61417 | 5.749439 | 8.210063 | 0.001258 | 0.014636 | 5.961489 | 5.870982 | 5.88973  |
| ILMN_2622217 | Myh11     | 0.47912  | 1.136741 | 1.752018 | 0.615277 | 10.02855 | 8.207195 | 0.00126  | 0.01465  | 9.186576 | 9.665696 | 10.32332 |
| ILMN_2606719 | Abcc2     | 1.310982 | 1.128385 | 0.582597 | -0.54579 | 9.630463 | 8.202632 | 0.001263 | 0.014671 | 8.874972 | 10.18595 | 10.00336 |
| ILMN_2852737 | Cdkl1     | -0.13054 | 0.445991 | -0.07149 | -0.51748 | 4.785    | 8.124805 | 0.001324 | 0.015185 | 4.72401  | 4.593468 | 5.170002 |

|              |           |          |          |          |          |          |          |          |          |          |          |          |
|--------------|-----------|----------|----------|----------|----------|----------|----------|----------|----------|----------|----------|----------|
| ILMN_3160750 | AA467197  | -1.19377 | -1.53306 | -0.4243  | 1.108755 | 10.93947 | 8.108742 | 0.001337 | 0.015283 | 11.72726 | 10.53348 | 10.1942  |
| ILMN_2733356 | 2310067E0 | -0.28118 | 0.001813 | 0.701355 | 0.699541 | 9.462644 | 8.065358 | 0.001373 | 0.015568 | 9.357148 | 9.075963 | 9.358961 |
| ILMN_2903945 | Gadd45g   | -0.46873 | -0.59218 | 0.253145 | 0.845322 | 9.374007 | 8.053283 | 0.001383 | 0.015622 | 9.575948 | 9.107217 | 8.983771 |
| ILMN_1258125 | Rab9      | 0.068305 | -0.05409 | -0.64514 | -0.59105 | 7.195929 | 7.987901 | 0.001439 | 0.01605  | 7.353659 | 7.421964 | 7.299569 |
| ILMN_1254307 | 1810011O  | -0.82778 | -0.68733 | 0.005046 | 0.692374 | 8.206879 | 7.953514 | 0.00147  | 0.016276 | 8.584393 | 7.756618 | 7.897065 |
| ILMN_2758717 | Plscr4    | 1.58164  | 2.102339 | 0.833685 | -1.26865 | 8.184907 | 7.936256 | 0.001485 | 0.016418 | 7.055491 | 8.637131 | 9.15783  |
| ILMN_1237518 | Dgkg      | 0.301793 | 0.309697 | 0.813104 | 0.503406 | 4.845901 | 7.919025 | 0.001501 | 0.016519 | 4.489753 | 4.791546 | 4.79945  |
| ILMN_3161120 | 4930403C  | -0.55421 | -0.20769 | 0.745432 | 0.953118 | 6.3688   | 7.913576 | 0.001506 | 0.016554 | 6.372917 | 5.818703 | 6.165231 |
| ILMN_2801568 | Acn9      | -0.65161 | -0.63542 | -1.14538 | -0.50996 | 7.63968  | 7.827381 | 0.001588 | 0.017176 | 8.247783 | 7.596172 | 7.612365 |
| ILMN_2822477 | Ppnr      | 0.250391 | 0.792583 | 1.488469 | 0.695886 | 5.840538 | 7.811209 | 0.001604 | 0.017327 | 5.207677 | 5.458068 | 6.00026  |
| ILMN_2989955 | Bmp1      | 1.043759 | 1.46591  | 0.919109 | -0.5468  | 9.008027 | 7.807143 | 0.001609 | 0.017359 | 8.150832 | 9.194591 | 9.616742 |
| ILMN_2783519 | Acadl     | 1.302471 | 1.432647 | 0.195641 | -1.23701 | 7.055802 | 7.800362 | 0.001615 | 0.017422 | 6.323113 | 7.625583 | 7.755759 |
| ILMN_1227867 | Klra7     | -0.58745 | -0.7772  | -0.06957 | 0.707629 | 5.30158  | 7.76117  | 0.001655 | 0.017664 | 5.660135 | 5.07268  | 4.882939 |
| ILMN_1256186 | Wdr8      | -0.25359 | -0.18917 | -0.72554 | -0.53637 | 6.049404 | 7.74564  | 0.001671 | 0.017705 | 6.341477 | 6.087886 | 6.152312 |
| ILMN_3121851 | Ppp2r5c   | 0.643654 | 0.493735 | -0.05425 | -0.54798 | 10.69981 | 7.706978 | 0.001712 | 0.017929 | 10.42903 | 11.07268 | 10.92276 |
| ILMN_3142104 | Tmprss9   | 0.819702 | 1.612629 | 0.568386 | -1.04424 | 5.427259 | 7.655935 | 0.001767 | 0.01829  | 4.677079 | 5.496782 | 6.289708 |
| ILMN_3071907 | Nme2      | -0.74264 | -0.52241 | -1.02386 | -0.50145 | 5.780194 | 7.651854 | 0.001772 | 0.018315 | 6.352423 | 5.609778 | 5.83001  |
| ILMN_3070469 | Entpd5    | 0.844473 | 0.571637 | -0.0478  | -0.61944 | 6.776753 | 7.629449 | 0.001797 | 0.018475 | 6.434677 | 7.27915  | 7.006313 |
| ILMN_2424299 | Tnfrsf12a | -0.5235  | 0.309146 | -0.2379  | -0.54704 | 8.34562  | 7.606187 | 0.001823 | 0.018624 | 8.458682 | 7.935185 | 8.767828 |
| ILMN_2420368 | Narg1     | 0.298312 | 0.198129 | 0.776067 | 0.577938 | 5.300815 | 7.521925 | 0.001923 | 0.019279 | 4.982689 | 5.281    | 5.180817 |
| ILMN_2615709 | Spc24     | -0.48405 | -0.32366 | -0.89208 | -0.56842 | 6.941777 | 7.44747  | 0.002015 | 0.019877 | 7.366724 | 6.882673 | 7.043066 |
| ILMN_2778555 | LOC192758 | 0.459671 | 0.7351   | 0.015006 | -0.72009 | 5.933095 | 7.400196 | 0.002077 | 0.020211 | 5.630651 | 6.090321 | 6.36575  |
| ILMN_2701271 | Plscr1    | 0.543726 | 0.393987 | -0.54985 | -0.94384 | 10.34476 | 7.339183 | 0.002159 | 0.020756 | 10.24779 | 10.79152 | 10.64178 |
| ILMN_2726371 | Nqo1      | 0.161861 | -0.35221 | -1.00028 | -0.64807 | 8.134216 | 7.325828 | 0.002178 | 0.020877 | 8.431872 | 8.593733 | 8.079664 |
| ILMN_2596596 | Rgs1      | -0.57155 | -0.32714 | -1.11213 | -0.78499 | 6.174854 | 7.319844 | 0.002186 | 0.020911 | 6.677559 | 6.106007 | 6.35042  |
| ILMN_2710678 | Nfic      | 0.360383 | 0.321148 | 0.858393 | 0.537244 | 5.317644 | 7.087635 | 0.00254  | 0.023017 | 4.932663 | 5.293046 | 5.253812 |
| ILMN_3034034 | 1700047I1 | -0.43318 | -0.46897 | 0.257347 | 0.726314 | 6.567465 | 7.07762  | 0.002557 | 0.023084 | 6.728665 | 6.295485 | 6.259698 |
| ILMN_2728385 | Smc6l1    | 0.179356 | -0.46182 | 0.045641 | 0.507457 | 4.948335 | 7.074052 | 0.002563 | 0.023126 | 5.007539 | 5.186895 | 4.545723 |
| ILMN_2681824 | Fbxw7     | 0.300311 | 0.19367  | 0.816316 | 0.622646 | 5.565745 | 7.045728 | 0.00261  | 0.023412 | 5.238171 | 5.538482 | 5.431841 |
| ILMN_2886128 | Pcdha10   | -0.16257 | 0.409766 | -0.151   | -0.56076 | 4.710096 | 7.026327 | 0.002644 | 0.023613 | 4.686045 | 4.523478 | 5.095811 |
| ILMN_2709166 | Susd2     | 1.193605 | 1.920746 | 1.158077 | -0.76267 | 9.302655 | 6.993364 | 0.002701 | 0.023883 | 8.234548 | 9.428153 | 10.15529 |
| ILMN_2653765 | Nusap1    | -0.81628 | -0.70431 | -0.18206 | 0.522248 | 7.699057 | 6.972328 | 0.002739 | 0.024081 | 8.124718 | 7.30844  | 7.420411 |
| ILMN_2911936 | Tia1      | -0.85616 | -0.77155 | -0.14389 | 0.627659 | 5.667049 | 6.970902 | 0.002742 | 0.024091 | 6.109948 | 5.253786 | 5.338401 |
| ILMN_2796382 | Cdsn      | 0.067373 | 0.531745 | -0.03427 | -0.56602 | 4.705291 | 6.881704 | 0.002907 | 0.025103 | 4.564079 | 4.631453 | 5.095824 |

|              |           |          |          |          |          |          |          |          |          |          |          |          |
|--------------|-----------|----------|----------|----------|----------|----------|----------|----------|----------|----------|----------|----------|
| ILMN_2599794 | Apoc1     | -1.43986 | 0.256707 | -0.68772 | -0.94443 | 6.065461 | 6.874717 | 0.002921 | 0.025163 | 6.53318  | 5.093315 | 6.789887 |
| ILMN_2741677 | Bach1     | 0.62881  | 0.31435  | 0.89263  | 0.57828  | 6.707364 | 6.854859 | 0.00296  | 0.025333 | 6.248416 | 6.877226 | 6.562767 |
| ILMN_2908065 | Gtse1     | 0.170816 | -0.43875 | 0.179919 | 0.618668 | 5.122404 | 6.850757 | 0.002968 | 0.02537  | 5.144407 | 5.315223 | 4.705658 |
| ILMN_2636266 | Dmn       | 0.264376 | 0.816433 | 1.432532 | 0.616099 | 7.405838 | 6.84702  | 0.002975 | 0.02537  | 6.777503 | 7.041879 | 7.593936 |
| ILMN_2479370 | Tm4sf4    | 0.35977  | 1.140594 | -0.08863 | -1.22923 | 11.5405  | 6.841416 | 0.002986 | 0.025419 | 11.18757 | 11.54734 | 12.32816 |
| ILMN_2705848 | Decr2     | 0.498073 | 0.229216 | -0.33314 | -0.56236 | 7.511765 | 6.763453 | 0.003145 | 0.026397 | 7.413228 | 7.911301 | 7.642444 |
| ILMN_1217444 | Ppp2r5e   | 0.491925 | 0.116456 | 0.650794 | 0.534338 | 5.64125  | 6.756946 | 0.003159 | 0.026461 | 5.326456 | 5.818381 | 5.442912 |
| ILMN_1214118 | Plekha2   | 0.424746 | 0.029149 | 0.533725 | 0.504576 | 9.742325 | 6.739631 | 0.003195 | 0.026717 | 9.49542  | 9.920166 | 9.524569 |
| ILMN_1236601 | Pole4     | -0.52585 | -0.95981 | -0.42124 | 0.538567 | 5.888825 | 6.730814 | 0.003214 | 0.026805 | 6.365551 | 5.839701 | 5.40574  |
| ILMN_2739760 | Prelp     | 0.546123 | 0.73161  | 1.231107 | 0.499498 | 9.566888 | 6.703995 | 0.003272 | 0.02714  | 8.939678 | 9.485801 | 9.671287 |
| ILMN_2595612 | Idh2      | -0.54307 | -0.86386 | -0.3074  | 0.556467 | 7.063533 | 6.668023 | 0.003352 | 0.027579 | 7.492116 | 6.949042 | 6.628254 |
| ILMN_2659997 | MGC29978  | 2.562533 | 2.637651 | 1.195728 | -1.44192 | 10.76693 | 6.654795 | 0.003382 | 0.027695 | 9.167951 | 11.73048 | 11.8056  |
| ILMN_2964324 | Igfbp5    | 0.495472 | 1.054581 | 1.606136 | 0.551555 | 8.088701 | 6.649809 | 0.003394 | 0.027762 | 7.299654 | 7.795126 | 8.354235 |
| ILMN_3061070 | Slc25a20  | 0.266001 | 0.257821 | -0.54281 | -0.80063 | 8.828325 | 6.623609 | 0.003454 | 0.028071 | 8.833072 | 9.099073 | 9.090893 |
| ILMN_2637757 | Hlx1      | 0.180922 | 0.321538 | 0.833993 | 0.512455 | 6.131721 | 6.617101 | 0.003469 | 0.028168 | 5.797608 | 5.97853  | 6.119146 |
| ILMN_1242418 | Ptk6      | -1.86393 | -1.67484 | -0.56939 | 1.105451 | 6.43725  | 6.599617 | 0.00351  | 0.02834  | 7.464289 | 5.600356 | 5.789453 |
| ILMN_2431150 | Eef2k     | 0.854627 | 0.201778 | 0.889043 | 0.687265 | 5.694934 | 6.572738 | 0.003575 | 0.02862  | 5.208572 | 6.063199 | 5.41035  |
| ILMN_3109491 | 6430527G  | 0.240233 | 0.103087 | 0.645678 | 0.542591 | 8.254339 | 6.558015 | 0.00361  | 0.028831 | 8.00709  | 8.247323 | 8.110177 |
| ILMN_1239397 | Hk2       | 0.332126 | 0.129803 | 0.671258 | 0.541455 | 8.365034 | 6.541929 | 0.00365  | 0.029054 | 8.081737 | 8.413863 | 8.21154  |
| ILMN_2658687 | Ltc4s     | 0.658871 | 1.193245 | 0.030951 | -1.16229 | 8.272467 | 6.536832 | 0.003663 | 0.029089 | 7.8017   | 8.460572 | 8.994945 |
| ILMN_2759365 | Angptl4   | 1.308094 | 1.152221 | 0.266939 | -0.88528 | 10.47073 | 6.536561 | 0.003663 | 0.029089 | 9.788921 | 11.09701 | 10.94114 |
| ILMN_1218384 | 1110019L2 | 0.566668 | 0.440312 | 1.055412 | 0.6151   | 5.749114 | 6.518961 | 0.003707 | 0.029322 | 5.233516 | 5.800184 | 5.673828 |
| ILMN_3150677 | Sprr2a    | -1.30986 | -1.32902 | -0.48197 | 0.847047 | 7.269181 | 6.461626 | 0.003855 | 0.030173 | 8.049395 | 6.739534 | 6.720373 |
| ILMN_2630428 | 3830422N  | -2.13392 | -1.53656 | -0.92251 | 0.614042 | 5.604652 | 6.452278 | 0.00388  | 0.03022  | 6.7529   | 4.618976 | 5.216345 |
| ILMN_1226528 | Kctd2     | 0.215877 | 0.057107 | 0.55899  | 0.501882 | 8.110572 | 6.441144 | 0.003909 | 0.030352 | 7.902579 | 8.118456 | 7.959686 |
| ILMN_1247636 | Ndfip2    | -1.1169  | -1.15981 | -0.55922 | 0.600591 | 8.363952 | 6.433455 | 0.00393  | 0.030481 | 9.072933 | 7.956038 | 7.913123 |
| ILMN_2884610 | Ppapdc1   | -0.08685 | 0.50605  | -0.19451 | -0.70057 | 8.77127  | 6.374846 | 0.004091 | 0.031315 | 8.715098 | 8.628251 | 9.221148 |
| ILMN_2960044 | BC013476  | 2.211242 | 2.11695  | 0.321973 | -1.79498 | 5.656082 | 6.342689 | 0.004182 | 0.031766 | 4.493541 | 6.704783 | 6.610491 |
| ILMN_2685234 | Dhrs8     | 0.689893 | 1.151199 | 0.455732 | -0.69547 | 7.428401 | 6.287594 | 0.004344 | 0.032623 | 6.854195 | 7.544088 | 8.005394 |
| ILMN_2632092 | Ppp1r9a   | -0.22041 | -0.16506 | 0.561033 | 0.726093 | 6.470066 | 6.278161 | 0.004372 | 0.032761 | 6.426175 | 6.205765 | 6.261115 |
| ILMN_1244908 | Apip      | -0.31774 | -0.1573  | -0.78914 | -0.63184 | 6.507881 | 6.257617 | 0.004435 | 0.032994 | 6.823925 | 6.506183 | 6.666629 |
| ILMN_2746283 | Mrvi1     | 0.007754 | 0.718283 | 1.277291 | 0.559007 | 8.677545 | 6.238416 | 0.004494 | 0.033234 | 8.176713 | 8.184466 | 8.894996 |
| ILMN_2874836 | C730027E1 | 0.252334 | 0.65892  | -0.18209 | -0.84101 | 7.29216  | 6.193021 | 0.004638 | 0.03394  | 7.109868 | 7.362202 | 7.768788 |
| ILMN_1231439 | Aatk      | -0.00347 | 0.357171 | 0.872133 | 0.514962 | 6.495823 | 6.05997  | 0.005091 | 0.036365 | 6.189364 | 6.185894 | 6.546535 |

|              |          |          |          |          |          |          |          |          |          |          |          |          |
|--------------|----------|----------|----------|----------|----------|----------|----------|----------|----------|----------|----------|----------|
| ILMN_1218266 | Meis1    | -0.42623 | 0.176665 | 0.710858 | 0.534193 | 7.197203 | 6.025016 | 0.005218 | 0.036907 | 7.081879 | 6.655653 | 7.258543 |
| ILMN_2598478 | Sncg     | -0.64268 | 0.508445 | -0.26718 | -0.77563 | 7.303184 | 6.020927 | 0.005233 | 0.036979 | 7.403539 | 6.760857 | 7.911983 |
| ILMN_3141195 | Zfp692   | -0.32475 | -0.26752 | 0.346028 | 0.613548 | 5.06246  | 5.98905  | 0.005352 | 0.037415 | 5.12402  | 4.799269 | 4.856501 |
| ILMN_2644827 | Pte2a    | 1.901263 | 1.74812  | 0.480966 | -1.26715 | 5.852125 | 5.93627  | 0.005556 | 0.038525 | 4.819537 | 6.7208   | 6.567657 |
| ILMN_2688236 | Atp2a3   | 0.277473 | 0.239489 | 0.789462 | 0.549973 | 11.10833 | 5.935951 | 0.005557 | 0.038525 | 10.78172 | 11.0592  | 11.02121 |
| ILMN_2755660 | Ptma     | -0.53403 | -1.0376  | -0.43983 | 0.597772 | 7.425521 | 5.923222 | 0.005607 | 0.038751 | 7.928386 | 7.394355 | 6.890785 |
| ILMN_2754435 | Ldb2     | -0.0703  | 0.16917  | 0.757383 | 0.588213 | 5.552468 | 5.908694 | 0.005666 | 0.039004 | 5.338404 | 5.268105 | 5.507575 |
| ILMN_1251426 | Klf7     | 0.568586 | 0.414884 | 0.970355 | 0.555472 | 6.936042 | 5.891599 | 0.005735 | 0.039367 | 6.447586 | 7.016172 | 6.862469 |
| ILMN_2727847 | 2210407G | 0.270083 | -0.2766  | 0.418571 | 0.695173 | 6.246803 | 5.888032 | 0.00575  | 0.039389 | 6.14379  | 6.413873 | 5.867188 |
| ILMN_2694320 | Mia2     | 0.888967 | 0.632711 | 0.025307 | -0.6074  | 6.306945 | 5.868077 | 0.005832 | 0.03975  | 5.920199 | 6.809165 | 6.552909 |
| ILMN_1228385 | Itpr3    | 0.080769 | -0.01259 | 0.4893   | 0.50189  | 8.138871 | 5.866039 | 0.00584  | 0.039777 | 7.999501 | 8.080271 | 7.986912 |
| ILMN_3151642 | Myocd    | -0.07452 | 0.280276 | 0.931097 | 0.650821 | 5.485925 | 5.819008 | 0.00604  | 0.040698 | 5.201711 | 5.127194 | 5.481987 |
| ILMN_2651462 | Mus81    | 0.157619 | 0.459944 | -0.14768 | -0.60762 | 5.325608 | 5.800806 | 0.006119 | 0.041083 | 5.208137 | 5.365756 | 5.668081 |
| ILMN_2640357 | Olf1317  | 0.131884 | 0.332155 | -0.21048 | -0.54263 | 4.675099 | 5.788818 | 0.006172 | 0.04131  | 4.611708 | 4.743593 | 4.943864 |
| ILMN_2604885 | Lmod1    | -0.17111 | 0.34482  | 1.030254 | 0.685434 | 6.564084 | 5.77229  | 0.006246 | 0.041676 | 6.263093 | 6.091982 | 6.607913 |
| ILMN_1246201 | Cacna1h  | 0.026313 | 0.309359 | 0.833805 | 0.524446 | 7.131141 | 5.763491 | 0.006286 | 0.041796 | 6.838771 | 6.865084 | 7.14813  |
| ILMN_2662934 | Reg3g    | -2.87821 | -3.54583 | -1.19544 | 2.350392 | 8.431078 | 5.727156 | 0.006452 | 0.042387 | 10.33595 | 7.457736 | 6.790117 |
| ILMN_1219717 | Sort1    | 0.724613 | 0.222092 | 0.873646 | 0.651554 | 10.12099 | 5.670381 | 0.006723 | 0.043522 | 9.6659   | 10.39051 | 9.887991 |
| ILMN_2955818 | Ugt2b36  | 0.261594 | 0.435192 | -0.61989 | -1.05508 | 8.654474 | 5.665715 | 0.006746 | 0.043619 | 8.635249 | 8.896843 | 9.070442 |
| ILMN_2764781 | Pls3     | -0.29141 | -0.17534 | 0.396853 | 0.572196 | 5.398753 | 5.658874 | 0.006779 | 0.043757 | 5.416227 | 5.124819 | 5.240884 |
| ILMN_3146204 | Ndor1    | -1.05396 | -1.04144 | -0.47908 | 0.562361 | 7.025609 | 5.604538 | 0.007052 | 0.044854 | 7.669227 | 6.615269 | 6.62779  |
| ILMN_2627441 | Peli1    | -0.07208 | -0.59098 | 0.060842 | 0.651822 | 6.75844  | 5.595493 | 0.007099 | 0.045085 | 6.908995 | 6.836914 | 6.318015 |
| ILMN_2937261 | Mod1     | 1.039991 | 0.972564 | -0.0583  | -1.03086 | 5.643231 | 5.514675 | 0.007531 | 0.047005 | 5.154667 | 6.194658 | 6.127231 |
| ILMN_2658054 | Dhrs4    | 0.422783 | 0.394355 | -0.32618 | -0.72054 | 9.287005 | 5.514243 | 0.007534 | 0.047005 | 9.164266 | 9.587049 | 9.558621 |
| ILMN_2715664 | Atf1     | 0.184606 | 0.635885 | -0.03948 | -0.67537 | 4.830706 | 5.463012 | 0.007823 | 0.048233 | 4.635454 | 4.82006  | 5.271339 |
| ILMN_2758896 | 2410019G | -0.3014  | -0.21942 | 0.290507 | 0.509931 | 7.343688 | 5.451642 | 0.007888 | 0.048541 | 7.401268 | 7.099865 | 7.181844 |
| ILMN_2834728 | Prkcn    | 0.243943 | 0.34788  | 0.881608 | 0.533728 | 7.384961 | 5.446585 | 0.007918 | 0.048574 | 7.016603 | 7.260546 | 7.364483 |
| ILMN_1224250 | B230342M | 0.979327 | 0.773346 | 0.179281 | -0.59407 | 8.677489 | 5.43097  | 0.00801  | 0.048926 | 8.194501 | 9.173828 | 8.967847 |
| ILMN_2820948 | Dbt      | -0.05938 | -0.55179 | -0.00246 | 0.549332 | 6.450127 | 5.399992 | 0.008195 | 0.049674 | 6.603535 | 6.544155 | 6.051742 |

| WD_Tg_Tc | WD - Chow | WD_Empty_Vector - Chow | WD_Tg_Tomatoes - Chow | WD_Tg_Tomatoes - WD_Empty_Vector |
|----------|-----------|------------------------|-----------------------|----------------------------------|
| 6.442145 | 1         | 1                      | 1                     | 1                                |
| 11.4117  | 1         | 1                      | 1                     | -1                               |
| 7.352513 | 1         | 1                      | 1                     | 1                                |
| 11.31226 | 1         | 1                      | 1                     | -1                               |
| 7.130221 | 1         | 1                      | 1                     | 1                                |
| 6.895079 | -1        | -1                     | -1                    | 1                                |
| 7.936038 | 1         | 1                      | 1                     | 1                                |
| 7.763964 | -1        | -1                     | -1                    | 1                                |
| 9.546765 | 1         | 1                      | 1                     | 1                                |
| 6.355081 | 1         | 1                      | 0                     | -1                               |
| 8.784992 | -1        | -1                     | 0                     | 1                                |
| 7.082141 | 1         | 0                      | 1                     | 1                                |
| 12.65832 | 1         | 1                      | 0                     | -1                               |
| 9.718611 | 1         | 0                      | 1                     | 1                                |
| 7.549403 | 1         | 1                      | 1                     | 1                                |
| 7.062897 | 1         | 1                      | 1                     | -1                               |
| 9.868204 | 1         | 1                      | 1                     | 1                                |
| 7.647726 | -1        | -1                     | 0                     | 0                                |
| 5.851541 | 1         | 1                      | 1                     | 0                                |
| 8.380024 | -1        | -1                     | -1                    | 0                                |
| 6.422689 | 1         | 1                      | 1                     | 1                                |
| 9.725943 | 1         | 1                      | 0                     | -1                               |
| 11.33244 | 1         | 1                      | 0                     | -1                               |
| 8.1934   | 1         | 0                      | 1                     | 1                                |
| 6.887051 | 1         | 1                      | 1                     | 0                                |
| 9.897702 | 1         | 1                      | 1                     | 0                                |
| 11.37838 | 1         | 1                      | 1                     | -1                               |
| 9.087802 | -1        | 0                      | -1                    | 0                                |
| 8.522877 | 1         | 1                      | 0                     | -1                               |
| 7.289296 | 1         | 1                      | 1                     | 1                                |
| 7.489661 | -1        | -1                     | -1                    | 0                                |
| 9.169075 | 1         | 1                      | 1                     | 0                                |
| 10.33857 | 1         | 1                      | 0                     | -1                               |

|          |    |    |    |    |
|----------|----|----|----|----|
| 10.79137 | 1  | 1  | 0  | 0  |
| 6.268437 | -1 | -1 | -1 | 0  |
| 8.275832 | 1  | 1  | 1  | 0  |
| 7.382472 | 1  | 0  | 1  | 1  |
| 8.312547 | 1  | 1  | 0  | -1 |
| 8.012897 | 1  | 0  | 1  | 0  |
| 7.532144 | 1  | 1  | 1  | 0  |
| 5.964546 | 1  | 1  | 1  | 0  |
| 8.545128 | 1  | 1  | 1  | 0  |
| 5.901869 | -1 | 0  | -1 | -1 |
| 10.25086 | 1  | 1  | 1  | 0  |
| 10.48263 | 1  | 0  | 0  | 0  |
| 6.35978  | 0  | 0  | -1 | -1 |
| 6.763906 | 1  | 0  | 1  | 0  |
| 6.660274 | -1 | 0  | -1 | -1 |
| 6.454562 | 1  | 1  | 0  | -1 |
| 12.07036 | 1  | 1  | 1  | 0  |
| 6.235666 | -1 | -1 | 0  | 0  |
| 6.397837 | 0  | 1  | 1  | 0  |
| 9.682762 | 0  | 0  | 1  | 0  |
| 9.62037  | 1  | 0  | 1  | 0  |
| 9.992836 | 1  | 1  | 0  | 0  |
| 5.902456 | -1 | -1 | -1 | 0  |
| 4.749459 | 0  | 0  | -1 | -1 |
| 9.508167 | -1 | 0  | -1 | -1 |
| 10.46396 | 1  | 1  | 0  | 0  |
| 5.402713 | -1 | -1 | 0  | 1  |
| 9.374637 | -1 | -1 | 0  | 1  |
| 9.55716  | 1  | 1  | 0  | 0  |
| 9.277833 | 1  | 1  | 0  | -1 |
| 6.632069 | -1 | 0  | -1 | -1 |
| 6.813101 | -1 | 0  | -1 | -1 |
| 8.483917 | 0  | 1  | 1  | 1  |
| 6.540404 | 1  | 1  | 1  | 0  |



|          |    |    |    |    |
|----------|----|----|----|----|
| 8.091769 | 1  | 1  | 0  | -1 |
| 7.631678 | 1  | 0  | 1  | 0  |
| 6.294116 | 0  | 0  | -1 | -1 |
| 6.355095 | -1 | -1 | 0  | 0  |
| 6.31642  | 1  | 0  | 1  | 0  |
| 6.484354 | -1 | 0  | -1 | -1 |
| 10.07743 | 1  | 1  | 0  | -1 |
| 9.091089 | 1  | 1  | 0  | 0  |
| 8.775562 | 1  | 0  | 1  | 0  |
| 6.547989 | 1  | 1  | 0  | -1 |
| 6.299779 | 0  | 0  | -1 | -1 |
| 8.47896  | 1  | 1  | 0  | 0  |
| 7.061671 | -1 | -1 | 0  | 1  |
| 12.42893 | -1 | 0  | 1  | 1  |
| 8.461738 | 1  | 1  | 0  | 0  |
| 6.629308 | -1 | 0  | 1  | 1  |
| 8.40524  | 1  | 1  | 1  | 0  |
| 5.419461 | 0  | -1 | 0  | 1  |
| 5.945581 | 0  | 1  | 0  | 0  |
| 6.637417 | 0  | 1  | 0  | -1 |
| 9.56095  | 0  | 0  | 1  | 0  |
| 7.839453 | 1  | 1  | 0  | 0  |
| 7.908223 | 0  | 1  | 0  | -1 |
| 9.949948 | 1  | 1  | 0  | 0  |
| 7.346127 | 0  | 0  | 1  | 0  |
| 6.668574 | 1  | 0  | 0  | 0  |
| 7.283676 | 1  | 0  | 1  | 0  |
| 7.67156  | 0  | 0  | 1  | 0  |
| 12.0154  | -1 | 0  | 0  | 0  |
| 7.803146 | -1 | -1 | 0  | 0  |
| 5.275556 | 0  | 0  | -1 | -1 |
| 10.93859 | 0  | 0  | 1  | 0  |
| 9.457569 | 1  | 1  | 0  | 0  |
| 4.652519 | 0  | 1  | 0  | -1 |

|          |    |    |    |    |
|----------|----|----|----|----|
| 11.30295 | -1 | -1 | 0  | 1  |
| 10.0585  | 0  | 0  | 1  | 1  |
| 9.829093 | 0  | -1 | 0  | 1  |
| 6.708524 | 0  | 0  | -1 | -1 |
| 8.589439 | -1 | -1 | 0  | 1  |
| 7.889176 | 1  | 1  | 0  | 0  |
| 5.302857 | 0  | 0  | 1  | 0  |
| 7.118349 | 0  | 0  | 1  | 1  |
| 7.102401 | 0  | 0  | -1 | 0  |
| 6.696146 | 0  | 0  | 1  | 0  |
| 9.069941 | 1  | 1  | 0  | 0  |
| 6.518753 | 1  | 1  | 0  | -1 |
| 5.590567 | -1 | -1 | 0  | 1  |
| 5.615941 | 0  | 0  | -1 | -1 |
| 10.37478 | 1  | 0  | 0  | -1 |
| 5.245465 | 0  | 1  | 0  | 0  |
| 5.328564 | -1 | 0  | -1 | 0  |
| 6.386873 | 1  | 0  | 0  | 0  |
| 8.220784 | -1 | 0  | 0  | -1 |
| 5.758756 | 0  | 0  | 1  | 0  |
| 6.474644 | 0  | 0  | -1 | 0  |
| 5.645657 | 0  | 1  | 0  | -1 |
| 9.697942 | 0  | 0  | 0  | -1 |
| 7.431597 | 0  | 0  | -1 | 0  |
| 5.565432 | 0  | 0  | -1 | 0  |
| 5.791056 | 0  | 0  | 1  | 0  |
| 6.986012 | 0  | 0  | 0  | 1  |
| 5.053181 | 0  | -1 | 0  | 1  |
| 6.054487 | 0  | 0  | 1  | 0  |
| 4.535049 | 0  | 0  | 0  | -1 |
| 9.392625 | 0  | 1  | 0  | 0  |
| 7.942659 | -1 | -1 | 0  | 0  |
| 5.966061 | -1 | -1 | 0  | 0  |
| 4.529806 | 0  | 1  | 0  | -1 |

|          |    |    |    |    |
|----------|----|----|----|----|
| 5.845461 | -1 | 0  | 0  | 0  |
| 7.141047 | 0  | 0  | 1  | 0  |
| 5.324326 | 0  | 0  | 0  | 1  |
| 8.210035 | 0  | 0  | 1  | 0  |
| 11.09894 | 0  | 1  | 0  | -1 |
| 7.080087 | 1  | 0  | 0  | -1 |
| 5.97725  | 1  | 0  | 1  | 1  |
| 10.02915 | 0  | 0  | 1  | 1  |
| 5.944307 | 0  | -1 | 0  | 0  |
| 10.17079 | 0  | 0  | 1  | 0  |
| 7.18472  | 0  | -1 | 0  | 0  |
| 10.36368 | 1  | 1  | 0  | 0  |
| 8.90579  | 0  | 0  | 1  | 0  |
| 8.290262 | 0  | 0  | 0  | -1 |
| 6.631601 | 0  | 0  | 1  | 0  |
| 6.894904 | -1 | -1 | 0  | 0  |
| 6.097615 | 1  | 0  | 1  | 0  |
| 8.652768 | 0  | 0  | 1  | 1  |
| 8.752995 | 0  | 0  | 1  | 0  |
| 7.832651 | 0  | 1  | 0  | -1 |
| 10.05586 | 1  | 1  | 0  | 0  |
| 6.288929 | 0  | 0  | 1  | 0  |
| 7.56742  | -1 | -1 | 0  | 0  |
| 5.830386 | -1 | 0  | 0  | 0  |
| 8.461569 | 0  | 0  | 1  | 1  |
| 8.513714 | -1 | -1 | 0  | 0  |
| 8.520583 | 0  | 0  | 0  | -1 |
| 4.815514 | 1  | 1  | 0  | 0  |
| 7.309927 | 0  | 1  | 0  | 0  |
| 6.987208 | 0  | 0  | 0  | 1  |
| 6.034785 | 0  | 0  | -1 | 0  |
| 9.454003 | 0  | 0  | 1  | 0  |
| 6.927781 | 0  | 0  | 0  | -1 |
| 7.061497 | 0  | 0  | 1  | 0  |

|          |    |    |   |    |
|----------|----|----|---|----|
| 7.792736 | 0  | 0  | 1 | 0  |
| 7.136357 | -1 | 0  | 0 | -1 |
| 5.470049 | 0  | 0  | 0 | 1  |
| 5.300503 | 1  | 0  | 0 | 0  |
| 11.57118 | 0  | 0  | 1 | 0  |
| 7.488557 | 0  | -1 | 0 | 0  |
| 6.095787 | 0  | 0  | 1 | 0  |
| 7.417941 | 0  | 0  | 1 | 0  |
| 6.56236  | 0  | 0  | 0 | 1  |
| 5.945506 | 1  | 0  | 0 | 0  |
| 8.488802 | 0  | 0  | 1 | 1  |
| 6.132808 | 0  | 0  | 1 | 0  |
| 5.060457 | 0  | 0  | 0 | -1 |
| 4.401232 | 0  | 0  | 0 | -1 |
| 7.293348 | 0  | 0  | 1 | 0  |
| 7.672576 | 0  | 0  | 1 | 0  |
| 9.140509 | 0  | -1 | 0 | 0  |
| 10.53955 | 0  | 0  | 1 | 0  |
| 8.015362 | 0  | 0  | 0 | -1 |
| 5.81308  | 0  | 0  | 0 | 1  |
| 7.190151 | -1 | -1 | 0 | 0  |
| 6.969837 | 0  | 0  | 0 | 1  |
| 5.096367 | 1  | 0  | 0 | -1 |
| 8.838083 | 0  | 0  | 0 | -1 |
| 4.595973 | 0  | 0  | 0 | -1 |
| 7.691775 | 0  | 0  | 0 | 1  |
| 7.898211 | 0  | 0  | 1 | 0  |
| 8.373781 | 1  | 0  | 0 | 0  |
| 6.601074 | 0  | -1 | 0 | 0  |
